# Supplementary material for: Archaeal Tuc1/Ncs6 Homolog Required for Wobble Uridine tRNA Thiolation Is Associated with Ubiquitin-Proteasome, Translation, and RNA Processing System Homologs
Source: PLoS One. 2014 Jun 6;9(6):e99104. doi: 10.1371/journal.pone.0099104 (PMC4048286; doi:10.1371/journal.pone.0099104)
Supplement: File S1 — Supporting Information. File S1 includes: Table S1. Strains, plasmids used in this study; Table S2. Oligonucleotide primers used in this study; Figure S1. Dendrogram analysis of Haloferax volcanii NcsA and homologs of the α hydrolase (ANH) superfamily from archaea, eukaryotes and bacteria; Figure S2. 3D-structural model of Haloferax volcanii NcsA; Figure S3. Organization of ncsA and its targeted deletion on the genome of Haloferax volcanii; Figure S4. Growth of Haloferax volcanii ΔncsA mutant compared to parent strain H26 at optimum growth temperature; Figure S5. Lys204 residue of NcsA is found isopeptide linked to SAMP2; Figure S6. Detection of E1-like UbaA and PAN-A/1 ATPase in NcsA-StrepII pull-down fractions. (PDF) [file pone.0099104.s001.pdf]

JVBERi0xLjUNJeLjz9MNCjc2OSAwIG9iag08PC9MaW5lYXJpemVkIDEvTCAxMTIxNTE1L08g
NzcxL0UgMTU1NTY1L04gOS9UIDExMTk3ODYvSCBbIDUzOSAzNzddPj4NZW5kb2JqDSAgICAg
ICAgICAgDQo3OTcgMCBvYmoNPDwvRGVjb2RlUGFybXM8PC9Db2x1bW5zIDUvUHJlZGljdG9y
IDEyPj4vRmlsdGVyL0ZsYXRlRGVjb2RlL0lEWzxBRTg5MUU2RUQ0QTRFQkJERERGNUVBRUEw
MjVBREE0QT48QjlBMzNDRjk3OEQyRUU0REE5RTQzQjhGM0JDQTI5RjM+XS9JbmRleFs3Njkg
NTJdL0luZm8gNzY4IDAgUi9MZW5ndGggMTI5L1ByZXYgMTExOTc4Ny9Sb290IDc3MCAwIFIv
U2l6ZSA4MjEvVHlwZS9YUmVmL1dbMSAzIDFdPj5zdHJlYW0NCmjeYmJkYBBgYGJgYG4BkQyh
IJJxP4hkWwlmW4FJQzBpDBafAyJZvoPJeBDJpAsiWTPAsnxg9mKwbDmYdATrTQCRxsdBpMk1
sEg0iDT6C7Y3EUgyRoDVh4LdkA1WyRAFEjcNB5L/Hs9mYGJkYJ4AFmdgHDDyP8N/8dcAAQYA
o/cVhw0KZW5kc3RyZWFtDWVuZG9iag1zdGFydHhyZWYNCjANCiUlRU9GDQogICAgICAgDQo4
MjAgMCBvYmoNPDwvRmlsdGVyL0ZsYXRlRGVjb2RlL0kgMzYzL0wgMzQ3L0xlbmd0aCAyODgv
UyAyNjQ+PnN0cmVhbQ0KaN5iYGBgZmBgKmDgYGAQMmQQYkAAIQZWIGRh4BBncDEOzpqYyjAp
5QADL983UeXOS+vaXGpOlSxkTGLoTrc8J5CBpM/FcefXOcpaEdYKR9rjxZalSvitv3bIsVOq
+GXWuR9tybotKQ4ra8L9apfzHHO+4aFiCVSsG3T9WOWGCUnFry3cwq5aQlhZRkublHjPr3ko
GXSAgcGiAwQaGDhAFNBxHVA+kwaEhSTEKAETYkKjwfJYfQFU48wgHOgOZEgBsSzYJ1EM/Ayn
RG3YGXgLpBUDGs+1sDIuE7HQXeAyoXnBzwPMRrkZPxhYeyUYqh5vtftq1sCQ+Zv1RWCE2YWS
BkhIMLkxCCdPBDIYgbgXyPdkEC62gfAZJQACDAD7o3NjDQplbmRzdHJlYW0NZW5kb2JqDTc3
MCAwIG9iag08PC9NZXRhZGF0YSA1ODMgMCBSL1BhZ2VMYWJlbHMgNzY1IDAgUi9QYWdlcyA3
NjcgMCBSL1R5cGUvQ2F0YWxvZz4+DWVuZG9iag03NzEgMCBvYmoNPDwvQ29udGVudHNbNzc2
IDAgUiA3NzcgMCBSIDc3OCAwIFIgNzgwIDAgUiA3ODEgMCBSIDc4MiAwIFIgNzgzIDAgUiA3
ODQgMCBSXS9Dcm9wQm94WzAgMCA2MTIgNzkyXS9NZWRpYUJveFswIDAgNjEyIDc5Ml0vUGFy
ZW50IDc2NyAwIFIvUmVzb3VyY2VzIDc5OCAwIFIvUm90YXRlIDAvVHlwZS9QYWdlPj4NZW5k
b2JqDTc3MiAwIG9iag08PC9GaWx0ZXIvRmxhdGVEZWNvZGUvRmlyc3QgMTkwL0xlbmd0aCAx
MzUwL04gMjIvVHlwZS9PYmpTdG0+PnN0cmVhbQ0KaN7MWGtPKkkQ/Sv90ZuNTr8fyY0Jiii7
q2su7LoJ4cMoc3USBAJjov/+VlUzgAyEATe6IWPX9FR3VfecOXVaFzzjzIXAhNHMc86kwFYw
7Sy0ktlgoFXMCwetZoJbdDBMaDIsE04IMBwTQaCvZ5IrDkZgUnocCbPqAD7gJy06C8mkN+Aj
FFPSoaGZMhTGMM29BMMyrbSnwNpgdsIzbT06B6aDEuz79+TitbjsFGmRgX3ZEbQUzn6cniat
8aiAzm5X0DqgE2xJa4i2oqSjrSnLaBvKL9qWMou2o1Si7SmJGOh2On7oZEUvuW22km72WvRP
TyHwX7fsZzqcZWBcM5F0GvPbzjXjJ1wm3bdJtkw/GU/icxrbmD1ko4I5w5PzdhMmZ84bCn2e
Tq6y/PGpgBfBedLMouexBNfWMH2cMetp6Wdn49fesZMGnsGrFNJyGCJ0n5620ud8+HZ0ng7z
+2n+Lfblw0xCIEuBsOcmfc6SP25al7cXv81dj9sFGA/0uFNMs+LhKbkZT5/TIXXdxdw0pBYd
G6PHYcaOhUk6Rfb8D0x/4p2Pi8cBuIBpPinG0+TflYXRLpylswx9tqSAO/M2g1nbo59j3PDp
IJvmo8ej9gC2JC/eviU/ssd8VkzfjhqD8X32Lem8TCbD7Bl3DELgDN3xZbt5nU6SclDSvItb
+z47+jZwXzov9wUmD2PRAxcil8tJ7nqqJ6XtG6t7cPW9lz3FbV8IHjv6dZYWX+sghZcCTrMe
fpAQvJ9cjB7GA1jjIt3jq0VGmARPuuO/Rzk4Zcw5FdFaJleB1k4sBfsxLAW5AUutr8dSJYXF
vt7lo8Zoli/uW/l0Vpw/pVOmdRUScYP/TOcuQorl25i+ZN3ytcyxkQ+Kp1kPtheGSYN7Y4CB
6lz83c+4wIxGXrJIlx453AIfWqnKeSVnWi78ibeMVkCkEvzpzsZZ413501QPDHAeXho4mFrn
mQLKL/ulRO4DUibLAbXHJ4pazhREUj4wpeIYrZFTtIL42vW3MVzgNRlOr4ASa8axwuIjNQe8
1uA3V8HkVWMBiD3ByOdQ9Hx/GK5G/WwuM/twWclhYJuesnIDh62upUpe9hDyMjvIq6yL/hDU
QPEG1Ng5apzYjZqwATWXCxo5Gw8HO6DjtkAHUjgEO2uxPxtAfh8AWWl7JogFkPq711MFUTgE
RPqjFVDJD8EmiCpszq6+DjbrsevUverbF2K97skadU+BqlakrLH6IYAk1CCt6ldBFB+rddDC
qzBWUPXjVAe1CWA7qoayrHBQFT0gweIzmMEoqpAWqhEoJA3nG2vUWoVd1kOoazCfhrMHtlhu
FJ5MXOyXsbJ5ThYeZ8hLRW+ohFAjFRxJlHbzHqcNZYkzqLChGu4Jyb3rX1BVSJ63v6L+rUSt
gUPlqjhc11/O1cChE1hapBSgaRRdUfcsdZmCM1BtTFpP11I9LfWZAcVTKrSIzKVGU8AlpUrz
gBIL+LFWklazgMuo1gLpM6sl6TUfUJvFPjgJM0XKMP6NsTVGBp2OmKc2ROWmnaB71GtShRXt
Fv2NdPMW8KoBr0BcpN5wDsgW94z0G3wpKpgtX8u2X9zZ1R3a76cw4+C3K0d9yNnYwhrnbG4N
fDpu96djqp9Os/2OUWsdadzWI40Q4cQBivf/mDbn8cmyQJi9z8jOb5IDm1dTEQXiIGUZ/tNj
8QEwshtg9Pv/BEYb86gjE2wVDX5dJvA6x2PrttHIhvI/pxUfaQUJdl9yMZKIk4QJ/pdSiThr
LO1lGwkyZqaQvoFzsKjDGBsPwwFg/EuAAQDUDhTODQplbmRzdHJlYW0NZW5kb2JqDTc3MyAw
IG9iag08PC9GaWx0ZXIvRmxhdGVEZWNvZGUvTGVuZ3RoIDI0Mz4+c3RyZWFtDQpo3lRQwU7F
IBC88xV71HiA0qoxaUjMe5cenhpbvfNgW0ksEEoP/XsBmxoPQGaWmZ1deurOnTUR6FtwqscI
o7E64OLWoBCuOBkLFQdtVNxRudUsPdAk7rcl4tzZ0UHbEvqeiksMG9wMQ3XHboG+Bo3B2Ckx
Df/4TEy/ev+NM9oIDIQAjSOhp4v0L3JGoEX4Rw6bR+AFV3tvp3HxUmGQdkJoGWO1SE9zzwSg
1f/rpPlVXUf1JQM5frNnJhLidZNR/dRkVD/yhDirSq0YtpyzB0GS7+6QO+Tpj8RqDSENU1ZU
IuewxuKxRe98zpUP+RFgAAEdco0NCmVuZHN0cmVhbQ1lbmRvYmoNNzc0IDAgb2JqDTw8L0Zp
bHRlci9GbGF0ZURlY29kZS9MZW5ndGggMjM0Pj5zdHJlYW0NCmjeVFC7bsQgEOz5ii0TpQDj
k9JYlpK7xkUeip30HKwdpDMgjAv/fRZiOUoBaGaYYVh+7i6dswn4e/S6xwSjdSbi4teoEa44
WQeVBGN12lHZ9awCcDL325Jw7tzooWkY/yBxSXGDu2E4PYh74G/RYLRuIuYkP7+I6dcQbjij
SyCgbcHgyPj5RYVXNSPwYvwjhy0gyIKr/W1vcAlKY1RuQmiEEHVLR/0oW0Bn/uus/nVdR/2t
IjtuiyfREpLZRN7nKqMS0UhRkUZJuydn5v8eHfUaI9UvQyklcz3r8Jhb8CE3yYv9CDAAgmFv
7A0KZW5kc3RyZWFtDWVuZG9iag03NzUgMCBvYmoNPDwvRmlsdGVyL0ZsYXRlRGVjb2RlL0xl
bmd0aCAyMzY+PnN0cmVhbQ0KaN5UUE1PxSAQvPMr9qjxAKUaNWlIzHuXHvyIrd55sK0kFsiW
HvrvpdjUeAAyszvD7PJTe269S8DfKJgOEwzOW8I5LGQQLjg6D5UE60zaUbnNpCPwLO7WOeHU
+iFA0zD+notzohWu+r6+EdfAX8kiOT9m5lZ+fGamW2L8xgl9AgFKgcWB8dOzji96QuBF+Ef2
a0SQBVf738HiHLVB0n5EaIQQtcrPg31UgN7+r7P6V3UZzJcmdnSLJ6Eyqu9lRlJUBRWLpjrf
ScWy067ZPLd5j4xmIcrxy1JKyC2e83jsLYa4JdkO+xFgALWbcGMNCmVuZHN0cmVhbQ1lbmRv
YmoNNzc2IDAgb2JqDTw8L0ZpbHRlci9GbGF0ZURlY29kZS9MZW5ndGggMTM2ND4+c3RyZWFt
DQpIicRX227jNhR891fokQJWDO+i2qJAmqJFtt2Fu/Hbpg+Ko9jq2pJryRvs3/dQlHWh7Nhy
mjZB4iCkRofD4Zzh1a931FsUk59mk6vZjHnUmz1NKMGR9gh8278YF1hoTzIshDdbT4i3gJ/Z
3Px6nnxGd7vNJt+WaeYHEi38P2fvDRi1YPCo0BSwZj9PfiCE8B9nf3XehRkTdhDDYGhQ0W32
lG/XcZnmmW8nN1iaE9VMp9X0CpTwkB0AD2VUTw8MvDTzP6OpH2gsUbxInFoZJpxp+wBpsI8V
jGi/OiyJZsOFcjsasBBrJqkX0ArCmSXtLOIpiklIm5JpxUjD8KJ+pdgTIrUIjxQsDzCsmKXg
NvNDzNGTL3GIcl/D31tfASlrn6DY16iE/ymU2qFsz1P9WtngcdFuQf3mIMKa6NCsUxAhXiqN
2Ekgsf5yZ/HDKumvlGEWcjZipaxmjuI+ELAvqTgCpBqgqF0j4Zazu3LrBwroiH0oG8jJind7
YupN5phAmSfBO4oXFnuziot1+ugHAvCLAaoMo2NrP4ha7TLaFcmj3xMhxRGPohFIsjoysNQ+
TudgnVeQrmDKZVq4BQmtThO23w1UlLvHb9iVRotx4HFVOZnyQuYxBRtUWRjsIUyKqqHIC8FY
wOYkuEI1aryl2hh0vTHz9hAa5okOSlUxHJwOlFY4Eh0o9M5hjgkVHq0VlrofNceBKquOeL1J
5+lqBf6KhdkMVx864qdJ3CMb4NoGtkmRFmWczX2BKUqMrhn63oEHSV4Ejz5+7ZJHwwiH6mX2
qKZYq3+LPlbTl+Vf7cHKzQIj9OAHHD5SHxabzwd0Vs3ufyGTHVxG3RWfVvGi33Aolv1DCE3Q
KRTaZY10MZPoo/Og6jz40htbPy+T7TrN4lUfiJs4cS7Pne7wS0tE4yJKnE1E0Fg6KodATKtj
/fRIUdYo5vlj25353pjOhzI6qvtMkfy9g14coiSbJ0P9UHG0QjqA7VLBDlNRHRIw1m2yub31
e/WxvsAul9CN86DknJ8roZqVSkPm4EqIIwFFoCbXBcVxZg4SXqvgrrf0Zu9UeMr0AkkgTMAs
k2LeQA+tHBLIaQyBHKpPPNQEP1VrtwvyEIfawIO/PvT6oMTUxH0Ox8CMBp2EMoWE4gdAC4Kc
ciChnI4DPdXZQPCcbBOXI3IayY30wHYGAt7NSzfwQMOWI3tXBRg7OQXrk2o44tr5apU/F9+5
1kfH+Ewrq9kycR1L0pELtKr/Y5d+uVnG2SJxGYvYSAu0lP2eLpZlNhA9x+FleEVaDtYqxmxm
p2U8pttkKA6O+fmN3qDxOlCsdyZPRNA/zKeCOy/cC5hp+cqYkxlKfPh/YQKbhqARwG/3zMBZ
G9f+6hvNl7R0aSFjJFAxXHvLPbpeGE8NUQoXLmuu5eBsUzVSq/UtLpkvs3yVL9KkuPf7NUus
TlqWu5VWt8/u0YQTMPIs1UQevB6dbCGBpBBjVdgzfRvUUZm7rnG+K7ateJFkyTZ2xc+xGgfG
2pulL47b9sittcl+8/76A4Uv1zrazn3SvdtrQpwNtkGOEcegLH1RWV2tSeu2D9+c/YzGdoFa
GNObT68Sbfcy+Jzaa2C5dHYTrk5j11nbwGabrv1Ag0kl26FGXgicL7kLmlJ6NaXsFaH/DTVy
mXQPrPL+4H0kGnkfsXHo7vrDtOJrn9aEIqZLMBpBYLCJzfiXDT2/KfGpm95ECOkM4h0jWNWT
bWx3zRc32fu/ykKsvgauwY2GxjYuFb9CEMa7VWXchv1+XzFnwKjfzWnjenQjfQ7SF0Ppj3Pb
NxF/JKI+mvePAAMAnM5LzA0KZW5kc3RyZWFtDWVuZG9iag03NzcgMCBvYmoNPDwvRmlsdGVy
L0ZsYXRlRGVjb2RlL0xlbmd0aCA5NDQ+PnN0cmVhbQ0KSInsV01P20AQvedX+LiWms1++FOq
KkXlUKhaRcUHJNKDSZzElWNHsYHy77vrdQgeB+ohQeXQCwpi85idee/NW0kDi1nR2UD9mA0+
Msbkp+jXYBRFnsWtaDGgQni+OTKkjLm+Pkfi0janZHMq8HanegBR/dcap0rWmyyukg9tOElD
B4GnC2NBDbhNyk0yq9K7JHtoYzo08KVEYXJHn7smU3KZ2ENJA5LYP6OLJ6Cc+h6uTHPvKL7J
knZ9Qp1EddCtkS4FmESInUR9SbIotm0gTjmOGiw03ZrXvZKkitOsBP0S1AuwgzWMK3JYHnOR
4zQFkjjLYMskFslMcbNN18m2hNxVtEH0X/Aa67ZM5vCGaBEII4IU9Ir62FZxQ65qlZawKAfJ
CkOvsrqdP0xtCjnv49C4odgkUwakSCbIOp0Diqn+/1UBQyekYWAN1W12KhBmohfjbzzkDFqH
ZFjWGobcQ6Pk1MUKQJg7L5WsHOqQ3Kir+W2rzNN8gn1wsPp1zaRuHqA6sLbJPONxDgQKewB1
mHP2fQxbGPQXWE2awHQwS5emVXGVKjuBtGH97fepLy3gJkSbySnuqa/ZEGWxjZfrJK/skLoE
GrBiRR8v2G8Hb8e+PKm5ptbocVTTlcpnmIYjrGP8fPL5R1djOIIYoPu0WnVG8IpVatZCx+nQ
iaZp/Sa2h4FSfLqFw+TYjnGjzAkfTQSszxG43GDoRuK8s7ZcrAJEk7MmUt80JKOJ08kNDhb0
FUMVL1n5l8Xv3fbiOyCPP1tUgzV0OZWi3jR6hbQh74psFudp2oZVToTOSGZdn136rI0lcFiP
2qwFX6xTJXdOZh2rdNAr4VQe98zrA12PaD0/2nChOses0BLcV6q1eKDE6+l/ve7NPdHksKqA
932BMi+XukoglOz/9NA1md593eTnnRlA6UtfAKh9ANqXdLUqjoPaPyivydWNPfSJsjqP+uS8
+8zCTlg07lmmOiB1FyE6RZxk3z9JmtGYS07h20H2eb2dPA8frlBlYRFw8V6ysEbij+Zkuyrd
qMkKtRmbYCIPBRMMb04XTY6KwKcxTr15hOYm2D3vOA0r+be/vXtr9k82B7IguuWySXHF/HZW
QYEKDPv3YkryWTFP8yWE85Gpq+nz91k5hgGO4fxMmGtODyQkQfm/jr0q9eq8C2aJforuaOGO
Jm4n8CKN+1WB9w0i5WEskCX3Oj4+S+4Z9j9LHmB/c8kmS9oB9cxe4mRqd26LXgBvHCWtPwIM
AO7JRAUNCmVuZHN0cmVhbQ1lbmRvYmoNNzc4IDAgb2JqDTw8L0ZpbHRlci9GbGF0ZURlY29k
ZS9MZW5ndGggMTA0Nz4+c3RyZWFtDQpIicxXyW7bSBC9+yt4bAJhu1cuwCCAEyOIHTgQEt2C
OdASpXBGpASJmUzm66c3k2a3bLls2fGFF7Wfa3n16hWNposTinkakWh6fqI+s5M/CCH87fSv
k9PpNI2ofpFIgmkaJRQL/QwTQnP9FH2eVxexfcrtU4oLlmb3w2HWP0k0VmqwuvUYCecHoroF
o1GoQfm0aYOIcgaLRz/7hnZ1V8UcM7SL/5xejgEFCJBkJrT1wk+Qc/5gILRZlbumno8xOFad
ML8fLBDhNq/NZSxxjs7UN0VXsWoYykmBvSQFJsAkhUny/PNZUP6HAw3VX2zLZSxRU7WdFxnH
2cOJYSKTJrLZuu3Kuq3b5ThAgVl6J2PZXkTGDGK7m90kS/tkC6+nPGMeFiej6HJHty5OdF+2
1ebiwkuZYXl3iM/IOQPEHG0UXxi6jLUIoLMrllMWUOYAcqF+JlERCZIqlYiozLBqTWP/jWEn
+lnufPrIHJq6q2i9W69KNcOJHuJ5wCJGAZXQxLQRXv/yKlrksOgKG9222nXbehYnAmeoi9Wn
XrdBRSkk+R4dVe1/v5oqkIrsUMaJpGoajNBrkjpMq6zzeqlC1kF6sBmUUtQG+bPuvgdaAeqI
tKV8VzYfY4ElCucGVDxqx7ps5wEHISnifmberVRYOdr4cSlACayZzCxk2cZJFrBZAUK27iCK
16sfSmBH2TJMxR0KdoM0KNjQzWpP1aBJurKt6qWZW6GUxs+UQdXfNbVufX9BcQpRgEELUfe9
8qEOOSiPHlnPD6lou4lzTAPyqvoJqJMy4Rnj4sUnoK04yv4YuY6zq0LEmUo0Cxe6vzRfxjIS
i7Ks2mpb+jXjOAXaDG9RSsztnuRvAlmXIEvkaGdLWPhhwtbPq6icXjPGKN26KBx5dZKqZuKN
b9JAYvJ0Md9XfEpp7oc1SOFvaMA31QGzYVwb/LlKgTUjdBhW1YQ41bdBeBmAdd3BTtQFY92Y
vmP8YCnE4o4bI6V82lQcyX3eMp9qNFT5GKq0YU6Rbo+fsuhvt5c1oJaAU+HDQEX4KBdfv/bt
1t9jLwl4Sx9jdaHS+2vhqnyYAbYsFBd+We65M++YG9vxv6+f2PFHNyoRORY3Qj1cBE5bF9ty
2VS+f1TrHHysCjs0Vcy1mOmRydBsPa/bZegV2GNyL99/nXzwfa6A+KueWE50CyO6asYF2jva
B2+tZxlut10m77+McQr1hERFxDjTBx6lhVK2aNq8xMnWj90tpd1s66ba7nzmUJhwUOsZJsXp
hBK/u8UDxr1/8ljDwO5bJx8X/2KHRW+w7rk59mM5YvyzXs3Ktq4DdYTsp2Q4/M6/ZkHFQFh9
aGbXrZtazQRFs2BeBWQQjrpWXuPl5xj7adNeBNkx6HZ4upOM/hdgAKVxQeENCmVuZHN0cmVh
bQ1lbmRvYmoNNzc5IDAgb2JqDTw8L0ZpbHRlci9GbGF0ZURlY29kZS9MZW5ndGggMjMwPj5z
dHJlYW0NCmjeVJA9b8QgDIZ3foXHVh3gkkhVpQipulsy9ENN2p0DJ0W6AHLIkH9foFGqDoD8
2o/9Yn7uLp2zEfg7ed1jhNE6Q7j4lTTCFSfr4FSBsTruUbn1rALwBPfbEnHu3OihbRn/SMkl
0gZ3w/D4IO6Bv5FBsm5KSlN9fiWlX0O44YwuggApweDI+PlFhVc1I/AC/onDFhCqEp/22d7g
EpRGUm5CaIUQtUxPVTcS0Jn/eVb9UtdRfytiR7V4FpLtUCvqp0ayxO5VuUv+4eFKr0TJcFlD
sZUNWYfHpoIPeXY+7EeAAQAgbm05DQplbmRzdHJlYW0NZW5kb2JqDTc4MCAwIG9iag08PC9G
aWx0ZXIvRmxhdGVEZWNvZGUvTGVuZ3RoIDEzMTI+PnN0cmVhbQ0KSInEV9uO2zYQffdX6JEC
apZ3SkVRYC8JkARN010Xfdj0wbFpr1pbcmQtFvsj+d4ORVmSKQteom77tF6YHs6cOXPOEBPC
otli8oCuN7HACdq9i/+YvZ98P5vxiEaz1YRiKTmPSDS7nRB79EdCCP9p9qc9o9wZzJjS7giG
b6k9hvZZZfaxO9fGSsTh4FisqaRYJ3BqSrGwB6c2pK5DFqvjeDjhganVxaLd+6ufU6HxcTSB
SUilNi/qsPu0me/jKccMbbOlhx/HVJ2reTRJKdVxjhwnZ0N16RFeR3qeD/ogk8CcElfp2uSx
gjpNDO1RqJxXxi9YYHo+xz6IUtRZfnnxmpvqwG4QVQeaCT9QGhrIZXT78WrI36BArCHIJlvH
U4E1mldZEU8TTFE+4AlhAT256FS4cimmfrkshLr1QDjG/fXFb8HrKWGjNGz7uIy1JdtQk1IW
MAbU8aIqfJxUSFKX1cmL0axToVU5X8cSbU1eDbilX1/q5fX2odYylsQaUTZQi0DM0jqzxbws
X7J87asjG9cMdvAXgrkVBOsvBEIfjSrKF/thN0L1gzoFz3KfcqCZNJQkLlb1aPxQPIy+bjKv
N8Bc3wzCyNHZux9IBE/ApXimOp5J0AyBZAxDKodzENLKTs+G3hRmcY0RV6UBAzjB2vNq9q/Y
E3XD9JxVj4NIrw6EPmxMXjz7NZGW6P+dEDYLwK7YvGxNOd8bf8HTZ9fPFL4mURpxTTAsPSno
Ewzg1sHlmL8rs6L0Ew1eVi5qSpusNqX1vIo5rGXuvyLHA/6zkL2vt+G+zZbGbrgCrqpevLAM
p//L4Pf8YL7Z+BMaGonzZpm/gd2WwIZ2N3T44EWyIWRZLJ8W1d6fkTOttlalhW9Uh+Wo2SkF
7JTGfmDI38QZ2H5ouy/kXJ3m7eBtBK+iQe0yeLu/zGOm05sHtCjyVVZuAT4G8/KPHjKX8YpW
Fx7Q/Rx8jKN8bcphW4MegZdyi4PJ7q0SoK9P9Z/cPgRTtLCu5sOnSGBfmEv1M/rt7WC1CMLQ
qcu7m+u7Qc0htOtR5d7YgqEm2BBP1hq2EDRWclOU5nOMj5NkWIwJgxgE638rmyLBuVhtY+6T
ZpGSKbbE2vYn6b4q51n+XXwUGshF1Nj1zQXT5hB0nlFYHr0drB74WMFrt50o0fqPSmWHgpDt
DcNbOKYEiH58R+N3t2a/KLNdZa/hqLAcpEBFe5vCIqmLrz/QBJRGRErBMAtbP3F2cVy0jxhN
FIb6OtROgMBSLKnseCIdpsVTuTA+pAkjY/yVbUe19JWk3TIObU/S0U3x0BqOUwGm3WtN7xFR
mpUpTe4nCL9JTtL3zWyiAAmAL8FKREJrnEJDZFSayWpyPbMxknHScei3OJCO1baF3hzIrpua
tBRypKbkFDYNeRcF7DzHTcSCw1idY66gsNCdYi7a1/Ow/8EHhwidjoRt3YyzlPeo2p7hAtyJ
JN6strgKmCR2AtdTaJIEeGTRtAQ5OTgHqRFS0g6vZmRmv3wCQ0kQdYJNBqaiNDmj1tDOlvKo
Vmgo5OuERlk0oYJY2VKUYYATAIH5g+ZDQb9HuS3Jm0s4LqEoyuGlATWhb024Xxta8dO0ogLe
cKoHRj9NNuDLtDOD0iyuaNNaeqiZUz02mF0wqrrBbMA0+RKUR6CrWAKgDZJtVNhHxtxgmGLP
Yx73tZwt76g+xFTthq1E11PGGp+sBeIYWcYlTi1ddPNycYr34bhdjKd2STjRruhvAQYAl+4/
xQ0KZW5kc3RyZWFtDWVuZG9iag03ODEgMCBvYmoNPDwvRmlsdGVyL0ZsYXRlRGVjb2RlL0xl
bmd0aCAxNDc4Pj5zdHJlYW0NCkiJtFfbbhs3EH3XV+wjF4VYDu80ggI27MZN6qKXRYLCzYMi
y7YKSVYlOZcf6fd2uNzV7pKr6JIUfvDa4Fx45szM4dtsMbgoBppKmzH8KT+4cJTbTIOgNivm
A/JvXvw9uCoGv/mz3xeFyCAr7gfAKOOlWfjiklPFM80stdwbvmCMiR/QFm10sKGcG4UWxeWA
zL3bKLTi1HgXhorSBXntD1EFVnkHaPWd/0cSWjlv0IQmf+V5CFwlSwVTMgRup8WTtIaUMTBZ
MR7ckvXzMhdUkat8KKkkUubvilfeDIIZpw40D3bMm+x3rbQ/RzaPFab/DCCbZgOuJdUaL6Ap
8AyBFAgYp2Cz1WTwNlQpvrRgaNO+dJkCmUbVgv5qCQzlYuMXTBge5+9cBRyBCtPKJVXMHQqp
kAHSh8/5UFFOVucRlkCtZcdhaSqfq0k+tNSRmXetyHk+FFRjslWAinogqTAgGnNWmpOfFh+m
m9XTw2TRZcxQMuqUhWwIlIOv2+XAc0Ntk+uht1QKQgQfoKLRy5tcIX045BLT06JOrAokGhx9
WrIMcNtEGOoX7d/b/3evx6kE0caP/NilGOB9pM6Uc4h0JqjAluOyxa9uK/rjZTeDJ9kRYwCk
oMbH0VTLeAz0F7KqxGg16hIMWhU7gJ/oiUPpCWTsiMFx3MLj3tFs8nyhu7445dqpg53564nA
g/vH3PPz+VzA1w8SCINkNhr/CXGCWAJznDMRptL6k7GJM22Oc8Z51eqzRS7IG9+Npm92WsHF
Xsd4zS2MZWOQh9HsNU9KYkGecmN0VvDEm1Fyf4HrzFrFmI9xrMXwcXVkLUpXd+N5TGEDVu/p
hWbJEZ3ManHorA4p3JLHaW6oJeuXae24Fge0gE7wXt2/v0zour94Q4FFkagB/Cz2yNeZBtxX
y/XPIKIbC9yeSh8FvagG9t3IL3xF5iDyeMpavPqWkuCCwdlZkeP042RRn+d11ZSUrj2V3ek7
1IZgn3CF4gz36w7Vgl93EiOrpEZHX1/rEGC+yYcG3ccLWkizbxi3CHiiWGiqunmcJlPcGHvw
OvgaucJV3dAXCV2V4/YoXFmlUx7X5fy/+51HCoC3dEPis5YvqMa1RYNtAzSL85fJx652QTGl
9K7hmkrx4VbX3JKrxYOf2J5emOtocZeoFXwf7Or9yjXKMJztMunWMAMupk+z0ft1N2PcgHh0
h1tbKzIRRCL69VXurIXr+0+0cmlqELTRuzrA9oMQhu+Hp9l4tJhOu/5woDjY76+9saqGWm9y
TVaj6WJ9VqMpa59MCbfDZ404Ug5LH1G3LU9LsI+Tp6XSrBb15R9eOFtiWMLLpOESn1gSKVuq
Ouimj9PZXUxJ7eSu/VXn14yP7VXI5vNykrAb5K6NsYPdYaRM10i9zSSm3hd4krpr9QoCp/Dd
EbczDn3L9sAWEaVSiONnfMtoLEXcdfggBHPclXWYDU/33du2Ftih2IWmWM5G6/k0qir2hNmp
NfvdhZcgWV6/KXUX2JYQbNr5Ft594TnWTMBj+F49Dq65TqjJ7Z5L4Ip1osVNXTPAlG+7ns6x
bv+WaFEAKgosP69yi4L5KseLyoRbvJXHrly5o84kuvmWfwnRkx64UOmlm+vcEmDldlNJws72
AoFLBgfHqfVsIXZ9g9O1jA5ExnhhENdbWgzvFP+ay/eEVweHb1ZAO5EKh/YpFU6xKNFaDP5a
diXODEfu1mVwTaXHm2XlBzAkE8+kReWKJvNKhb4vW49Rxsuj4QsA2ZVJY6jzJ8lZ3km09e7t
2VJehHodf3I5q2W0fJU7pNE5oopdwD2ulvBxhKsMWDSrLEzkJtBQN9/eFNPThpnTy92bnpNl
eiapurH9C8qj5OXT/5KGOymN02apqPi39NJBksJPK8wH/J+OCEhSAQa7xoBS2n1jRCz7hoi0
aBVYVTKq05GnZwpQZgoxYnLnoMdUjbSnFm9fHjZ/l/0nwABiCSJ6DQplbmRzdHJlYW0NZW5k
b2JqDTc4MiAwIG9iag08PC9GaWx0ZXIvRmxhdGVEZWNvZGUvTGVuZ3RoIDExMTU+PnN0cmVh
bQ0KSInsV0uP2zYQvu+v0JE8iCWHbyQo4KABuila5ODbbhA4tjbr1Ot1Za+R/vuORK1N0Q9J
zqM55OIHNBp+M/N9M8Pxm6tfxmOZiWx8d6UYeKkyno1/u8KP6dVLzrn8dfypsjHBRjADzmZC
4Te4ypKhka+sye9gaDCWO2Op7AmHItgwAKuDyUsOUjVPoXmqDfjwNMeDoD7ohtxvH2mumCXv
aS6YJ1w7Tt+N42Ak886djyU6mtwS2oYluVbPsJTmKSxtIlhc1/Evp+sRTbLlvIMIBbml7RRh
yv3unAOEuWeWc5NhkADC/DDpBg7fN90tWLqBtZ7Q3CCqB5prJsmK5vhnB6w5FTCDxnxBCQRn
Wui6BEL/OCXQ2v1PjK/CdwHV04cJNWR0kHIhvBuacuS6B4CY67tnPE7/kbh4ohB0Ux07WlXH
GqYqMDyrfwgsj7KcGZWNHxp4ZWWGdeZQ24VfQnl0mSmjGfIHbcmLNAjj9UneRKlGQCIA+mt7
BBAeIFxPTMYyNRwSHECqqCUChe8+szYRkMOCnyLSGVc3ZEstMhSJCsyRxXSynM8POMqtbfuW
FhLfeyLum+sNec2mFFDmtXtJFqlrZB3oU9I7wv/1/dNmsyjaCUTg0slzRRUmCjukcLWYrB/m
s7YnyYSV3XBidzyQZFtMN49liktb5c97y4EzUDptVV1a0I4p01MLWlavfXst9MIUtHA5pOfU
V5BM4NjqzehPapBdwKlmisA0IZmK3utbVVnHMCvK+baYvUhZIqWWw/yFZWM6Kct5sU5pYgV0
w2tJtw6dvAXaEmG7LuCBVeXHyVPnunovhFWWy1EyApM6SS6ZjbnTQ/fkbjH5mHal/WA8/3LU
M9aTB2xJol4NJBEHHSNZDY6Kqtl4h4lKGQaup6iUYPI7aKoXpKCpixH9lNRQSUnPLlbUc5kG
Ckp+NUHtdm1xoaD6b2xSMd53YwPP+JdtbPleUqtXi6diPS3nq03bmYry15MYDc+urxNYmnfz
teWnuRQ0AqCSaQw13bSGy6BZ41AHWGTAJGOJSKWI4X0z3rTentWB9TWZwTJtGiWAqvN0N/t8
XghII4ZXnn3B+66UQaCrf8vXkKodvFQdDBa45RozdM9C3ru+e5YwVVzffib0whRmwuWQfg6F
oUNBaCYvngq7QvUUg2yayf0Wb1Ya72+C5oY4U32mDR5XON++03R6t83g2NBc4eAoi+oQqAYI
NlByTXOJ/64POozWvLu3xsxy4Zxb8scKmQVkSY/6HXRHjO546/mmSOenUl4M69tBkYv58u91
6swBP9V34Hlyeqasjwdn5RTi+ims33uKFp4Ih5kmBg7mgvcdDS5B3Wh2sqS5ZYbMEoe4R2AH
OOFRHNSqe9VoEr4pi1U6KaHfzI15oZqZ9jibU48dZ/nxyDTjA1sNNKQu/nkqlhSbFZnSHMGR
4pYedDJhfddOhJoVRgy8ZEiPjbnnTiSxsaijO1H2nwADANCvJhgNCmVuZHN0cmVhbQ1lbmRv
YmoNNzgzIDAgb2JqDTw8L0ZpbHRlci9GbGF0ZURlY29kZS9MZW5ndGggMTA3MT4+c3RyZWFt
DQpIidRXTW/bRhC961fwuATK6e7sN1IYEJBLEjQoXN7iHFRLTl3UskA5Afo3+os7yyUlcmmJ
lCA3zkkCtHr75s3Mm1lA43XGs/Lt7BfOubwq/5r9XJYmE1l5NwNE2/wKnAvMytsZ+/gtp0MG
lKNfeFZ/EUaDcJn0FpTKyocZr49W4aTgwLE+Gr8JQ4foKIIy4Sh7k8dLZXvpCCVh4q8FceK6
vuh2UVX3q20fCMEKbM7WfI5HGOAIOsD9hg0SxlP9YFEg8BABB19HEP4oY8DVet4nkUaPKEGb
TvgNM2nxqncnSK5VZMbu/l58SWAJBH2r0rE/B5FEuOMT2y5yDZI9bDD/XL4Px8VBpfaQZgAZ
lFIYMT+YvDAEqq5bzJ363Gh/XP1CGIIyWSFiWiNdjHU23zxTZ8pm0mnAsRpTnhDpKA8f5xTZ
aXU/hVIs+/MZvZaytw4snlv2u/B/1LJvql6HqhfMXeeFBs9++hA+FTODNlAgnceTsiEb3jfs
97xQYNn81/CpQn764BKQ++mpDpq0bXt1nStAdpMnkAKcNvI4JKXUkizUZWAQ3a6Kat6s/PN+
m2bNoLOnVWTE2j59Xf4TwIqGV98pmjb4JD+nFwrh3Zj3xEMBUejzEbs4DbPdb7yL/gwHfiAe
dfF49KtDHEaNF+doLpLFNF/NPS9d8l1H37v/QSEUcGt7AbwGgoXSwCXtAf0ECb079cy1Smux
c6zGsDbvcw86WKEhRxSeLN0xwQdui16qEffqRD5h27AyzK9p64ZxYUK+/LoxiVPcN86n1CZ0
N+YpCeVckPCCSTGYRELIkV5Nd5i4OyxX1f231TJhJ0FKPTKGkvJsxz0tRbml0VblVHIsrEeB
KgIVRqeqYi1rzgcLBoqTrlX1SsD+2KRAXNmR9bcvMm9E/rKiEnds/fhwfztQWRl7Ij0dUd9+
DBsK7RLDeS/xNKEpz7V2/yYFZbXSJwUccRbr5SAHEk+SrsmmPItRr4ZiMh/vEqAjGuGAUGdB
X99u28VY7PT2bmQfLNCBDy+sZE7GhrlhX7er5cCApZ8e6j7Sp8c0UjOhGrpJNG3Vrleh7zxb
5GDY0yrZtSUYqt29o3QGAEqVaGkp+mNamr2W2NUyrLOJyXmvDpoc0lId7PZ7jMxCIThB5lEg
KElNfZnBiC4OxvSl8AKDUTkwE+eiouyf9+g9bS5OoRTH4vmMumNRtymo1UfmeP3S9APbtt6M
iJ8akY/QzXTMJaX4zQB20ozs2lIc5GFEVmEwJh5iuZn+mKzh6uYP79Je//aTQzUFPkiOIGrJ
9zyqaj1PeixJF/UvzbxOvhpm0mLiGfQgPeoZh/13FMs3TVytNu/eJRZEM1W5Ycf/b+7RmxCX
cg852T3o2VHHf9n1vuWhXgkPdxaPy+VF65qHHvqKU4do1AvBqBzZfwIMAKupH74NCmVuZHN0
cmVhbQ1lbmRvYmoNNzg0IDAgb2JqDTw8L0ZpbHRlci9GbGF0ZURlY29kZS9MZW5ndGggMTAx
Nz4+c3RyZWFtDQpIidRX227bRhB911fwcQmUk93Znb0gQQCjbYAkaBGkfHOKQLCVxkXiGlJr
oH/fWS5FkasLRflS+8WSoeXZM5dzZviirm2hivrLDAyRKmRR/zQDKbGoL2bn4uZdGYDE2S+l
BSeISgIvbPl7/W72oq51elKD88akR2V87pWUUr+u/4xnWnQEpZ0rDHjr9fqO5hJxdlPyUQvG
M4Qsmi/KuEJrC9oW9fcEKpZlQmxvBU0qpEt33KckcAwRL31TJMEhYyrQPmKKlxkc2kB74QBR
2S45KhH/9XYHcWvB4m7uW5ysh3CYkj5IybW/VsxJmlSxi/lyebXgcimxyuqE4KS1h+uUoXLQ
kf4HbJlhOjWMGZWOHxoD+CaQ+KBOcS+vz4ZB5UlApF4KWlra4evBhaAltR0mvnyb/9FiqhYT
yGLXC4cejolSKVGrOTezFt9v1DpNXasGbTZKkL6JZH59mQUCxC2zJ5u4u0bUQF1frPKkgA8e
B1jbUWAIeRRi9fdycfP2bTmoYaUcBEJVVApQkT1SbmhA+XuWmwqAj6C2XdT3qO0Ao2clNq6x
O0lr6wT8H1LD7SQpHE9SrxmekRq7GDcZi9ca6uhtB1uhBFI0UbkK71m20sX/Hl63W8T3iPYQ
n2elWkncpyfJtkvBRN1u9HEfulV7dbuBtFuQTdsnyPe2rGLi9ceyIgjih/fx0whrPmalMLwS
BJxUilYnp5rDund3m0NngEeYwzCb7S7N7lA6sGJRsrq1iEaRZ5VI7qPZGQQBSl4to0NExkc5
BJsVOBvLelhthmcD91swvNGn05MNYF2PMQOgOLGP5WUdmLvR6vuSXb/bNK81WqAsYwvixVYH
bp47Yjo1bROaKC4Xy6vbRdaFGqRTI+XN4FqLSIa1yufK3awqMyjP73mcYg3Ypjh2VTq/vB5z
KC0R9LBCj7BepOyci6+3f30uPRdSei6kEs5kwtIQvJ/mJK1dfRJvysqIyHPYGwqCkepoB+xa
41zMf/zAZEn89uZTuT19DNKYAbgmmkkbAnoHNLogt+r3CPYRpH8UpST8kxn1VU8D1aMgaoYb
ZTXQ4II1k5plRPSWxkU/UOkjip4zwH8VTFY8Bg+qV5qHlnsjytDpnUUJTnyOkzRE2Ve0U/Vh
vJD9Fgmd6L+VAbyYlxH+jtLvbRMs/Ub1eUlHRf9E95xKKzBGq2wZ2fk21Ntx9lJso9UI0YAt
SKbQtXECrb9erfKgLXvJNEmsCf5z+W8EY/qerO576sNc1K/6+G7BPS6dG1j9Q2fidIJt+Z8u
wSeUwZ/rGQ9BHuLI841HpTV8bwHGBe735WLGRJAX4+53bVyczP0DxvEM2wD4/PfiPwEGALiC
HeYNCmVuZHN0cmVhbQ1lbmRvYmoNNzg1IDAgb2JqDTw8L0ZpbHRlci9GbGF0ZURlY29kZS9M
ZW5ndGggMjY+PnN0cmVhbQ0KaN5qYKAG4CBSnQIeuQaGUUBrABBgAOg9ASkNCmVuZHN0cmVh
bQ1lbmRvYmoNNzg2IDAgb2JqDTw8L0ZpbHRlci9GbGF0ZURlY29kZS9MZW5ndGggMTI5MTIv
TGVuZ3RoMSA0MTU2ND4+c3RyZWFtDQpo3rSbCVxVRf//v2fmnHsRlFDJTDIvXkUUt9wyV5RF
UVFAVHAFFYRSw32pDNcUs3rULPVxzzWti5X7/pjlUllPauVTWalpuZRpmsKd/2fmnHu5IJb9
n+fHizcz8505M3Nm5sx8vzMDaUQUQLnEqWG37g0a/XFmy2pIdoG0QWNHO3ZM+vgDIu0RIiM4
M2fIsBU/td9IZGtIVKbikKETMvv0btCeqH9lIjYpKyN98M/tm79ItLIGnm+WBUG59VUeJHog
GuEaWcNGj38m7+JhhLOIWm8c+vSgdHK2+xBFvY7wu8PSx+c8fK5iUzyvI71jePqwjE3a5PNE
S7sQ8S05IzNyBvxLnCGKDyYqz4jrEdorZJCfsdBojFo+arr8OM1g5EfsAYMxpvsz/QwxEUkb
BXKV70vx3R0O6XMLG7lJO2hfysIgWCbj+G6jvCwdLUL2pUgzj3x/EuhJGoX2yqUZNIfm0V46
TQNpKnwLaTmtofXkov10mE7R//DHPcEYRmX5VrJRRSJxW1x2rwHbjEAfyTyEKuqOIokIEldK
yK6454kg9zZbBfJXz5Zjn0H6m1YobrO2MiyayTB7Af4H1BO/2pe633avLVadTtSFkqkH9aRe
lErdqCtIoESKp340gNJpEA2mDMqkIZRF2Wivp2goDaPhIJOephwaQSPRhqNpDI2Ff7QlMcPj
aQJNpOcs9xl6Fv4J+DtR+SbR82j5yV53itctkkyl6WAa/s6gF2gmzYIr/xaXFQ/l0Wx6Ef35
Er3s9b9cqlT6X6FXwT9oLnp9Pvyvo+8X0WL6p5LOowX0mgoto5WIX1AsrYwrSr+EliLVclqB
lKswetaWSCtTLsPXuBtj6hDtwWjbC98B2g7/AfqWztBZ+pEu0EUtQmumdaBrdJ0+QetnotVl
m+eov9n4O8Tb4uPQtp6WnYQWK94OY604sz2nqHbyxI1DyhfQG1N8nslT/eTJS6b25OXbXvKd
5BsVycw3nOeVFL138afMdL5tVrwFFylJ8diSLevrX3HPmFW0GryBv7IfSoY8vnX4wiUb6E3a
CJ/5tyjs8W2it+htzAX59A69R1toK23zht9FqCh+s5J40pQu30E71SjYS/tU//+LDirZXvi2
W7F7rZgdyn+APsAsdJSO0Uf0PsbOB4qj9DHGx6f0GWat/9A31gg6qUaQU4ug4/SpHkZfGIGa
wffRAdaVxiN8ii1ET5BxlgIjYwf079e3T+/UlB7J3ZMSE7p1je/SuVNcxw6xMdFR7dtFtm3T
ulXLFk80f7xZ0wb169UND6tZw1m9WuXg8kEPlAvwL+Nntxk6ZxrVjXHGpjlcYWkuPczZsWM9
GXamQ5DuI0hzOSCKLZ7G5UhTyRzFU0YiZWaJlJFmykhvSi3I0Ypa1avriHE6XB9FOx3btN6J
KfDPiXamOlyXlT9e+fUwFSiHQGgonnDEVM6Kdri0NEeMK3ZsVl5MWjTyyw/wj3JGZfjXq0v5
/gHwBsDnCnfm5GvhbTTlYeExLfKxHJWTxbp4zZj0wa6ExJSY6JDQ0FQloyiVl8sW5bKrvBzZ
ss4025Ffd1/ei9uCaGBaRNnBzsHpfVNcPB0P5fGYvLwXXOUjXLWd0a7aE89WxitnuOo6o2Nc
EU5k1jnJW4DmMmoGOR15NwiVd16+VFySbklsNYNukPTKV/Q2E+I9fkLdUEO8X2iorMvsbZE0
EAFXbmKKGXbQwJDNFNkgItXF0mTMPk/Mgz1kTK4nxvt4mjNUdlVMmvU7NquyK3ego15dtL76
rYlfxDtcPCxt4KAs6aZn5Dmjo812S05xRUbDE5luvWtMfsMGSJ+ehpfIls2QmOJq4MxxBTvb
mwkgcMg+yO6eoh6xHnMFR7mg71hPuRrERMt6OWLy0qLNCsq8nIkp26mxOJPfxBHyTmNqQqmy
Hq5KUeiUsJi8lMGZrmppIYMxPjMdKSGhrshUNF+qMyUjVfaSM8hV+wyKC1UlqqfwbiVSexLL
N7fX9HOksBCeKnsLAkcs/jjbt0JEELpLBWWPtm/lSNFCyJMMpVgppK9YPgjwmlEdZRSXj0Z1
DAlNDTV//qRKIVadjJouP5+8giDw1sks555VM1PLCtV2xGRE+1SwWKaGVUErt9LryWRbWAXj
CT/ZnR09UbwmvlzIGLJRItmLlR0uSnCkODOcqU6MociEFPlusq1V/3bu7uyc2DtF9bY1SpKL
hcz45mbIRaGI9gRYFMZgbESIp1tVuIMKe4MdS0THeaIdeX7Ozt3zZOZOK0Ny4AvCS9vC4tJn
N6/QBJ9mLGY3Z2y60xHkiM1L3yZyB+blR0bm5cSkZbWQeTjjBuc5u6e0ClF1TUp5LmSiLKoC
ddY6J7evVxdzT/t8pzYzMT9Sm9m9d8r2ICi3M5NTNjONRaW1T82vgbiU7Q6iSCVlUiqFMuCQ
AZlTEgJ+Kn3I9kiiXBWrK4EKD9qmkZL5eWQaDdrGTFmQR8Yg001ZpJLJH3RS5Sw0MabbGMdg
2T3PpmblpaXKj4sqoSvxq7k0ZxtyMWebfI3Zyrr8nRntXQHO9lLeVsrbmnKblNsxMLRKGhpH
zkl5aU7MUxhQKRSimUORyywd24RITgn9KORyaiiGWl/QO8VVJgJzv1GzE9J1kKRB3MGVOyhd
1oN6pMhn7TXjBqVi2HoyRJI4VxnkUMbKASli1TNyOOKhQegbdKB6PhcBV26qKzVCFpqSnaqG
c5CLOjpboNvNPI0wWVCD1LwKzkbq28Sn4F/zBemUQd2oe4opCUEQhaWajWQvi5oPciJqUJoD
ra3ToO4Y6uZc6h9iSjIwJephGQr/ECuS5GvxmgHl/F1l6iND/Ep/QH35SRo17ampZuVV6AUr
AcoOcgWgRmE+TWk9gNZBVJysC35fQFVl0v0ym8RtlOQcj5lFVlrlZEe0q1zNuHRM/ubzAZA4
m3se9pNzRICVx0FTapdvXhbtzmsmbxNrnRNCfX7q1XXKxUEOTArZjoFNqXklBa4+EfXq+pWU
llPivDy/cqU/YLaXXzmvC6GyKU070n/57Sa3A/yD/Uhb5GswPfCkHlgU0j4h0leII/eLLUSM
lui9KVmvT6NKYbR+iVIUgtpK+AVKAY0tNwq0BMkg3pKZbKIkoywNL4leQEkSI5JGM52SmC5q
wq0E9wlQD3QFXcA4yEPgLtHnIt0csQ2s1sPxPOD9UIZkoOXmkFPvTym2U8g7vBRQltGKRv4l
URQmsV2lkXp1lFWdEo0E+FPgN2klXb6UdBPxO1zNGz5Pq0Aly51vVKd594ueR/vt1eh0SfRa
4lPktRe0tNx4kMX3igvFuC623idbjL5itkTXKY6/SdmloWdQF8U4ai3huSg3l+pZrgNUA3VB
GIi05PE8gTroU+ipuxgLuWQJpWqXqIN2SUTBfQRuR1AL9ABJYATk5eHO0UOoA2sjXCCXH6YO
EnaG4hXnLfcXqslPULzNRrH6hFLIRJkLKe0v2UFxEuQzkB9AWQcoRl9JafxH+E1ilNuWmIn4
BVzxhlMpl6eKP+COBs/r0+m5EowqRabgl+lV26O0piT8mPiKT6IZoLzl+oPKPFv86otelRJL
0KIUmcJWhhpI4G/Nk6mLRRvQ1hO2x1IX2zHqYvxqop7NAVmgCSXwz9DP9wEbIVrbponWfntE
a/1NUc02Ff7d8LcqQbcSWHLb2BLMKoEl96YfB8qgjCifvKcW5aWfNTH8RWt7NfirUvuS8INi
d0kgb6uoQ/HaSWqrnRSSWyABhIDhIBH0BzNlGli6bTF+w7SfREsPfBXa2aStmQ/VY4+o/N7T
7lA7VkhtbclWWUVEKHeOuKbcEOpagoZ3yVqhf4FtGvxVxS0TSmR7qK2J+AkIXpXKmIhr4FdP
2FhtojcXEdqvogp7i0awg+AtSme7qI5+nkboY+4PoyKNsHemEbYv7w/UMwckWK5E9tNTIBNk
+8hz+D/oWWMbvVwSPk4c5/PpQaBZriSY1ybDgpQ7kkbwdJrMx1Nv9gVtYCdoGWtHa5R/Ba3T
9osb8K9lX9EybSCt1IaJi+w1Wq71p+V6F1rOToOTSHuKxoIN2i8IN6Sp2g+0E3H72XT6F79K
H7NnqT+bQS+z5vQcSyZiY8B8uWoX+hEVXGA975apOg4ASlawDAwpIVsCsjWBMPQCvhKsU/IM
kMZrIL8bkMWCIUq+HEzitRCOA09683iOl0X4AVBeyTaC9ewfeP51sFzJLoLvGXQMdgC8h7T7
wXfQOZT2UZAEHtMOQw85CT42wbvES9gYIZ//lj0vbsO9pN0UP7LHvPrKa1IH4d2xvk7DOqZ0
CPf7ck0z9QX3FugLI019wb1D6ghKD3hVHPOs92hjMtdwYVPPYO3mb4rr1jq8m593z4abbAtG
mVhPbUR7sa6XNRLcN6w1cYJcC9kducaIT8y1zP2pmlvVuuU+rOdTmrluuXdjbUpW69F3Yrtn
3eEvUIC5loiW+niE5RrSR9xS68JUmsqnulfBDTLQUnJeN1JoMfKsoOeLZKwBiYonMM5biJsY
1+P1hki3mhpI2IfUBPNuW8V4itTb0VDWiDJYI/E1mMgaua/KOYW/i7mqK8p8DWsKg57GqbF3
ThhKhl5B/BvPdkb/J/CH0U49aIxFNihjtMR834w64b3HGuvxbc2lnhI2S/WlP7+u+roZM+ga
M7THgY3VEPkYg+9rQlxW/RlPqao/c9AHkrHoo1oi20d3TLZlYe45Qhx6T5IHSx/sKnU9r771
g3jLdhucMvVGOy/S4/Q/zH6WuqpH99KbYw2XbKUDxnyzr41HoN/eACNpj+0aJdsfhf9nWmGr
DL02EgykR/V0yrGXQV4jxB3oucv1a7QCOiOpsXEF65/Uk4LRn5JaGA+5YpyPPlTXGC9+hhuo
z0KchaXj9JD6C/8Q4wHojcR6NV7GWjrJYvCk0jU6KL3Lo0csga6HL1NvAB3S3xwv+kvUSc9G
39ymRTYndbLFIDyAJhpTUbcL4Cz0sF9ooK0B8sKcgLjJ+iCagv4gm4ZyG6FMuY5HIU6OrRPI
Kw46HMC8J9egRL2pmnfb+67htk7iBvRsbs25co3sZq2BOWpN24L1DOgPil0oZ5eRTTb9caxj
4dZaVQ3UUetYplyHlI6BNUauc7Zm0JXU3Iy15zOMt1UoE3O33sGa3/dRukxjS4ct0ol6GcmU
wXdSJp+NdWoOdPODGPNHxTm9M8XLtVmvRUP4cLybBcbqaglbjPl4Mda/xTSMv0e3QXXQln9D
37M0Wgx68sH0NdaChhjHr8oxzWrQMIzzTsZ0isP4vgSeBwLMRR9dBFNAAXhVPgPd73W2hZ4F
E8ACME9/GHrgw7B7HqaFYCavIkawb8Ui/jZd4AWaH69Ix9i3dICNoo4gkxdgTSqgKvY2tBrs
8Li8QPSH/Czqsw5sZ8NoDBsmTrPRFMFGi/fZNMpk08RZFknDWSTW9k6Qd0J4GM1EuitI1wbp
vkC6CUh3E3n9Dv4DMkCM7qK9emtaDv9kME87SDd5U7ppYE0ysDbZbwKsG/ZWyg22baLDEtif
l4036KSxkWbjfQn1vKq/Q50hr4t8KsGthjkrGP6jiLsp7VX4M9EWzeHvxH+jGnwZPcL3QKdd
hndfhnFdlob61cO8gXawncGYLS+EPp/6sKPUn8Mu4JfEN3oPzNGnxJd6M5rEN+M7aIbx1Qzz
WyDmxkAaABx6oLgOPgKXEZa28jhQH+E/8A0MYHMolU/GOBpFFfhGzB9ZGIdbqZ+aG+X42EXh
qE8M6AGCQAgIttwEMA04QXXU70nUb45ZPyqH9ekBfor8rPpNsOrXGOXHF9UPNmsgVQZVrfqt
MetHtXkobdduYWy4aBrbRJOhS0xla2g6xsqHWJd3s++gp3wLfqL34b7PjtO72i76BDyNZzU8
G8xc4hjbJA6z0+IoWyM+QrogPGuw77D2fgt+onKQlWPHRQGee0jbJbayJbC7blBDliTOszis
LZ0wZmLFtyyRdOguZVkvcY7FYzwtwRi5QZtZEmWxOLRlJ+hPsdANE2kG0r3EetEQFk85LN99
jlcUbmMAyAYPWW59UWh0B4epv2IIxRtbwUrwEQ0ynsM6tBLUEZ9Dn0v360rpxmQaZP8IfVag
GAAag1YgDnQCHUAvUB1wH7oaF6mublBH279pJvo+gV0WIyDvKfUNqQfINdOWQSv0ZLFXr0RD
8c0tAgvAYUUgvW0P1Fp4XP+umIOb0zLYluFaHnSdrzCnZv63aN3+zv6NxGfPxcEviAJwEVwz
oVZYUx8E1f50z2PaPfDsTRyiJaVh7UVUk26RfSl2grlgGzhlyX4Gly1+ljKf9aUh/0ycBuvA
l+ColGN9CQN+RTYNdMEQsdVyf1KyqXcRp1yPfbDTS6rlxkrXWm9OS1fPFAfR9s3/xt6JiWev
I1f8AraBjWAP2AV5eaz9ZUBFn/2FaNAMxAFz7T99D6w9AaMczSjBEOma+wBYL+He17jbj3Xl
G3qCjaBQ8KS0Z5FPssUUfQbqZjIUffkMbLxaWNMel3asr43ua4fDtqwGQiW2sUXA3ujOfqQd
0KOP8s5Yp9YptvFoOsH70AFtDf1LO0ot2BnYRn3oQ30Y7eJjaCc4Cjtrv+Xuw3o8CnPIDuhb
e7mTruoxdA62cQZs169gg8yELvq7RM9k4y3KSfh+LQjU52U1J+gMGKgjbQ0QrgktADQGYSCa
6M51CdtAVSxeB0dguzzkIzN5Hrbg8xTKa7gvsH/ALsjU2rEN4g2witd2nwDneVn3KV5W/MAX
wa3l/hlrXhpoxxdB/1V7t4Kj3hM99QefWERIUG555Pcu5ukIuKvZBq2ihC/SuoBJRO5/WrS0
aCFB/V4Ee1BWR/T5UfjjkN4PhPFFBef4osJyqMNt1CFCh46ma3RT1gZ5R4KRKPeW9rFWFnbg
GbSXH56PBjMl/FfKteL9LbsuHPIEnk81zPbSbPa+You9L31t76s54e4AByFbYTtO/7Yd1wyE
88EPIFL7lvaA/2g/0gnwG92iQ+Ass9OX4CYrgz4ug/KW0DHwE2THwRXIjoKLvAwdAz9pA+go
uKglIZ8k+k37F30LCrW9NBe4oKd/x2tpZeB+CmAhilC+W2ukV8G4rYL1uJK4hrn+AfiDTKCf
VKFgtM9vaJ8guHfgVtYGiLV45wt4/4qyLfRDWDekjSNth/rCrfbKBbWFPdcT9kgw5t1w/Rjm
tSMUxTeJ1mrfO4/GsgSsh9EoN5wSbG/SAiMccZh/oa+Pgm7fE/ZOV9gxD0m7FfZGT2nPYG0a
LOdgNdfKPd4j0JGOoG9PUZjfFkrxq0IptkcoxehAKfb3YB9VgA2DdQF2VAs1t5e2z+yz/+/d
lw8vsqtkGZ68ZZw9HHP45+Qv7eyS6w7KOcd89tY9dpunLJmX2u+vgDyg7+AdznmeL7kO4R2b
Im482rQX7wcb4bxIwhz9pd5b3EFedaW9j3WtkbQPUS9ZVjieqa/qJM8wFFh7fM8tLmF+N93d
RWulGATq+Z5TeM4lTMQc8DnT3ZXku3nOHPRwscw6d4jk/UR3ECftUg9F5w3iBrhS8v2s84Qk
n7OERD1FrCk6S/DB3LdYpdrgvGhqVBc/g3fAWZ/zghzfMwNp63rPCorOBWJQ37b8gKirN6ZB
KLONEYyyB2AN/h5r6ViqhDawQ99NtPbZWkNfV/vCau1uiPlc7uE6oVc3EH/wVdAp2kE3f1ds
UXsR0jauCnuiKlVVe4QA80Ky2ltbR/48He2eRTb7YJS3D/aeXdmBcp+0l1rDq9JQ3/08ZfN9
hnHgs1ft3ZddRQ979AG+S+yTtqfM14pv63nGo1ugjB3STvU849n79JaDPOC21NeosVlH1tnz
fMn9VIzDimwAvsv11JrNokdsmaibfKdkMQbv3kS973xaDP1lm2ev19xvFQK2cQAfSYdgF5Rl
QlzTfkO4NgXor1GetEvRfvu8bV9VDPa2vak7jbTcEUU6k0AdRaBnf12u6z5tYIHvqCrs85OF
hSYYA969ZzEQbXMDLNFOujuDhsoWTy659yyywcC79pat/WRrH/kGuM72uC8V7SUXgfGQbI4L
9xlwUtYJyLwnFO3hilO++7hq79azf1sbOq3ar3XfwDNPsrfEGpVG6m5yHMm96XbUCnHLERem
d8TY/QpE45kD6kxDY1egEz+Mcd8S7RoPfRVjVu2XvEmB+Fay1fnWW5Dfoieguz2qZ1A9nkft
eIJoJM+t+GVKwrz9FPQ5xg9TrK0/9LMJopXU4Yyd0Nf88ax5LvSo2u8bCDcV60S+ed7D10Jf
k+c0T5GNz6MWoJL9C+riNx1zYG9l76TY1lKsPQvfFXRL7ZIw9cPSzoks/VOd3VnnaqhTE4+e
yZ8Sl+0fI+8emPMQZ4uCrjkcdrjcnyyhu6KcL+UelfdZ65zLWxbqq/apFlBHvhs26UK8g/V8
ybMz6KJBiEvF2rULul0znioyuNzD10Uh8nqUXxYnoBv3kXthWOtkWTXwTC1pV7MCcQvfhJ23
Iju+iWFyP0aWI/fcTER6sfPIDMzppvuxjx7ekee6C+Hv5D1/9Jw3KsR08Ix2yc3kO3vOEvlh
McQ8TxRfghDwkNyf81B0jijWgvl3vfcBa++u6IzwMf6jmFh0RuiDOh9UZ4TEU92/6dPFEjAQ
vORzDviw71mgOv/znAEWnfdVwbu8iLxIpZlEWbK98B6V2Bn3Qqs+j8n3Vu8o+02O9QTMO1vR
Fq1LOX8rhbvO3krhfs5/7uvcZxqF+u3BPPYm7Iip8O9WtoXHxvDaGno3i1ZeZFw12B73hTf9
OFCGqvlFFclgO3rz0s/CZvY3wdpazae8YuX+3TrwE9BNzLk9Esj5ycYXW/N9E6wnLmkPY/0r
oKZq71/uu0aCMOpqrSnmOWUqdeNLaDw/Tk9a86ias60zyVvybEDO+exHAZQtXRf2nZzfx1jI
OdhQa04X+KtRV6Mf6AaaUSfM6V/5cBNzfV32EvJ7iZ7GXB3ON6KeVcXXqNPjJtSM5YkWmOsD
QCdl549FPePoeczv54xt4jJs7nM8kUapdZYwP2P9BX9IHQ/sAFXwvmWVLngCeYRg7cd7yr1k
5J2BdesC5vEYtUbPx5jHM7ZeWIc/pkR7fbTfZegen9AIYyK4LuScPlzPxrp3Fd/AVcyBVWmA
hJ8U240HxCylW1Sg6mq9bULtUNYT+E7byzZHG55ntYQL79qa/ULBak+7ObVRugD6DHpAkr6O
ukPfK4ex2xQ6ThDiUlX8OpR5BOvAEeqD/AbrT9BEzFfM+IDqQWf4HPKXbYE0h3cTV3kDtIPc
gz8Onf0ExgPqJvfKZR5GA3pR7qlLmxp2R6qyq3+kdT529az7sKv3Kpt6M62U9rWyrS27WtnU
G+kV8Ll0+XV6k52j98AbbBu9A1awcbQGvAjZCm0QPcleo5V6T8hO01J2nt5mXWkS3K3Kf46e
0X5AHS/SAcRPR7p9bDp9yDpRLMZPLoulXWwq1u4M2skGUDNtkPhJ+11cRPpApAvBOPsMacqx
c9AHMsgOfWumrRvG9jLMk8ugS30ubLYVRPpcYvpSdx6v6r7Frrtv8anQMz4RDLpCPX5QvM51
2gz337ZUGoF+vM0aidsYj6+gTewKOebbYwzVg/3VEf19ldpobnHc9hy+g1j1HdlQl2t8InSY
suJxqZvw/dBHWmHcPotxtsv6VqUupr5R8bncx1I6Vqo4xRqLSfpE6DWNsaacoy1oozcUm8kl
21KeKWv76SF1roy20ubSEG0D7UL7rlD+c9RYgy6pPQObsQZtlOfMYB87L/5AO6/D+62U7c2b
wfZuSMO1YeJ7tPsC5DUSffYK4j4FX6NNu7LHaTybD9aAkdDlz9MReZYNlsuzbO0XWgp6Mg5m
0xvqrHoGzdIO0mrehFb7nHu8aO0BBLKFdBv84Nlr1TvjG+1MP7NEbZw6x5bn24kYl7XcX7Fk
9x3WEzyBugLkMQLIfYUpJejDNmgBLJ32av1Rv4Y0lT2LMS/LCaIFJdF7FQeyKLj3okFJkF66
NUsCeRW4dwF5e7ilUbIe90rX/k/qUZo8DO5d/Lf1+JN8nXDv4k/q1xluadxvPe7VzjXg3sWf
1KMr3NIoVg+Mr4ES2BF39EWavzy7QzgeNAW5in/QNJYM+2u/+t6z+SL3CXx/W609QS96pJgB
lnIGvbgWbQKreQ3qi7gN9gr0NVjDvhDX2ApwEjwrVsB/RvtSC7QIl7BZWnOLcRKiwn9KeG2t
cjFqaIGK2lpzi4YKj/y6FlCMGnRDIe95lCXShFZBcle+tbVG4DGve51Wgb6WGwcdog57nuqo
vQt1H9Ta64ILu2m53tP9IdxIvokSkWat3o+aGfOxLq6k51W66pgn5V2GMdSTj4Ht3A62/ilq
iPUyFutumF4BtrN538xmuuITdfdgPOZruY4uFFf1XfCvRH/EUYKp/4gImYc8N7fuKQaaLnTk
NErmaW6Np0HflTbAS9Sbfw/97Hes/7cxX59W+nqMtYc1EvT1OUuZC0b/xXnLPZ+xtfIyEvT1
Cc8Fo6WfXxDndJfIBCPgF3BngFnwvw0u6wXignFYZBrvixFGmtgEHZAZB8VkMBPhjYjfAC5Z
e1QXIE8HOaWlteVTki1fXLBPEOkgx/6g2AQZg38ymInwRqaLH9kxkQFyWJYMw1Y+JqaDmQi/
ifgN4BKIBuONVuKyTRcvgBHobzvctWAW5MdlHPqb8fNik1FBvArW62+JnQj3BusxTqrLe6tG
AvKoiDzKI493xWYjAflURD7lkc+7Ih/xJ8B1827On6e1/U5lbb/D3t0uXrBvFSPsvcVmyOwI
r0V4FsL53ns1/4d47ujcC++9nb8mAlT7O5h3gP4M91Wp/8DftUgmKgOERb9S7hIWR94XkhTd
E/r/wnOP6P+Cv312d58YOX9N0f5D6RTfg/jvMc7+Nea9oz9DBIHrJeSPQdYd5PzVPWnvnofc
k5Bz7v/erYg5/BLcMLjCvCP3v8NW+6+5nznfOw975uwBco4uPg/f1zw2B+tEhjgMRoK+4IjF
XDBa+Q9hPj+E+XyeyLS/jLmuNub4Q5jPX8J8/hLm8zpio70KlbVXwXz4NebD00gzSWyGzI7w
WoRnIZzv0T88egdfpNmL6Rke/cJXr4AuIZ/jtZCmrNZAnoHCPogG8SDKqE4JeiRs3+rqvl8d
rPOJtjfM+336fHnGYZ13FNAKefZg5MNebwad4WF6Wt3dM8865F2CfnqOOGK8S0v1WbRH3tcD
icY7NEQiz2LkvUF5bmIEireQX6IC6ex2uD7nWvwCwsegJwDPXUN5FuW9b+h7LiPv/3nuDUpG
0iC8R4K8H8hzsN6iTupspTq1t7UDLegb2PTf2M6Kt+whqIs8QwvGOxxBW8h6yT3tL2m42iM/
Ia7wZdTWc4cOelVr7325aOql98e8/wVs/V9hk3bAnAE9yDaOWvElsJOX0BN8s/gA8tb8HKXL
u3Cgtb6WIiUqz08QDhW75B6J3kbdOU83smE7y3OrqngX6wwF9mkz864F1THrAvvWPP/IUXer
Pff0AJ8trsvzDnVfWu7B74MbR9Xk3Tu8z79Rp8Pqjp7Muz7efzEt4Xtoia2K2GXriHrIPZvJ
+I7l2heBus3CXCH32w+o+5OP82PU0XCZ9yX51+peZIy6GxmGOr+Bee476mDrrP73opfS7eSe
qfm/D0/xi+Ir/ROqKu9ASvQySH8I6yaQ85i6h4n89F7QP8Yiz4VK91tkq1m0/y33zlF2e70l
1ZVYdze52u/23N/03M2UeuZZehR9UQc0A2HIL1reA1X3LoPFRX7N2qM9T2HGWKqO8TCFD6Ep
xn6x3lZW7Z8/pXfDOwyjRvpo1IuI/Mi8Ny1d9jaQ/7/VA7IEuLvAQvXvX9aP+A+oqQeSJAJU
lPcBpU3OU2imx1ZH263GO+9E3HU2isrpV2i653+5oKPreC5A7vsZ4RRuj6dkW1NKtlejcOMG
9dDDqbn8Dv3WUTh09rf0KRStb6aJ6sx1E9WWedhCaSgYboyn88YSOg/bP8Su0S64rfUk7ZSe
hO+VxO9QI3ebePzid3sZWqj3pfXye8Y3lqQfFz8aA2kOP0xpqNMwvQEN1iuLHdDbm+gB4gzm
kCweJk7DhlkHlklYsva0RbJiA3WR6GdolP06+du/p2D768TtQ2kkvtFEIwBz6lq4H5Jubws9
7YjYKe99y7vBfs3Mb1+mlcj3MzLpWYPwXTYWB4234eaKA7YAfKsDxR55FxrfTro9xtSLbO2p
q0yvvtf1lGbsQT9D3zS+hXtZnLL1wLjLFT/IO968kF61/4o0IXjXdQDp0abZ/ANllx7Xe1MP
s4/difJ/+GBzBmsfoP8H0kp5f85/Of1HP0Fz2QmaKoF/M9wcKf8rYE86MYCWwf3NdOX/CmAu
X6R1wBxf2SJZySw/60lnrXWgr7wvIdvYSGDlMO8/aaXtgDQvIavqIM6iLeJ6gIfu7dJ74FWk
HQ8m4Q2bg/Le+sRqEZDXgP29mj+gkQwrFmmP8o5wJSvhB2wMXeYDtM5IPwY8A5pZfg+LJbBD
JoAFsEWWwQ5pABZgnLcBPe+l691L37LmIMW99Am082OyzbW8wslwU4kKHgSwxO9cgRtaFC6o
BKqB1gCfegHasKA86AQCQEsg79zL8C0T9yxwCASDrpD9gPjaAK7bAXcnuAm6gZchGwyWg6fA
WqT/2sT9KMhGGocl+8biKzDDvJ90Z4H5Px+FmJEK0F8FYyFD+XeeBci7AP14pwOYA94As8Fp
yFfgGeRdgD4oOAvQN260i7sLGAVWI34a2G0+o8rEixbmgj0AeRWekP+TArYgzYdw/8BzKUC+
UxrA7Fj4GjiOuGtw65kUDEFcH4C6F/YEqFuBkP8LAxni3RlEt5siz75gPog33+l2E7gbwRkr
Dnnfbov0ZUBHEAJ6gTxwEASa7e8OAp2tvIcCTC/uKLMv3P3N8gs/gr89QLu5kbd7EahmxaOv
3KhPIWSFXwD5XicB2qwAq0LBKdTlkDV2kE/BDfjPwS1n/b/NRGvcjMAzckygP9y5Vjt4GGbx
uMVzJgXDTQrfsTht8YbF+xbnLDzyjBK8YqLu2cuxlmBSuAb8BPaCK2bebix5hWfNdiuQ/wf0
juW+C3kHC7xXYT8TNV4kA00KW0vwDef9P/btPDquqo4D+L3vzZbZ95lkkrxJ23SbZu026ZZp
006X0GzNK11oSpqdpk2YzBQoTVtAtMimiIoiiyAiDkt6aaEsSlFcodQVtVgoIohipCC40CX+
3nyDRz0ej3+4HPEl/c7n3t/73Td3XvMyPc0J/q8H0X7eJT81dt5f/b7e+O8C0vfAA//NGIbZ
CnrfHWRdLLA/Tz4k7RTFi5RD0iXgYlFsIy4CO0TxPCID0mgZEsXziZQoXkBcCAbBgCheSGwH
27CgH2wVRYuJC0CfKFpC9IqiOqIHdIMu0Ak6sGALFrSD83FsM2gThcuITeA8sBFsAOvBOnAu
WAtU0ApaQDNoAo2gQRQuJVZjdg6oB6vASrACLAdJsAwsFZGVRJ2IrCKWgMUgISL1RC1YJCLn
EAvBAjAfzANrQA3OGQdzcbI5YDaYhXPOBNVYVwUqQQUoB2U42Qwsj2HddBybBqaCKeicDEqx
YBKYiHUT0FkCokABxaBIFDQQhSAiChqJApAPwjgWAkEUA8APfDjmBR4U3Zi5gBNFB7ADG7CC
PJHfRFhEfjNhBiZgBAa0yJhJgAOWg4+Bs+BMbgE/jdkp8C74I/gD+D34nQivId4Bb4twK/Fb
8BZ4E5xEyxvgNyiOgl+D18Gv0PJL8Br4BY69Cl4BPwcvo+Vn4CUUT4AXwQvguAitJX4Knheh
c4lj4Cco/hj8CMXnwA/BD8D30fI9zL6L2XfAURSfBUfAM+Bp8G10fgt8E8VvgK+Dr4GnRJC+
L/GvimAt8RXwpAhuJA6DJ8CXwZfA4+Ax8CjWPQIOofgweAgcBAfAg0CA/Vg3gr08gNn94D60
3Auy4IvgHvAFrLsbCz6P4l3gc+BOcAf4LLgd3AZuFYEtxC3gMyLQQdwsAp3Ep0Wgi/iUCHQT
N4FPgk+Aj4MbwcfADSLQTnwU5/wIznk9znkduBanvgYLrgYfRudVaNknAirxIZzsgzjZleAD
6LwCZ7kcyy8De8EesBsMg13gUrBTBOh7Mr8Ez3AxTn0R2IFnyGAvaTCE50th+YVgEAyA7WAb
6Adb8VIuwPP1gV4RmEP0gG7hv5zoEn7ta7dT+PcQHcKvrduCYrvwJ4jzUdyMYpvw7yY2Cf8V
xHnCfyWxUfjoTZhvEL5iYj1YJ3xW4lywVvjobZ6rwkfv77wVrAEtwkdv87xZ+OiNnTeBRuHV
dt0gvEliNTgHxXqwCsWVYAVYLrz0vsmTaFmG4lJQJzzLiSXCo92Ui4VnHZEQnvVErfBsIBaB
hcKjfbUuAPPBPFAjPDEiLjwziLnCU0PMAbOFR3uiWXiimaBaeLQrWAUqhUe7kBWgHHspAzOw
pRi2NB1Mw5amginYxGRQCiaBiVgwAZ0l2FIUm1DwfMWgCJ2FIILlBSAfhNEZAkFsMAD82KcP
T+QFHqxzAxdwAgda7JjZhHsTYRXuNiJPuDcTFmAGJmBEpwGdMooS4IAlxsgx6jtLnqGcppyi
vEu1P9LCP9D495TfUd6hvO3aovyW8parQ3nT1amcpLxB+Q1llOq/prxOx35F819SXqP8gvIq
1V+h/JzGL5M/o7xEfSdo/iLlBcpxyk8pz1OOOXuUnzh7lR9TfkR5jvJDqv2A/D7le5Tv0vw7
5FHKs5QjlGcoT1O+TfkW5ZuOrco3HP3K1x3Tla+RTzlmKF+l2ldo/KRjm5IYO+y4QHnC0ad8
2dGrfImOPO6oUh6jPEp5xH6hcsieUh62DykP2dPKQcoByoM0F+R+6hmhPEC5n3If5V5KlvJF
yj223coXbDuVu22XKJ8n77LtUj5nG1bupPodlM9SbqfcRrmVcgvlM5SbKZ+2lSmfotxkvVv5
pPUu5RPkxyk3Uj5GucHaq3zUernyEevNyvXWW5TrrLcp11L9GsqVcqnyATmuXMHjyuXqXvWy
7F51jzqs7s4Oq7ZhbhuODNcPXzqcHX5+OOE1WXepO9VLszvVS9SL1IuzF6mPSlexbmlfYoG6
I5tRDRl/Jp2R387wbIYvzfDKDJdYxp2JZmR7Wk2pQ9mUylJNqb2pkZRh/kjqREpiKW49NHb4
wVSkOEkmdqUc7uSF6oA6mB1Qt3dvUy+gDfbFe9TebI/aHe9Uu7Kdakd8i9oeP1/dHN+ktmU3
qefFN6gbsxvU9fF16rnUvzbeqqrZVnVNvFltyTarjfEGtYHqq+P16jnZenVVfIW6MrtCXR5P
qsvoxbNCd2G0UHZrG2gopJ2wCF9SGUlETkRORgwsMhI5HJG9rgKlQJrmyud1jfl8IH9P/vX5
sit8NCwlwtNmJF2ho6EXQ2+EDL5EaFp5kgXdwWhQDmivLbi6NZmzdimsmp17rauDEycnXQHu
CigBaZkS4MxzwnPSIweecB91Sy4Xd7nGXFLCRe0up+KUtIcxp5xwVs1NuhyKQ9IexhxyMOGg
inbGKfam1qTLptgktdbWaJMSttq6ZMJWVplkMo9yzribkC3aLnhASdJ9/WCQGzm9n+9vXROL
1R8yj7XUj1iaNo7wfSOla7THRPOGEdO+EaZu2LhuP+fXrd/PpbrWEX998wbMr7z2WrakqH6k
aM26kduL1teP7KVBQhuM0YAV7Q+yJetjbUOZoVgs3UYPbUPpWO4PzXhGm8W0ovZnKE1z7TOT
m7PYP/xAG7F5iD7S7xXTsffnB3+fvq5/1Ud4cxtjzKj9j458zOhkMjOz+Uxla1njwbJgWdCy
YLGVj7KVzMw7mcSi/BpmYZx3JrwGqXSuSW6OODyDzbx5qVlqZbXHXzi+6YXjR8gjvOL46HOj
7jPPjXpraioqqiq5p8STi98pmc0m08QJ5dLcuXPmzJxZvUiaPatcmjjBSZk8e9Yiae4ieWZ1
sZRrRWeuSs1aVT52eqPceMYkXaos294wSVIiTr/dyKNGJWRZ2Fjuc5XMnjo1UaGYrSbJaDFZ
ps1bOmFp27yCswdls81sjQaDBU6jwWy35EXzfflOw9mk0fnuW0bnqTpD/6kb5apZPS1zjDdZ
LZLBZHo8EiqdnyzJj0V9Lp/b7jT6gl6T2ee1TV646szVllBByGy1mu1ua144HLTkWU1295k4
k8ZeY8xgMPrZRDaF1SXCpa7JzoJJRU7XlEnmIuekUleByeBvmTKZ/h1xwNAqt059VBqWdrN1
sVht7Wh1rTdUwysOP1lTU+2ZqX1WVZbSZSjJXRzDXJ67OoaQLxgM0BXiE3mJ/I61JHy6OxyW
ZdkcKpCWm9wFU6KBkrA7z8jvMhtko/Hss/zMm9KtZYFwOGQIBLy+GRUGn81pkbnBaLGbT52c
OsVuCeWHDbHTldqPuVbwA1KNtJAFWOggs3lfttAe90h7tT1WjPKKI/Q36nca3tvUzJLqoFTD
TRabx3p2k8NOF97usvE7nTap0OQPhfx2r9foC4V9Nu/Y2HtXRzJJs/784zTGm/To0aNHjx49
ev63I3n16NGj5/8s2/Xo0fMfz249evTo0aNHjx49evTo0aNHjx49evTo0aNHjx49evTo0aNH
jx49evTo0aNHjx49evTo+fthTnY/Pcq5X97uzD1qYzPbQTM+/kvd1ezY+FhmAW4fHxtoXDI+
NtF4zvjYzObzeu0shjyqFPIPjo8l5uR3jI9lNp2PjI8NND42Pjax6ZKBxpzGtB+pfHxM+5Fu
YPewKO2lklXRY5StZn2sg6XYABuidLM01epolGKDucd2qvTRaDsrpyOLWT99RlkL1XpYLx0b
ys26yC7q3kGPndRZR+v6qWcL1fqooy/X105J587ZSX3byBTbSjXtebUjvVT9+zvqyc0ztKf3
ujvIbTRvp5315Z6//J5odWVVdXR1X0dqYGigOx2tG0gNDqTa030D28uji/v7oy19Pb3poWhL
11BXakdXZ3l9Q3J507JYXXt/35ZUX9nKNA06/vni+CzaNxRtj6ZT7Z1d29pTW6MD3dF0b9df
7KMnNZAZ1ModA9sG27f3dQ2Vs3rWwJJsOWtiy1jsb66Xdj176NX2567QP+osYyvp+qDS8W/p
fN9+tdCdQXeaq59HmZu9RPeGRFaw8xnLG/VIdD/x3J1oPNRyf3JH72bXgndYviV3az72+q5n
NJ8+dmjfu7POPG31Wwppqt2buXv3TwIMADQ0daENCmVuZHN0cmVhbQ1lbmRvYmoNNzg3IDAg
b2JqDTw8L0ZpbHRlci9GbGF0ZURlY29kZS9MZW5ndGggMTM0MzkvTGVuZ3RoMSA0NTc0OD4+
c3RyZWFtDQpo3rRbB3xVRfY+t70XQot0CMILj9AVREAEhBASCISSEEoSWgoJoRdpgiUCUgJY
MIioCFHXgoAvseHa0EVFcZV1F8u6ay+ooKDiLpC8+/+mnJeXR5H97f4DX843Z8qdmTt35pyZ
CRlEVJuKyaJuozK6dj/1z2c+gOYFICd/8UJf4N797xEZLYmcloXzps3+7bcRdYg8vYlqtZg2
67rCH8rS8onmId7sVFSQO/XoJ90/J6q4Hvl7FUFRd3eDAqL6YxBuWzR74dLR3Z77EuGlRP1K
Z83Nz6VWV11OtCAF4ftm5y6dFzekXTzyT0R635zc2QWTfvv0HaI9XxFZS+YtKJg38wkzSDQc
dWgbQ5bd2bidHIpytjpXopatlLQO0WqTosis75imaVum/RmZbgLtclGqaC+NyPD5KIEo6Hoo
SMZ+7/1mOx8Z20Wc9axTTzwdPULe+5HmTgr/SaMZdC36q5hW00a6k16mjymPVoJtpR30MD1G
AXqF3qQP6H/4E7zOmU11rGfJQw2J3NPuseDDwF7UtFpzJ0INbV+1xo1xf4zQ/Ri8040J7vU0
oGiZt675HrS/GFXuaXOACLu9RNhcA15f5jjhvT/4RPCRiD5Ip2yaQBNpEuVQLto/lYpoOnpm
Js2i2TRHhuYgbhp+FyI0BanykUrw6lRzaR6wgBbSIlqMf/PAr9UhETdfhhfREvxbStfRMlpO
19MN+vcSqbkeMctkeClwI92EN3MzrZCMpdKspFV0C97aGlpL6y4YWhdiJbSeNuA930q3nZdv
rBG6Hf/uoE0YD6W0me6iuzEu7qX7IrRbpP4eup+2Y8yIuM3QbJdMxL5Ar9PTtIeeoGdkX+aj
11SPcL8Uyj6chz64Hi1cGVZj1X9LQr11I9ou2laiW7oU+hVhORbrfhQpVyKlKkW9B1HKDRE9
cTvaoHh1i1Ros2x/tTa8Vy6k5f64L6xn7pUhwSK15+N30TZ8gWX4LXpVsAfAFdsuebj+/lDa
HTL8ID1Ef8C7eEQylkrzMPgj9Ci+7Z30OO3Cv2oezpTcQ7vlmwtQOVXQk/QU3uQz9CztlfoL
xZ1L/6TWV4Q0z9Ef6XmMkJdoH2aaV/GPNS9C97LW7pc6FX6V/oSwSKVCr9MbmKHeooP0Nr1L
ryH0jvx9AKFD9B79lT4w6oL9hb7D7yo65HxF9Wgg1oA/op/vo8k0OWHI1CmTJ02ckJ2VOXZM
xuj0tFEjRwxPHTY0Zcjg5KRBiQMTBvS/pl/fPlf3vqpXz66XX9alQ7v4tv42rZs1uiSmft3a
0bWivB4HM7NBXZL9g3N8gXY5AbudPyXlMhH250KRG6bICfigGlwzTcCXI5P5aqZMQMrCiJQJ
KmVCKKUR4+tH/S7r4kv2+wJ/TvL79hrZ6ZngG5P8Wb7AMclHSG63k4G6CMTFIYcvuVlRki9g
5PiSA4MXF5Uk5yShvPLa0YP8gwqiL+tC5dG1QWuDBTr455UbHfobkpgdkvuUY12qKx4bsOKT
c6cG0tIzk5Ni4+KypI4GybICnkEBryzLN13Umdb7yrvsK9mwN4bycjrXmeqfmjsxM2DlIlOJ
lVxSsiZwSedAR39SoOOyr5qhyQWBLv6k5EBnPwpLHR16gBFw4mP8vpKThMr7jx2tqcnVGk98
zEkSVDQx1E2IZ06oG2qI9sXFibqs35tAeQgEitMzVdhHebEVlNC1c1bAzBEx+zim8VgRU8wx
oew5/jjxqpJz9P/FRc0CxXm+y7qg9+X/ePxHvC9gtcvJyy8SMregxJ+UpPptTGYgIQkkIVe3
Nbm8W1ekz81BI6aLbkjPDHT1zws08ieqBFD4xDuYnpEps+hsgUaDAjB8dK5A1+QkUS9fcklO
kqqgKMufnvkcXel+Vt7DF/vkldSDskQ9Ak0G4aW0Sy7JnFoYaJ0TOxXjs9CXGRsXSMhC92X5
MwuyxFvyxwQ6fobHxcknylxoW0RqTixa7o2P8mWasVaWeFtQ+Abjlz+xHyJi8LpkULzRxH6+
TCOWOBmeolMIVqMcBKz4QSkiyhJZB6XExmXFqZ8LVClW18mJD0SFlRUDRahO6jnnrZpKLSrU
0ZdckBRWwRqFOrqCurRz19MUfaEfjBxR4nWmcJQVjy8XOhPFSJV4i818AUrzZfoL/Fl+jKGE
tEzRNtHX8v2mZvhT07Mz5dvWo2RMjZCK761CAYpDNAfMQRiDgzvH8muV4SEyHAqmREQP5Whf
SZQ/NaNEFO7XBZIPXxAa7Wk3NHd97wY98GkOxuzmH5zr98X4Bpfk7nWL80rKExJK5iXnFPUR
ZfiHTi3xZ2T2i5V1HZ15Q+wy8agGlGqkjkm8rAvmnsRyv7E2vTzBWJuRnflcDKzctWMyK0zD
HJSTmFXeFnGZz/mIEqTWFFqhFAGfCIiSRiMQJdPHPgcLuljG2lIhw/l7DZK6KNYZlL/XVLoY
1pnQ2UqXIHXiBy+pWRG6GNNtsm+qeD3XZxWV5GSJj4ua4FXivxEw/P0pYPr7lxump04g2l+Q
GKjtTxT6AUI/QOk9Qu/FwDCaGOgcMSeV5PgxT2FAZVKsoYaiJYr07XXdMZlxf449lhWHoTYR
yM4M1OqMud+JH4Z0QwRyoB4SKM7PFfWgsZkirzd+aH4Whi0XiCRDA7VQQi1dAlIMlnnEcESm
fLwbvECZvxiBQHFWIKuzeGjm9Cw5nGMClOLvg9euynTaiQd1zSpp4O8uv018CtHxa4SohbpR
RqbSxCKIh2WpTvLWQc3z/YjKz/Ght23Kz8BQV3NpdKzSFGBKtNsVSETH6kgSzbLia9eNDtS6
HAXiv+C1LxefpBPvzcpSlZehNToBnh0TqI0atQvrSp0BvYOooaIu+L8GVRVJXxHFpO+l0f6l
mFlEpWVJXkQH6sYPzcXkr/LXhsbfmzNHiTmiti5jv9J6RcvroN+t+DF73Uf818WF/VzWxS8W
BzEwKfY5DGzKKolUBCZ0vqxLVKS2rlSXlETVPXcG1V9RdUNSKH3JWDWUj6n8yugdZ06f3lHr
qPI6q3/qt7XrVYeMd4nsMvJfLDyx7tsCdjbtspMo95w4irijtMV2KVbAOkK7gGQtB2vkA1OA
m7V+l7Wbdjl1aEIk7EqUBzgJ5DNt2mXa7jDIDpBXA1cAacAoYDn0rYD29iak20hec6P7mN0B
+QFrksTNVp7m86ilPZl2eT5A2Z3OAS8wnPJ/F6MUPD9Rvt0GzwKcPPBMcIUMIdG+IRqNgWah
8DdUPxxOG9p5sbBLqI23FV0TCbs9dUNZrc7Cy9RXo4WUv1LMxcKZ6H4hYNtUZh2k2eeCXUBl
wAx7CXUXsIqRthh1UdKn0QXoCCRqfZmVhnwraNZZWAr9Utpgb6ME4yiVGUfdTMjmkClAe2As
MBqYD/0lQDM7lsrM/kRmf3eD9SbKBszPJNaY32h+HHU7TGUeD8q/I4StwFLJC4GdVPi7+KMC
yim0XsOzALsc/Bi4QrKUo2iognsS+C0UzqKWVpYbVBLjcSNtB+7TcguwSPOzYFVRnKc/XRUJ
623qZa3EO4vEdErSiJLyME2MQKtz6CQ8XRXsHrQV30+2xkhgPIe9cynb80/AUEDaHHsDMAPo
QbnWGZp0MTDnU7znHoqPOkzx9uPg92reLwKjIqD1nsURWBcBra+RvhaeMSis7JXVcfYxBach
xXs7ULy1n3pGQrb1bGy1e7i77UHuKeN9usV4350DWR8yG/ABC4BMYBr0lwBbrX10i92K1hrf
u4c18q0HodcQaYBOZkspU40z1NKsoq2eqeJZNTBSygfcbVL2xvuoiVFn6fopeN6W747LyTHf
oq0K7inIOVYcpStg3Ma5VRx29iigrK3GCaTfQ3HmfkDIF6id/Q3F2YsuDujrOG8qxvdHFwfU
sxS4VcvVwAhgneal4bC2URtnL/WMhLUEc9J2anMWOlKWhlfK3rTAyqWp1lKM1V2UZH5Ns8yR
UqaYe2mI8Qq1NbfgHX1Hs4x8yjVmux8iPMuYjPlsHNJ+I5Es8yGP8RtkN0o0viS/yGPeQq2t
n6iLeSPWuNXU2ryKEs0xmM8WAaVi1a6KIqo8Yo47W4f6kTUFkLrK7cC0CN02YLrhInwP8ADw
qNQXADlWW5R3ErrBwDSp3wHcaLVHeCgwI1TGDVYdhOsDl0jdLuAx8w7kvxvYIXXfAV+YsDHM
V4GnkfYV4HPYHNL6qBwNXGG8AzvkfeAdBbRlhADatgpymXmTlIuNf9Eq8wq2V9x1wgaxMrC+
rqI+yoYIviHWNGUvBO8Xa7OyF4JwE9zR0g7YTG15vUcfZ6g13G0i82Ddth6HbaLWYayXwTlC
ehrimVhPPUS3O2k02UkLnuI1UayF5hm5xvhDaxnmVr1uldlPUaFat9C2o+4YuR59TpfwumOt
ocmhtWSpWj+sCZQq14OwudtBT4l53cmkNWJ9kSiBrSWQgO+0O8bjJqx93ZDuDxijgHkAc8Bw
xAkMxHy0lDxmdyo1u7tHgWVAfTmvPIX2FUJuwVg3aYRl4dvhOWEWdbAb0GLkz8L7n2g1J8se
S7dr3AA0cXrRWKcvjUW7GziPUamziaYKmOvku4xGP4l33ct0aEsIbTHuXZojIN/nCNot3+c8
jcV4R+3JCrMdcz1FeMZblOoI+0pD24NpwtYL2VtfkuU5DXyg7EavVW3H2afUexZ2KtteaKfC
XswLpepdOy2R5iSwgBZ6fkYZrcB/oPqeZpAJQB5NsnMpzxsFPh/2nYv8P8N2w8CWY+NHekDa
SY002uN9F1O9MHuoi7MUa3AxjbfXIW4d3QVs1jbOWGG/oK1lAni3hhwvS7VN8hgwQ48VYXex
HbENY3YbbO6uaEe0Gi/2rcgzHelO02yPH/ZOMsJTqKmzErojwFc00zoO+6U7uIv1fQq1tvMB
fIFYww2px/pvD0K/iLF1GPP6fo3DYg1yM2HnNRXrRPgajvL7wyZItTMw9jJgU2VgTVNr4AKx
rlnPYLwBdmNq4jGpoTOdpthDsI510GvVFUAnuf6sDtkcYp1pTtFirdNzczPrPWpjB6HH3I2x
uNW+Uq6hic7faKsTRHgYRTtjoHsVWI+xvRF1ex38IPW2M9xTYm3G+25mzUHbNDBW/yBg3mtE
m/fSywLW03QLMFniE4ztHDoGlFtTaRnWgikYx53EmAaeF+PbWU13QbdB6FniHa0FOrPUus7m
M7QQ2MfSbg6brzm+By2tpmSYn2JNeMIosSqNPQjXRvgy81qsIYBVCXsS8PanzeGA7pRVSa+E
vrnZdAuwzFyINi2kbHMVjQMWmQmYVxOgH0YBYNr50qGs+4ElwFJgsR2gmfY1sAcqaQZwjbGf
1ls9ab2DNcnB2uT9F4B1w9tPSc9uekIA/mex8xANcHbRCLSXkHeA/SQNhb4T+HhIYTtlgj8H
DEM4A3I2+qIzeA/rF6zV2/H9vgT/cTvSbYedFkdDo67EXFGJ+f1LjPFL6FK7lKaYBzEvH6U8
IB3jo431AWQvutGqgM3WC/NBL4ztepQC7AEWANMAH1AAzATygdESg9A3G6m5dTPmwWsxH+6i
dlYR6vEs+mAodcXYSLVeoNGoTxqwESgA8oA+wDRZ5+0YP9sxXpHmrPp1uOj6dTtX/fB9pBj/
hg0RoFRzNw00P6Z482GMkU9pAtbl7ubn0H8KO+V7SodMNw/ReOMFygEy/5u85jbqbZykK8zR
1M8cinE5jBqZg5EnnbqZvamNOR5ljUDZF5uu3E21GlKSMwXAWuo01fJyIAN4k0ZKTKMhzrPA
A8Cfqb1zAyWDJ2NtF/ZcStRISoFuovdNvK9KrOuVNBzIAToDkzXPAvAN4V2p+LHAODGene+o
i+1QT89faTrefa55DPZfJUUJe0PYAWLN9BRgLh5DE+wmNAzf3D3AXcCbEvXoCW89ow/L6JF0
j6c3fLdC6mCUwB74u1x3/0sYhyL2aJoDjYFLdbhlGKQutN9yBL7iEfcI8J2WR4QOa2pjYMcF
9zxKzwPem3j93KixFxHyL93ngXJgrwJ8yhAP6SaGrS/drDPuxxofAQeFHutLO7HGVPs07hHg
+2oJ3Y6zMFRK9g/eC2GDloOF1OuNKSTW3gz0fe/qvRH3RWCflge07kBNQMf2YbF7HHgE2AE8
ANwKvdi7qAWUhu0vxAFtwmShffQ80HsCTuMQ7tFykZDKjnRPCHlR4+4VKnTawm4S8MDGuRNz
qsD1qD9sJuHTCZtD+K3hPnm43w0/oqX5Ld1qebB2p9Kt5qPABoSTEJ5AtxoPAwfJMT+DHmF7
NuIWYd5chDXnQ8mzsfaON4tpMOYGG3bUePNLamEnY654GmWvB/ZSGmzMKgG70HXDYb0igPWl
DmSdkDSFDyFguK4bDpRRS8DcSSs07haAT7IqTKdwE+oMSH/pDlqF77AK+kZAQ+lvhYBnCj9L
+E9yPQbuUb4XkQufLTgczzyjEBygUPWqgH5uI5S/ErIxcKeAdY8xXOVX7Vb1Fr6WkMFndT0a
iWeJfhBt4GdGwjaokW0YQ0Rp5k6RFn3xjoLqM6GXzz0gYJ2gAxzP/hr0O6xyUVeV3zuR+nkn
ChkOGuA55LoC4JZGgvEpdZP4lroL0L8pScD0Yk0QqEXDBYxtSLNN6rpLaL2lYUzRGE3NJP5E
TSRexhgF0P/p4UDfP269iHHSAn0g0IQMiRYRMMgMh3iG6Ae0W/YFvr360ndJoFbSJ9gGf8yl
WOdGqR+O+XSWEw/f7C2M+d3u+049rBUlGLdp8FvawVaHT+qthbmxE+Iwr3q6Iv9XyMv7xfBH
7QF6X1j4nmLPN1Hv48IXEuVi7S+Kepx2RTWmXR7h6wxBmc8CjfDdYr6Hf9RHztnn2j8O29cP
7bd3oGt5nkf5UVGbVdkizit86L8p/xk++E9qPXE/RzvnwM8Wvthw5Osrfa1M92W0Yw6e01U8
S9RX7uNjTkGdR8D/7svrUeT6ItYHlP+RneR+a02iWOsbrAGlNNWeib5NRr/Bj8dz7zfLyAtf
Jx8+TgvM47GyPeJsQmFr2HlEDeCZqzRWAD3kOYQ+f+DzBo0OQqJdvYD5fJYA7NDnCT2BHKBQ
+JuMs84SItrH5wRhZwRLIs4Ihvwn5wPiHCD8LED4sKEzgJepcWjfX/Tlq+698JNixfPku5iP
536Bd5GENW037KGnoZtB7fX+n209qfdyu4m9WfdHzyC1Nyj2DsyB1N56CnPIcPhb/SlL6uGn
YU6X+36wl2LlnpkYq4Wwg4sozSv6ax9sp1ZIe5jGwSccL9fmHrQMWBsOrOt5SJMpIPefh7tf
yD3XB6kPr/Mo+3L4lDmyXLUXi3Ldl5XNgPTSNgi+g+cUwA44JvKYb7nXmm9RjN0Dc0APWiPH
Zg/Y3n9GO4UtPRx11jZH5H6psAHMdXS3/YPa4/TcSTmeTXh2HtZ14aOK9mKsIm8/M8H9l4Dc
R3XRV1/AjlggfZ0FIq3xC/y7jpg/tmCMwd+Uvnb13utq4feea285Ys98AO+bc/s1pgENhV2D
trfWyA7bT56J9Xud3oMWyBK+NSO8HhKqD6r3jXW83h8uAaLRr271/rCEJcfDHr0PvMd9T0Dv
zQ4Eluu92tXWNjLC92blfizvyXZEnNqDJZEWZbwu04g49JlxgjLkWDxMHRF3l52P9n0MJCHP
q9QL/djX/JH6Wc0xTvvSWIz5KLFHAzSyDlKK9C/FmdVfpT4D9tgC+yEqtEqoyEqD/biCZsHv
bGh2h81y1A2KfTxPd7rDvgNxsMucTTQH31SUPuvJkHt4KxEWZzrlyj6Dn6jOYG6HfXsnzbTu
prHed6gsaiy+w2wqgw+zy/MulXmL8D3CXsRzhkibbyPdddbZT9iZHJ+VoU6j2XbEM4jLFnGe
sbDd8miH3HP81X1N2aOwuYtphHE0eAjPmod8l8q8x9yH0I6peA7JZ6G+8gzuTrnnNN7agDZo
ezbyPEzamSLuILXFHNDeynJ/sK6GryvOZDciXIU5oRh2Qn+UvV6ek7VHnjp4xliRDt/DLrzj
XfJ7yKFjvMeqMSfsjFHgZi03oy6dgHbAQICAYaEzRd6LXUr3AD7B0d5OYp+NzweBG/UZIQEd
gLZiz40RdkaoENluffYXdu7XH7ij+txPgqrP/CSaAc31O71Oy0V8thd+vifP9Phcbzo5+hxP
tgVlRMs0uu9lv0+Gf/EaJOpiP4M0P6l9aTnW0zB/bIWe7fYhGuHnapH2/AqN8DM1Pke7iPOc
iznDwbd7V/W5mdzz62vdWz3/ybUAcGLhq6szx1S7J9AXc99ANcdKpCNuG7W2DsGGuFL6dWqe
wvyAOe4XsQcuztHMb91HzFNCh/jVmPPyqVRCzn3uqzJfhtqPdLAGyn3tXjQW85w/DGr+u5VK
AT++6VskxNz+vXvYTHT/LWWJux/z30AxB2JeaW8vxhowlm7n+U7OY+mos5jj/gq8gPnjeRon
15FSmiwl2ux4aYrYg0Wbs2ELZYs9U1E25vL2Ym6T/aTzeOZiXfob5Xibo09+Qf/upzhnGfq6
Dt7ZHqSdjj7+iboA89Dew/YI97D1PuaU+u6XWGvz7AYo8yDNgF2w1c6CLTEA6efSWOFjm8Kf
uQP+0XHqJvduRT8tRL8fhG0j9qcfxZzYgRp53kYbisLW6kdRxrtYXwUGwAaZgW+ygFKdNyjV
MxV+zSfk89RDf4yiRKsr7BGxhuA9mj8jH+LsNEiU4XSllVhDDeFjwg4n4WeaZ1Bf9jMfpbSL
8DOVr1lBKcLflL6m9jOljynO9napMzq7sz7n02d8EkvglwpsoU7inE+c8dU43xtJvaTUZ32h
872PYdOPU+d85jCqa74EPhhxK6mDVYDxNQX+izg3FOeC+jwwlAblIE2aSOMpxdh+3n3EfhHv
PNp9xHOf+7X9FOzAl/DtjwZaANuwvtWH7Oi+ivff1xJzKGwEz1qsxfgezOkYi0XAx8B+bfOl
w1aBLQE7NceGjWYcp5mem6Se1/sZ1nKs6acxXjB+Mcd0tPrB9rsetsuHYfaJ/kbFNyvGjFyD
r8Q3+SGVWospFW2ZKc9N5wAVwBJKFGengDd0froJPuZOeY46W/KvgVKEl2O9b4s1d5zqcysW
47ElJNon+tvqhT4XZ6qz3Q+Nr2S/E95ZF8TNkbhFn6uWAg8DC2Criff0nepzmQ/9D8SbFrAe
ZYsz2dXU2thPY6weNKbG/j58demvb6UCYBbvKdqplCRgptPP8rxWnOOCi/0AyYXuanxHV6t9
hnPuNexEXwkfPBd9M1mdFcuzYfGcGLorEvb4moBuEOT50DUSSC9kfCSgbwF5FqBPhDwXIutx
vnSJF6jHufTtIM/Cf1uPC5TrhzwLF6hfKuS5cLH1OF8/t4U8Cxeox0jIc6FGPTC28gSkbS32
hcSZ1E7M8Qpy30fscYnxGtpTQzp51qX3yBh2gvubgGXS3XLPS6Ct3CMibwP6m4CcV8X8Kb43
MY7FnYmPXFcB3zcgzo7DQVRZKFBzb02VLXE+/a8RYH17tbcl9/4+0uGw/JH7oZHlwIZ4RkD6
8ure4yCW8Lnr2eOCB4SUewoizSRq5cCmtR+g+jKd8P3FmT3WHyBRnM3bH1C6ZxV8aXHe3gB+
k5o/+7KUZ+xLMeeLdXQr0r0m7vdQfXEuL2wMezEgzo+w/ur7eCkhuQ7jZ11wrpRp8o7aBPii
rRwCnwTb+WOkE3fXytzX7LJgCZAH3gZ4HXx9WLgYyKx55nDhPJ4C8nsK3Nc8BcESIA8cOvd1
8PUcto4Ej9svBlcAyyR/Jbha84eAzXZl8Ljzl+AKYJmTFdx5jvBDwGZ99+OCaT374GftCx73
bg6uAJZ5LxW6mmHTDh43PwquAJaZuecMPwRsNm13JLDMGe56nJPBFZ46weWS/xy8yeMEFzrD
g+8Cu+w2wePWN8FSpynq0TB4o709uBPhIQrqPMRJk/mWe+oGlzpbgztD4UuC16swykoL7lJ3
UC6c1tuIJnsbuR7vM8Hl3r8El3onCZ0OHw5eL8Kh+yO/j+z/IG2NfHwXBRil5WgNqdf3UzYB
twGlYeFNYWGBrDB+UenxfRpmd3c1sBLIQ5h0WCAHiDG7B9/V/CdgOdARmA4UnePOXE2o73Sx
vguzQmPVOcINgBigOOzuzEBgvrhDw/dl/j/wn9zv/Y/uAj/3+9DnXUM1IvnyML/89zD3YtJ5
+v0+1Bmbm6dRcHbYjTGOBr+DnKrvbG3QewUZeo/kgveBQ/sAwhcXc+3/TLonrXVAhD50F+x/
BM+i38fFzPkXMw9fzDx2MWtH5HwOPiIyfNZ82CiYW2M+RJjtD7Y55BlZuD0RzsPsiZD9UEfZ
BfAPrmM4I+V9sWh5t7AQ/u5A1LVC3WOz/6D3/mdQrFOH6suz1nLa5e0N2VnZFdV3EeE3LYav
/R7sh3toobiXBux2fqMOAuIenLgfZ09B3npkhc4vkM7rVedAfM5jHaEscSYloO/UNa5xry78
nCKPhofuxwksoPnizqW4Byfbc4s6Z0Abe3om0VWeS+kauwVd461PljgrchrTBCcObXiLsp1a
qNcU+O+fKj9T7L1Y2+HL71N3xdCf8k6Y9QPih6DP5mMe/xDxJyDnYr0QdlBzipY+p0AFdYQN
FG19D5t5n8RW+wA1F5D3z95FOI6aiD0Se4y+F/YMTRF9ZR2my/lMAf7puNDekrq3FiX2X+wM
2gxsCd1HA6z1ZNe4G7yPOoq7cOKOmWxPudqzFj6wZyzlOPeiXX+kVE9rauJJQz2SKc2+GXUW
+/qdUbdH5T289nLOaAR5lMqcQ/peYEt1/w9oj3o0te9GnIF5bAnmuweoQNp2YfdE7YbUy0mm
luj/2eK+H1DmjCKfgLhXKO8busibTYacM8v0vcCuYk+4ej9Z/F2GKF9A31G05B7wOtohwXcQ
hZ35lbxzWI3TSN8Iz1qp2mM31fuWR2iYsxbIogXWh7QA49jwNEcd1sJ/T0IbiqnInoh6wdKP
InU/WEjzCUD8ndJY6NIgXwC2UtgfNbn/AOLteiT+rqmt/D4r3VPCJ7cyaS376vZDwGIjGnFn
zGvhk/9Io/jvlWCjtxd3zMS+n9OJfN4cjO8UeefT55yUZ32x4juMepS6233coL2C4uwKmmBv
Jh/y+kQZ4v4ZIPrrG2cbfSPuF3kNegEyzx5tfGCPppdsgm9ExosKzN3fxPkv2j5BfM8oa759
iPo4ebTQepNiUKdSuytNsZvhG82mDLs2vrWBNNdqh/cl7sdqwDfbp3FAYqe7QcD+jLK8v1K0
9wtq5L0b3+Qs1BVzkFOb2noegTxAY70D8D28RXHifrO9l1pGTZTffl+RVkC0z5lBbZwe8n5l
rPMEZDHFemrjmxpJTcSdX+s9d783GWP6Psr2JGJ+QXoxxj17abbzJ7znDGqA77wMzx2MNon1
v428y3w5tfGeoEKnPhV5AhiLSG/dB7wh/dKP8V42qnccTBd/qyZ8TuMNvH+x31bupkbvoKfs
w7TJPEwrBcArIOcJ/e8B/mSKGkNVTXk0he5GtA1DWFjs14TWgRflfYcNTprxtbijzmlFGvxg
RaDPgWPiz/dqlHcBRP6E6jNYlSl97/r6fv5gHZei8YCCrOMUmf5+QNzib6N5DZzHF6knEW7r
7a1GuE0WZlfNhX1yQAFpzmNPoJ/x9Va1AJYAo4jOBIHTeA90fnkhVB2C7KZwxj0blfx3Cbu1
BKpiNXpEIEfjWg2MtqopEbhJobIMcq66e1P5E/Cz/jsJgT36eYU63FVDhKfoOp+AnA35C+R8
jXL9NxgnNLqqNoi+UnsfOj4cGAFV10F+olCVqlD5qIIs92GFyi8hh2vodFU3Qv9pdf7K2/Tf
ZIRjE7BFY5zGHci7QmOexmkN7qvrNG7TmKOxTKHyjELVMxqPahRp6H4J9QdjDNBOo6NG+wj0
rInw8mU/DNYYomHWhOzbQv33M+Eo0zif/qoI8JjYrsZE1ZXqeZH55Vg1w8ZsRDlVLypU4uuu
fFCh6i81UTlDQOwxwE84qEAtxPn+WfcH9LnexcyR/5+wb6AHMb/7aQzFVtSyfHvNVU/VamYM
A1nJZAWTm5kUM7mJyY1MbmByPZPlTJYxuY7JUiZLmCxmsojJQibXMpnPZB6TuUzmMJnNZBaT
mUxmMJnOpIjJNCaFTAqYTGWSzySPSS6THCZTmExmMonJRCYTmGQzyWKSyWQ8k3FMxjIZwySD
yWgm6UzSmIxiMpLJCCbDmaQyGcZkKJMUJkOYDGaSzCSJySAmiUwGMklgMoBJfybXMOnHpC+T
PkyuZtKbyVVMejHpyaQHkyuZdGdyBZNuTLoyuZzJZUy6MOnMpBOTjkw6MGnPpB2TeCZtmfiZ
tGESx8THpDWTVkwuZdKSSSyTFkyaM2nGpCmTJkwaM2nEpCGTBkwuYRLDpD6TekzqMqnDpDaT
aCa1mEQx8TLxMHGY2EwsJiYTgwlpYrhMgkyqmFQyOcPkNJNTTP7N5F9MfmNyksmvTH5h8jOT
E0yOM/mJyY9MjjE5yuQHJt8z+Y7JESbfMvmGyddMvmLyJZMvmHzO5DMmnzL5hMk/mfyDycdM
/s7kIyYfMvmAyftMDjP5G5O/MnmPyV+YHGLyLpN3mPyZydtMDjJ5i8mbTA4weYPJ60xeY7Kf
yZ+YvMrkFSb7mLzM5CUmLzJ5gcnzTP7I5Dkme5k8y+QZJk8zeYrJk0wqmJQzCTB5gskeJruZ
7GLyOJOdTB5j8iiTR5g8zOQPTB5i8iCTB5iUMdnBZDuT+5lsY3Ifk3uZ3MNkK5O7mWxhcheT
zUxKmdzJZBOTO5jczuQ2Jrcy2chkA5P1TEqYrGOylskaJquZ3MKEzR6DzR6DzR6DzR6DzR6D
zR6DzR6DzR6DzR6DzR6DzR6DzR6DzR6DzR6DzR6DzR6DzR6DzR5jARO2fwy2fwy2fwy2fwy2
fwy2fwy2fwy2fwy2fwy2fwy2fwy2fwy2fwy2fwy2fwy2fwy2fwy2fwy2fwy2fwy2fwy2fwy2
fwy2fwy2fwy2fwy2fwy2fwy2fwy2fwy2fwy2fww2eww2eww2ewy2dgy2dgy2dgy2dgy2dgy2
dgy2dgy2dgy2doxBTwoCq7miVf/WsJkrWjWGWKFCN1e06gNRrEI3KXFjRas6EDeo0PVKLFdi
mRLXVVw6EGJpxaWDIJYosViJRSpuoQpdq8QCpZxfcWkixDwl5ioxRyWZrcQsJWZWtEyGmKHE
dCWKlJimRGFFyySIAhWaqkS+EnlK5CqRo8QUJSarfJNUaKISE5TIViJLiUwlxisxTomxSoxR
IkOJ0UqkK5GmxCglRioxQonhSqQqMawidijEUCVSKmKHQQxRYnBFbCpEckXscIgkJQYpkaji
Bqp8CUoMUPn6K3GNEv1Uyr5K9FHZr1aitxJXKdFLiZ6qsB5KXKlK6a7EFUp0U4V1VeJyle8y
Jboo0VmJTkp0VKKDEu1V0e2UiFdltlXCr0QbVXScEj6Vr7USrZS4VImWSsQq0aKixUiI5ko0
q2gxCqKpEk2UsrESjZSyoRINlLhExcUoUV8p6ylRV4k6Kq62EtFK1FJxUUp4lfBUNE+DcCqa
p0PYSlhKaaqQoQRJYbhKBGUSo0qFKpU4o8RpFXdKhf6txL+U+E2JkxXNxkD8WtEsA+IXFfpZ
iRNKHFdxP6nQj0ocU+KoivtBie+V8jsljijxrRLfqCRfq9BXKvSlCn2hxOdKfKbiPlXiE6X8
pxL/UOJjJf6uknykQh8q8UFF0/EQ71c0HQdxWIn/Y9/Oo5uo9jiA3ztpk9I0TVKSQNcJLS1L
oewQZGlKISylLbQdhALF0jXQ0pIFZClUEcSlgIqI4gIoIkaxDKuAgCJubAq4gSK4bwjuCpa+
7+RXznvH845/6DnvPd+ZwGe+9965czNJ87uFc9pTNHiS4gTFGxSv05TjFMdo8CjFEYrDFK/R
lFcpXqHBlyleojhE8SLFQZr5AvWepzhAsZ/O7aN4jgb3Uuyh2E3xLMUumrmTejsotlNso9gq
29IRsmybiNhC0UjxDMVmiqcpnqIIUDwp27Bf8020yhMUG+nc4xQbKB6jeJRiPcU6irUUj9Bi
D9MqD1E8SOfWUDxAcT/FarrgPuqtoriXYiWdu4dWuZviLjq3gmI5xTKKBoo7aeYd1Lud4jaK
pRS3UiyRrcWIxbJ1KuIWikWytRxxM8VNslVC1MtWbMZ8oWzti1hAUUeXz6fr5lHMla2liDl0
+Y0UsylmUfgpfBReWtpDl8+kqJWtJYgaWmwGzaymqKKYTjGNwk3XVVJU0J2V0+VlFKU0s4Ri
KkUxxQ0UUyiK6EVPpjubRDGRXnQhLT2Bnmg8xfV0u+PoiSRapYAinyKPYqxscSLGyBblGXJl
i/LxzpEtixDZsqUrYjRNyaIYJVvw7wI+knojKIbToEu2LEAMky23IobKloWITNlSjxgiR7kQ
GRROinSKwXIUvr/zQdQbKJsnIAZQXCeblY9GfwqHbB6O6CebxyP6yuZCRB8615uil2zuguhJ
M3vIZuWFdZfNSm12o0ijy7vSM3ShSKXFOlN0osU6UnSgSKFIls3Ku9SeIonWTKQ129FidlpF
pEig6+Ip4ihiKWIoomXTZERb2VSEaCObpiBsFFYKC0Vriii6wEwXmGjQSBFJYaCIoJl6mhlO
g60owih0FFqaGUozQ2hQQyFQcArmbDZOFRVXjSVik7FU/A3tK3AZfsXYLxj7GX6CH+EHjH8P
3+Hct+hfgovwDVzA+NfwFc59if4X8Dl8Bp9GVoifRFaKH8NH8CGcx9g55AdwFt5H/z3kGTgN
78I7huni24Ye4lvINw1V4ilDingSTqD9hiFVfB2OwzGcP4qxI4Zq8TDar6H9KtqvGKaJLxvc
4kuGSvGQoUJ8EdcexHovwPPgbD6A437YB89FzBT3RnjEPRFecXeET3wWdsFOjO+A7Ti3Dee2
YkyGLdAIz+jniJv1c8Wn9fPFp/R1YkC/QHwSNsETsBEehw36ruJjyEdhPa5Zh1yrny4+gvbD
aD8ED6K9Bms9gLXux1qrMXYfrIJ7YSXcA3fjuruw3orwHHF5eK64LLxCbAjfIN4ZvlFcrEkW
b9E4xEXcId4s1Us3BeqlhVKdtCBQJ+nruL4uti6rbl5doO5MnTNKGz5fmivNC8yV5kizpRsD
s6XdwhJWLix2DpRmBfxSiN/i9/k1P/h5wM+H+nl3PxeY3+S3+zURPskjeQMeiXnGeOo9jZ6Q
AY2ecx6BeXj4ruYDWz2xCS6kc77HYHLNlGqk2kCNNKO8WpqGG3Q7KqTKQIVU7iiVygKlUolj
qlTsuEGa4pgsFQUmS5MchdLEQKE0wTFeuh7zxzkKJClQIOU7xkp5gbFSriNHysF4tiNLGh3I
kkY5RkgjAyOk4Q6XNAwvnsWZ4uxxGpNyAzlxuBMWy4d0j3XGnou9FBvCYhtjD8RqoowxYozQ
yRjNM3OjeU30wujl0Rpj2+NtBWfbTl1cxjbH23zQ5mKbkNbONp3SXMxmstltGqvy2mzZBa5g
pg+l7NEn+FqzbUkpLqOVG62iVRgmWjkznzNfMmus+03HTYLRyI3GZqPgNGK6MVKMFJRDc6TG
Gdmjn8toEA2Ccmg2aGxOA0aUFTtEjClwGfWiXpDS9bl6walPz3Q59V27u5iG2zln3ITQhCl3
wa2iC3W91cZDOb6fbynIT03N2hXG8rIaw8ZMbORLG5PzlaNzbGGjdmkjkwonjt/C+bIJW7iQ
WdBoyRpbSP3FDQ1sSHxWY3z++Ma18ROyGuvRcCqNZjRY/BYbGzIhtcjr96am+opwKPL6UoN/
0eN+pZeqDCp/vT70lT/+YJ+l/uGDpiGmePHwXRv0pf6tH/zvffv/C48tDB/R8RnNwi2sVFgE
N8NNUA8LYQHUwXyYB3NhDtwIs2EW+MEHXpgJtVADM6AaqmA6TAM3VEIFlEMZlEIJTIViuAGm
QBFMhkkwEQphAoyH62EcSFAA+ZAHY2EM5EIOZMNoyIJRMBJGwHBwwTAYCpkwBDLACekwGAbB
QBgA10F/cEA/6At9oDf0gp7QA7pDN0iDrtAFUqEzdIKO0AFSIBnaQxIkQjuwgwgJEA9xEAsx
EA1toQ3YwAoWaA1RYAYTGCESDBABegiHVhAGOtBCKIRkNOOoAQE4MFbKMcavQhP8BlfgMvwK
v8DP8BP8CD/A9/AdfAuX4CJ8AxeY8nPFpfwr+BK+gM/hM/gUPoGP4SP4EM7DOfgAzsL78B6c
gdPwLrwDb8Nb8CacgpNwAt6A1+E4HIOjcAQOw2vwKrwCL8NLcAhehIPwAjwPB2A/7IPnYC/s
gd3wLOyCnbADtsM22AoybIFGeAY2w9PwFATgSdgET8BGeBw2wGPwKKyHdbAWHoGH4SF4ENbA
A3A/rIb7YBXcCyvhHrgb7oIVsByWQQPcCXfA7XAbLIVbYQksZqUZ9Rz1z1H/HPXPUf8c9c9R
/xz1z1H/HPXPUf8c9c9R/xz1z1H/HPXPUf8c9c9R/9wD2AM49gCOPYBjD+DYAzj2AI49gGMP
4NgDOPYAjj2AYw/g2AM49gCOPYBjD+DYAzj2AI49gGMP4NgDOPYAjj2AYw/g2AM49gCOPYBj
D+DYAzj2AI49gGMP4Kh/jvrnqH+O2ueofY7a56h9jtrnqH2O2ueofY7a56h99TvBX3pMUN+C
v/RoO6WIhTJ21as5ofwsO9Ox/iyb5bCJe5kBH2kbu45v324dOjSsq24fPq4Cs+MDH8Y4z3Qa
QwTDzpiY9KSdfbQNGvNI/Od9W7quAVt5etPZpmPdms5eiOrf7QLv9v75s+dN3x4z9+/W6/yp
8z26c3M7c5AlUtDpLNqkxDShT4eUvr169Rws9OmdkpQYKQTHevftN1jTq2eCoLFcGxksKH2u
OfFboSa3SSssSEof1ys0IcZoMWhDhbi2UV0HJpvyJyYPTIvXaXRaTWiYrmO/IYlZVcMST+vM
8VZbfFRYWFS8zRpv1jWdCY28/F1o5JXMkKorKzXaAZPS22tWh4cJIVrtroS20Z0HtBs5ztja
FKJvbTLbwnRR5oiOQyc1LbHGKWvEWa20VlM23pZhwiFhXWgsa82SWeJeZuHKL1Im8NucrcKj
VxlnJq0O9bH0C+l4N+gt+N0L0vVOE5SXbbUkoN9XWNcp1zMit3ZkYofR/pxRM0YmNxiTB6V1
HtTRomSOpPk5szava4fR1cMza8Z26ZRVPbLj8D4Jcb2Hd+ns6h1fpPzQ9jC+TUjDvyKMLHIb
0+kvhDDla3FUeW5tUrvEFLy7vdrhqYW0KPPVoig8+PowQ6tQ/muHBDElJUFrjmluvva6BC0/
/8+flOVDVCqVSqVS/VecUqlUKpXqzxFiVCqVSqVSqVQqlUqlUqlUKpVK9R/XWaVSqVQqlUql
UqlUKpVKpVKpVCqVSsUi2WYcNcFfUi4NHpW2js1Cj7f88nJPdrqlrWGRPKKlHYJ2TEtbi3bH
lraODeB9lVVCWmEkjs9saQuY09DS1mB8TUs7BO2dLW0t2ifR5mjjfvjFljbuR8hnm5gd99Kd
9cDRzrKZm5UwD6thXihnPoxlouVhtcFjMUbcaM1gaTiTwarwx87yMFbBKnHOG+yVIcswexaO
pZiZieuqMGcqxtyY4Q7OKwZfcM1SzKtGeth0jCnPq5ypxOi/v6OKYN+Pe7o2uwRZjX4x7swd
fP60Tfae3Xv0tGe7Szw13ppynz2zxlNb4yn2uWtmpNkzqqrsee6KSp/XnlfmLfPMKitNy8px
jchwpWYWV7mnetx/1GsJu9trL7b7PMWlZdXFnun2mnK7r7LsX56ywlPjr1WGS2qqa4tnuMu8
aSyL5TAXG4E3z8VSf/fWKG9dBV5YVfDN+KOZf/bc/+2XmymVYkzhdmZiB/HZFpDdcIqZV7Q3
oR54sJJCd+XtK5vlnGIc+COLDguW1p6v5h9R8vDprYuuXG66o9XXuh3oKrUVrL1/CDAADyyO
rw0KZW5kc3RyZWFtDWVuZG9iag03ODggMCBvYmoNPDwvRmlsdGVyL0ZsYXRlRGVjb2RlL0xl
bmd0aCAyMT4+c3RyZWFtDQpo3mpgoCZQoFB+FNAEAAQYAFY0AMENCmVuZHN0cmVhbQ1lbmRv
YmoNNzg5IDAgb2JqDTw8L0ZpbHRlci9GbGF0ZURlY29kZS9MZW5ndGggMTI3MTAvTGVuZ3Ro
MSA0MjQ3Mj4+c3RyZWFtDQpo3rSbB2BUxfr231M3DQgtlEDYsCSClCC9CSGNEloouqGZhCLd
XEAElGKLGI0IclFUBO9FBUTdxAaoSFGxAXbEgooIqKAoRYGw53tm3tlls0Thfvd/gR/PmXrm
zMyZeWfmLGlEFE0LyaDWA4ektCmP3lQTPq+CvDGzZrpT+rTvQ6Q1ILIjxhdeP/Xxn9I2ELma
EEXWvH7KnPFD379tGFHBvUT69gnj8scefb3tIaInfEjfYQI8qpTUyCaK7QR3kwlTZ86u/eq5
OXCPJOq2bMoNY/IpaYebaNwguB+dmj+7sEHtOk8j/f2I756WP3Xc+4+d/4no8aNExprC6eMK
dx6f2Yqo33Gi2o+SYfbVXyWLIqwVVluUMoHV+IA26xRBejWXbpimoZvfku6k0gYHuYrnpf5D
3G7Cff2OTX7S3nA9pie7SVslwoytVlVxd9QIuR5DnAfowp9b8fdReppepM20jd6lj+mEFkV5
dCe9Tt/TT/Q7ndNIc2m1tQZaM/o/++O/3ZpKVYytZFMdIues86N/nfMjEUp6wecBuOqYyRd8
nBrOsXA//wP+jf7ddjTFyrSx+nvwPa4dc87qPYTb6SDc+l3iWqY47nrM/5x/VYXiFNJ0upFm
0xyaSzfTPJpPC+h2KqK7aBHdjbpYgOt76F4qoftoMd1PS2gpPUDL6J+0nB6kh2gFPUyPoB5X
0mO0SoUJ92P4u1yGipB/0ZO0jjZA/01r6Al6itbCvR61v4GehR/7sPsZ+Kymx+H7JHxFLOH3
HP76qJTK6Hl6AW3G7oBrI22ll+hl6Ca05ivo86/RFrTjVrTsduknfALuv47J/++gN+hNeot2
0tv0DnrGe/Q+7aLdtOf/K+TNoI9wfUAf0kfoa5/Qp/QZ7aV99CXtp2/oWzqAXnf0ovDPEeML
xPlaxfoOsX6gHxHzGGJyPI7zlQw9InP4BGm/pYNaBJ3SdDpHDq5E6y2XLbRCtqNoPdE6a2Q9
i/Z4Dm7RQk8F2+YZ1PEzaE/hEtcPq9Z4FnFLUYOB+qu81nar1uH6fhVxRF2IkF2qLnaqlhD5
bAmmfU+Glcl024O5XqhRfsJPQ2rnq5A6/IEOyZrh2uPQC7UnYhxEHFHLIo+KdXsAabn2RVrh
H5pGhH0B948YHY6ipoX+LFviZzocvD6swo/RL/QrnZL/H6ffMJ6coJNwn4bPcbgu9g33+QN/
/6QzdBYtWE7nQ1znw0LOY+hzMFppmq4Z5L9wdcFXYmqWZmNMi9AitSgtRquiVdWqabHwqRgS
HQypflFITCVhkdKnhlZTq4Xxso5WV6uvxWPcbKglaI20RK1xSFi9YIgbIR6tiZakwuJkynrB
tI0Qo05I3GZaa+0m/N9ca6Wl4PoqrZ3WXuuodYZPS7jbwN0FYa2lptEgKqApdNY6or+P/Gth
VClNzbpu9KiRI4bneocNHTI4Z9DAAf37Zfft07tXVmZGelrP1B7dr+7WtUvnTh07tE9p1bJF
0+SkJp7GjerWqh5brUp0VGSEy7YwCWnUItOTlef2Jef5zGRP794thduTD4/8EI88nxteWRXj
+Nx5Mpq7YsxUxBwfFjOVY6YGY2qx7m7UrWULd6bH7duV4XFv1IbneHFdkuHJdfuOyev+8tpM
lo4qcCQmIoU7s+6EDLdPy3Nn+rJmTSjOzMtAfqXRUeme9HFRLVtQaVQ0LqNx5WvqKSzVmnbX
5IXeNLNLKabgKuK2PiMpM3+sb1CONzMjPjExV/pRuszLZ6f7XDIv90RRZrrHXdpia/G9G2Op
IK95zFjP2PyRXp+Rj0TFRmZx8V2+6s19zTwZvmZzD9bFI4/ztfBkZPqae5BZ9uDgDTSflRTr
cRefIhTec+xoRZ985WMnxZ4icSkeMVhNCA9cE8qGEuL5EhNFWe7ZmEoFcPgW5njZ7aaC+DJK
TWme69PzRMjWQEjtYSJkYSAkmDzPkyiaKjNP/Zs1oa5vYYG7ZQvUvvyXhH8Id/uM5LyCMROE
5o8r9mRkcL0N9fpSM3CRmq+eNbO0dQri5+fhISaKasjx+lI8hb5anjSOAA+3aIOJQ7wyiUrm
q5Xug42nUvlSMjNEudyZxXkZXECRlyfHu4naOt+WtnPHP9+W2lGuKIcvLh2NkpxZ7B073tco
L34s+ud4tzc+0Zeai+rL9XjH5YpW8sT6mn2L2yXKO8pUeLaw2IHI4sldSRFurx5v5IrWgoc7
C/950rohIBbNJZ2iRdO6ub1aPAWi4S4qhriqkA8cRlJ6bxFkiKTpveMTcxP5z98UKV6VyUry
RYTkFQuPYJn4Pn9ZNI4tCtTMnTkuI6SAFTK1VAFVbpWXUxd1oW6MFBGiOXsHgowkvLnw05GN
9BKtWNfto0Fur2ecJ9eDPpQ6yCueTdS1bN/sIZ7snOFe2dqqlwyt4OLwTuzyUSKCAw49HX0w
q3l8oFmlu5d0B529w4L7BILdxRGe7CHFInOPypDceIPw0HZyn/x7OtVoh1czC6ObJyvf4451
ZxXnb3QWFhSXpqYWF2bmTegi8vD0GVvsGeLtFi/LOtg7L36uuFUNytayh6a1bIGxJ63Uoy3K
KU3VFg0Z7t0EW9a9aKi3TNf09Ly03NImCPNuwgogVfrqwld4CodbOEROg+GIkPHjN6USLZSh
pvSQ7jEbNZJ+EQE/jcZs1NkvNuCnw89kv1TpJ/6gkepOQBVjuM10jxXNc0vuhOK8XPFyURya
Ev80n+bpTj7d071U0+0YX5RnXJov2pMm/HsI/x7sbwt/FzoG5kJUjhiTivM8GKfQobwUr3FX
NESW7o2OM9SbuCv+WG4iutpIMNzri2yOsd9K6ot4vQR58O7lWzgmX5SDhnlFWldSnzG56LaB
DBGljy8SOUSqHBAjS6YR3RGJxqBt0IAy/UI4fAtzfbnNxU29E3Nld471UW9PFzQ752klixul
5BbX8LSR7yZehaiku4REomw0xMs+8XDiZrlcSa4YlHyMB0Fj8tyobZPGDEFX57E0Kp59xmFI
NJPHSaLiVSCJxzKSoqtE+SJbIUP8E9fRrcQraSW5cnO58NJ1l4qAe8f6olGi5JCqVAlQOwjq
I8qCf3ehqCLqNpFNzkYa7JmNkUUUWubkQrCvSlKffAz+nD4aPp5OgcQRYoyIVnm8wb4u8eQx
qHcjaehG5ynPnMSQPy1beMTkIDomxW9Cx6bc4nAP34jmLVtEhPtWkd7FxRFVKk/A9RVRJajw
lOtoXjtHrT73xdmiyKO8sr7wp1oTs+oFl7aHyNyHtehlYrdzPhaYt1CJ2Y0GVoYVTSWShlRN
YBymEtAjRLuB/mAYuFH5lxgbkKYe9bmIGPgL0rEubkwlemNnODQZmgF6gwFgBFgI/8YgwXwH
8Z4kQ3/Sec7MQ1mBUSCZbvxDXc+i2uZ8KrH9yDuzEhLBRBp0SaYzyGeQmYZ7AWserm/FNTNJ
qPE2np1pBDxB92mKCcXqTPdeLuYrFOdKpebhmBMo0WxKseEYH1NbRYJQsxdFXS7WYueAwOxE
RcZ7NLwyzCVUBG41n6RkgbEYcRdTE6VuRUPQGvRQ/kWGF+keJW8lFEm2UTs9lor0WCcP2gg6
FPQEQ8A4cDP864I48wbEm0ikT3QeNy2kBXq55E6jCl8bMdTCrE1Fdm+E76yEB8EXNOySHGTs
VujL55EvMPfDLwnKDBdq3EDpCg3YQffNFA8ilMabG+iOy6Y9xdvF1Dwc00S976Loi1hM3RVx
Uk9QrzA6VuInsdsyZjbNN3Kpt6JryHVv1zwQQb3tqgziZptvgRKQTf1MF/W9HPRFVM/eTvUi
I6meuTvk+oYwbg1D+dsvhfF2GMq/Qvz+VC/inyF5/3QhzIpTZFI912iqh34eH4581ouZb2Y7
q8x854z2B03W/nBmQ+tDx4COYBaYCmbAPwLMNw2abHahaXq086ViqrEXda4QcUAbfYbUHnoD
qmXk03z7NnGvCoyRetZZLrU/2uNSDGfsLbLtAvlk65/TfMb5HXqtcRX1YRwHSgG39QljFtIC
vTriv0V19CNA6GcUb8ViDnnu8rBSqY6rGDS9PFDOOWGMrsRPYrxDcdZp8oRjPIOx6V28G+G0
okyFIXUojce7Osx4ggbpr1MH/RQN1zOoE7SLvpO6aB9QA/1RjEXnaLg2lwZqdzj79K24noWx
YAringGnqLNMJ9IQtAt1084iHdLoT6DvxZNbXweeRN11wdh3PcazO8BqMWuX+8H3+oSL/A4Y
HdAeGPuMR6TfQ2BsmN9yME4rh/s+sBQsl/6TwQQjB+5qYCpYJP3vBlONRnD3AtOk3+NgrlEL
7gagifRbC1bpq1Cef4O10u8A2K/vEacQ4EXE/R72Rm2QKcNh05RX0xALfZmkHhD+59MF+lQa
D83Ti6QO03W6Xm8RsFec6cIGQZlKzFXUnG0I/0oxp7G94J8r5ma2F/wPwDYYKO2ArVQ/MN8b
x6k/z+FONZFGzNvGduor5mCeL/39hdqoOzGf2rPoJszzfazp/hPBeVHMhTUwzlelxOBchrE1
OG+dpmE8b8F2iXUGy/kogaoH5h3jAbo2OJc8yvOHMZcGyPkgZOy2XkEZMK5bn9M08zvEFWzG
mCoYhfd0MA02XkO5UXPGOozZQP+JUvE+z5eMhD2ymEy9L80BpPd15oGGclw5iLwxfhhvoq/X
xryQQBnBMeFf5Da701hzBGUZPfGeNyHdHEMzFTNAU+shSgMZ6F+R1mGaZW2BDQj0u2VbmsZJ
2dYd9CY0L0h7vDexNFQg23M63Sfb80bFHLRRAUWF2Iz97HXUxfiSulsdEaZQ9uAAYesF7C0r
gqJcV1KUbGe0q6tFiB0Xxe0s7NSA7WXmU4TkB4wL73Jbw9YssVyIdx/1d7VEHpOkPRtjj4Hf
VDAQdTOQBroG4vohSsX8EGNVA/WRXvSLBrRI9o1ERRe090tyDg7YQwloy6vw7vU1fQhTKBtn
iLBfzBj4CfLJkP3lUWWT7AUPqr4i7K6AHfEZ1RGgveuj/LK/oH8UmfeDNpRjwy6yl8t86lp7
ofWQ/hCNMn6B/bJIxulrFlNDxG+IeiQ7HfedgjiY/1FnJPvWKYzrnymOiznImWquxXgl5ruQ
Odz6AfbdJOpizkTfm0mFQtUcOEvMayIfAWyYWnYHqmG9yP3YHq7mqj4gS84/c4I2h5hnEihS
zHXBsfkM2ux6ShNjt7kA8fsh7Ai1tuOR1yC4b0KfLON7GQvQ3gupr23juhx20lTnjJibzZ5U
3fgXnk2BvvpPgf4IHQKPCIwXaQYYIjCjyIv22QOWGKNpqjGMMtFudWSfbk+rdQ/Ns0rpFvhN
lv5K0UZjlZ0nVfnF69uQ3zZaF1D0q1zwYECNQtKNHpibdmmFRrl2F9wN4L4aNkBXgVHunBK4
utPtocDvDJ5zWfCdm49yzKd8fQWtBNdiTuoAJuq5NBWM0W+ipWDcX8UzhN1cTnkgH1xjvk2D
0WbX4joBdNb2Y269jeZYGP+tWUQRPYlcrUEGq/0MPSbAWDnR2kFtrH0YI15DnZdjrfISdYO/
G9d9oINNL/XD9TqQAbe4HoN+URvXDY1vqKWxCvPvn3iHV9FQYNntqXPEaIwV5dTA1QN9uSPV
R78coO+HvfY74h2ndIz/CcaPWKOmYf7eQilmKvXHdS/k2RksA14wDNQHeWAoyAFXgzT0Ya/+
DOp+NeUYd2L9+jHe42K6zthNXuM6SjI+wfj0FcbJVbCjV6EuVtEgMASI8haATNALdBJcVL6M
yy5fk8rKZ6SgT1jUUH+Buus+2CPHyKOXUbp+EDbcSmoFdzdcd9D3ot98IG2VbG0n9Qe9/pu0
mNdTkDZJL6TW+kykuxFz3SS6Sp9LV+r5yPMeStCnoZ9fbrzPnVZGC+pk3QWWgXSlw8FScBbz
jWAldbV+Bkeoq+2CDVdKGbjOsAqphfUp+sN86mzdQlmuY2iTcmoHOoKhoDEYoq5zRB8D40Em
GCb6NkixfsQasTM1tl/Ae9gPfVCjqnin/MLeEHaAmDPtNIwH14NM6oB3bim4C7wksF+mWfbL
WkRAo26mpXYyzTPHU1PtC9g6ANcK50uw/4L7ctHWhu3RWJfawwnutxxGux92joDXwNcMZWFO
bQEW/d2eh50AXVYJal/CrlM5FfYigutL513wsNI3lR/UeQe8HfALmV9amy7Ul8t5CexjqC/m
lwZijrmwpnF+Bx+BX/maemMNUimBtYHV6iJGCw1dD8j17Hi8v8G9EecI2KH0iPL7Dfyu+FX4
hdiHZCx21oLblQLqifmgAVgQsr/QHdRT2kn4WfdUTmBPwCqunFBb8kK/E33uL/rVNhqPNRjv
g3WAjfMixtQdACpsJrGmE3OXWLeGrslD191GTaprRNFsIw7v2WSarb8MlsJ9C96x62m25oPb
oqb6SSjc5sMIE+GPw2Y+yWpUQdgijDc+jI2zaZrI03wcad7B+moDVddHUTxszHIB3oUYBvM+
MLahngUxFRFrCIHmVARzviPQ12NOZB4SaLsRfz3dVoEFWFssoElGE+dnfQnqHveFfy1QU663
BLXUPcU6S6yf5HwM7mM/Iv/XANb4+bOMvxlz/lmBum8t5H87tDYQbjIeZhDnvCIylGA83EvU
g3iGwD3DMTWqZWpaL5FbIJ24ryBYX+z/tsD4jd4OhAfWa/BfbZTSHYH0rpHUDVAYPeyPYAN8
VMEvVfuG3JLD1ERAf1KKQHdRY0kkdRRoKzFmAvh5JJFYPwMjEnMp0K6jqyWDKVayg2zJ6xQh
MK7A/BwCkbMU6yUy6yvinIOS+hRdAc1xQhH3CNSRqAvLi34v1i4PoB7b0lXml1j7iH3vw9K/
K8bTEZi/BiHuMGOD85k1A/PGZvTb8Vi3TKDq5lisLRpgzMxEmBhXJyF9gtzPKjH2wF7FehRr
t3pyX1isPcWe7zi1j/sz1mq/URbm/gER+6kkojOV2M3wvmJ94voZDMJ7i/Ee66N0OW5Xtn8c
sq9vNeP9dthJMwLjPO5BEW9y3iLMVQt5HuJxAWvwYzyfOLvEXj7W2Rtwr5FI11WkNW91Xsdz
zMZ9Oot7ifLKtbkHaTtjTj5KbQPzUfj8IueIfZgPs5wvYGtVN6Ocp2FbdjWXYy08mqqJdbxx
xFmi7yAD666B5kr4vUAu+TzibCJA6HlECLjnXMVtoDtYGDx/CJw3MLWF4rkwLzrzA2cJIecJ
7UEeGC/WmwEuOksIfz51ThByRlASdkbQ4z85HxDnAKFnAXL/X50BhOz5tzXuh816kGpg3V5d
rpXxDOb7uO8ptEU3rNk2YI31I/yWUjO5/3edc854Se3lpou9WedPexrvDYq9A/1WrGcOwuaA
G/aa3DfEWjcL9qLc9zPF/qTYM/sUdTyTklFPV7vmIC8dttM1iIt5HWvCfDlfV7Zf54J9FrIH
bc509ss9172wx9U8b6zDvBntTBb5qr1Y5OtsZZvB+Z5tA/8esc8KO+AXkQY25kz9c9RBNt59
sSe4jq6E5uD9zTYbIc8uKHPA5gjbJxU2gL4G81U5nn8P3p2VlG2vwr0LnO/kGlU871y8++dg
5+aRJRD1Z0SgLX5HGy6h9sKWN5JgUzekFcY+WmE+j7kG6015z5B9XLHurXRvueKeee/Avnng
+RXXm9kYt7LlOr29YmLIfjLW4zRd7UELCsTaOkDYfvLFe8jKX+0PzwBVUK9nL+wPSwyhcg9Y
4uwXqPbtr3R4YF82dG9W7scG9mRbkab2YCPkPd9y1so4Igx1plfHPUTfPkH19TPOg+YilK0l
nvFqpDmJMWYM1jS/0BXGAPTTFeg7p9EmYo+mOeyy9yjVbIYyrKJ61kDp3xP2WIH5Ecbs5bBd
vM7HeLe8iFtLny3OjzDuWVRk30+3mTsRBrvMbgwb7BWk5bOeTLmHB1tcnul8x/aZcUadwRSj
LxQj7zupZ4RBRRGL8R4+j/zqYOzYQ0WuCXj/YC/qsU4vc/0F264CgTO5kc6B4FmZhTZRtiPy
p0DeIsxG/uZqdbbVy3mT7VFnJcrTX4/1l+FehUgXKdMnOQ/jOSaaG5w/ZLlRXrn3JOw/G2sj
sb+p7Nnw8zBhX8qw92ioLvaYxX5HW2pjdqIE5EXizArp6sr9rWfkORkZu5wTcq3cFuu/1rQa
91htrqOxYo8lsMeqmB1yxlgB5NkMtAKDxN4ayAo5UywKIVIonrc7GBY4Hww5IyTQFCSIPbcA
F50Phj934OzvwrnfyLBzvxbGDc4fIWd+8X975od6Cj3fk3t5gXO9xVRNneN1knvGN1OUiBOo
e1nvw5xHUR4SZbBSRJsj3v1Ig76OehlgRsFvAewMwRtKA3a8uF7O2C8qPlMasO/F9Ud8Pod2
vOR5juuKS5/h4N2dJ8e2flgDibEP76yxSI1/+XLMyxFYTfBOTqI0ub84EHTEeD6MYszRiNNX
0tv4hGoY38KPx5d5csyYTLGSvjRHnKPBDqxpdKKauok4T8sxb45CnNvtlOPbBNAHa8Rt4CnK
EHvdGOcaSvZJ5fFvNc0BccZPyFeAMU/7xdmuZzm/SF3lPIvxrxNINkth2zxDg82eNDMw3slx
7AWqivKIuTJTzEfGswA2D+gtFXOB1RL9W+ybdsQYNhR1Mwr3XuM8h7G8gdGNhH2SHUhjv4B5
6Txlu0ZQttUY7WBTHWsV5qsCtNlJmmtuQfy26Je/0rXmKIxjo8EVGFNucr7AXJuDvhNlvIL3
rQB9pQD1mYc+hDpH3U3Sp+J+B/C+nCW33LsV+7xr6VrEzzCL0b/upgFWU4qwt9BgY9OF8wTj
S7l+bAeKjGHo40UYQ29A3O8R50GMuZHoV13Rz6ehr46kLqjHnhi/a2AdUgT7Mcq8EYo8rDU0
He1cV64H66CcYp15Bd77wDrzZbz/l1pnlqi15hnqJ9ebYq2p1plyjSnO9jZgbjmFPtZCnfOp
Mz59I7XSb0Z73gQepbrinE+c8VU438ugK/VD0EN81hc83/sSzzqFz/n0p+D3O67no19+RR2N
DzEeb6cUmZ84F1TngcE4x1CfKo79CPrtN1QV40+20ZKqumZQLWsw1iGvkssYD7vranAUtASF
QNhNLWks2q2DjXdSn4K+v5Jqou008wBsQrwzss8/S9n6WsyFL+Jdmoz+1Ytm2LAXMH8E5vsZ
mJf7GFOc7bAp48xWmKMHU6a5EbbLR0gzCVSnvnh3+R2tTjn6LJos3mfxLphvY66/h1L1H2iA
PDedBr5FHd1E7cTZqbbNORc8P/2DamllNBj1MVL7E/Ov+MTpVVw/TyP13hhjp3CdG1jPg+FG
Y8wbqHvjZeTXBfZVFMXoNdFXr8X71Zp66j/TYP0g2KbOVR8D74J/wfaNQ5nOcZ3LM1vUv3Ya
a9AY8ALuE8/nsdobsPnT0T8u7O9PCqyJ9RWouxU0OrCniPpqI9BzECbOa8U5rjhjvUJdC7/O
sP068z5DpXsN6zEvrqcHQJw4Q5bPJc6GxX1iaXk45rUVgV869K9ICQfxhSaFA//60IuAfxq0
MsLL8Vfx0v6mHJX5J0Mv4r8tx9/k64FexN+ULxtaGZdbjr+q5ybQi/ibcgyAVkaFcqBfFQjE
nhXGxjvkmdR6ulMh9330VTRe9FdjG9Zi3/PekTzrWh/cH5J7ZWaqc1pg6PSQ6OOSJmpfqAZ9
IpDj6kaMoWKMFP14J12t7UPfD0GcHYcS3LNqFkYTxUX+jiM5ietQAvEb8f6c3Pvbp9yh1Aoj
LB+x9yeQa3nx3eM1GOcCmoI1Soo/S6jcUxBxJmPdvkWutWMw5w6Ua/++sGOWYU5cRt0wdtYw
91Ky/Sbm5i6UZ3Z3jsszT2EDsbayHsecthRjvphHdyKfXzAefwCboRfWPtHOl1irP20eRJ/d
i3mPv8dLVXo17L0EM8rfVqi0i99AmYZSG2sormdSR9hV0oY19znLzH3+ASAZHIP7MWguaA2O
wj0IJFc8U5BpvCrOMeUOprHXwOZY4yyz1/i9oDU4pty5yn3UOOzfbP7knwmmhFxPxvX1YJQV
499sV/PPBFOtnf7dYe734Z4ARqpvPwJhUxC2K8z9vr0d66zt/s2uN/0zwRTXPP+uMPf7emP/
ZiPJPxNM1b/276rgbizDrwejAt+dWhP9++0OuEcHf5q6ngEycP0IGG2m4Zma+gusJf6Z4FFr
ieOBm0CDwHmINd2x7O7+JWC4dcL/qTXdX67cI6yz/k/gLgVz+RsUGfcWMAhhe+D/G64XKPdu
Vwb1cWU4VkSs/xYwyPW+f48rw/8brhco9+7g9yP/QwLfooDMkOsgwe9TLs2o/yCujA87P1rv
6xSB28EUuKOUWzAR1FLkgV/BzaCNCptwye/lxHcxggvfw/wVESAyzG8I+Ie4Dnwv87/gP/m+
9z/BjgFxf48668oVZ1uVXN8Qti7/r7H7gty/B7ZaEtb994Dp6pvh+iHuQlAVVAM3ISwSuhqk
gfEi/qW+Bw7sA8i1uBhr/8ca/Bbs/wh7OVj991zOmH854/BF49h0f68K49h0f9blzB2XM55f
zngYbnvIc7ZQOyPUtgixJ4L2A+wEvQ2t1H69gLUI8/w9VE1+W3gXxvkbqMRVn79jwxq8xHxe
7s/FWs1hHxSgzj5CuBfai+2KC98igr2UaFtwv0f9xXdpoMS+mhIE4js48X2cKewNL9bwov5H
qe/XBvI5UOCcxzhMmeJMSqC+qYuWZzOB7+pCzykGwp4IfB8nQH5Y05WI7+Dk8+wktzxnmEpN
7bupm03UzOxAzVyxFCXOiqxktHFNihHnX1YGxo6XMDa75L7MfMOmWOMpmm93V9+KibVnV1AH
+ZYgzjJcn6L51kno7eo784YUaexBOmDquPchjKvdYdPakvmWRXGSH6i1GSu//6pljoQ+BhDH
+o6qiboyTlCV4JmCi9oH95bkd2vOeXkewN+uVdj3NhY45yp8G3yEksW3cPIbM/E8ft6zFntW
dlfKtmbQlYh3pd2aatnXIq9RyOdOPMMk2PrTULYz8js8kmNGouOgnxTZjdV3gWLPs7v8BpDM
dRQPW6/I6ozw++D3obLxQr4TxZyXbA2E/TgOz9IGjET878gtEN8Viu8NzVSkXU+GHDMPqe8C
H5D7g8HfeGBsHoB2HSRQ3ygacg848J1i4BtEYWcewlikvjuU3x62oQHie0fxfSGUzBG8b4ln
7GSVg4V4rjrU125Hhl0o7VCvWYRnWI75cCnKRUQRIKD6c0D8TmkY/KrKtT9pKyjkR03OVyBJ
fRPVRJylGH7njFiTi+/stJepqVirm2+CMjpklDtn9fupC963Qagv+Xsl4yX0paqUJ/b9rNvJ
7RqJ/h2P93AFtbAbYk1zC9UQ72HELxhv5znnzFfQvt9RH/Ms8rwC90Ue4vszO5HaWbPpkLVS
3IeGuDR6VX4nN1jbaw6mLSZhbUTaa0zg2jntqk7F6Bc95HllVeiT6L9epHNRVbEfaXZGn2nu
lBsjqb2xm2wzB/NoF/S1wPpK7CUMDWO9M05gfktZrpN4Fw84f7gecr53LaVr7B54L9vDryk1
w3jjdq3F+/A75uxZdJP4BjbiXbT7Jhok4grMJrAltpEHfW+++U+UaSDqSacG9mb0+fEYtw7T
LOOM8zHy6Y3+0dseiX6P+EYa9bF34L0/LX9PE4Uxo8gaTFe5CH3jXvQ18S1zIdWPmIs4V2Bu
2cHIfr1Trkv3oD5GcBv7c8Rv1fRcekLbifafi3aLcbKjVtML5qe0VP+UbhfgugxaKPwvBVF5
b+5D5+sEelPg24rgOrFJRbd+Tcg88BrXszVIewNrwTGBuCIO5o8EZPcJ2K/fgXekSVief0H4
n2B5prJbfDsvv7mfqliqvsvvpa4FQ/l7f/y5A/RA/Z2F3hiOtcw/DSyxljm1sV41QW1eu4Jw
W09xkb2lMHY5RxmMQ6H2RIjdgHqeCwaC4cw58ZsFvMrn0L7nvmD3ufIQdZhyqsi588x58ZuD
Vsz5KKZ8HpiP8O+Z8g2K9WCdur+gnaKtopdiliJT/PYgDBEftV5eDJ2m7veb4kGwgu8hKQT/
VuVLEb+hYM4P4fgynxPi9xGK8eJ3GeBrRSt+DlEWmVeh+o3GZHX9D5DFdVp+DBxWZc5Uv8VY
y/meXwUwipaf43tL0hTzQ+4vWAyGhLFU/Y7koRC/15F2nKJAcUiRoxijWAgWhPhPYsp/ZM5v
VRQrrlWMYMp3hDEddFNoigGKmoqqir7M+RehH3JdlJ+G9lME2jyFKd+lCNRvmWK5at8nFKH+
4lvxVYpOYQT8/636Xi++b/maMNap9lqvCMtH9BXZX1ZdSHPeUlRhytMFeIcLsC6IUiSI8/2L
vh1Q3+ldzhj5vwRziZjv6lI7ql0aaWzUz5QlNGy0Uf+zLKE55I+yhBaQ0yynWE5y2Al2/c7y
G8txll9ZfuGYx1iOsufPLD+x/MhyhOUwyyGWH1gOliVEQr5n1wGW78oa1oB8W9awHuSbsoYp
kP0sX7N8xfIlR/mCXftYPmfZy/IZy6csn7B8zPIRy4csH7DsYdnNhdjF8j7Leyzv8m3f4Zhv
s+xkeYvlTZY3WHawbGfZxrKV5XXOcwvLa+z5KssrLJtZNrFsZHmZ5SWWF1leYHmepYyltKxB
G4iP5bmyBm0hz7I8w7KB5WmW9WUNroKsY1nL6Z5ieZLlCZY1LP9m+Rcnf5xlNcsqlsdYVrI8
ylk/wvIwJ1/B8hDLgyzLWf7J6ZaxPMCylGUJy/0si1nu46xLOPm9LPewFLPczbKIE9zFUsRy
J8sdLLez3FYW3w5yK8tClgUs81nmsdzCcjPLXJY5LLNZbmKZxXIjy0yWGSzTWf7BUshyQ1n9
9pBpLFNZprBMZpnEMpFlAsv1LONZxrGMZRnDUsCSz5LHch3LaJZRLCNZRrAMZ8ktq9cR4mW5
luUalmEsQ1mGsAxmyWEZxDKQZQBLf5Z+LNksfVn6sPRm6cWSxZLJksGSzpLG0pMllaUHS3eW
q1m6sXRl6cLSuaxuZ0gnlo4sHVjas7RjacvShuUqltZSDK2sbiu4UtizFUtLlhYszVmuZGnG
0pTlCpZklqSyOl0hTVg8ZXVEh25cVqcLJJE93SyNWBJYGrI0YIlnqc9Sj6UuSx2WOJbafIda
fIea7FmDpTpLLEs1lqosVVhiWKJZolgiOc8IFhd72iwWi8lisOgsGgtJ0RwWP8t5lnKWcyxn
Wc6w/Mnyh7ytdlo+kXaKPU+ynGD5neU3luMsv7L8wnKM5SjLzyw/sfzIcoTlMN/vUFmcB/ID
y8GyOHQw7XuWA2VxnSDfsXxbFpcO+aYsLgOyn+Vrlq/K4jIhX5bFZUG+YNnH8jlnvZflM87s
U87sE5aPWT7izD7kdB+w7GHZzbKL5X2W9zjdu5z1Oyxvc+F3srzF93uzLC4N8gYn2ME32s6l
3saZbWV5nWULy2ssr7K8wrKZs97EWW/krF/mrF9ieZHlBb7R8yxlLKV8Wx/LcyzPctbPsGxg
eZplPcu6stoYd7W1ZbV7Qp5iebKsdn/IE2W1B0DWlNX+f+ybeVRU1xnA731vdmbmMTjsDDMI
AyajbwABRRQGlXFkAsjyVFxABIRR8JFZNJoQiVmatirZNzUaky7JtAEnJiHVLE1NuhiTtE2T
VpvEtmmbNKHaNEsbg/R785GenJ62p3/0tGlzB3739917v5m577vvnplzODSA7o0lN4EOxZI9
oHsw5SCmHMCUuzFlP87tw8y92LsLM+9E3YFPuB11Wyx5GehWfPotqJtRN+GSbsTMGzBzGLUn
ltwI2o2Zu1BfRn0pZl0J+mLM2gq6PmZdA/pCzLoWdF3MWgu6NmZdDboG567GzJ2YcpVnBHxO
qLGfNfvsZ4z19qeBbwNPAU8mLLfHgMPAKDACPAh8E/gGEAUeAO4Hvg58Dfgq8BXgPuBe4BBw
D3AQOADcbei13wXcCdwB3A7cBtwK3ALcDNwE3AjcoO+1DwN7gN3ALqBaz33MfUSWEzt3HtxL
7HRHbJpyHK+MJSm3VhgVilmUWyuIuhQ1gJJRm1H9qD7UJtRG1HxURSxR0TxUOWouag6qDFWK
KkHNRhXHBOU+LUIVopJQFlQiSkCZUaYYbMoYNaISUAaUHqVDaWMmZas1ntXg3wPjwDvA28Dv
gLdgO18HXgNeBX4OnAZOAT+Dbfkp8ArwBPA4cAw4CnwL2A9bsQ8Yo0NY6e0xi3LLb8PiXIba
itqCiqAWoRZiHapRHlQVqhK1AC85GWVFTVP0GM/zXMxjv+8JniNHgOMAzxNcy+WoZtz1JlxZ
I2oZqgFVj6pDXYLyo2pRS1E+1BKUF1WDWoyajsrBxTtQdlQ2yobKQmWiMlDpqDS8zFRUimcv
eAL4GDgPfAT8GTb4T8CHwAfA+8B7wB9hV98F/gD8FvgN8GvgDeBXwC+BX8DungSeA04APwC+
D3wP+C7wLPAMcBz4DjAGPAo7/gjwMHAEeAjYq+w+N4E1HkRdgQrELPBViPaierAsG1DdqC5U
J2o9qgO1DtWOakOtRa1BrUatQrWiVqJWoJajJFQLyo0SsdSzUDNRLtTFqItQM1AFqHyUE/cm
D5WLUqNUKB7FoSieSOI5BJ4ELgBvQmFfBn4CvAT8GPgR8EPgReAF4Hko9GPAtbzTfg0v2q+m
on2nb0i6Kjok7fANSldGB6WEwYpB/yCfMJgJunwwOnh6UHOFb7t0eXS7pNpu3c4Ztvm2SpdF
t0oJW6lxiy8itUTeiLwX4a2RlkhXJBy5JfISDGjvixyJHI/wY5NPeZIicyu8Q5EbIpwV5jkS
oYIynBNJMHvDvqAUigYlVbAkyFW8F6RngpQrDNJlwXVBDrIeCubN8CrZpcGUDG9isDDoCfKX
+mRpICpLDbIs75APyE/K6h3ysMyNQMR5ZL3Ju9nXL73eT8kxbpIkAk9xkzHeIB/lLhBKznIX
PJN0ExRgIxQiIPZIvdEeaYPYJXVHu6ROcb3UIa6T2sW1Ult0rbRGXCWtjq6SWsWV0grIXy62
SFK0RWoWG6WmaKPUINZL9TBeJ/qlS6J+qVb0SUujPmmZjy4RvVINX2aHTxCSDb8D2UPZ57JV
CetsAzZuwHbGds7GD2Sdy+J2ZFIhY0fGcAYvQMNhk25PH04/kD6SrhbiAW8cSBpK4gYsQxau
0OKxvGg5Y1ERy0ELJwwLB4QRgW8Q2oWzwqSgGhHoiPlJ8wtmvsHcbpbNvGBW+nyixywWeQWT
3eRZ4jbx892mKlODiR82UY9JLPZ6THkF3ipjg7HdyB8wUo8x/yLvWcOkgfMYYOKsflLPTeop
4amDUkITQbxO2SOabPfC/fhQClVT+GpxuKXZ5fKPaSeb/KO6ZatH6fWjzmal9TSuGtVcP0qk
VatXHqZ0T+thyi1qGbX6G1dh/9rdu8lCm3/U1rxy9KCt1T86BIFHCSYhILbDKWRhq6stFAmF
wq6QCxqgLQQj4Qj8xkWhBUfCykw4RCDF9Q8eSkZIUSSeFIq0R+A1YAKGQ/FhpdcWT3F9Fh6h
/+ab089ECT6Xj7T2NqIm5EKIP602E55oSTmpI/Wk5Rgx0f0klcyjJ44sXqybpX0Cuhxx0BNE
Ryjd75mm4kyZmVW5pZpdfKNlaZV2F9dCqiZee/VZaE4mlbtPUver4y+PJ048ayl3j780XlRI
LTmWOFYzp9VqNLnTRa60IL9s9uziSq60JD93upmLj5WUzankZxdnc7z1k5FKTulT/vTHDXzN
RB63LaeiuUhNXc5U+zSdjrdnm5yzHYK/LrdsRoZapdPwap22oGxhrrS1dvrzhrSCLFtBmgFs
ywJPPK02f/Su2nx+hWrx+WPcm+UrK/M020wJnFqv2z8jOzmvKGuB3ySY1ObM1Iwsrc5iNlzs
65i4M8OZajCkOjOynMprOScqoCKXTL6l2su/QhaTVlIXMzrKjnIDpIY4Oe7hmhS3mzSMceFH
Ui5e6jBaapWvUpm1LYosdRXwFeywto5UjSs/SeXlVdQ9frzcnVQ+njheXl5U6LSaVcrFF5j5
T9cgtZKfqk4yJGizeaV68eKUiJxSwmRrNhevqGqvXsi6aFbazNp5MxKSFzS0lfbe0V00Tz4U
WLCppcJkMmvVat6U5szMc2ckGCzpNtgaIcORmJSVYtFq9Br+Qkl2aU1ByVJ3isXlnVPoL87c
6HYJBp06Mb+q0LlgZtqSnY/K4cev802vbq+c01BqU6s0al6tF/TWpWs39m1wVdXNFDQajS7F
SdfUBWtzi5r7KhbIUrHYKFfD52UFHebmcmuJQCwxok14jOYQFXGPU/dJuFmsmtyc6flwL8zO
gYvj5qakXViXnpKSTg8aLUY1/XCe6C6fKxrSZvz1r6l0PoPBYDAYDAbjfxHuMgaD8bnlaQaD
wWAwGAwGg8FgMBgMBoPBYDAYDAaDwWAwGAwGg8FgMBgMBoPBYDD+8xAzeRBaPv5Pyl3xVom1
ZAv06NQ/LxeTU1MxT6ZR41Ssgtg+FWsgLp6KtaSC1iivotLDSBYdmoo5Yqb7pmKe5NMHpmIV
xC9OxRqIP4CYQgzr4bKmYlgPN0TuJw5YSyEpgtZB6kiAdJIgkUkI2EDCMLYIoiAZiLcdMBKA
aDMRYaaa9MGPgzTBWA/phblQvNcN7obsLdB2QeYieF4f5KyHsQBkBOJ5HUA4/ppdkNcPDpJN
MKa8rzLTC6N/f0U98X4E1vRJdie4H/odsLJA/P3F+x3FhUXFjrpAZ1AOyRvCjkVycEAOdoQD
8mbRUd3X52gK9PSGQ46m7lB3cEt3l+iv9/qql7gWdfQF1gcDsxbKfV3/2tBU7AiEHB2OcLCj
q7u/I7jJIW9whHu7P7WCnqAcGVCGO+X+gY7Nge6QSPyknniJD2q5hLj+plJKJXvgOvvitfln
mbPIQqhAH1Ty35n1f3tvKKdKyKcOkkgeh3PAgd1kHSHGzuR9cHZo/NSpx5p2rhjf0i7Mf5+k
6+LH8OjbVzyn+MSpI1vPn5rYrX9H+wx0lXMYP6d/EWAACXMvfQ0KZW5kc3RyZWFtDWVuZG9i
ag03OTAgMCBvYmoNPDwvRmlsdGVyL0ZsYXRlRGVjb2RlL0xlbmd0aCAyNz4+c3RyZWFtDQpo
3mpgIB84kKxDgWEIAYeh5Fi8ACDAAMAUASENCmVuZHN0cmVhbQ1lbmRvYmoNNzkxIDAgb2Jq
DTw8L0ZpbHRlci9GbGF0ZURlY29kZS9MZW5ndGggMjIzMDQvTGVuZ3RoMSA1OTY0MD4+c3Ry
ZWFtDQpo3rSbB2BUxfr231M3CQFCCyUQNyyJICVIb0JIo0RKKLpBwIQmLZgLiIBSbBHjjQW5
KCqC96ICom5iww5YsAF2xMJVREAFOygQ9nzPO+/ZZbNE5X73fyM/nzP1zJmZM/POzFnSiKg2
LSWDhg8bmd6pqtYzDeDzGSicWFxUkt+n4B6iL8cSGUsnzpvrTR/UdRCR1ofIjplSclnx/d9m
biLyZBPFNrhs5oIpA8Y1/4ZoAvwy60+dXDTp8EudDxAd2oL8uk2FR+3y+nlECX64W00tnju/
0fMnF8B9NVGfFTMvn1hkXHk57r0O8fvcW1w0v6R5o8YPI/1axPfOKiqevEtzfiDaX4XyrCu5
fM5clBt/+7m83pLZk0u2/zi3A9GQBKJG95JhDtafJ4tirFVWZ5Q6WdR4h57VKYb0uh7dME1D
N78g3cmgTQ5y4fqgISO9XvISBR2bgqS94rlPT/OStobDjC1WHb4b39lzH+LcQaf/rsF/99LD
9CQ9S1vpTXqfftHiqJBuoJfoK/qWfqaTGmkerZHWXGtD/2d/weusYqptbCGbGhM5J5xvghsc
tANKetrnDrgam2mnfZz6zpFov+Adwc3BnXYtSlBpE/S34PujdsQ5ofdjt9ON3fqNfK1S/Oi5
L/hYcE214pTQbLqC5tMCWkhX0SJaTEvoOiqlG2kZ3YS6WILrm+nvVE630K10G91Oy+kOWkH/
oJV0J91Fq+huugf1uJruozVuGLvvw38rVSiH/JMepA20CfovWkcP0EO0Hu6NqP1N9Cj8xEfc
j8BnLd0P3wfhy7HY7zH8F6AKqqTH6Qm0mbhDrs20hZ6ip6HPoDWfo+fpBXoR7bgFLbtN+bFP
yP3HMeX/L9Mr9Cq9RtvpdXoDPeMtept20E7a9f8V8mrYh13v0Lv0HvraB/QhfUS7aQ99Snvp
3/QF7UOvO3xG+MeI8QnifO7G+hKxvqZvEPMIYko8ifOZCj2kcvgAab+g/VoMHdV0OkkOrrj1
VqoWWqXakVuPW2edqmduj8fg5hZ6KNw2j6COH0F7souv73Zb41HErUANhuqv5lrb6baO1Pfz
iMN1wSE73LrY7rYE5/NiOO1bKqxSpdsWzvV0jcoTfhhRO59F1OHXdEDVjNSehJ6uPY6xH3G4
ljmP6nW7D2ml9jkt+0em4bBP4P4Go8Nh1DTrd6olvqOD4euDbvgR+p5+oKPq/z/STxhPfqFf
4T4Gnx/hOtM32uc3/Pc7HacTaMEqOhXhOhUVcgpDn4PRStN0zaDg6avTvgpTszQbY1qMFqvF
afFaba2OVldLgE/1kFrhkHpnhMTXEBarfOprDbSGGC8ba020ZloSxs0WWrJ2jpaitYwIaxoO
8SLEp7XSUt2wRJWyaTjtOYjROCJuG62jdiX+31broKXj+nyti9ZV6671hE97uDvB3QthHZVm
0nCaQDPphHVIfxv5N8SoUpGRe+n4cWMvGVPgHz1q5Ij84cOGDrkwb/CggQNyc7KzMvtn9Ot7
QZ/evXr26N6ta3qH9u1ap6W28rU8p0nDegl1a9eKi43x2BYmIY3a5fhyC72BtMKAmeYbOLA9
u31F8CiK8CgMeOGVWz1OwFuoonmrx8xAzClRMTMkZkY4ppbg7UN92rfz5vi8gR3ZPu9mbUy+
H9fl2b4Cb+CIuh6irs005agNR0oKUnhzmkzN9ga0Qm9OIHfe1LKcwmzkV1ErLsuXNTmufTuq
iKuFy1q4CrT2lVRorftq6kJvndOrAlNwbb5twEjNKZoUGJ7vz8lOSkkpUH6UpfIK2FkBj8rL
O43LTDd7K9ptKfv75gSaUNg2fpJvUtFYf8AoQqIyI6es7MZAvbaBNr7sQJuF+5vgkScH2vmy
cwJtfcgsb0T4BlrASk3wecuOEgrvO3K4uk+R62OnJhwlvuRHDFcTwkPXhLKhhHi+lBQuy82b
M2gCHIGl+X5xe2lCUiVlpLctCOiFHLIlFNJoNIcsDYWEkxf6Uripcgrdf/OmNgksneBt3w61
r/6l4h/CvQEjrXDCxKmsRZPLfNnZUm+j/IGMbFxkFLnPmlPRMR3xiwrxENO4GvL9gXRfSaCh
L1MiwMPLbTBtpF8lcZMFGmYFYAO6qQLpOdlcLm9OWWG2FJDz8uX7n6HOzhcVXbxJj3emLlTA
5QgkZqFR0nLK/JOmBM4pTJqE/jnF609KCWQUoPoKfP7JBdxKvoRAmy9wuxR1R5UKzxYVOxSZ
n9yTGuP160lGAbcWPLy5+J8vsw8CEtBcysktmtnH69eSKBQNd3Fj8FW1fOAwUrMGcpDBSbMG
JqUUpMjfnxQpyS2TlRqIicgrAR7hMsl9/rBoEpsL1MabMzk7ooDVMrXcArq51VxOnevCvTFS
xHBzDgwFGal4c+GnIxvlxa3YxBug4V6/b7KvwIc+lDHcz8/Gda3aN2+kLy9/jF+1tttLRlVz
SXgPcQUoBcEhh56FPpjbNinUrMo9QLnDzoFRwYNCwd6yGF/eyDLO3OdmSF68QXhoO21Q0c09
6nfBq5mL0c2XW+TzJnhzy4o2O0snlFVkZJSV5BRO7cV5+AZNKvON9PdJUmUd4V+UtJBvVZ/y
tLxRme3bYezJrPBpy/IrMrRlI8f4n4Et6102yl+pa3pWYWZBRSuE+Z/BCiBD+ersy57s8LKD
cxoBR4yKn/RMBtFSFWoqD+WeuFkj5RcT8tNo4mZd/BJCfjr8TPHLUH78h0ZqMhVVjOE2xzuJ
m+fqgqllhQX8clEimhL/tIDm60sB3de3QtPt+ECcb3JmoJYvk/37sX8/8bfZ34OOgbkQlcNj
UlmhD+MUOpSfkjTpigZn6d3sOKP8KTuSjhSkoKuNBWP8gdi2GPut1MGIN4AphPeAwNKJRVwO
Gu3ntJ7UQRML0G1DGSLKoEAscoh1c0CMXJWGuyMSTUTboAFV+qVwBJYWBAra8k390wpUd04I
0EBfLzS75Gml8Y3SC8rq+zqpdxOvQlzqjSyxKBuN9ItPEpy4WYFUkiceJZ/oQ9DEQi9q26SJ
I9HVZSyNSxKfyRgSzbTJirgkN5D4sYzUWrXjArEdkCH+8XWtDvxKWqmeggIpvHLd6EbAvRMC
tVCitIiqdBOgdhA0iMuCfzeiqBx1K2eTv5lG+OZjZOFCq5w8CA7UTh1UhMFf0teCj69HKHEM
jxG13DxeEV8PP3k86t1IHbXZeci3ICXir307H08O3DEp6Rl0bCooi/YIXNK2fbuYaN/ayrus
LKZ2zQmkvmJqhxWeah0ta+e4tSc/OVEae1hW1qf/6rYy65x2abuIzD1Yi54ldhfnfca8msrN
PjSsJqxaVK5oQXUZ4yCVg34R2gcMAaPBFa5/ubEJaZrSoDOIhz+ThXVxSyrXWzpjoGnQbDAQ
DAWXgKXwbwmSzTcQ70Ey9Aedx8xClBUYExSzjb+51/OokbmYyu0g8s6pgRQwjYb/JbMF5DPc
zMS9gLUI19fgWpjOaryOZxfOAb6w+xjFR2L1pL+fLeZzlOjJoLbRmFMpxWxNCdEY71Nnl2RW
cwDFnS3Wrc4+xuxBpcZbNKYmzNupFFxjPkhpjHEr4t5KrVz1urQAHUE/17/U8CPdveSvgVLF
VuqiJ1CpnuAUQs+BjgL9wUgwGVwF/yYg0bwc8aYR6dOc+00LaYFepbjBqC3XRjy1MxtRqT0Q
4dtr4E7wCY3+S/YLdgf05VPIF5h74ZcKFcawGpdTlosG7LD7KkoCMa4mmZvo+rOmKyXZZdQ2
GtNEve+gWmdwK/V1SVT6Cw2IonsNfgq7s2Dm0WKjgAa69I64HuhZBGJooF1HQNw88zVQDvLo
QtNDg88GfRk1tbdR09hYamrujLi+PIpronD97aeieD0K179a/CHUNOYfEXl/ezrMSnTJoaae
8dQU/TwpGvWsZ7LYzHPWmEXOce03mqH95syHNoNOBN3BPFAM5sA/Biw2DZph9qJZei3nU5di
Yzfq3IXjgE76HKX99ObU0Ciixfa1fK9qTFR6wlmpdAja468YI9gvqrYL5ZOnf0yLBedn6MXG
+TRIcBwohdzWB4JZQkv0eoj/GjXWDwHWjyjJSsAc8tjZYWVQY08ZaH12oJwLohhfg5/CeIMS
rWPki8Z4BGPTm3g3oulAOS6G0lE0Be/qaOMBGq6/RN30ozRGz6Ye0F76duqlvUPN9XsxFp2k
MdpCGqZd7+zRt+B6HsaCmYh7HBylniodpyFoL+qjnUA6pNEfQN9LIq++ATyIuuuFse8yjGfX
A96Rp6og+EqfeobfPqMb2gNjn3GP8rsLTIryWwkma7yTfwtYDlYq/xlgqpEPd11QDJYp/5tA
sXEO3APALOV3P1hoNIS7OWil/NaDNfoalOdfYL3y2wf26rAx9G3gScT9CvZGI5CjwmHTVNXV
EAt9mZTuY/9TWYxeTFOghXqp0tG6Tpfp7UL2ijObbRCUqdxcQ23Fhgiu5jlN7IXgQp6bxV4I
3gHbYJiyA7ZQs9B8b/xIQ2QOd+pyGp63jW00mOdgmS+DQ1ht1B3Pp/Y8uhLz/CBrdvCX8LzI
c2F9jPN1KCU8l2FsDc9bx2i0zFuwXRKcEWo+SqZ6oXnHuIMuDs8l98r8YSykoWo+iBi7redQ
Bozr1sc0y/wScZlnMaYy4/CejqARxgsoN2rO2IAxG+jfUgbe58WKsbBHbiVTH0wLAOmDnUWg
hRpX9iNvjB/Gq+jrjTAvJFN2eEz4J3nNvjTJvIRyjf54z1uRbk6kuS5zQGvrLsoE2ehfsdZB
mme9CBsQ6DeptjSNX1Vbd9Nb0aIwXfHeJNAoRrXnbLpFtecVLgvQRhMoLsJmvNDeQL2MT6mv
1R1hLq49OJRtvZC9ZcVQnOc8ilPtjHb1tIuw4+KkndlODdleZhHFKL7GuPCmtDVszXLLg3i3
0BBPe+QxXdmz8fZE+BWDYaibYTTMMwzXd1EG5od4qy5ohvTcL5rTMtU3Ulx6ob2fUnNwyB5K
Rluej3dvsBlAmItr44xk+8WMhx9TRIbqL/e6NslucKfbV9juCtkRH1FjBu3dDOVX/QX9o9S8
DXSifBt2kb1S5dPE2g1tivQHaJzxPeyXZSrOYLOMWiB+C9Qj2Vm470zEwfyPOiPVt45iXP/I
5Ueeg5xicz3GK57vIuZw62vYd9OplzkXfW8ulbC6c+A8ntc4HwY2TEO7G9W3npR+bI9x56pB
IFfNPwvCNgfPM8kUy3NdeGw+jja7jDJ57DaXIP6FCDtEHe0k5DUc7ivRJyvlXsYStPdSGmzb
uK6CnVTsHOe52exP9Yx/4tlc0Ff/wej30AFwD2M8SXPASMaMIz/aZxe43RhPxcZoykG7NVZ9
uiut1X20yKqgq+E3Q/m7ijaa5Np5Sl2/JH0r8ttKG0KKflUA7gypUUK60Q9z0w6txKjSboS7
OdwXwAbozRhVzlHG05euiwR+x/GcK8Lv3GKUYzEV6atoNbgYc1I3ME0voGIwUb+SloPJfxTP
YLu5igpBEbjIfJ1GoM0uxnUy6Kntxdx6LS2wMP5b84hi+hN5OsopNav9CN3HYKycZr1Mnaw9
GCNeQJ1XYa3yFPWBvxfXg6AjTD9diOsNIBtuvp6IftEI1y2Mf1N7Yw3m39/xDq+hUcCyu1LP
mPEYK6qouacf+nJ3aoZ+OVTfC3vtZ8T7kbIw/icb32CNmon5+0VKNzNoCK4HIM+eYAXwg9Gg
GSgEo0A+uABkog/79UdQ92sp37gB69f38R6X0aXGTvIbl1Kq8QHGp88wTq6BHb0GdbGGhoOR
gMs7AeSAAaAHc0b5ss+6fK1qKp+Rjj5hUQv9CeqrB2CPHCGfXklZ+n7YcKupA9x9cN1N341+
846yVfK07TQEDPhv0mJeT0faVL2EOupzke4KzHXT6Xx9IZ2nFyHPmylZn4V+frbxPnY6GO2o
h3UjWAGyXB0DloMTmG+Y1dTb+g4cot62BzZcBWXjOtsqoXbWh+gPi6mndTXleo6gTaqoC+gO
RoGWYKR7nc99DEwBOWA0922Qbn2DNWJPamk/gffwQvRBjergnQqyvcF2AM+ZdibGg8tADnXD
O7cc3AieYuynaZ79tBYT0riraLmdRovMKdRa+wS2DsC1i/Mp2HvafbZo66P2aKy/2sMJ77cc
RLsfdA6BF8DnAuViTm0Hlv3ZnoedDF1RA+6+hN24ZqrtRYTXl86b4G5XX3X9oM4b4PWQX8T8
0tH0oL48zlNgj0CDMb805znm9JrG+Rm8B36QaxqINUiNhNYGVoczGM8auR5Q69kpeH/DeyPO
IfCyq4dcv5/Azy4/sF+EfUjGrc56cJ2rgPpjPmgOlkTsL/QFTV3twX7WzTUT2hOwymom0pY8
3e+4z/1Bv9pKU7AGk32wbrBxnsSY+jKAss3Eazqeu3jdGrkmj1x3Gw2oiRFH841EvGczaL7+
NFgO99V4xy6j+VoAbota679C4TbvRhiH3w+b+VdRozbClmG8CWBsnE+zOE/zfqR5A+urTVRP
H0dJsDGrGLwL8QLmfWBsRT0z8dXhNQSjOdXBnO8w+kbMicJdjLYT8TfStdVYgrXFEpputHK+
029H3eO+8G8IGqj1FtPQvSevs3j9pOZjcIv4EQU/B7DGT50Qgm2EU48y7n0bIv/roI0Au8m4
W0CcUy6xkYTj4V5cD/wMoXtGY2rU0NS0AZxbKB3flwnXl/i/zhg/0euh8NB6Df5rjQq6PpTe
M5b6AIqin/0ebID3qvllaP8mr+IgtWLod0pndA+1VMRSd0ZbjTETwM+niMX6GRixmEuBdild
oBhBCYqXyVa8RDGMcS7m5wiInOVYL5HZzCXR2a9oRrWqoTlOJHyPUB1xXVh+9Hteu9yBeuxM
55ufYu3D+94HlX9vjKeXYP4ajrijjU3OR9YczBvPot9OwbplKtUzJ2Ft0RxjZg7CeFydjvTJ
aj+r3NgFexXrUazdmqp9YV578p7vZHcf9zus1X6iXMz9Q2P2UnlMTyq32+B9xfrE8x0YjvcW
4z3WR1lq3K5p/zhiX99qI/vtsJPmhMZ53INiXpW8OczTEHkekHEBa/AjMp84O3gvH+vsTbjX
WKTrzWnNa5yX8BzzcZ+efC8ur1qb+5C2J+bkw9Q5NB9Fzy9qjtiD+TDX+QS2Vj0zznkYtmVv
cyXWwuOpLq/jjUPO7frLZGDdNcxcDb8nyKOeh88mQkSeR0SAey50uRb0BUvD5w+h8wahESue
C/Oiszh0lhBxntAVFIIpvN4MccZZQvTzuecEEWcE5VFnBP3+k/MBPgeIPAtQ+//uGUDEnn9n
4zbYrPupPtbt9dRaGc9gvo37HkVb9MGabRPWWN/Abzm1Uft/lzonjafcvdws3pt1frdnyd4g
7x3o12A9sx82B9yw19S+Ida6ubAX1b6fyfuTvGf2Iep4LqWhni7wLEBeOmynixAX8zrWhEVq
vq5pv84D+yxiD9qc6+xVe667YY+787yxAfNmLWcG5+vuxSJfZ4vYDM5XYhsEd/E+K+yA7zkN
bMy5+seogzy8+7wnuIHOg+bj/c0zz0GevVDmkM0RtU/KNoC+DvNVFZ5/F96d1ZRnr8G9Jzhf
qjUqP+9CvPsnYecWksVw/RkxaIuf0Ya3U1e25Y1U2NQtaJWxh1aZj2OuwXpT3TNiH5fXvTXu
LVffMx8Y2jcPPb/LZWYexq08tU7v6jItYj8Z63Ga7e5BMxN4bR0iaj/5zD1k19/dH54DaqNe
T5zeH1YYrGoPWOHsZdz2HeLqmNC+bOTerNqPDe3JdiDN3YONUfd8zVmv4nAY6kyvh3tw3/6F
munHnTvNZShbezzjBUjzK8aYiVjTfE/nGkPRT1eh7xxDm/AeTVvYZW9RhtkGZVhDTa1hyr8/
7LEJ5nsYs1fCdvE77+Pd8iNuQ30+nx9h3LOo1L6NrjW3Iwx2md0SNthzSCtnPTlqDw+2uDrT
+VLsM+O4ewZThr5QhrxvoP4xBpXG3Ir38HHk1xhjxy4q9UzF+wd7UU9wBpgbT9t21QidyY11
9oXPyiy0iWs7In8K5c1hNvI317pnWwOcV8UedVajPEP0hGAl7lWCdLEqfapzN55jmrnJ+U2V
G+VVe09s/9lYG/H+pmvPRp+HsX2pwt6iUTrvMfN+R2fqZPagZORFfGaFdE3U/tYj6pyMjB3O
L2qt3Bnrv460FvdYa26gSbzHEtpjdZkfccZYDeTZBnQAw3lvDeRGnCmWRhDLiuftC0aHzgcj
zggJtAbJvOcW4ozzwejnDp39nT73Gxt17tfOuNz5LeLML+lPz/xQT5Hne2ovL3SudyvVdc/x
eqg946sojuOE6l7V+2jnXpSHuAxWOrc54t2GNOjrqJehZhz8lsDOYF5xNWTH8/VKwX7S5SNX
Q/Y9X78n53Nox788z/Gc+9dnOHh3F6mx7UKsgXjswztrLHPHvyI15uUzViu8k9MpU+0vDgPd
MZ6PpnhzPOIMVgw0PqD6xhfwk/FlkRozZlCCYjAt4HM02IENjB7UQDcR52E15i1w4XO77Wp8
mwoGYY24FTxE2bzXjXGuhWKPUhn/1tICkGh8i3wZjHna9842Pdf5Xuka51GMfz1AmlkB2+YR
GmH2p7mh8U6NY09QHZSH58ocno+MRwFsHjBQKeYCqz36N++bdscYNgp1Mw73Xuc8hrG8udGH
2D7JC6Wxn8C8dIryPJdQntUS7WBTY2sN5qsJaLNfaaH5IuJ3Rr/8gS42x2EcGw/OxZhypfMJ
5tp89J044zm8bxPQVyagPgvRh1DnqLvpejHutw/vywnyqr1b3uddTxcjfrZZhv51Ew21WlOM
/SKNMJ45fZ5gfKrWj11AqTEafbwUY+jliPsV4tyJMTcW/ao3+vks9NWx1Av12B/jd32sQ0ph
P8aZV0CRh7WOZqOdm6j1YGOUk9eZ5+K9D60zn8b7/1frzHJ3rXmcLlTrTV5ruutMtcbks71N
mFuOoo+1c8/53DM+fTN10K9Ce14J7qUmfM7HZ3zVzvey6Tz9APSAnPWFz/c+xbPOlHM+/SH4
/YzrxeiXn1F3412Mx9soXeXH54LueWA4zhHUpxvHvgf99t9UB+NPntGe6njmUENrBNYhz5PH
mAK76wJwGLQHJYDtpvY0Ce3WzcY7qc9E319NDdB2mrkPNiHeGdXnH6U8fT3mwifxLs1A/xpA
c2zYC5g/QvP9HMzLg4yZzjbYlIlmB8zRIyjH3Azb5T2kmQ7q0WC8u/KO1qN8fR7N4PeZ3wXz
dcz1N1OG/jUNVeems8AXqKMrqQufnWpbnZPh89PfqKFWSSNQH2O13zH/8idOz+P6cRqrD8QY
O1Pq3MB6HowxWmLeQN0bTyO/XrCv4iheb4C+ejHer47UX/+ORuj7wVb3XPU+8Cb4J2zfRJTp
pNS5OrNF/WvHsAaNB0/gPklyHqu9Aps/C/3j9P7+9NCaWF+FultF40N7iqivToyejzA+r+Vz
XD5jPde9Zr+esP16yj5DjXsNGzEvbqQ7QCKfIavn4rNhvk8CrYzGvLg68MuC/hHp0SA+a2o0
8G8GPQP4Z0JrIrocfxQv80/KUZN/GvQM/tty/Em+PugZ/En58qA1cbbl+KN6bgU9gz8px1Bo
TVQrB/rVBIb3rDA2Xq/OpDbSDS5q30dfQ1O4vxpbsRb7SvaO1FnXxvD+kNorMzOcY4yh013c
xxWt3H2h+vQBo8bVzRhDeYzkfrydLtD2oO9HwGfHkYT3rNpE0crlDH/HUfyK60hC8c+R/Tm1
97fHdUfSMIqofHjvj1Fref7u8SKMcyFNxxolPZjLqvYUOM4MrNtfVGvteMy5w9TafzDsmBWY
E1dQH4yd9c3dlGa/irm5FxWafZ0f1Zkn20CiHaz7Mactx5jP8+h25PM9xuN3YDMMwNqnlvMp
1uoPm/vRZ3dj3pPv8TJcvQD2XrIZF+zMquziV1CmUdTJGoXrudQddpWyYc09zgpzT3AoSANH
4L4PWgA6gsNwDwdp1c8UVBq/G+eI6w6nsdfB5ljnrLDXBf2gIzjiugtc92HjYPBZ89vgXDAz
4noGri8D46z44LN23eBcUGxtD+6Mcr8N91Qw1v32IxQ2E2E7otxv29uwztoWfNbzanAumOlZ
FNwR5X5bbxl81kgNzgXF+ufBHdXcLVX4ZWBc6LtTa1pwr90N9+gWzHSv54BsXN8DxpuZeKbW
wQnW7cG54F7rdscHN4HmofMQa7Zj2X2Dt4Mx1i/BD63ZwSrXfYl1IvgB3BVgoXyDouJeDYYj
bBf8f8L1Ete905NNgzzZjhWTELwaDPe8HdzlyQ7+hOslrntn+PuR/yGhb1FATsR1mPD3KX/N
uP8grooPO7+WPtgpBdeBmXDHuW5mGmjoUgh+AFeBTm7Y1L/8Xo6/i2FOfw/zR8SA2Ci/keBv
fB36XuZ/wX/yfe9/gh0PEv8c96yrgM+2ari+PGpd/l9jDwYFfw5stVSs+28Gs91vhptFuEtA
HVAXXImwWOhakAmmcPy/+h44tA+g1uI81v6PNfwt2P8R9kqw9s85mzH/bMbhM8ax2cEB1cax
2cHcs5k7zmY8P5vxMNr2UOdskXZGpG0RYU+E7QfYCXonWq39cBprGeb5m6mu+rbwRozzl1O5
p5l8x4Y1eLn5uNqfS7Dawj6YgDp7D+F+6ACxK05/iwh2U4ptwf0WDeHv0kC5fQElM/wdHH8f
Z7K94ccanut/nPv92jA5Bwqd8xgHKYfPpBj3m7pa6mwm9F1d5DnFMNgToe/jGOSHNV05fwen
nmc7edU5QzG1tm+iPjZRG7MbtfEkUByfFVlpaOMGFM/nX1Y2xo6nMDZ71L7MYsOmBOMhWmz3
db8V47Vnb9AY+ZYjzgpcH6XF1q/Q69zvzFtQrLEL6YCp494HMK72hU1rKxZbFiUqvqaOZoL6
/quhORZ6H0Ac60uqy3Vl/EK1w2cKHuoa3ltS3605p9R5gHy7Vm3f21jinKz2bfAhSuNv4dQ3
Zvw8Qdmz5j0ruzflWXPoPMQ7z+5IDe2Lkdc45HMDnmE6bP1ZKNtx9R0eqTEjxXHQT0rtlu53
gbzn2Vd9A0jmBkqCrVdq9UT4LfB717XxIr4TxZyXZg2D/TgZz9IJjEX8L8nL8HeF/L2hmYG0
G8lQY+YB97vAO9T+YPg3Hhibh6JdhzPuN4qG2gMOfacY+gaR7cwDGIvc7w7Vt4edaCh/78jf
F0LJvET2LfGMPawqsBTP1ZgG213IsEuUHeo3S/EMKzEfLke5iCgGhFR/DPDvlEbDr45a+5O2
iiJ+1OR8BlLdb6Ja8VmKEXSO85qcv7PTnqbWvFY3XwWVdMCock7ot1EvvG/DUV/q90rGU+hL
daiQ9/2s68jrGYv+nYT3cBW1s1tgTXM11ef3MOZ7jLeLnJPmc2jfL2mQeQJ5nov7Ig/+/sxO
oS7WfDpgreb70EiPRs+r7+RGaLvNEfSiSVgbkfaCELp2jnnqURn6RT91XlkH+iD6rx/pPFSH
9yPNnugzbZ0qYyx1NXaSbeZjHu2FvhZaX/FewqgoNjqTGfMLyvX8indxn/Ob5y7nK89yusju
h/eyK/xaUxuMN17PerwPP2POnkdX8jewMW+i3Z+h4RyXMVvBlthKPvS9xeY/UKZhqCedmtvP
os9Pwbh1kOYZx533kc9A9I+B9lj0e8Q3MmmQ/TLe+2Pq9zRxGDNKrRF0vofQN/6OvsbfMpdQ
s5iFiHMu5paXBdWvt6t16S7UxyXSxsF8/q2aXkAPaNvR/gvRbvFOXtxaesL8kJbrH9J1DK4r
oSXs/1cQVQ2UPnSqcag3hb6tCK8TW1V36xdFzAMvSD1bw7VXsBacGIrLcTB/JCO7D8Be/Xq8
I62i8vwDov/C5SkWN387r765L3ZZ7n6XP8C9ZkbJ9/74ux70Q/2dgF4RjbUiOAvcbq1wGmG9
aoJGsnYF0baeyxn2louxwzksYByKtCci7AbU80IwDIwRTvJvFvAqn0T7nvxE3CerItQRqqg6
J08Jp/g3Bx2EU3FC1SKwGOFfCVWbXDaCDe79mS4unV0GuMxzyeHfHkTB8VHrVWXQWe79fnK5
E6ySeyhKwL/c8qXzbyiEUyMlvsrnF/59hMsU/l0G+NylgzwHl0XlVeL+RmOGe/03kCt1WnUE
HHTLnOP+FmO95HtqDcAoWnVS7q3IdFkccX/mVjAyiuXu70juivB7CWknu0xwOeCS7zLRZSlY
EuE/Xaj6Rji1xaXM5WKXS4Sql6OYDfq4aC5DXRq41HEZLJx6Evqu1EXVMeiFLqE2TxeqdriE
6rfSZaXbvg+4RPrzt+JrXHpEEfL/l9v3Bsh9q9ZFscFtr40uUflwX1H9Zc3pNKcsl9pCVRaD
d3gC1gVxLsl8vn/GtwPud3pnM0b+L8FcwvNdE+pCjSpijc368crkFuds1n+vTG4L+a0yuR3k
mMhRkV8l7Bdx/Szyk8iPIj+IfC8xj4gcFs/vRL4V+UbkkMhBkQMiX4vsr0yOhXwlrn0iX1a2
qA/5orJFU8i/K1ukQ/aKfC7ymcinEuUTce0R+Vhkt8hHIh+KfCDyvsh7Iu+KvCOyS2SnFGKH
yNsib4m8Kbd9Q2K+LrJd5DWRV0VeEXlZZJvIVpEtIi9Jni+KvCCez4s8J/KsyDMim0WeFnlK
5EmRJ0QeF6kUqahs3gkSEHmssnlnyKMij4hsEnlYZGNl8/MhG0TWS7qHRB4UeUBknci/RP4p
ye8XWSuyRuQ+kdUi90rW94jcLclXidwlcqfISpF/SLoVIneILBe5XeQ2kVtFbpGsyyX530Vu
FikTuUlkmSS4UaRU5AaR60WuE7m2MqkL5BqRpSJLRBaLLBK5WuQqkYUiC0Tmi1wpMk/kCpG5
InNEZov8TaRE5PLKZl0hs0SKRWaKzBCZLjJNZKrIZSJTRCaLTBKZKDJBpEikUORSkfEi40TG
ilwiMkakoLJpd4hf5GKRi0RGi4wSGSkyQiRfZLjIMJGhIkNELhTJExksMkhkoMgAkVyRHJFs
kSyRTJH+Ihki/UT6ilwg0kekt0gvkZ6VTXpCeoh0F+km0lWki0hnkU4i54t0VGJolU06wJUu
nh1E2ou0E2krcp5IG5HWIueKpImkVjbuDWkl4qtszB26ZWXjXpAU8fSKnCOSLNJCpLlIkkgz
kaYiTUQaiySKNJI7NJQ7NBDP+iL1RBJE6orUEaktEi9SSyROJFbyjBHxiKctYomYIoaILqKJ
kBLNEQmKnBKpEjkpckLkuMjvIr+p22rH1BNpR8XzV5FfRH4W+UnkR5EfRL4XOSJyWOQ7kW9F
vhE5JHJQ7negMtEH+Vpkf2UiOpj2lci+ysQekC9FvqhMzIL8uzIxG7JX5HORzyoTcyCfVibm
Qj4R2SPysWS9W+QjyexDyewDkfdF3pPM3pV074jsEtkpskPkbZG3JN2bkvUbIq9L4beLvCb3
e7UyMRPyiiR4WW60TUq9VTLbIvKSyIsiL4g8L/KcyLOS9TOS9WbJ+mnJ+imRJ0WekBs9LlIp
UiG3DYg8JvKoZP2IyCaRh0U2imyobIRxV1v//8j3Evg2qnPfc2ZGkjUz2vfd2m3JlmTJli3H
y9hxHO+7stvZgAQCOJsJBAKBlrCUEMq+FELZuqRtEjsEQ1LgQh69fSW3XMiDFi4t9PLeLby6
UNrePgKW3zdzJMcJoVDKfff+fs/JN/8zo6OZc77z7Wc0bmoC+A6Bx8ZN3QCPjpt6AB4ZN/UC
PDxuGgB4aNwkAHybdHmQdNlLujxAutxPPvsW6XkfObuX9LyHwN3kC3cRuHPc1AdwB/n67QRu
I3ArGdI3Sc9bSM89BG4eN/UD7CY9byLwDQI3jhuXANwwblwKcP24cQXAdePGYYBd48YOgGvH
jcsBvk4++xrpeQ3pcrWwH/ADzQLP++o2z1t8j+c5oH8AehboGW6RZxzoINABoP1APwL6IdAP
gPYBfR/oe0DfBfoO0GNAjwI9AvQw0ENA3wZ6EGgv0APses+9QPcA3Q10F9CdQHcA3Q50G9Ct
QN8EukW53rMH6Gag3UA3ATUpqU+ok2gR8lAfA65HHnzVuEFUxyvH9aJobSWwZVwnitZmApsI
bCQwSuBiAhcRuJDABgIXEKgjMG9cK0ItgQyBGgLVBNIEqghUEkgRSI5rRDmtIJAgoCegI6Al
oCGgJqAah0WZxDwBjgBLQEmgiIBiXCUutVxYDvh7oCmg3wH9b6D3gN6F5fw10K+A3gT6F6A3
gF4H+iUsyy+AXgN6GujHQEeBjgA9BXQ/LMW3gCbxTsLp7eM6UeQvI8y5lMA2ApcQGCMwn0Az
4UMTAYFAI4EGAvVkyiYCRgIGEZ6kaZoaFzyPPE1T6BDQMSCaRmQslxMYJKs+QEbWT6CPQC+B
HgLdBLoIdBLoINBOoI3AQgKtBBYQaCHgI+Algy8m4CHgJuAi4CTgIGAnYCNgJdO0EDAL9wFO
A30C9DHQSaCPYIH/D9BfgP4d6M9AfwL6I6zqh0B/APo3oP8F9D+B3gH6V6DfAL0Nq3sc6EWg
nwH9d6CfAv0j0E+AXgD6b0DHgJ4HmgR6Alb8MNDjQIeAJoDuE1efmiY83kHgCgLnj+sgFMLr
CawjbDmPwLkEziGwlsAaAqsJrCKwksAIgWECKwgsJ7CMwFICSwgsJrCIQJbAEIE4gRhhdTmB
MgJRAhECpQRKCIQJhAgEydoECPgJyAgwBGgCFAFMNBIJDwHOAOWAfguMfRXofwCdAHoF6GWg
fwZ6CejnQP8EjH4S6Fo66Pk6HfN8Dcc817TtzF69b2f2qrYd2Sv37chyO+bt6NxBczscAJfv
2LfjjR3yK9q2Zy/ftz3LbDdup9jL2rZlL923Lcttw/wlbWPZobF3xv40RhvHhsbOGds6dvvY
CbigeGTs0NixMXpy5llBP1Yzr3Xn2C1jlBE+p9AY1oiXvWOcunVr2+bsln2bs8zmys3UvD9t
xm9txlRiM+7bvGozBb0mNgdKWsXeVZvN9lbt5sRmYTO9qW00u3HfaLZ3dHT0qtG9o8+Myq4a
3TNK7YcWJYwqVa0Xt12U/fVFGB2lZpAW6FlqZpxmR49QOYTR+1ROmMEbgAEXACPOj63Lrt+3
Lnte7JzsufvOya6Nrcmujq3KrowNZ0f2DWdXxJZll+9bll0aW5JdDP0XxYay2X1D2cFYf3Zg
X3+2N9aT7YHr3bHObNe+zmxHrC3bvq8t29eGF8ZaswvotAc8CHLD/43une4P3Ay3yrXRRW10
veX6wEVvdH7gpK5yYI39KvseO62BA0UONo9tj22vbb9NppEaNL9Rv1NPbdTt1FEJnaB7SfeW
jkG6B3WUZo9mr2a/hu7VrNS8r5nRMPs1eL/6GfXP1XSveqV6VE1r1OI5rRXUsYpWjcqjEhbG
VXRdXNWo6lXRe1RYUMWSrYIqEG5t5Hv5lTy9l8cCHyptfZ+dYSmBhQ/eV84oqRklRjQuxhhh
LQBdJK4RNnlaQR4nzFiGIbQ4ODQYjXZOKmYGOg8U9S0/gK8/EBwUj0L/sgPy6w+g7LLlSw5i
fPPSg5iaP3TA2Nm/jJxfu3s3anZ1HnANLjnwoGtp54Gd0BDExgw0kOugGTUvjY5sGduyZWt0
SxQOQCNb4MrWMfgvAYYj4NhW8ZOtWxB0iX7Gn9hjiwhjUqctYyvH4B7wAVzeIl0Wz0akLtH/
Cn9b/jMfjv9LsOD/yz/ryhEkQyi3hX5DpkY0UqAM6kY9aOgoUuH7kQXV4p8damkpKlc8DacU
KsY/Q0UI4/sFA0OpHI5Gf5X8Jrpf196ouIkaQo3Tv3rzBTgc12fix3H8zalXp7TTL+gy8akT
UxUJrPPqJDKqKYVCLvf7YlRVOJROpZINVFVlyO9TU9K1ynR1A51KuinaWLjSQInnmH7jk156
wXSAusw7b7BChqNBi8dQVER73KpgqljT2e1Pl9hlTJGclhUpwulmf3Zbh++fWGvY6QpbWUCX
E3D6OZn65Icy9ceLmZaPj1K/zSxpCMgvU3GUTFl0f4nbFKhw1neqNCqZ2mGxOxVFOjUbaVs9
fY89aGFZS9DuDIr3Ck7PA45YZk4yz8uMyIdC6G3R7GSXPIkCM789xGlwl39y5reCW2wFeZXf
qkJmrDaHONbvY1Ex48c6fygIrlxwCxzisZ7m+bAr4Pe7WZUZ+X1Whd41oM/Kssja2Niot2Rq
dCkdcHblyHDK3j2VxLb4yLDdejyZ2nHdsWPYemxkmDQrEmCcHKcP43Gx8fc8rSIRjS4Nms1k
3cK0V6Gm/b5QKF2NyWJZFH7ayxzk5eaailTGzTOLc/YBRuWqisYqjXIe75Fr/Q2pea1hnfw5
/AQeXROImGS0UqvCzLTawDFyS8TPXKEzcTTNmQ0vTL8O8rgbISYNkulGUVSD9hb466Fue9zO
mUwcEmu5ZaGUWN3k7GEIaCYqKhSByfzEAxAECUptf6VVPKsUwyVBMQQThAlFG6eiML2pDI5P
JeNTIKT6DAip4+CXvE1FYikINuP3+kJVusp0ygssMYmS7qZxZYzy+3WimBtONZl0aP7wxqt6
ct/1lpd78YJtj26qs8bmR6uHF5TkfmBNtNdfe1umpdw83127rO1bT1d3Vnvw1xdsXNRQYgiX
MevLwiX9VwzFB1sqtWyy9wL863BDqTl3wBFvnP6ofGHCnrvFUj5ffL1C5OGzwEM98qBNhIPP
IAN1H0LITt2KlMian6YVIk5Bqe53SNN0iNGoIJszTUzUGATri36D8IQ6jSeyORx4dvhHH/0g
9zNp/l0//MOji3IfRFfecdm1N1x4+9oK6t7x6Qc7yVT797738IoHtjZ9ckvNpu9CpAVzom+C
OZWhA2RG4qpRtwoapaHYUAxzsltVMCL7U7gUhWZ+e1iFu0Mhua2woDZp3Kr+sDTusBhpC/LT
FzQqzhdEIhOPa0Xhdxz+Km4JDAmeyRCTdEF3RhOmx2qU05eIvKF2KdWsTMaqlbkkvk6pEdsa
Ze4y/LLYXgemjSNsYm1hNxg4LneMs4DJC1nY3G2cNSy+ULN75iS9FjgWRk/mOaYwTFK3C2aV
C7ldihIN7lZYeRXuUmg5aD6FFyPDzAeHoW0w2OSTM29NQA+5NFs17pJDbnNI8PXbJGshTjE/
wajItWO6jMQyQfcV3ndWluZyquAfCryEKXLApaV4t1LNyaT2Ft6TDIdSbhXwcbV4lXnIXWrl
c4+w1hK3u8TO5dyclpPL4cDcURbmbBHgVvvMe8x9sgBqRG8Qbk04nRqruOWDwpoj1D2oUtQB
cehWGPqESsIPJngRcfiQz5eJNxzBcfCtbF4+WJiZoMwMGiX5MIp5oxBfVJCP6eiJKdHYEgZO
nTg2BScFVfuPeUyBn8A+0fGajG5wselqHdh0yd1KXNaJFu2UA2aAKUqVUlW76tolI3dfWDvv
gjuWlS0K/llvFIUTP661GVhT06p151fd9+fvL1t14KN7hm5c1+LgmQWuiI0NRAJN275z7uj3
NtcajbisPO0MWTjO7DFOT7vL7U4ju/R7f7x37/TBEYs35EwRmWWuAt8aRz8vWP44EZhgXnAC
eeTyyOYRAR4C9PPibp0lwAGA17NEBgISYwJH8FokIB7cs1E81/AenuLBI57mAyXnF5U4h+Mn
ppJa4gXFP4eg/NL3KhgBSXDnyjAJckxwrdBkrlK5k6FwyqXKOXk3kWOVOxUKJ908fkflSoVD
SbcqwGpZuRwOFDf950KbeaHQygXxG4U24Sq+A7hqQpECVxF1++MCqx0gg8VxGCYI30ThwmkD
LgwN36EqDMiTFAd0ahinHo3ytnoInmdHnYXnmcDwcEipGTBJHDSJdZM51hLHj4vPFz6zw+lm
dJZtogEYAtPITu/3lufZpMJ3wQXZxe5SBw9G8q7CyD5+n7OVEm7IN4FdrEO/JKMTOFUiYYnH
2ZjVap+kzjkUqOB5FhpPoEC638Zz1iO4HNY7NvPBIa2f6qoAjRSKxZZFKx5V5GiJJypick9J
vyc7KwRiVCUKjxhOJZNEpnQprXjQZerjqZQuBdN+/Kt9ymmL58di0AbhG/afZjul+A2nxEhO
4qV8E+dKBAMJJ0/lbmD0noTPl/Do6dydFOeOw3UXly7/Qaw5UcxjK4N9Kk9pTfCgI2ybIwOu
j99R6VhaJtpV58f/Onv96lRa489EPpmmcaQ2oFHDt/L+iZmU6VE9epysw+Gwho1pNEZxV9Md
SwIcQu6agVKREXpNiOoqLYn5eK3Y4jm5ZhLveAL8n+g6YmKhb1ZaRN3LQHiXiYLly5zS5LiO
sHv8K7hngceEtaFQ2G82mz7NYIObtqRCc0SWmdQ6goaN/lS0xJZ72llroRiGc8QC/pidrS7Z
HaosDRg+MUdLQnpM07wzFvDFbOwKC9gddbAxSQ2nd8xr29M1vZwlDoxlvhGPq9xV4Vw4OjjY
V9J69wJqJavlZTIeVJFCfTPvymyyIDJAFDAbCRqp5yASdMORRbZTwcwK0L5Bv5WkD6L2yRad
LRL8ot+Y420KyZwUCM56ngZKZut74N177nr7zk7Ae297+67u3O+Ku3euWn1Nn7e4a+dqEak7
v507ONz70Ml99398YKTnob8cPu8725ratz+8/ILvXdrYdsWjYrwLkkSDRjtRKdqZj3UC8iPU
bUiHXNQ/CEqkC0qjhGQoOiGX8/7J2TwJRw8Jpn5+NvqQfKUoMfkY8G/7YmHS/jPjFGZuEEy3
XPPjnRfmjSlfUYIrYoNbtw2V5aYSrd2lGy9pzKad9LUXfXdLXW7trBbdFI8rLA0rr1rTsiTC
5dp99dn8zLth5mnUgu4nMz+kjelK2SPUC7DG1dR946WNOun9lZi2MHYtJDcTgmCpL1yoh/zm
sODttxQMyux8pFTpxJQUQ2TEVOnL3WWORQrTMfpT7DFb3HQ+c7JYzGZcGQqHQgVudRe5a5OR
pItntppKKoTIQIFxkEL0ppodPTsWx7zCSJ0rVV5iuEjD5n5Y22xMlV+yq2aoxunjNCxomI7H
3oqulD1nmOXnXWVhhubSi7d1N20YajCoSzLtsZmQnz5HWKKXyXPfdFS0iFaqceZdCMyDqB0d
KfiyJuquxwPJQJJ3iLko4mOi4a5GLC4/rKuGf+a6AkvqJnG5wDc5ZKWDZkmOzOJmwBw1EY1K
VEdSDu2UKHZS/iFq2lEU+4pue0oTmYImkvpLTJ4/l5tOjwvl9E1d1/xo7fwtS+bZOQZSDnWq
b7Q90VXlTHSvWb+mO7FgbO/S2Iq+BqNCRtEKFcclWldUR4WoKd57zvpzehL46+fdu67S7PHZ
K2KeiJ3zlngtkYZQWWNFNFGf3do/vHs4pra6jWqL3+4qsfNOr8MUrHRFyedbgO88ZC/vgWT7
UDav0UgO2cuEVSfXF/igl3IH1xwlTOL4senjoqD+1V6nMotTUVnBTkkxxXtSunVUjCjEeCd3
lCXpGEvfIiZgzEOuUhv/8dSsMBl4W6nLHbFxYjIBo79p5l3mhxABRdFiMvqjqJi6BTTSDFEp
z4YGtAOzGfSKuSvXWDC0AvdXOs21raeiobxVneNsfth6/T9es/25XQuljAhCo9DCtfUNa1qC
vDixCogof7Pt6DUt9Vc8eQU9qxnTTPemjmCofUMLzZ2K6ii0EDThEvo1lEICLiWzGldaKiep
5YdQOIxqJ6kFglZHW/AfLdgyyVfiTypxpbjfohSTwcrKWFNkElsFx1s+TO/w7fZRgq/Pt8pH
a3weH8UzPh/jghheUPMwY5dVi7tdJ2MdonURlHBS/47AdzPIGi/4lygJsIeHVw5LGU50eNPU
8CZg37GMmL+L1krQ/CePRrJ7YvkMQoCqfPlTXJxUVd4T5q8w0nIpiPaZxaSMvsQYjZSX6qp3
L1q4bXGi/rJD2xbrwk2JxrVdKS2n4+Sss3VkdN75d6wq+8uq+kVp28LGqqUxj1qrUGjVC+c1
B9svbOvZ0hlIRxojRqfPqbaHLJ6Ay+82lGZ3rXhdH0h5a4R0pbiuV4KsItlGFIFI7M78urLe
9BFqFSQMUerr4D5NbLrKy8gSBZVKTOJOQRXqcLRquzKSiGbEbWlB1j0romIBxJLJO1JxMQ5/
2XvMEfaw6dNST0qRhdBCoTObJa+BKtfsWV7es3BBAFTS7Sm1sTzEt8GEi/e1tLSVrL1xcUnu
Y11kfsqWSKXdVaurKlrKjfh3257e1aYL1ZaulvwGq+Fk/kKolTNARKzu3TUxlrlgoELtS5fk
ftGyMNl3Huh728x7tJd+FVUVvPC4E4WfprYiNbJiD/LMFmYD4sa7oYN5CrehCpBGjsPdFWXS
9MvE3XtBSaYPeXt0SsreRYlOSv7g770T8cLyOREZ2H05MfvyQkwmFeG9tExhre1YHFu398Lq
+Zc+sqake36VWSmjjVpdqLItuWa9PdWdquysCamUvII5YPdbNRavXSvsOLR11/M7G8C0mzVW
v602DqJ3161tF3cEPSEP64iI8tYJduRF2UUohDLojjy3OEfmCDUC9jFObRZYg7eVy4QdjDpS
EBbQ1XZBae2Yrce2HxLU3bKugkUnkkKMJ1F95Ze9x9zsaa7OQpAyK3R0KDQ3jq2mX2Stpe7i
Ehu34K4V5+1eWpJac+vKzu11nCRyTv5kem26YmHUpC9tqbRXpNLFvoJ4re0YAIlaK4pd/Tz8
rwVZm65saasYOLeq5oLBpMZXXSLyrQP4dhjsbxRVYlm+RmUweMvEt02jlcykyDkvXWYooxxl
zzOiqbOocDditAzV1cesYqgHmQMMpBvO+CSpMIkoFEOf+DuhDuu/I7VWTelotdLK426lFToo
PxKcBSGKngDzNpW3dMObRoajUyPDYnT4Zr5wJSj/3z5bMgtyv3eO3JpOl27KFE5L66SgD5cG
pt92zBtuaj6nPaFR8kU0xRSpapdtbd42cem8hku+d8HGvecl/kQvX5lYGLdR+GSsLDPc5DNY
DAq912b2mDVqq0VXt/2pHdueuba1eezBkeILLgvUD8ZB920zJ6m7ZZeiOrQlvypmLYLQcOVE
IhJkJ7FrIr3QHipIYQjU9rCQaCvu0rbNRsnJRlDzY6npY6ljUo7FfsEvnVnRMxEuyOcG2IXq
XqpQ0aPuZopYuUJn81kcYTv/sBjQGA0P885kIFDh4jYaDDK4NBro3tYfbi1RKxnmQ5ffoFAU
KXTBedEB1lLiqo5Px1hSlGapl+PVrhIL27n8huUxlUZlCyMaOXK30Q/Rr6AG1INWYipfZ+nV
JBR0jb8j1fF8B+3pwB1v/5THsOL8TwexexBbB/HgH46bsMWEkUlrojQm06oa+qO6tkhxWfPR
Zgo14+bjNR2a5VhLL39RKO4ljgJko3FqeFifaZQ8r+iE4XT4VQkk/+EQsnOfzHXgz3/4qWfX
Nb/YTDHNWPNXnz9yagSnDWC44MFgUcxm4r9CYTnYW7Mln/UURLYaooTKtHQk9gYSI1wZmo0K
xL2kUDispvNn9ENm7flmQ+XqG4aiPSbekIr9smtbf7R26/6xzd9eF9d5E55oPB31R6rXXD8Q
6fZih86U+3Ffe7AmqO9bGKoJGua1NU7YPQb5uSsyPQkjvSoRs9Z7ey4bjJrUqoDZFaSK6OD8
kbrmsUXJgLC0yltXnbRYeuPzVof9a9p7Ls+Ws8qy3EdtfbZoxtPSa41UTy8qT1Ayg7/YrU1W
WkJxMRa+EiL5lyG+SKKLChkUR60cT0aMk9SqCQia56aU3YJSKO8ItNq6iGEuZJEkDxWLN1+s
/+kFTMnDKc5Sd02niT1/mXdWBIIVTt4QyIQSa6oKsUIBm65rX76j2+crCD2ebuqocrXOn95f
uDI3ThAa69Z/Y61oszfMnMS7ZT0QSHnRgkL9xUw9g5zIBPEVizz48scFm7adjP5VGPypSsun
PztrWdYg+nBRckBk8PYzR25oGMrOq88O1c2Ond4OfgdGCrNIdNXWtHfNy+RX6QisUiVaUxhn
BYzQh3g4mpGfOjxRXm5mJ6knBLWAzD5OVtLubNXNsh1STgj2YIxixq+dTr4j5TBn6za3GIDP
sib5zWUwYwqMzWb6COdKlpSmvHpF7rUzZ4eLiozeilAw5eE1mtzHOMZzXsjcZIy4yfxqruTT
q/PJH/BaXi9d5TQ+Q+4XuXKji8wfb4f5m1Bj3lppVCYMQRXHYhXCHINAWsWSeSuZSr5kLsX8
w46JwuWzF84/tSq+Tw+MjEGuBA/fh/blc95Wg+hH3O4kK/4upq8hLEblSaSdowDjnR1zt627
YXmaOhpay2vay7tsc/k+p5SXOSHufos72CBmf9fNPkfPPkvxTETxLPmllit5ZyIYSrg4nb8q
WL4iDXwKiHzS+dKB2IpZdWTtpZ7iiIXtuK2vesmCpK6ku7MzvHR7Z/EsPyld+RmK+ekr9BWF
1rq+Pku0LhhtCBvq1t3YPWutYA2S6Or8GkQMItPdktFCbq24HQehtmSE+IIR4sAIRWyB9lke
6QmH8pXEAqP/lm9+MQtm+jwLNsuyewY/x4KdxhZgx2qwX22QGzLAjTPqx2NS/Xjs9PqxXVBq
Omarwc65mdxn1I//6je+QP2YYeq2T16+7cDWmvrtT1x+6YEtNblpU3KwsWYo7TBXDDVkhtJ2
/O7mo9d3NF85ecnmH1/X0XTl5NXNowOx0t7RhYDlpT2jYgacu4NBMMu5GbA3zRYy4Gv/Wgbc
ru39uzPgz7vH3Az4LCLwWRkwJCEj4ab6uuJZWbCVetyQCYc7ewbja8QM+KSudH7SViFmwKsq
KxaUmfDUtmd2tWk8MU9uxewew68KgnF+SX2psXvX+LbM+QMVGjEDfn1+e7L/PKI31BGpOrQx
rzchDVhMgUd2Deth4yytolkx+OfEPVs8KLBCtCOkMRW3myS5L9iUlWJWcSyvMezn9z8jBFZ8
Fn/k1BGI+Nkio82tN0XKQVHOUBB/Q02NU+UutnIyhqI7AzE7K4a8gbqy6ROfVpHRZFNIQyuU
LG8ibw+8S30Is29H756qEsdmq8QtAvhRJoZj71SDO2H/TVctiIaguriaoqXSrqYO14lbUg6p
vPuOWNrtMGvFShUyYy1j/nBWKMQ9ZVLfHZYKvCuHo9qpYfh/WvFYKP4PftqXqClTH2bW3zyY
XN6WMPNMEa/kokI27asKG4P13f3d9cHkyHVDkV6hzFDE0LSCL1KGMp0JX7JYG2ro7e9tCGF3
19aesMZiNZWXufwmhc1tV9tL7O5osdNXJixrFDZ0RXi9SaMxeSwOn1FhsprUdr/REyl2esuE
pbBKlpnfUTczB1Etuo2s0hM6nWpeKfKXi97VoiovaGY55FsT/jaXqnBBJRZbLG0V4u8sBEWe
OaCcxyXTlppOHkvqCu9vlH+ZmxBrz5w9ZTs9sTMX0l3qZk7vj1c7Oy9u820wGEWxvIBzES/w
HCtldc/H5hmLbTqFnJPLtpfFDRD4hXovHcA/JTnbT0DFZTJQ8Z+QrC433N6uUCoUpgBw6zKx
TkO/AJ5wQ16juTAp0niolYLGUN4e5mS29vwrEeDLziiniBoqmX0pA1N/ke5nq72cUd9OV5+q
wrwoGjRvqRWc28CKHd1eafKg0voguMDV1YXqi2+uX1t/w3nU7IVcUavkBKn+whWYt3/mpOwV
mPcCdFdeSpwufaysTBuZpOYLnEtbo9YydG2ttm6SigoqgdY2tafatQlO01Y7OfPSBGAZoKAW
G7Va2hJst3QpuwovWUajYpXfFreSYNkW12dg6lbtCekkk9GTyrV4z7N8O1/7lyvo/LY+HT7V
LGSO4sazpdqQf0nzVFP2irzo9zKtt76iosGvZe6kqBsZTaChIlkPZ79TyoB/wZKkk6MPUtRj
tMoeDwZjDo4ep6nvU2KAFow7WPpBrtj9yS91Jp6R8SYt5VYqp39TOKPDLi8H8TfDsDp+ehPP
U3t4HcuI9YTpC7n8GaPUAJeLIc7aDVyOo5sKOyQ+6kZkRQEqIihjVviHLBw/Sa0WNIL4Fi1t
5orjyO/nIBR+XLxWzJW2+zmdq113KnTKiJy1W9+cZa3dqn0TjJh9SuJyYT8MMpOzfVcUP3Nh
mzLP1WoDsDUfrRokPprNwH362iLsrE2UV3s0zKOPMmpXZaSs0oqVf3lHie2ZirIqt1q29wGa
t5eHy6osmPtVpc6sltFKFYvrc8+zKiUtU5t1+An8Lb1NLaflKjb3Ko4U8UUMo7YZcxuAQ+bc
HfQh4FAArc+/H4GVSjWygz9pPiwE7MWs3TpJbQFWqO2edhtraGc7mV7UWYjR5wiZXfsm4UBc
3BsT+LN2h9l7aaJ01YZQKIxDlYV5pwxSQcJsVFBfu1DZ112SsFKKbSqTLHdcZc3Eo0mnWvEy
/azcUFYdzTiKcsdsZoXWqsNRuU1NV/qDpiKat1mm91Gr7bqiInNQev9jASTIv6efRVH0UD7j
YjVBrNVosE6unaSePOwxwj8UmqR+PK4M6gpWVDeJXQJra9PMvnfpgpCpMx8yJRulTcCp42Sx
KxIIVn9kGBZ89t5/062kDG9k+NTLR1KhBnvnvjIn7VxjsUn9XtpAe9LhopUaHvfkjhksMrCx
lFdtVCmYIrA4h/AqJcRV61ylVmWgNKZ3OZw6iklUucIWVq51miqMHqdTOz1dZA6LHiv3L/gx
7EUOZDqohQz05gk9Z3Ei7YnjMMcXKhJB6cX6gqTOvjT/WJHeadql0Fl9dldAi2Xbtb7KoD/p
1UyWNNVWu55l1UUycVzY+IAvYlYozBGIgh+c+SN+it4vxfqOg8g4SU0+wbr9kJho2lDj8UZ4
ZEp8J+LMqFx35iv7T6m96dLStJfnCarPPKfNkZqARhOoiURrA1ptoHa6LZIRL2QikXkizhPl
YweM5zFcgjikHFfSXTAEcb5zah2PNQ0NCU3ZQeGWYaFxyYjQKH6Lyv0zvUj2cwjcbUeRieqG
ryOqZ5zVylA8Dkx7E2TCkGdYvtKg+ESmdUW9pZUORk4tYrTO8uJIys7IctMqLSsr0tp08j0q
HWnBEzbk9lJO2S3Ij3zPIDs+CQ5Riz9CckRTWydMHu5a1AgPmn516lXxFxBycNt6i9mYf4k+
RksCRB5MWYYWLR6Qm8tLnCUODZ3uq7I70r1VFG8tLQ7ErLRsyfO51a+/kVv7gtaiLWIUnGL9
K6+9sWnjG6+dOF9WpKAVajOMZzWMRw/j8aKA+F7flnG9SXYEhqVBHvzxhMnOkgGJv8yQRiSK
DHmRv7I6ra+qpMKhvNMw6ym9vao3TWscJc7ScrN8cPGirIy2lQc9JXaOXn8hZd/0xmuvrIeB
MEUwpGN47xuv473Pq8xqGEyR7OXcIMjREMQNL8kCqBK1oXcK0XDHzLNPaGA1OnC0cZLad4h3
Ovmqp6irERI3WcVPYCaIxxqary2oZ+0kbphIJGShfMo9txzeKCgNS1sktW0Rf6QryFaeSh0L
L/GA6p4YjooVKellnuGo43EYgIb+qp4AzIRHzA2EmTMDX8UZyVk+c6Vfqtv6/dFlu9Y0BNWa
aM/l+y8NdTfHNEUyii5Ss3wo3Z7o39hajM2Z+T1la25aGsnl9CXNcWe6MmGyxhfGYwtiVnxg
zXcuW1DaffGNDy3veuzBb14kKNV6ldbgNHpKLaxKy9etu75L7TSq0ufcvDHVXeVgwdVs2DPk
9zUMIkSjemmdgqDt1WghdhdWqn3m2cPierTjxBFqFBlRCTUqsG6N322Ef2zNU9Q+adFYsmga
GjVPUtccYqvqZXPjZ4OgtC1dILFvgfhL6dPYJxULp8RdnSjJWeBAPDOskdCunI+VzVjZhIsE
zDJYvhDLW7F8AZa3YHk1lqexvArLK7E8hZUxrCzHyjKsjGJlBMu9mC7GHIxdQ/+N4yFriaRy
3tw/LB1PK0VUEyVOnfFzD7KHakmnxV98FKr0afql+m0Htlz82MYab9PqxtRArbv6okcu3HDP
mrinZqCyflWzP/crY7QxOjRgKmtNtPe6bVV9VbHWmOXcc9asxsuX/F/2zTy4reIM4N++p9O6
T0uWJT9Z1mXZkixf8ZFEsZ3EzmEcOzFgghMlPqKJHDmyE8oRYNLQgyEzkGmhAwydAp1pYKAZ
4gQ1ocOUhtICPWZgaCd/MPyR6UCAFAKUmSa2+r2nJ1lyDHUgQP940vz09q337a732293v33f
3rutrmbLgU3NsYEeZ/mqjVubeu+6ORLcvG9t6Ma+tXame2CYWu5a5jVu7GKawsGywI7Zk+7l
TZEya6R5uau3fzO7C92Ckn6L8wIMwCs5Odfycq4lxlPUT1GkbxaIlDmNUSVgy9rftlw7suc9
UFsH3BaMzXvGbSnwTeGUIy/brDz1WIacIfISQhkJxeZvS3/FjLPbrZjtYntDooK9IRH9VmTv
ie/f8+yYv37viYP3/HrMN/d5iamiZlll28ZavTm0rsHbXuswSKn7HvnPseGbnv780Ycvcdej
Ww/v6sYekXpq770ndgeskQ0jd+LY9BNUmWPiUgjmvFWjKrmfyH1E5iVET8Kcawm2XzRMaPCn
qSPHHRYFrjTePoGROoM+TQ5E5a5+v0ZLFGIte6g771uK/1Rk5SxOr4E/n6lnvZfQygau49mi
Fr+P+LGcgqLYEpaSH9ujb4ZcB+YXMDkHFDQJJVlzodnNb8LquFf/xyQKtXy2SaZGixFDH/+t
1K6TUDK1kpjFGou3whOyyN6QaxTikXIvezaOO2enoNdNKcS6ao+lwqyWzYjENEELXn7pDfYo
CoEbsO1ewP63guj5tlOLaogIVbaVyFuIIprm+2KUmNPUhZP1bvxCyynqAigy57PdUoHdRlGd
JvGTumUtDNOyWBeKR1X1ZklwQJvfTbuxwIc8kt3ICHDnvlo+5KaHwPxCEdt8mFN3W9RQVDus
lYa+liXPDzVkoWCacWWwwDdIkh9npJxr2gtidolpMTNGuURrNb7T2R/UmfwrqttuWh1UyVUy
MS0psXbu2B8dfWikzrLh3tRDZA6tMcluu79MISutcTlDbpfpozVT2/qqnG01Voe7Qlkeqiyt
KNVZ3C5L/U0HulfedvjpvY8oOW/5LazXAcruBrKKt4Zla0nJGqIYygltiNSlqT9FVb0Dnt6o
p7fXE6XVtlPUezikvDvDJlCz7/o5IaqxJdWrT5NBaAM5GT6pa8OvuYlv0KZcgzaxqt8zUJMm
oqiOYcQ9rJsj2Zj3dRwsGhe4s3harnnzfpSsaN/EuaUUY0I6fcu8gG1RFf8PYMU19DdfmXlp
58YsCbd+zW+YZZ3Is2qZi1lM/CYHTZ9cdyg90TF9Y6teLqW12pK6DWOrmje32V2r42snVXql
WKzQKfe2Di1nzIGuYMPWnnola1NSErlxxfDt3cMP7Kx3tF7f0pVY7yO3xx4cazSUO7RGm98e
dtsqbGWhTn9td3251OytsLuNMltkbcDZFrBWuBmp0eOwOs1ag6fKWjNw64a2sb5lalrW2DeK
80sV2vLnxEaoxtHxE17DjdIgkQaIpJxItUSqJhIVUXCDpILtCGFs+qATrbzxGa9IBLWnKDmY
MxejKvyj2RbM22ODMyL8LwNpMjoTdfaX5Dw4sZXrZwNn0NBjFZg1S7KGWoCfvm3RJq+GeIPE
GyCecuLVEq+aeFRkkTpxVVl6iVlpFq8Ssi/382/yG/PKTOZHVjNxESd9zqSfUjrCHtbPYk6n
Nmtw2awqIUfElkBHqL47YJzSls7FqbmnyfVkur7xfG5X6rzUGvIyIU+lgXpZrpKL2CMWlz+r
ow7NPsOum7ejjh4Tq2EFvMvrqLiJiBuLBtbmNKU84Yv4Imr7KeoMt4LjJJHVyVbWmbuyUlzY
60eeq9kkT5MdzxssFv7o53xfZ/3J+HOw2XV2IL/5nNMzQ3UTqW4mfFW4UfTrFFM8as6rUtHm
M7sKcxWdtJS4nPxbfvpYzz2nU+2JwWYdrrNFcqWsxN+5vbN1W0eVIzrW07qt2m6tqKRG0TwX
m4xzDa7VnvgTyVbyZPyXe9s1paUavdVTxh4mLy0vtTT2LQuvbyhT2r1UxOdSlgUc7U1z74uo
um2HIZPJ2UCUhH4VWAlt4t6uq6ECHstJSE/EOqJw5iTkJKgNrx2XSEy60xT7kCknIRM2nElc
uGmBXbNsk6LQ6Znt+5wjVkH7q/kiMGsN/aXPLxiipCRnHxduc9CnRVKlbG5QYqhs9DausFMy
8ursOyYT60hAE71FLRX93B5wOw2X3SqtnJZqSnX0xeZ2R6BcKbXUYJvw9ga2yevArko78P5F
nFnC0AH/yK1Ku3g7sYvYcVZ54Dio1ezJvoKlaVuauvV5d5TrK9E08R1nGGlhf6qOyqsH8l0J
l0XSweJz2+zy9AzbYIVmYRdmHWXfiZTg2D6feVTO5q5dMB98aRHZMgpsQ9HClyTNhV6F/MmQ
+fOY9Iva2usOHL8tsGVNnbmERnVX1qzsq9s83V1JBQ9uHr9/yN+aempy6IexVW7N3CVLuDsc
6qo1G/wdodZx6qXrjj5+ZCKq1BtNviqnzyxV69XtYz9YZw80jR3ZGnvilo7q3uSPHovsvn+w
ytneX9e4qbHMBbkPaS+Gevjqod/+YkTPFSM+tzSkegDZz65EfmGekuGvweXFUR4CUL27OOq/
XB2aP86jqy5G//jiGLYXY2wQEPjmMSuvntI+AMsdS8M6U4xtw9Io3/7/jSOxNCp2zcPovzrO
Qh5cHFcZQJXvi3Grrw5P/zzevmJ8/14a1VXfHoHyq6Pm4JXUPgkQPHQloV8JCAgICAgsTtjI
g3NI+Oy1pa79GoEWeWSrwFJpEGVpvPDd0hwBWLYHoBVtyPZegOVoZ67EdejKSYDoNIJrlA69
gICAgICAgICAgICAgICAgICAgICAgICAgICAgICAgICAgICAgICAgICAgMC3B1BAuAPKRqDZ
EOUACVXCnViGa/2h76Tv4q5bkBvoBP0B/SF9gf4X/RH9MX2R/oT+lP6Mvr7oERHo8NcC5eAB
L9RAiItdAV2wGtYDm3YIhmEEdi1eIqGIhmhJGXEQH+kjQ+RmjEuQJNlH9pMD5Md4dx+5nzxM
TmDod+QP5BXyOgiffOuT7fi7GaIgxv7hx/YPogRaoBVWQQcng7XQDT2wAXrhOuiDfhjA1Fsg
BjtRJqMwBuMomTjshgTsgSRMQgqmYBr2wS1wK9yWyWDuPj7XcEGua/hcNy7IdccVuU4syPV7
bK70IO2nq+nl9Au0PfP7zF8zb2b+nnkncy7zz8zFzOeZyyAFGShACwb4BTwDJ+E38BK8Bxfh
U0IITWRETazYZ+zEQ6JkHekl/d+AMvAq8T9TqOHZfLqR/DNS2I93uVpF4CwfpsFAlHxYhOEK
PizBcIQPS6GNrGa1XSRn8yR382EC5eQcH6ZATQEfpsFDqfmwCMMNfFiC4SE+jPWh7oajwGBd
wlCHvwxKL479IIUSmkLGUEIMdGIohRJjf2MYE8fQHpQ/g7JP4JdBacc5+U7jU+zdKF5HMfV+
/B3BlJ34XALT7MC4OKaIc+liyDSXJ9tDJvCawv7BcOWyf9mFsYvXaJy734d1yqXeidcJvI9h
zeJc+cGjTCRcF2E2xnemklPJsWmmM5maTKZi0/HkniCzKpFg+uPju6anmP7RqdHU/tGR4Pre
Nd0d3YHOWCK+IxWv7UgmRpYWxYeZ+BQTY6ZTsZHRiVhqN5McY6Z3jRbUYDyV3DfJRu9MTkzG
9sRHp4LfSvuvR11n9bMDCSyQBpt6HNsywbX/l6Wsxdgk3o9c01TfSd9gtUrjIQyOJ79FPaDw
GgIcN5U7TY+ivhBO68TpflvixfPbNO2fgVXGqeHp9+/g5prXzs7ccuns7GH5B9KX8Vaem5H/
K8AAOORglw0KZW5kc3RyZWFtDWVuZG9iag03OTIgMCBvYmoNPDwvRmlsdGVyL0ZsYXRlRGVj
b2RlL0xlbmd0aCAyMTc1OC9MZW5ndGgxIDU2NjUyPj5zdHJlYW0NCmjetJsJXFVF//+/Z+ac
exHQUMlMMi9eRRS3XMgUBRVQVBQQFcwUVFBKDfelMlxTzOpRs9TH3Ne0Llbu+2OWS2U9qZkt
VmpaLmVapnDn/5k5514uiOXzf54fL97MzHfmzMyZmTPz/c4MpBFRecojTkndujdq8ueZzasg
+QpkDBiamRs7MulnouPvEvHBA8aMcmyf+PEHRFoUkRGcnTto6LKf2m0gsiURlas8aMj47GA+
eyVR3xZEjx0cnJU58Od2LV4k+joY+UUOhqD8umr3E903EOFag4eOGvdM/sVDCM8gar1hyNMD
MvmDVycSvY7o1u8OzRyX++C5ys1RnesQOIZlDs16u8eki0SnUD7fnPv0yFFCxtCph2R87ois
3H7/EmeIEpsRVWTE9QjtFTLIz1hgNEWtHzZdfoymM/Ijdp/BGNP9mX6GmIihDQK5yPagxO4O
h/S5hY3cpB2wv8HCIFgi4/guo6IsDS1G9jeQZi75/iTRkzQS7ZlH02k2zaU9dJr60xT4FtBS
Wk3ryEX76BCdpP/hj3u8MZQC+RayUWUicUtcdq8GW40KPpK5CFXWHcUSESSulJJdcc8VQe6t
tkrkr54tzz6D9DetSNxi0TIsImWYvQD/feqJX+1vuN92rylRnU7UhVKpB/WkXpRO3agrSKJk
SqQnqB9l0gAaSFmUTYNoMOWgvZ6iITSUhoFseppyaTiNQBuOotE0Bv5RlsQMj6PxNIGes9xn
6Fn4x+PvBOWbSM+j5Sd53clet1gyhaaBqfg7nV6gGTQTrvxbUlYylE+z6EX050v0stf/cplS
6X+FXgX/oDno9Xnwv46+X0iL6J9KOpfm02sqtISWI35+ibQyrjj9YnoDqZbSMqRcgdGzplRa
mXIJ7aRdGFMHaTdG2x749tM2+PfTt3SGztKPdIEuahFapNaBrtF1+gStn41Wl22eq/7m4O8g
b4uPRdt6WnYiWqxkO4yx4sz2nKzayRM3FilfQG9M9nkmX/WTJy+Z2pOXb3vJd5JvVCwz33Cu
V1L83iWfMtP5tlnJFlyoJCVjS7esr3/ZXWNW0CqwEn9lP5QOeXxr8YVL1tObtAE+829x2OPb
SG/R25gLCugdeo820xba6g2/i1Bx/CYl8aQpW76ddqhRsIf2qv7/Fx1Qsj3wbbNi91gx25V/
P32AWegIHaWP6H2MnQ8UR+hjjI9P6TPMWl/RN9YIOqFGkFOLoGP0qR5GXxgVNIPvpf2sK41D
+CRbgJ4g4yxViInv1/eJPo/3Tk/rkdo9JTmpW9fELp07JXTsEB8X275d25joNq2jWrV8rMWj
kc0bNWxQPzysdi1nzRpVgysG3Vc+wL+cn91m6JxpVD/OGZ/hcIVluPQwZ8eODWTYmQlBpo8g
w+WAKL5kGpcjQyVzlEwZg5TZpVLGmCljvCm1IEcURTWo74hzOlwfxTodW7XeyWnwz451pjtc
l5U/Ufn1MBUoj0BoKJ5wxFUdHOtwaRmOOFf8mMH5cRmxyK8gwL+9s32Wf4P6VOAfAG8AfK5w
Z26BFt5GUx4WHteyAMtReVmsi9eOyxzoSkpOi4sNCQ1NVzJqr/Jy2dq77CovR46sM81yFNTf
m//i1iDqnxERONA5MLNPmotn4qF8Hpef/4KrYoSrrjPWVXfC2ap45SxXfWdsnCvCicw6p3gL
0FxG7SCnI/8GofLOy5dKSjItia120A2SXvmK3mZCvMdPqBtqiPcLDZV1mbU1hvoj4MpLTjPD
DuofsoliGkWku1iGjNnribm/h4zJ88R4H89whsquisuwfscMrurK6+9oUB+tr35r4xfxDhcP
y+g/YLB0M7PynbGxZrulprliYuGJybTeNa6gcSOkz8zAS+TIZkhOczVy5rqCne3MBBA4ZB/k
dE9Tj1iPuYLbu6APWU+5GsXFyno54vIzYs0KyrycyWnbqKk4U9DMEfJOU2pG6bIerirt0Slh
cflpA7NdNTJCBmJ8ZjvSQkJdMelovnRnWla67CVnkKvuGRQXqkpUT+HdSqX2JJZvbq/t50hj
ITxd9hYEjnj8cbaLQkQQuksFZY+2i3KkaSHkSYZSrBTSVyIfBHjt9h1lFJePtu8YEpoeav78
RZVCrDoZtV1+PnkFQeCtk1nOXatmppYVquuIy4r1qWCJTA2rglZuZdeTybawCsYTfrI7O3qi
eG18uZAxZKNEsherOlyU5EhzZjnTnRhDMUlp8t1kW6v+7dzd2Tm5d5rqbWuUpJYImfEtzJCL
QhHtCbD2GIPxESGeblXhDirsDXYsFZ3giXbk+zk7d8+XmTutDMmBLwgvbQtLyJzVolIzfJrx
mN2c8ZlOR5AjPj9zq8jrn18QE5OfG5cxuKXMw5kwMN/ZPS0qRNU1Je25kAmyqErUWeuc2q5B
fcw97Qqc2ozkghhtRvfeaduCoNzOSE3bxDTWPqNdekEtxKVtcxDFKCmTUimUAYcMyJxSEPBT
6UO2xRDlqVhdCVR4wFaNlMzPI9NowFZmyoI8MgaZbspilEz+oJOqDkYTY7qNcwyU3fNs+uD8
jHT5cVEVdCV+NZfmbEMu5mxToDFboMvfmdXOFeBsJ+XRUh5tym1SbsfA0KpoaBw5J+VnODFP
YUClUYhmDkUus3RsFSI1LfSjkMvpoRhqfUDvNFe5CMz9Ru1OSNdBkgFxB1fegExZD+qRJp+1
104YkI5h68kQSRJc5ZBDOSsHpIhXz8jhiIcGoG/Qger5PARceemu9AhZaFpOuhrOQS7q6GyJ
bjfzNMJkQY3S8ys5m6hvE5+Cf+0XpFMOdaPuaaYkBEEUlm42kj0QNR/gRNSADAdaW6cB3THU
zbnUP8SUZGFK1MOyFP4hViTJ1+K1A8r7u8o1RIb4lf6AhvKTNGrb09PNyqvQC1YClB3kCkCN
wnya0noArYOoBFkX/L6Aqsqk+2Q2yVspxTkOM4ustMrJjmhX+doJmZj8zecDIHG28DzsJ+eI
ACuPA6bULt88EO3Oa6duFWuc40N9fhrUd8rFQQ5MCtmGgU3p+aUFrscjGtT3Ky0tr8T5+X7l
y37AbC+/8l4XQmVTmnak/9JbzW4F+Af7kbbQ12C670m9QnFI+4RIXyYO3yu2EDFKovemVL0h
jSyDUfolSlMIipbwC5QGmlpue9AKpIJES2aykVKMQBpWGr2QUiRGDI1iOqUwXdSGWwXuY6AB
6Aq6gLGQh8BdrM9ButliK1ilh+N5wJ9AGZL+lptLTr0vpdlOIu/wMkBZRhSN+FvaU5jEdpVG
6DVRVk1KNpLgT4PfJEq6/A3STcTvcDVv+DytAFUsd55Rk+beK3o+7bPXoNOl0euIT5HXHtDK
chPBYL5HXCjBdbHlHtls9BGzJLpOCfxNyikLPYu6KMZSawnPQ7l51MByHaAGqA/CQIwlT+RJ
1EGfTE/dwRjIJYspXbtEHbRLoj3ch+B2BHVAD5AChkNeEe5sPYQ6sDbCBfL4IeogYWcoUXHe
cn+h2vw4JdpsFK+PL4NslLmAMv6W7ZQgQT79+X6UtZ/i9OWUwX+E3yROudHETMQv4Io3nE55
PF38CXcUeF6fRs+VYmQZMgW/TK/aHqbVpeFHxZd8Ik0HFS3XH1TlOeJXX/TqlFyKlmXIFLZy
1EgCf2ueSl0s2oBoT9geT11sR6mL8auJejYXDAbNKIl/hn6+B9hw0do2VbT22y1a62+KGrYp
8O+CP6oU3UphyW1jSjGzFJbcm34sKIcy2vvkPaU4L/2sieEvWttrwF+d2pWGHxC7SgN5tKIe
JWonKFo7ISQ3QRIIAcNAMugLZsg0sHSjMX7DtJ9EKw98BdrZJNrMhxqwh1R+72m3qS0romhb
qlVWMRHKnS2uKTeEupai8R2yKPQvsE2Fv7q4aULJbDdFm4ifgODVqZyJuAZ+9YSNVSZ6CxGh
/SqqsbdoODsA3qJMtpPq6edpuD763jAq03B7ZxpuO3VvoJ65IMlyJbKfngLZIMdHnsv/Qc8a
W+nl0vCx4hifR/cDzXIlwbwuGRak3BE0nGfSJD6OerMvaD07TktYW1qt/MtorbZP3IB/DfuS
lmj9abk2VFxkr9FSrS8t1bvQUnYanEDakzQGrNd+QbgxTdF+oB2I28em0b/4VfqYPUt92XR6
mbWg51gqERsN5slVu8iPqPAC63mnTNWxH1CywiVgUCnZYpCjCYShF/DlYK2SZ4EMXgv53YAs
HgxS8qVgIq+DcAJ40pvHczwQ4ftARSXbANaxf+D518FSJbsIvmfQMdh+8B7S7gPfQedQ2kdh
CnhEOwQ95AT42ATvkihho4V8/lv2vLgF95L2h/iRPeLVV16TOgjvjvV1KtYxpUO435drmqkv
uDdDXxhh6gvu7VJHUHrAq+KoZ71HG5O5hgubegZrN39TXLfW4V38vHsW3FRbMMrEemoj2oN1
PdBIct+w1sTxci1kt+UaIz4x1zL3p2puVeuW+5BeQBnmuuXehbUpVa1H34ltnnWHv0AB5loi
WunjEJZryOPiploXptAUPsW9Am6QgZaS87qRRouQZyW9QKRiDUhWPIZx3lL8gXE9Tm+MdKuo
kYR9SM0w70YrxlGM3paGsCaUxZqIr8EE1sR9Vc4p/F3MVV1R5mtYUxj0NE5NvXPCEDL0SuLf
eLYz+j+JP4h26kGjLXJAOaMV5vtI6oT3HmOsw7c1h3pK2EzVl/5cnZsURjKDrjFDexTYWC1R
gDH4vibEZdWfiZSu+jMXfSAZgz6qI3J8dMdU22DMPYeJQ+9J8WDpg12lrufVt34Qb9lugZOm
3mjnxXqc/qfZz1JX9eheegus4ZIttN+YZ/a18RD02xtgBO22XaNU+8Pw/0zLbFWh18aA/vSw
nkm59nLIa7i4DT13qX6NlkFnJDU2rmD9k3pSMPpTUgfjIU+M9dGH6hvjxM9wK+gzEWdh6Tg9
pP7CP8R4AHoTsU6NlzGWTrIIPKl0jQ5K7/LoEYuh6+HL1BtBh/Q3x4v+EnXSc9A3t2ihzUmd
bHEI96MJxhTU7QI4Cz3sF+pva4S8MCcgbpI+gCajP8imodwmKFOu4+0RJ8fWceSVAB0OYN6T
a1Cy3lzNu+1813BbJ3EDeja35ly5Rnaz1sBctaZtxnoG9PvFTpSz08ghm/4o1rFwa62qAeqp
dSxbrkNKx8AaI9c5WyR0JTU3Y+35DONtBcrE3K13sOb3vZQp09gyYYt0ol5GKmXxHZTNZ2Gd
mg3d/ADG/BFxTu9MiXJt1uvQID4M72aBsbpKwhZhPl6E9W8RDeXv0S1QE0Tzb+h7lkGLQE8+
kL7GWtAY4/hVOaZZLRqKcd7JmEYJGN+XwPNAgDnoo4tgMigEr8pnoPu9zjbTs2A8mA/m6g9C
D3wQds+DtADM4NXEcPatWMjfpgu8UPPjleko+5b2s5HUEWTzQqxJhVTN3oZWge0elxeKvpCf
RX3Wgm1sKI1mQ8VpNooi2CjxPptK2WyqOMtiaBiLwdreCfJOCA+lGUh3BenaIN0XSDce6f5A
Xr+Dr0AWiNNdtEdvTUvhnwTmagfoD96c/jCwJhlYm+x/AKwb9ijlBts20iEJ7M/Lxko6YWyg
WXhfQj2v6u9QZ8jrI58qcGtgzgqG/wji/pD2KvzZaIsW8Hfiv1EtvoQe4ruh0y7Buy/BuA6k
IX4NMG+gHWxnMGYrCqHPo8fZEerLYRfwS+IbvQfm6JPilB5JE/kmfAeRGF+RmN8qYG6sQP2A
Q68groOPwGWEpa08FjRE+E98A/3YbErnkzCORlIlvgHzx2CMwy30hJob5fjYSeGoTxzoAYJA
CAi23CQwFThBTdTvSdRvtlk/Ko/16T5+kvys+o236tcU5ScW1w82awWqCqpb9Vtt1o/q8lDa
pt3E2HDRVLaRJkGXmMJW0zSMlQ+xLu9i30FP+Rb8RO/DfZ8do3e1nfQJeBrPang2mLnEUbZR
HGKnxRG2WnyEdEF41mDfYe39FvxE5SErz46JQjz3gLZTbGGLYXfdoMYsRZxnCVhbOmHMxItv
WTLp0F0CWS9xjiViPC3GGLlBm1gKDWYJaMtO0J/ioRsm03Ske4n1okEskXJZgfscryzcRj+Q
Ax6w3IaiyOgODlFfxSBKNLaA5eAjGmA8h3VoOagnPoc+l+nXlTKNSTTA/hH6rFDRDzQFUSAB
dAIdQC9QE3AfuhoXqb5uUEfbv2kG+j6JXRbDIe8p9Q2pB8g105ZFy/RUsUevQkPwzS0E88Eh
RQV6215Ba+lx/btiDm5BS2Bbhmv50HW+xJya/d+idftP9m8kPnsuDn5BFIKL4JoJRWFNvR/U
+Ms9j6l3wbM3cZAWl4W1F1FDusX2pdgB5oCt4KQl+xlctvhZynzWl8b8M3EarAWnwBEpx/oS
BvyKbRrogiFii+X+pGRT7iBBuR77YIeXdMuNl6613pyWrp4tDqDtW/wHeycmnr2OPPEL2Ao2
gN1gJ+QVsfaXA5V99hdiQSRIAObaf/ouWHsCRnmaXopB0jX3AbBewr2ncbcP68o39BgbTqHg
SWnPIp9Ui8n6dNTNZAj68hnYeHWwpj0q7VhfG93XDodtWQOESmxjioG90Z39SNuhRx/hnbFO
rVVs5bF0nD9O+7XV9C/tCLVkZ2AbPU4f6kNpJx9NO8AR2Fn7LHcv1uORmEO2Q9/aw510VY+j
c7CNs2C7fgkbZAZ00d8lejYbZ1FewvdpQaAhD9ScoDNgoJ60NUC4JrQA0BSEgVii29clbD1V
s3gdHIbt8oCPzOR52ILPUyiv5b7A/gG7IFtry9aLlWAFr+s+Ds7zQPdJHih+4Avh1nH/jDUv
A7TlC6H/qr1bwVHvCZ76g08sIiQotyLyexfzdATcVWy9VlnCF2pdwEQi9z8tWlm0lKB+L4Ld
KKsj+vwI/AlI7wfC+MLCc3xhUXnU4RbqEKFDR9M1+kPWBnnHgBEo96b2sRYIO/AM2ssPz8eC
GRL+K+VZ8f6WXRcOeRIvoFpme2k2ex+x2d6Hvrb30Zxwt4MDkC2zHaN/245pBsIF4AcQo31L
u8FX2o90HPxGN+kgOMvsdAr8wcqhj8uhvMV0FPwE2TFwBbIj4CIvR0fBT1o/OgIuainIJ4V+
0/5F34IibQ/NAS7o6d/xOlo5uJ8CWIgilO/SmujVMG6rYT2uIq5hrr8P/iAT6CfVKBjt8xva
JwjubbhVtX5iDd75At6/smwL/SDWDWnjSNuhoXCrvXJB0bDnesIeCca8G64fxbx2mNrzjaK1
2vfOpzEsCethLMoNpyTbmzTfCEcc5l/o6yOh2/eEvdMVdswD0m6FvdFT2jNYmwbKOVjNtXKP
9zB0pMPo25MU5reZ0vyqUZrtIUozOlCa/T3YR5Vgw2BdgB3VUs3tZe0z++z/e/flw4vtKlmG
J28ZZw/HHP45+Us7u/S6g3LOMZ+9dY/d5ilL5qX2+yshD+g7eIdznudLr0N4x+aIG4c27cWf
gI1wXqRgjj6l9xa3kVd9ae9jXWsi7UPUS5YVjmcaqjrJMwwF1h7fc4tLmN9Nd1fxWikGgAa+
5xSecwkTMRt8znR3FflunjMHPVwssc4dYvgTojtIkHaph+LzBnEDXCn9ftZ5QorPWUKyniZW
F58l+GDuW6xQbXBeNDdqip/BO+Csz3lBru+ZgbR1vWcFxecCcahvNN8v6utNaQDKbGMEo+x+
WIO/x1o6hqqgDezQd5OtfbbW0NfVvrBauxtjPpd7uE7o1Y3En3wFdIq20M3fFZvVXoS0javD
nqhO1dUeIcC8kKr21taSP89Euw8mm30gytsLe8+u7EC5T9pLreHVaYjvfp6y+T7DOPDZq/bu
y66gBz36AN8p9krbU+ZrxUd7nvHoFihju7RTPc949j695SAPuK301Wps1pN19jxfej8V47Ay
64fvch21ZjPpIVs26ibfKVWMxrs3U+87jxZBf9nq2es191uFgG0cwEfQQdgFgUyIa9pvCNel
AP01ypd2Kdpvr7ftq4uB3rY3dacRlju8WGcSqKOo4Nlfl+u6TxtY4DuqDvv8RFGRCcaAd+9Z
9Efb3ACLtRPuzqCxssVTS+89ixzQ/469ZWs/2dpHvgGus93uS8V7ycVgPKSa48J9BpyQdQIy
7/HFe7jipO8+rtq79ezf1oVOq/Zr3TfwzJPsLbFapZG6mxxHcm+6LUUhbiniwvSOGLtfglg8
s1+daWjsCnTiBzHuW6FdE6GvYsyq/ZI3qQK+lRx1vvUW5DfpMehuD+tZ1IDnU1ueJJrIcyt+
mVIwbz8FfY7xQxRv6wv9bLyIkjqcsQP6mj+eNc+FHlb7ff3hpmOdKDDPe/ga6GvynOYpsvG5
1BJUsX9BXfymYQ7sreydNNsaircPxncF3VK7JEz9sKxzIkv/VGd31rka6tTMo2fyp8Rl+8fI
uwfmPMTZ2kPXHAY7XO5PltJdUc4puUflfdY65/KWhfqqfar51JHvgk26AO9gPV/67Ay6aBDi
0rF27YRuF8nTRRaXe/i6KEJeD/PL4jh048flXhjWOllWLTxTR9rVrFDcxDdh51FkxzcxVO7H
yHLknpuJyCxxHpmFOd10P/bRwzvyPHcR/J2854+e80aFmAae0S65mXxnz1kiPyQGmeeJ4hQI
AQ/I/TkPxeeIYg2Yd8d777f27orPCB/hP4oJxWeEPqjzQXVGSDzd/Zs+TSwG/cFLPueAD/qe
BarzP88ZYPF5XzW8y4vIi1SaiTRYthfeowo7415g1ecR+d7qHWW/ybGehHlnC9qidRnnb2Vw
x9lbGdzL+c89nftMpVC/3ZjH3oQdMQX+Xcq28NgYXltD72YR5UXG1YDtcU94048F5aiGX/ti
GWxHb176WdjM/iZYW2v4lFei3P+0Dvw4dBNzbo8Bcn6y8UXWfN8M64lL2sNY/wqpudr7l/uu
MSCMulprinlOmU7d+GIax4/Rk9Y8quZs60zypjwbkHM++1EAZUvXh30n5/fRFnIONtSa0wX+
GtTVeAJ0A5HUCXP6lz78gbm+PnsJ+b1ET2OuDucbUM/q4mvU6VETimT5oiXm+gDQSdn5Y1DP
BHoe8/s5Y6u4DJv7HE+mkWqdJczPWH/Bn1LHA9tBNbxvoNIFjyOPEKz9eE+5l4y8s7BuXcA8
HqfW6HkY83jG1gvr8MeUbG+I9rsM3eMTGm5MANeFnNOH6TlY967iG7iKObA69ZPwE2KbcZ+Y
qXSLSlRTrbfNqC3KegzfaTvZ5mjD86yOcOFdW7NfKFjtabegNkoXQJ9BD0jR11J36HvlMXab
Q8cJQly6il+LMg9jHThMjyO/gfpjNAHzFTM+oAbQGT6H/GVbBZrNu4mrvBHaQe7BH4POfhzj
AXWTe+UyD6MRvSj31KVNDbsjXdnVP9JaH7t65j3Y1XuUTb2Jlkv7WtnWll2tbOoN9Ar4XLr8
Or3JztF7YCXbSu+AZWwsrQYvQrZMG0BPstdoud4TstP0BjtPb7OuNBHuFuU/R89oP6COF2k/
4qch3V42jT5knSge4yePxdNONgVrdxbtYP0oUhsgftJ+FxeRvgLShWCcfYY05dk56ANZZIe+
NcPWDWN7CebJJdClPhc22zIifQ4x/Q13Pq/uvsmuu2/yKdAzPhEMukIDfkC8znXaBPfftnQa
jn68xZqIWxiPr6BN7Ao55tthDDWA/dUR/X2V2mhuccz2HL6DePUd2VCXa3wCdJhA8ajUTfg+
6CNRGLfPYpzttL5VqYupb1R8LvexlI6VLk6ypmKiPgF6TVOsKedoM9popWITuWRbyjNlbR89
oM6V0VbaHBqkraedaN9lyn+OmmrQJbVnYDPWog3ynBnsZefFn2jntXi/5bK9eSRs78Y0TBsq
vke7z0deI9BnryDuU/A12rQre5TGsXlgNRgBXf48HZZn2WCpPMvWfqE3QE/GwSxaqc6qp9NM
7QCt4s1olc+5x4vWHkAFtoBugR88e616Z3yjnelnlqyNVefY8nw7GeOyjvtLluq+zXqCx1BX
gDyGA7mvMLkUj7P1WgDLpD1aX9SvMU1hz2LMy3KCaH5p9F4lgaw93LvRqDRIL93apYG8Gtw7
gLwd3LIoXY+7pWv3F/UoSx4G9w7+23r8Rb5OuHfwF/XrDLcs7rUed2vnWnDv4C/q0RVuWZSo
B8ZXfwnsiNv6Qs1fnt0hnAiagzzFP2gqS4X9tU997zl8ofs4vr8t1p6gFz1GTAdvcAa9uA5t
BKt4LeqDuPX2SvQ1WM2+ENfYMnACPCuWwX9GO6VVsAiXsJlaC4uxEqKif0p4Xa1qCWppFRR1
tRYWjRUe+XUtoAS16IZC3vMIJNKEVklyR751tSbgEa97nVaAPpabAB2iHnue6qm9C3Uf1Nrr
ggu7aane0/0h3Bi+kZKRZo3+BEUa87AuLqfnVbqamCflXYbR1JOPhu3cFrb+SWqM9TIe626Y
Xgm2s3nfzGa64hN192Ac5mu5ji4QV/Wd8C9HfyRQkqn/iAiZhzw3t+4pVjBd6MgZlMoz3BrP
gL4rbYCXqDf/HvrZ71j/b2G+Pq309ThrD2sE6ONzljIHjPqb85a7PmOL8jIC9PEJzwGjpJ9f
EOd0l8gGw+EXcKeDmfC/DS7rheKCcUhkG++L4UaG2AgdkBkHxCQwA+ENiF8PLll7VBcgzwS5
ZaW1FVCKrUBcsI8XmSDXfr/YCBmDfxKYgfAGposf2VGRBXLZYBmGrXxUTAMzEH4T8evBJRAL
xhlR4rJNFy+A4ehvO9w1YCbkx2Qc+pvx82KjUUm8Ctbpb4kdCPcG6zBOasp7q0YS8qiMPCoi
j3fFJiMJ+VRGPhWRz7uiAPHHwXXzbs5fp7X9ToG232HvbhMv2LeI4fbeYhNkdoTXIDwT4QLv
vZr/Qzx3dO6G997O3xMBavwnmHeA/gr3Van/wN+1WCaqAoTFE2XcJSyJvC8kKb4n9P+F5x7R
/wX/8dndPWLk/j3F+w9lU3IP4r/HOPv3mPeO/goRBK6Xkj8CWXeQ+3f3pL17HnJPQs65/3u3
MubwS3DD4Arzjtz/Dlvdv+de5nzvPOyZs/vJObrkPHxP89hsrBNZ4hAYAfqAwxZzwCjlP4j5
/CDm87ki2/4y5rq6mOMPYj5/CfP5S5jP64kN9moUaK+G+fBrzIenkWai2ASZHeE1CM9EuMCj
f3j0Dr5Qs5fQMzz6ha9eAV1CPsfrIE2g1kiegcI+iAWJoL1Rk5L0GNi+NdV9v3pY55NtK837
ffo8ecZhnXcU0jJ59mAUwF6PhM7wID2t7u6ZZx3yLsETeq44bLxLb+gzabe8rweSjXdokESe
xch7g/LcxKgg3kJ+yQqks9vh+pxr8QsIH4WeADx3DeVZlPe+oe+5jLz/57k3KBlBA/AeSfJ+
IM/Feos6qbOVmtTO1ha0pG9g039jOyvesoegLvIMLRjvcBhtIesl97RP0TC1R35cXOFLKNpz
hw56VWvvfblY6qX3xbz/BWz9X2GTdsCcAT3INpai+GLYyYvpMb5JfAB5a36OMuVdONBaX0Mx
EpXnJwiHip1yj0Rvo+6cZxo5sJ3luVV1vIt1hgL7NNK8a0H1zLrAvjXPP3LV3WrPPT3AZ4nr
8rxD3ZeWe/B74SZQDXn3Du/zb9TpkLqjJ/NuiPdfRIv5blpsqyZ22jqiHnLPZhK+Y7n2RaBu
MzFXyP32/er+5KP8KHU0XOZ9Sf61uhcZp+5GhqHOKzHPfUcdbJ3V/170Urqd3DM1//fhKX5R
fKl/QtXlHUiJXg7pD2LdBHIeU/cwkZ/eC/rHGOS5QOl+C221i/e/5d45ym6nt6L6EuvuJlf7
3Z77m567mVLPPEsPoy/qgUgQhvxi5T1Qde8yWFzk16w92vMUZoyhmhgPk/kgmmzsE+tsgWr/
/Cm9G95hKDXRR6FeRORH5r1p6bK3gfz/rR6QJcHdCRaof/+yfsRXoLZegSQRoLK8Dyhtcp5G
Mzy2OtpuFd55B+Kus5FUXr9C0zz/ywUdXcdzAXLfzwincHsipdqaU6q9BoUbN6iHHk4t5Hfo
t5bCobO/pU+mWH0TTVBnrhuprszDFkpDwDBjHJ03FtN52P4hdo12wm2tp2gn9RR8ryR+hxq5
y8TjF7/by9ECvQ+tk98zvrEU/Zj40ehPs/khykCdhuqNaKBeVWyH3t5MDxBnMIcM5mHiNGyY
tWCJhKVqT1ukKtZTF4l+hkbar5O//XsKtr9O3D6ERuAbTTYCMKeugfsh6fZo6GmHxQ5571ve
DfaLNL99mVYi38/IpmcNwnfZVBww3oabJ/bbAvCt9he75V1ofDuZ9jhTL7K1o64yvfpe11GG
sRv9DH3T+BbuZXHS1gPjLk/8IO948yJ61f4r0oTgXdcCpEeb5vAPlF16TO9NPcw+difL/+GD
zRmsfYD+70/L5f05/6X0lX6c5rDjNEUC/ya4uVL+d8CedGIALYH7m+nK/xXAXL5Q64A5vqpF
qpJZftaTzlrrQB95X0K2sZHEymPef9JK2wFpXkJWNUGCRTTieoAH7u7Se+BVpB0HJuINW4CK
3vrEaxGQ14L9vYrfp5EMKxZqD/OOcCXL4QdsNF3m/bTOSD8aPAMiLb+HRRLYIePBfNgiS2CH
NALzMc7bgJ530/Xupm9Zc5DibvoE2vkR2eZaftEkuOlEhfcDWOK3r8ANLQ4XVgE1QGuAT70Q
bVhYEXQCAaAVkHfuZfimiXsmOAiCQVfIfkB8XQDX7YC7A/wBuoGXIRsIloKnwBqk/9rE/TDI
QRqHJfvG4ksw3byfdHu++T8fRZiRCtFfhWMgQ/m3nwXIuxD9eLsDmA1WglngNOTL8AzyLkQf
FJ4F6Bs32sXdBYwEqxA/Fewyn1Fl4kWL8sBugLyKjsv/SQGbkeZDuH/iuTQg3ykDYHYseg0c
Q9w1uA1MCgch7nGAuhf1BKhboZD/CwMZ4t1ZRLeaI88+YB5INN/pVjO4G8AZKw5534pG+nKg
IwgBvUA+OAAqmO3vDgKdrbyHAEwv7vZmX7j7muUXfQR/O4B2cyNv90JQw4pHX7lRnyLIir4A
8r1OALRZIVaFwpOoy0Fr7CCfwhvwn4Nb3vp/mwnWuBmOZ+SYQH+486x28DDU4lGL50wKh5kU
vWNx2mKlxfsW5yw88qxSvGKi7tnLsZZkUrQa/AT2gP/HvZlAt1Gdi39WjTSj0TbSaNdolyzZ
lm3ZlhVv48R24iWxHVuJnZ0kJCGbEychbCGBspYCZS9lactSSgMlyCGEpS1tDa/tawptU9rX
lr1ANxdKoRDA8v8bXcmOHQpp+875n/PifP7N3Ll3NPe7937LHfmv6N45cHkTv0d6+1j5O6DR
Ag9D+fyCQL8mViLJzxdF1iKZaFQE1vDn0V4PEuV9Fzk2uWLG3+sV/hYQbODh/59C7cMWgN/d
gZ2JWR7WkEeJ87KeJukocS7COVkPB9iLcHbWMwewB2E3qrIr66kHjGQ9DYCdCDsQhrOeRsB2
hG2owVaELVl3C2AzwllZ91zApqx7HmAjwgaEMxHWI6xDDdaiBmcgrEHXViOsyrraACsRViAs
R1iGMIQwiLAUYQlCBmEAYTFCH0IvQg/CoqyrFbAQnXUjdCF0InQgLECYj9CO0IbQmnV2AOZl
nZ2AuQgtCHLW2QVoRmjKOrsBjQgNCPUIcxD6EdLonnUIKXSzWoQahGp0zyRCFWpXiVCBkEAo
RyhDNytFzeOoXQxdK0GIIkRQzTBCCDUIIgRQOz+q6UPwIkgIHgR31rEI4EJwZh09AAeCHcGG
rlkRRFRoQTAjCOiaCcGICg3oTI+gQ4U8ghaBQ2ARNFl7L0CdtfcBGAQVAo1AoSokOiMQcAQs
D3wSIYcwkW+Af4zOPkL4EOEEwgcI7yP8I2vrB7yH8G7WNgD4O8I7CH9DeBtVeQvhr6hwHOEv
CH9G+BOq8keEPyC8ia69gfA6wu8RXkNVXkV4BRW+jPASwosIL2StSwC/Q/ht1roU8BuE/0GF
v0b4FSp8HuGXCMcRfoGq/Byd/QydPYfwLCr8KcIxhJ8g/DfCj1HNHyH8EBX+F8IzCE8jjGVF
sEv4D7JiM+D7CN/LissBTyF8F+E7CN9GeBLhCYTHUbvHEI6iwkcRjiA8gnAYYRQhi/AwancI
PctD6OxbCA+iKg8gHET4JsL9CN9A7e5DDb6OCu9FuAfhboS7EL6G8FWEryDcmbWsBdyBcHvW
sg5wW9ayHvDlrOVMwK1ZywbAlxBuQbgZ4SaEGxFuQLg+azkDcB265xfRPa9F97wG4Wp06y+g
BlchfB7VvBJVuSJryQAuRze7DN3sUoRLUM3PobtcjJpfhHAAYT/ChQj7EC5AOB/hvKwFbDJ+
LvqEc9Ct9yKcjT5hD3qW3Qi70OeNoOY7EXYgDCNsR9iGsBVhC+rKZvR5ZyFsylpqARsRNmTN
FwPOzJqVubs+a94PWJc1K+3WosIzsmYZsAYVrkaFq7LmCwErs+bPAVZkzZcClmcFcML4sqzg
AQwhDGYFFrAUYUlWADePZ7IC+Hd8AKEfYXFWADeP92UFcOx4L0JP1qQ89aKsqR2wEKEbFXYh
dKLCDoQFCPOzJvCbeDuq0oYKWxHmZY3zAXOzRmVRtmSNgwA5axwCNGeNywBNCI1ZozJbGxDq
EeYgpLPGOKAuaywFpLLGNKAWoSZrVD6oGn1QEqEqa1Q0WIlQkTUqikwglKNnKUMoRY8UR48U
QyhBjxRFiKCHCCOEEIIIAdTAj2r60CN50UNI6PM8CG5U04XgRM0dCHYEG6ppRRDRA1oQzOg5
BfRBJgQjamdA0CPoEHhURYvOuKxhJYDNGlYBNFnDaoAagUFQIdCoJoVqkqiQQMARMHkSOAn1
csAJkI9BPgL5EMpOQMMP4Ph9kH+AvAfyrn6t9HeQd/TrpL/p10tvg7wF8leQcSj/C8if4dqf
4PyPIH8AeRPkDSh/HeT3cPwa8FWQV6Dey3D+EsiLIC+A/A7ktyC/0W2U/ke3Sfo1yK9Angf5
JZQdB/4C5OcgP4Pz54DPgvwU5BjIT0D+G+THID8C+SG/Rfovfqv0DB+TngaO8aXSD6Ds+3D8
PX6bJE8+xW+WvsufJX2H3yR9G648yVdKT4A8DvKYdqd0VDsiPardJR3R7pYeATkMMgrnWeDD
UOcQyEMg3wJ5EOQBkIMg3wS5n7tQ+gZ3nnQfd670deC93AXSPdw+6W4ovwvkayBfBfkKyJ0g
d4DcDnIbyJe5MulWkC+x90m3sPdKNwNvArkR5AaQ69lN0nXsxdIX2duka9k7pGvYr0hXQ/kX
QC4lQ9IlZJ30ObxOujhzIHPRwQOZ/Zl9mQsP7stw+3Bun3Nf177z9x3c99t9sknFXpA5L3P+
wfMy52b2Zs45uDfzOHEltoG4Qm7InH1wT4baY96zew/57h784B68dQ9esQcnsD2GPd49pHZ3
ZiSz6+BIBhvpHTkwcmiEqj808vIIgY3g7NHJp0ZHnJ52oHzBCG9o35kZzuw4OJzZvmFbZjM8
4Fl1GzObDm7MbKhbnznz4PrMurq1mTPq1mRW163MrDq4MrOibllm+cFlmaG6wcxSqL+kbiCT
OTiQ6a/ryyw+2JfpqVuUWQTlC+u6Mt0HuzKddQsyHQcXZObXtWfaoPOYy+DyukiD8gCLXPAk
mBOfW+GUnS8733ZSmPOQ8yknadI7JAdRorfj83rs+LB9v/1aO6m3PWsjZFtJabve+qz1Jetb
VkqQrSXl7ZhoEL0iaVH6Ji4caM+zuRWxsibf14ViINyut+B6i2Qh2iQLjhlfNr5tJC3fNTxr
IPR6XK+f1BOyHqrrdZKOUH5N6khZV5lq1/MSTyi/JnlSlHkoUe4Y0fYOtOs5iSMyzVwPR8hc
87x2mSuraMdI3IvjGG4AkGrlKXCL1A7relTEaRz8+cMD/fF411FmcnHXIXXv8kP4FYdC/cpv
uW/ZIdUVh7DMsuWDD+P4NUMP48S8gUPmrr5l6PzSq6/G5rq7Drn7Bw991T3UdegAHMjKwSQc
YO6HRWzuUHzVrj274vHdq+DXql274/n/cIbvUc7iSqHyf9duOFd+9uTPsfin/kPVAKt3wb/d
xcLd8f+b//D/o/363/pnW70KwzBa2dEhf0PrMBJjsHosgy3Beh4pE8tEdUMLi49jHRiDr8cI
zIt/AVNjOL5eNlFEKKUi+5y8cUcf3tfKEANY8wsvvrDyxReOAY/hiRfGnx83TDw/bkqnE4nK
CtzoM+bFrCMYRqUK+MuJVKq2NpmsaiJqqsuJgF8HEq6pbiJSTWSyykPkq6Ka+VKorJSSv/l4
OdkzoSLOl9q2LwoSklNn1tK4l5as6saeckHvq4lG5YTEsCqCVqvUJXNa/a2r5jhyj5AMx7Be
UXToaIrRqjVeu2DXUbl2WvfhO7Tuo3nU1o9uJCurNy6upb/EqglKpXrSaQ3Vt/vsca+gFwxa
HS2IJhUjmLhwY+fEVWqrw8qwLKM1sBqbTVRrWJXWMFGHEZM/nvyQitBmzI+FsW8/TuwjLsQG
44oVyAzKc2wGAV8Y0vJBnhfDHBtgA35bMMjiYjAQDo3LHJySbpbHRSqKaXGR1GpN7sWmDJ2J
xm3Nzc2mdAJbvWpl3Jo2WdNJx8LxKmMST4xVpe2JZDJp2Hf52JgRTxoAoPW4U/b9+7etrBgK
icqwlBMR0kfqSBigcG0KR+NjZQK4jwqSpBD1i16jGq+YeP1+mreGnJ6gTsURdzEGR9TtK7Gz
xLV47i78qUbRqaNIRqvB63M/ZHk1SeucIpXldGqSVOu5q5UtVhIbwDDKCXPRg8WxWuyqmdp7
DCslUqMsa8GOEnWyQaoMiRY6PC5KDktFhTGkxGCOvkoIzEZl44DSMehIM8zBRBrm4XgaTzxT
lTw+bkwnxivBW3H/QlPQRX5CekiLWUcFfP5wSoAZ6QNFMMr0DZDKTCarw4UjyulrXJqKdVS7
XenMyNUrc/f7fJo3mConLq67bKj0UbGyq/FI/w96NrRIkbPPf2HZ3xbv7I5SpsZtK9qt6ljz
kuqaLWf0N/l9IeriiOSTV63wVYcsuZXVfWsnXu1fnqtLLNygvKIcBG09DdqyYRFs/WxdYURK
1ti9kkFv0GvyUavQ54WofFTWnNzDolpAJaOfXhEpQQW9h9V7avcp6mlTpGloz81HL8q9wlsN
KvoNJuHBjTeNfa7lSMnglTsP/yh73j0XDtY5yIaWq6++4vxN3THG4DQrXWw+58F9nRcMJT82
1p952Y23Ka9alb7poG9l2AOz1pBBYxHVoqiORhy8g8ciGoi6ZVM0HokegpjA8raFgEDC4lMr
PYn3iYBR2Yd6gsZUmeo74zCy47B0FAtlAA3k1w4o4TFM82/fDmkI5gfpqxIts46mtUbpcJrR
Gtkcsxgf1WpJSs0Z2NyiVQTJ8kT+ysT1nEWvot9kKqzEmVZqnLbYHBY+t9lgoC12m8DnKg1G
lWizW7SM0SkoGgSNbZ/8KzVJe7F27PGZGjsci5dizqP4W4+UYl4vJhwlUkfScRvD2LRP4BFM
xiI4KetdzlIXhrtcOEZWy/02SPhG5eolxQkAdiGRSBjTacO4QVlCJpg342PphOH4+L7LdXnN
PfIf37KoP3/eI1AWs4dIVtWmBF/eNVCgOpEhVSpGsUV5v0CBKaKoSZJWs1pGn4Roe+i2izfM
DyXXXDHQdPmcrtwvtTxJa7R6DX6by86sp3i1pmP4qu6Ln7msvXLF5Q/9/Lz289bMtampixiL
1S5wwbJQzcr9N90zMHj5ioTbg+81GhirzSZwYW9OJ1g1mkDQOe/AkV1bnn38zpG59kBMNCtz
dTFY/HfA4idma14WA1reDz82a5BjQ1gixFpji4MBSKNlt8zZQgk/5bayGH8aZnnMsXBirBlP
PPe9qqQyV3Gb4ZlkVXHajv5nt1WMPdIqaJssHiFTz5C+qaMPCM7ic9i8goocmRgdIVjRb3N4
TSriA1wr+uw2n4nGNxLdm3BOzFejCTujZWiY1AzRPPG94jH1u+LRxAmICArHSJP4h6BJC9Y2
S5N6C8axFg5jKdqwuNATeHywXsmqvDk/9drJnSp0AEJ6bvqRedFnU/oy/ZDTD1Yc1/3wNNXY
3llPE6YE2mTyUDEyLsTMJeYSyVOx2GM20UIsLpVo7MHF9gxfVLc13Zw3skYwomPgWWGuJxX/
6pTNn9oovxxUDI6LiglBnhg/ZXAKDpnabxEn3sT7NYxaCDhdAQtH5e48kO+t3VcYIL8NBkiF
7yJq1YI9qGiBof7OeywT707ca7SoNTo1xEa8hrhs4lw1UoOa+u3USD1FNGl4hqLV2oJ9JnHQ
jQtbMks3vM2uw3jepiPVwmL7UbxkVFYPnLTo8cQxNGaP/vM6ytBNW82peVglkjhJKzHXxA+0
FnAxb031ingJf47ndtGiwyHq8lbxoeKTf/RVk+ItldGMgkeRYJ1e/EneUusVompNBH7MQvQo
Tj5qtgoatVoXgbjgEdnap0NjA4+oBAbIfxwrLEFYjXkf+hgWPZ2GRUsXmBrOfDQsWj0kUx2O
hMNFnxq11/affeum7EqCtfrsVq/AEH9VV/kmqxYGa5c2eI80yrY5vrs23D1/bWfSqydfrNk9
vK47nitT+q7EudTBqJ9Ra6s61nQ3DcFwT5zwVrd3LSzqIwz6qMSasK/P1McRq6jW0lGIswZk
viqadnvq4KckSqcVX6srKdVGPaLGqmbc7kAddPJRubQvkDEW5i7qp1XpZ3qmhiaM6ePH8mP/
8L9+q2IQJopW4aQVQZaTM9U4KyqjwpGevT01c001JM2KEZfDa2SIpNpd3Tdn17BiwOxWn4kh
3lZXuHH7iqtWJR63JfvTo4NfGtrXEyIn2y7Y1GcXzlufe1Xw8RpeTVGsnscrapY0ByZ+PaXl
hyJSsO3MFf45MTHXXdGzXlkh1OQ4eSvtwzqxsZnafRIzEkmsGasl0jLvaIYfLGSsjbZKHU/g
ShIWxDFZV4oxBobQkkwpU1qpVXZTW/shQI2OytKUBwWvCS5UseV5F2qKK9EcimjgXHHJ/1u3
nemZCfDMqsIAkAU3TBRyOZWSrilumbwVYhkI9LlI40CqcUWTFGnuG1jcHGm/6MiOxrMG5jhI
FcPxGkPF/LVz27d3RcNNff29TZGmkbvWVyxtrzKpqQfUilPWOtyOUHNvvHRubUVVuusMOXPT
cItF8jnsKtFht/DekDcyb1mybF5tuXK5pefzmxoMVqdJUMbgbpjju2CO+7FFs6yUBlOrbWaN
oDYfxcOPyNL0Ip0YwxPJ548lDceUefpJ16fjvCmfOR2hULtwMJEQ3d34CjhLv92u+JqXczfr
WAhTtHqWvIRnqT+rLDanmf/ozik7u9ZkYCwOm4XPP/f3Jj+k1fkc8oxZz+3CrH6rKLIW1sa5
F2OsaPVzFpt6huNrVmYBuBhjsgr5GeM/rTntIyNkOD9whFVI5n2KKKoYYo2Sx3m8MRuHP0ri
xoDkCZgZ4hacaKF5MeSRINnTeopJHPW4YNNSpFrHfvQU1VJM8pT+fBfG4SzoTwwbntUf1olB
jKLlON77BGGFClaiXDbIfGixFnOSHK4yLVYVHjedzncNpmhCsQpJ6J8SMzpl3T+rrAzU1BiR
kL7Wog6CCUnW1iLHku9m72oi7ylhrPA1v1ORhlDA6TdrqI0mF08EO0veU+ltQU8wzGl5/P2c
v+hZ8BeJ3yg7CiTYhNwdTbuaGs5uwM9idRoS1GYCG9sHNuAV8sdYGKvHrn6c2E8cmOr5qMat
9hzFHzoM5r4esotvPYrpwzg8ZeVRwiNbBUxTH3GHVaSvI3bC0Vn7gaxbSHYX/UhzwZOOH4dV
+sI4aEIJofPKEE+joTLqxW2Yk4Np0VrYaGEYcEFTIXgTkSJLqWDM7DDAbfnWlSP1vWc1WS2J
rs1fGBraXyVQ4ajZaaDwXyS2tdYunVcp6TmpNp4aXtNpsht1FMNpvuntlmN1K3Y31l1z4xeG
5y1oXm4A369l/tLWlhzYMrK9NNCWDjRuvX5Q8UyNoLXn6J2Q+83Fbp+pNdnEGd0eyRtI1aVd
aZcpbTRhir5c5UY2XeenmOSJSKfLZOQonbVd193wgcwsLNq1/IQfz+vt+HhCWR6GfO6S/2fC
89pznP5dpmxiOJLfqQoX90YYmHJM/pBiCptbDHgtxZ+Tz4mVnVuuWrrsQJWJiERjLgpnCY0F
ImePicJ7aZ1erzK0rdxe17CkIWRWP8i6U+W1O9Z0GX2Jra3VA61VPiNxScN1N1y1paVVHjTq
DHq6Tg3Wg4Jfue2OulSlKdDVHPPWtC6YX+psbyhp2nbD0q+3za3o3bhzBNZhN2h2CfkjrAa7
fNZsdLkwo6JId7T6/ahE4zT7j0Sn9x9RzG6wEyxpN38ohwo6mDieTx/Gm+EAgBJBRXmuf7Vp
waVPJ3yKkmDCKd5dFSjYVMWXLGF0glbnqeyaI6/rqPDwy4ZaVrbEDGoNpeFtDT0rKr/2FUvV
opGbz4h2ttS4GXKRKewT3UFPTWbr9o3hjZu9JV69TusLeOxBt3DPXY3X3fD5LTKE/458ZAir
lErT27BScMqz9CKzvrJmP1zQ+FOKehwWfykZaYdCjRpT6SpOuDrnzF5hygTJb6woeklWFfNj
2X7aTU9Zn1TRy1qnMpniAhXR+iwjgzGLw0AT3vz6rF9aH7IwYkXX5qsG491N1ZYNOGv22m2S
iSZyz8Myrcm0VnoNcztOXqTf8HU1l0jVbR2d0pwvXnfVlrmCr9yO5xhesXY8M7G2bUHl4s07
t5efsbFh8/VLQXMLYT7dAfatHGuYrbkjsaqUisI0RwmdrAkYtR7SbA4kjhK8bMECqu+kUjGP
0ait+lmsU/uS7Fl4UvCRgEQpMa4s0nzsB5bNml+bwmm0Ks6ogEo1YzYRMzcNIEAM59dlft/u
DvmK4zduZuh1w/KGrgqNRkOpebW2cWB91dBlQ6X22iV7b187sKfLf39vZ8v6hSnjhrOuzgSI
19u2L4r5mpzrNwuiwGtZl9uh0VoFbbT/goGWm66/bENTbG5fKtlc1n1mnaOsAcMnG3M3kJX0
OVgGu2bW6jN5jNIT+OvgJYz463Kgo2GB3FEvd4hih1xPYTHta4vmexpeq5eCpgULal+Tgz3F
jo/BbIH8XdnJym+nKFoobKggnX1201mxHcMkC1tWKKpWspGTY7yUUFyYycJePYQjZCVBqtSs
irG4wtZ4Y6mHM/6I4ymVhtMxPz5onDOwva0szVAUSUEthuH1FkOsMe7W3nOA5QgIi3j2Qruh
ITM8T6wokVQqFZ2ijBarWavWqB2pgfQyvZGzWS0G9uMHBs7vi+hUtJalBKUCSZJQoZ6s4k1q
q000cfsWn98boTVaFa3437mgccX/NmB92OFZK5tPVjc0NPb1ul2Nrsb5yuIOcyWYq7oBc1F0
qkPqa0xSQflERWdU857JZO3+ILjQ+opM95y8PYyNxwuLVvEqycTY+FjBpxjxpAkNgf/fviOM
DP2JQwCxy2m6bbdh/vZb1vRfWaLncJrhDBptsGGopXZpSwlr9HOG9hXb012bml3IUJziypfM
q5L0el9NOG8lynvP6Yn6rKygV4miTeAsDlEsbU0sP8cX6mqOVC3d2zYHPNO2uSc796r+rTuH
y+ILkp7GrTcsBQ/UPPkheQh8ewu2b9Z4BMrtwRYOYwOcjWuppmjhhJzuDNhZLFiu8pS0e7rp
7um9ESUxVFSeUDZUUEopO0673ck7Q7W1xTdQTDFUPMWPQ8KjYmCOsxbFhBppfBiiP2dcqhle
3WXsJVizz2aHYqLozCXjlDNvXTFcLy9LO9SMXc0pjppTE6WOFpu7ImBu2nZjJrezWHySJz/L
UVtTkffkoZZl1cHWgOKlQHP4W3QCE7ASbPNM3R0ukcweiIPWyhwreTxmqYQK2vVH8flHaDnY
YS84mBcXQjKnKO354+NGtAP16GfUVWxDQSmF93KzN9T+SBtdMY87bCJolckJRyGByL0/rZJR
8Ds+pDTqJ2AcWNYadrlCdo3GHvqosth38hIG9T2/79YEc2QU5kj1Kd44puy7YSRFxmOCsu1m
lmRT3BMT+IoOs8dEx6USxh5st3fzJw153hWPjTnQRoQuvzSVXbjCHpzlM1t/6j4cPmsfjhw1
2nPn4jyrVlsCDpfXzFK5l9fBzPHZQAkqAuemp8jd+NfUZkfAZvMJavKrWoc193Cu3mRnNLya
hvWjwd/J8XkNgXKmZ8fHP8fP1fAMSTIcWk/430BXFmz+LF0ZLBgnsxhr4Sja0F5YBPnxdxQW
DHfqRehralbP3vjk+W0/dd5i6HnoN8HiLsfum/U86daysvK0VfT7FvmXY8vhwyHbYev8XH+n
MXpC7uisKwfjgollnH/5ota0LtnUkex2Ta3ewvLN74HDsocwUklvTekxwDPFRNf3r95rtiUI
zzAEn1RU0ErBMFin7QO9EZ8aZbAPlY1VW9Z0KtYhX2hQ4cMMXdWQ3IwKiyp9BNcIbrPFqadw
v75txbZ0w5KUgzS3r9haN29ZnW2G2XBXO+Tuxi03LMltny70zLE3dswsJC+FCUMqFvgBP6Rd
vnRPItDdHAvPHawOtAaxohWGUZqDnT9rlMKVDoczTOlITI+bSb0uZDkh13aGnDrKoa8Mq73x
Dm+3ZqZBVVYXDAcMwdQ4iJ/dqrCqTl/V5CE1sxPmX9EEM3R142wDPEObrat2Nio6JJ6HXk/8
dFpl0hyxsetTVVYybxAs7iKIbn8GWrJiCWxwpp6UHWNJ1mA2g40QSFtQCR84rfs9obPktZOS
xfFCip5/48yeevmk2Gs6Mj357RekjD9zpQf33rJyzZWDMeecpfmjodi3LJU9dQ1rF6ZDJrFy
UV3jGcoRsavzy9deuCpVPnigr/PL1+xflUoMHlhW1ZvyxDvWDu+pq+qt88Q71+7YjRGTH+Ru
JJ+DvsUg57l+dmTkq6nV8jV8jY232lB6Hbdqa2t8FFNxItxp5W1eyuTsMPWkTye9BnOb986n
f4OTtBI5eWf3pMnwCYl1PoQp62yqFjOEBnyOFXIdfILIp0UwHXTzIC3q3ii7HoSAJjKVVNcs
nVfp0xOXzLnuxqu2tpi8cUeut2jPqD9BHAPz4qCvqyVWvXRvT3xBtasB4ph729uqBjaP7EAr
iXgH9JjEts7OHKNGo9vkwtwu7VHcJhvksk6Tyxh1R1RWf4d1yuKiFZQYm/JIj2Haz6g+O2L/
Z7ZJhCeDfvBqtWD1mP1DS+Ybe2Z65sJa8VmbO/sixoDHqlKRt1NWj9dpYlimftM1/bnhU5fI
PSXdaT/NaFQqxZZoJseJP4MG2rEHZ2rgSTAhE5DSVEMGGBfr4QcL6KtlZ9uzUS9dQcs0SbPP
yp3eE1EsZogRWjKWeFF2fvJOgdE0e29bDv4n95q586BsaFNTvn1msA3RIVXY01Y0+mcVp9do
fRXzyktby201vSt7alIbr1+W6J9XwasZQpX/TpA/tbgx1VNtr+5Z0VNTvfrSvvD8hlKOI7ey
Pq8o2Mz2eMoTrYmV1Pc3t5+7tFInOrVqo1YtKgmMU3I6yxp8sZp4LN0vz93ZX641iRyraHrn
5FvE09SDWBv2+VlzraS2NJ6Kz1VrWjQtKU08XpGypqxYxdwFqZYGdelrmrivdoH+A9k3tdaU
r7VUHUsr+6nHFKWa0oUFOzaGvj0EqeNptJ5+j/XP8+2pjJGYyhjzOSbxNKFiOZ3mjTMpVbzC
GXWLarUGckFG7Y0lrHWL65wETZNn7uO0Kq3AXxjHOXPeu9J4/A09S96gsYiikc2xlmpjMqFh
NZyelzw2htFxKltyYa3W7fXq8A95QRfyis8zWg1FabTM8yLocQfY9VfJJyEr3DNLj37OhlU2
VFUGgnYbxtmClfZAQ5UGcjdPR+kHsmEhPb1XU3iVmawaQ+90FZVZT6PNSRHHVBJXO/2OU9Fj
MdEulpXirMltMTv1NOEztK0cTreuTNs1zHAxqqTx7SoVl89H1nSZenCuWGwHbeajx/v9XXI0
1DJU42sLENXFdTzxc0ed21MZNDduvWkQv6ZYDBq6AOKDu0FDlcrb3Zl+z4dfnjWJ0ScICcMw
L/6RzMliWYefd3YUwmZTYZP++LjhhfxC1cy+XHD9YFunXj2Ep5aYYIFJUpgn5N0qKrRy5+W9
jMnuFaWwRYNfiuNqk+RweI0qfCtdv3agK0JyEGnbPEaGvBfi2W0vvfDLdZyWISi1jiUznJHh
ldcTDK+ZcGhVQ/dlx87OR8+0BsMnn4N+3g79TGDnzbZdAUKP2TGO8Mk8jgW1Noh44ccaeoLQ
QXWeCMg62RrrCGpNng5Tt6oY3KRPekWhrCtrumivtJ9YWdGFMPU9O3zqa3bTb2OmX8aUjalI
MSK5vCYVeXPudRVvC3ncQSPJ4mc/piKEMFwBJVyL61Ra0ef0hE0kj/8+t0AnaGnl64/4utwd
DKeiaK1Jhz+J3wPlFKlimdwhvBdAUqygg7G3QGSgjH0FtmnWLlXALJQ8QRhg3P34xKjNpmzu
KWoQyjsCarO7w9yl65mlhrF0YnozSvuJ9aZnw1TvhRkTIlmYDyJ5N0X7Fm26ak1uQmVyhOzO
gIng3r2JIBiwDE7JyOB7iKb1A/MlgrMEnWUe8h7Oyi5/+ld/uij3FUinoONmHZ4mh7VmBow4
zAkdO+Ffevixb5+huDctzIebci/itdjLEPH5H9Ziyh+86hjh23gfZsOiBV3EDe8eg6jumcqK
EDw12vlXHrmYINcmE6N8DMIyNck8aaUN9pDLDvndA+lddT/V87TawOHC2U6vQUXzAmi7c/J9
PJb/ROlJiClHMC0m4Jks0x0tKj+ejyKVj5sZKOIxmtXbSv2uoFlNc3prSdgdMDO36sJRv02r
FpxGQyTss/Ks4ADfMbkqdwO5ZdIGeaLtCMaZXlL3zPyAY5UVeOG7jcU3meQWZWtOx37cyLOw
mjgwut/ntbn3VIJFFDhBp1J24DgBQ/vAlIb2YRKWVnL2md+tqJ98StboiYVYPa4nsceJCsw7
+YfDUOAtO0pUHNZ7y9iA8nc0zv4KwKjMLpn5/cTx48qbAsWDgy3J3+TTW0BPoHLeMU1/hZgq
uh4lyYDZRufdVW2qiaY0nD06pydZf9+OVZcticJJ/aKk1JFZU7v6skzkodWb6ldHo00VXgu7
ZmPD6kikucJn0ZB3lO6/4c6br6hqWJBcd91KOLnjlsuTUpXPVL3uulX7zyuJRM++8rrLhwPK
YWTvldddtkPx4KsxjOynrVi58jZwppYqQEs2RUsV0MGYOS54zYIZc3CxkNpiPop3joYWxwXl
LxCmvikD6evEMaPyTbwx8MXF+BHpiUW3+cy2BV2FZgy9QKtUaAGmQkUfpCy//vwbbM3Ecq1e
+VadgcV1P8i9aTDzNM2BSemjeZPdCLElib/6Jx23QWWxwjz5f+ybCXAb1RmA/7er+74tybG0
sizflixbcSKc2HLkS76wLSdOgmNb8anEiW3ZcQo5ejGdttACaThnmLaUpqUzpR1mAqZheqWk
B50y04F2ytAZ2ukwJSQUUuh0AKP+u5J8xQGbNsB0njTf7tunt29X/7Vv9/1r0ouNFqtBzf7u
tEws0amULpdD9hNWJCIiDEbv3CHMd3Mol9+g/YRXZ6I8CQ0Z62nAPxRCg3nCYCiAAlDb55nh
x7aqvedIOeSBk5SG5HZjLSurjBpC8yR/2X/9GX/dXXguPaWAUTmoyxjUWaHbDfSxUmDpAQ6p
Ea9MY89YG/8cXSrlfamblcjVOsXCZrVBIWZVVjNp75hu99plWk99IDjeE1QqVBiR5Eqpsq5v
atvgyUiOyl07csfQ20yhXhOXWLKsBhWOPRUKLr/AQPLqj471NldnWbeUc7lFGJhlRovFZJQq
83JtVd2DJUW7Bg4cu6PnDzZeum4c75xH6e6FP62Wbl9Gun28W80zvSE17CyCuiKAojpWWzXP
9DzWqVWdw6hogUaS/3iNBb/ZwXkiCilad/oveTzS1mi2kDktXUrtxKgf1KXySPjLnyD4VLqn
Ybns+YP+t30v8/a1R++Me3HCQqjIv/ptA2HAanaw7GdsVdEj9wxU7Lmxzq5VMyLUmUzuaxsL
9xzrLMipHWm6TacXFKmcbjm+p6KrHzVXrZIrRHKtQhnqm9l+49GOgrJoon7Hvhvs5EH/6ODO
Wo/KnKOX23R8yodZ7fQ4A11D/sLGSofeKLWYLQZF2Y3j1U3d7qI8vVbmyOUUSo/b5mkY2t54
bLBBy0j9TfxMmxVHKufFJowcFfD0ai0GUIvlvBYDKNAKk9FnLJHJi+VyY7HPx/mdTjvnwzof
2H3lxayJ02A4cFbwYpaH5EaNSbNThtL11eJdQBBNveIXKOTU6DZ1a2BIB5cVNwgkFWj0wjE3
1O9yjblXp9AsPVDlI46buNjzgsDlp6oYhUW4dZWwmxcumrR4cVKo5cyUJMvldbp8DjU5c0qr
+jWz8Dx5iNwlM1mzDMr3Xs/cvRKdwSC12HM22ZWsEe/tMZSp5e9eMDO/XwjzPpLDZ2qINRiB
XlgrAqkzEai6dFsJ+kkwpIUSbSmUQqWWg22stJZ/6VPpKSzMLi3xoeFW86/K+rrQuv1o3dnL
bRijiDDVY+BTAX3C9Gb61pZ3juVRXCkc8n/Q/zqcJFdIYUgl0GWS11PPXNi7nNv7T349VtrT
UmvVqIW0LrmiMBwL7/vKPq+tdrS9eagg2yA9IPHkMNs1GtSXSq98L6fZXe05fP9gCbkcOpmI
NRUqDVaV1Ix+YLNZNLYce3Xs003uUHm2yu5htC7OgO5gt5nU790tEvk6D6HNH8BRhVHMQSW0
wMOrtdKGWlHxWmlDEdWUZtedY6w4eAow/pAZIFuVm1sQvFRXU8r6fNKCy+Zo/Twhy+NIanKZ
X/LCXxylpgRvEXpdfxer5IvClfDTcpaUIDPPadKPsDKPrjK3zCL2KVtl5+y9gzed6HQrbGWR
0dvOTtfF8616RiSVq+VKVyDi7z892W6+4d6B3ps78n5oLmup9LS31Ds0yljf5t2Nlbl6htly
bO5gd/nm/s93FBy//zvfuns6bNIozAYpXhgMSo1e03by2zc5vaWto12emtIsVZbT0DBVdizu
CrZGd/IecCb5tigi5MdOr5a1C2Vt5GXtQqmIJXqzTqyTsEr9PCk5G9rUpVzMbxVM+YIwvZCx
YGGXa7ZeEhyzNPwny9PpImK5Qb3QiwNajz03XyeSMU8v3IdWiEFBr2SuZGtEr6jchSWmd55V
45heojGoRS0mvSTLZjerzfw7RV707AW8+hXBdui6enwRzVwBo3iiAT4HzQQ1aERq8ATDehFu
mUBVzBsXB81Mecisaq4J6z3BQLFM6ruYHW2/uMIihKysP6+6+UvJwiYc4gP2vtqSmC1L3mpO
vYXEBhYfW/EzEPxmgYbNPDhgH7JWdk5/bV/sq31l5f1f3rN/d5YvMvLZrpHPtTt80aORmt1b
7F3GkqZA43DIoc4Lb9kx1pQ/YKnoCg4cb3FYAr11XbOtbjJX1r+7Legqat6/tX5ubG/h1luj
ZXujzVXO8khv0Y5ErMudWx/pYKZt/oKsotqufC7gr3A661qjC7dywa1Brrijo6vMESyxFTcI
WV1FqIfXUA+boQ3uXK2Fjow3d/CjPG9OOOXNVShwJYAqp/pVr98vLUIHfMK8q/FySBpd8ZbW
5TV8WCX09UE7puVtXBKwZI0IuSWdjWNanIBPjSNED1oXPVdu87bE73zqqGt7VbkxK+O7nq1t
/pH7ptut1fcM7Lql3f0DkzcS8LRH6h1qNe+7DYFcPata9N32ghP3PfLw6emwRKmRKkwGsVnw
XoMmcuLMPqe3pE3wXqs6y2FoSJQeO+i6obUHvTf9IZ0rYW7fOOyPro3onpWIf7V+pDuuRnb7
EnL7xlFUpfn79Uf57yXUu1eieXFttKc/PLrha6Pvo1CujeHUxjFeAjAz68OybSVZB9aH9cVP
NvbD6yP7u0tsOvXhyfnxEo6OtXG+CeCyvw//2hjumiXyQivxfG995F/56Cg0bYB316ZYB1Ci
olAoFAplA5xcxsufDErrKf8PlE0AeG8F8P0VwH8GoFICEHgAoEqGvASwdRwgeIFCoVAoFAqF
QqFQKBQKhUKhUCgUCoVCoVAoFAqFQqFQKBQKhUKhUCgfN8AAEV7cNgHLlxgHSBiF8CY3XK8P
uxPZjVxiL7Ovsf9gX2ffYK+w/2TfZN9a1VQEelxaYRMuC6AUfLjeBjXpX3uRvdAPw7ieEWpu
WXYULBOGaImO2ImDFJJOspfsw7oJMkmOkDlygnwJt24nd5IHyFnyUyxfIL8E+lkmfdKMyw4I
gRg0KH0vBKEOdkA9NEATNEMEWqENOqEbotADu2APDEAMhlAfIzAKYzAOcTgIE3AYJmEKEqij
WTgCc3BzMon98v2Vr6O//Vf1d2hVf59KJtkitph9Knk++WzyueQfky8l/5Z8OflG8gpIQQZK
0EEOuNhs+CZ8Hx6HJ+Hn8ApcgTcJISyREQ2xoY3kkHwSIi2k4zqYPguQfON9W2jg0VQ7/Axn
9sGzn8OtzPlUwAvpMgtmokqXRVh2pcsSLFely1KoJq28V4vkfJ/kC+kygU3kYrrMgIaRpMss
FDOmdFmE5Zp0WYLl8XQZz4c5BY8Ah+dSDn5cctCOWhlCbUyiPiZRT7NYF8ZSAnXEL2NYE8fS
YdQ3h/qewC+HOo4LGp3FvfitEVyPYOs5XA5jyzDuN4Ft9mNdHFvEhXYxZFbok7eJQ7hOoEVw
wnH5X8axdu0zGhO2j+A5ZVoP4foQbsfwzOLC8b2PcBXl/gquPT6UmJyZHJ3lwpOJqclEbDY+
edjL1U1McN3xsfHZGa57ZGYkMTcy7G3taGzqbCwJxybi+xPxssgsFobWX5ne4uIzXIybTcSG
Rw7FEge5yVFudnxk2XmMJSaPTPHVQ5OHpmKH4yMz3o9EC63o/Y3om524LFmlE771GEp0QtDC
+7UsQ8+eTdcMXZeWH4u1pC6S2gnCYXz5C/oGg2sfDALIL+sZ9CEieKJ4vvv5R03fGNBuewts
MsE1z716/Lf8+pkX5r/4dmDhGYVJxl/h5Jmr8X8EGADftNFHDQplbmRzdHJlYW0NZW5kb2Jq
DTc5MyAwIG9iag08PC9GaWx0ZXIvRmxhdGVEZWNvZGUvTGVuZ3RoIDI3MjQ4L0xlbmd0aDEg
Njc1NDA+PnN0cmVhbQ0KaN60Wwd8VUXWP7e9F0KLNIEgvPAIXUEEREAIIaGFkhBKEloKCaEX
aYIlgiIEcBVBRUVAXQuCvkRFXBu6qCiusq5YPnftBRUUdXVXCO9+/zNzz8vLo8j+9vsC/5z/
nCl3Zu7cmXNmJmQQUV0qI4syR2V36fbbP3a/B83fgfyi2QXzKm7ZuZvI3UdkB4oWLwyE7tr3
NpHRl8hpUTJv2uxffx1Rh8iXQ1Sr+bRZV5b0eMl3JdE8xI8+UlpcMPXIR90+JcN/N8rrWQpF
3V0NionqL0S4TenshUtHd336c4TvIOq7cdbcogJ73G15RH9uj/DdswuWzksa3DYZ+a9C+sCc
gtnFby9c9Q4Ztk1kLZk394qFqDeqY33B8fMWFM+b+ZgZJhreGcUnkGV3Mm4mh+Kczc4lSNZS
S+sgrTIpjsz6jmmatmXan5DpptBOl8sCaER2IEApRGHXR2Ey9vnvMdsGyNjKcdZTTj1+Gj/Z
fw/S3ErRP5k0g65Af5bRKlpPt9IL9CEV0kqwzbSNHqCHKUQv0mv0Hv0f/oSvdGZTHesp8lFD
vK3j7tHwA8Ae1LRacytCDe1AtcZNcL+P0X0fvtVNCO/xNaB4lbeu+Ta0Pxsn3eNmfw67PTls
3gheX+X40X9P+LHwgzF9kEV5NIEm0iTKpwK0fyqV0nT0zEyaRbNpjgrNQdw0/C5BaApSFSEV
8+pUc2kesIAW0iJajH/zwK/wQhw3X4UX0RL8W0pX0jJaTlfR1d7vJUpzFWKWqfBS4Bq6Fm/m
OlqhmEitWUnX0w14azfSalpz1tCaCCuntbQO7/km+sMZ+foaoZvx7xbagPGwkTbRbXQHxsVd
dHeM9nalv5Puoa0YMxy3CZqtinHss/QKPUmP0mO0W/VlEXpN94j0S4nqw3nog6vQwpVRNdb9
tyTSW9eg7dy2cq+lS6FfEZVjsdePnHIlUupS9HvgUq6O6Ymb0QbNq1ukQ5tU+6u10b1yNq30
x91RPXOXCjGL1Z6J30Zb8AVux2/uVWb3gmu2VfFo/T2RtNtU+D66n/6Id/GgYiK15gHwB+kh
fNs76BHaiX/VPJpp+SjtUm8uRBVUSY/TE3iTu+kp2qP0Z4s7nf5xT18Z0TxNf6JnMEKep72Y
aV7CP9E8B90Lnnaf0unwS/RnhDmVDr1Cr2KGep0O0Bv0Fr2M0Jvq936EDtLb9Dd6z6gL9lf6
Br9P0kHnC6pHA7Am/An9fDdNpskpg6dOmTxp4oS83JyxY7JHZ2WOGjlieMawoUMGD0pPG5g6
IKV/v8v79ul9Wa9Le/boctGFndu3TW4TbN2qaaPzEurXrR1fK87vczAzG9Q5PTgoPxBqmx+y
2waHDLmQw8ECKAqiFPmhAFSDaqYJBfJVskDNlClIWRKTMkWnTImkNBICfanvhZ0D6cFA6C9p
wcAeIy8rB3x9WjA3EDqq+AjF7bYqUBeBpCTkCKQ3LU0LhIz8QHpo0OLS8vT8NJRXUTt+YHBg
cfyFnakivjZobbBQ++C8CqN9P0MRs3167wqsS3X5sSErOb1gaigzKyc9LTEpKVfpaKAqK+Qb
GPKrsgLTuc60NlDReW/5uj0JVJjfqc7U4NSCiTkhqwCZyq308vIbQ+d1CnUIpoU6LPuiKZpc
HOocTEsPdQqisIzRkQcYISc5IRgo/4VQ+eDRIzU1BZ7Gl5zwCzHlJka6CfHCCXVDDdG+pCSu
y9o9KVSIQKgsK0eHA1SYWEkpXTrlhsx8jtkrMY3HckyZxESy5weT+FWl53v/F5c2DZUVBi7s
jN5X/5PxH/GBkNU2v7ColGVBcXkwLU3325icUEoaSEqB19b0iq5dkL4gH42Yzt2QlRPqEpwX
ahRM1QmgCPA7mJ6do7J42UKNBoZgGHm5Ql3S07hegfTy/DRdQS4rmJXzNF3iflLRPZD4+CXU
nXK5HqEmA/FS2qaX50wtCbXKT5yK8VkSyElMCqXkovtygznFufyWggmhDp/gcUnqiSoX2haT
WhJzy/3JcYEcM9HK5bcFRWAQfgVT+yIiAa9LBfmNpvYN5BiJJMnwFC8FsxrlIGAlDxzCURZn
HTgkMSk3Sf+cpUqJXp2c5FBcVFkJUETqpJ9zxqrp1FyhDoH04rSoCtYo1PEq6JV2+nqa3Bfe
g5Ejjl/nEImykvHlQmeiGKXit9g0EKLMQE6wOJgbxBhKyczhtnFfq/ebkR3MyMrLUW/bGyVj
aoR0fC8dClESoiVgDsQYHNQpUV6rCg9W4UhwSEz0UIkOlMcFM7LLufCgVyAF8AWh0b62QwvW
9mrQHZ/mIMxuwUEFwUBCYFB5wR63rLC8IiWlfF56fmlvLiM4dGp5MDunb6Kq6+icqxOX8aMa
UIaRMSb1ws6Ye1IrgsbqrIoUY3V2Xs7TCbByV4/JqTQNc2B+am5FG8TlPB0gSlFak7Ws5ECA
A1zSaATiVPrEp2FBl6lYWylUuGiPQUoXJzqDivaYWpcgOhM6W+tSlI5/8JKalqKLMd2mB6by
67kqt7Q8P5c/LmqCV4n/RsgI9qOQGexXYZi+OqH4YHFqqHYwlfX9Wd9f632s92NgGE0MdA7P
SeX5QcxTGFA5lGjooWhxkYE9rjsmJ+kviUdzkzDUJgJ5OaFanTD3O8nDkG4wIx/qwaGyogKu
B43N4bz+5KFFuRi2UiCSDA3VQgm1vBKQYpDKw8MRmYrwbvACVf4yBEJluaHcTvzQnOm5ajgn
hGhIsDdeuy7TacsP6pJb3iDYTX2b+BTik29kUQt1o+wcrUlEEA/L1Z3kr4OaFwURVZQfQG/b
VJSNoa7n0vhErSnGlGi3LVaIT/QiiZtlJdeuGx+qdREKxH/mtS/iT9JJ9ufm6sqr0I1eAjw7
IVQbNWob1ZVeBvQOooZyXfD/RlSVk77IxWTtodHBpZhZuNKqJD+iQ3WThxZg8tf5a0MT7CWZ
43iOqO2VsU9r/dzyOuh3K3nMHvfB4JVJUT8Xdg7y4sADkxKfxsCm3PJYRWhCpws7x8Vq6yp1
eXlc3dNn0P0VVzciWRlIx6qhfUztV8ZvO3H8+LZaR7TXWf1Tv41drzpkvAXvezsFzxW+RPcN
hp1HO+00KjgtjiDuCN1uu5TIsA7TTiDdk4M8FAFTgOs8/U5rF+106tCEWNhVKA9wUihg2rTT
tN1hkO0hLwMuBjKBUcBy6FsC7ewNSLee/OZ692G7PfID1iSF66xCj8+jFvZk2ul7D2V3PA38
wHAq+l2M0vD9QEV2azwLcArBc8A1slmifYM9NAaaRsJfUf1oOK1px7nCLqfW/pZ0eSzsdtQV
ZbU8BS9QHw/NlfwnJZwrnInuZwzbpu3WAZp9OtjFtB2YYS+hbgyrDGnLUBctAx46Ax2AVE+/
3cpEvhU06xQshX4prbO3UIpxhLYbR9wcyGaQQ4B2wFhgNDAf+vOApnYibTf7EZn93HXWaygb
MD9RuNH8yuPHULdDtN3nQ/m3RLAZWKp4CbCDSn4Xf9JAOSXWy3gWYFeAHwXXSFdyFA3VcH8B
fo2Ec6mFleuGtcR4XE9bgbs9eTuwyOOnwDpJSb5+dGksrDeop7US7ywW0ynNQ5ySh2hiDFqe
Rqfg66Jhd6fN+H7yPIwExkvYP5fyfP8ADA2kzbfXATOA7lRgnaBJ5wJzPiX77qTkuEOUbD8C
fpfH+8ZgVAw8vW9xDNbEwNPXSF8LzxgYVfbK6jj7qIbTkJL97SnZ2kc9YqHaeio2293dXfZA
9zfjXbrBeNedA1kfMg8IAAuAHGAa9OcBm629dIPdklYb37qHPBRZ90HvgdMAHc0WSmYYJ6iF
eZI2+6bys2pgpJL3uluU7IX3UROjTtH11fC9od6dlJNvvk6bNdzfIOdYSZSlgXGb5J6UsPOo
BsrabPyI9I9SkrkPYPkstbW/oiR70bkBfZ3kz8D4/uDcgHpuBG7y5CpgBLDG4xujYW2h1s4e
6hELawnmpK3U+hR0oFwPfiV70QKrgKZaSzFWd1Ka+SXNMkcqOcTcQ4ONF6mNeTve0Tc0yyii
AmO2+z7Cs4zJmM/GIe1XCukqH/IYv0J2pVTjcwpyHvMGamX9QJ3Na7DGraJW5qWUao7BfLYI
2Mir9sk4oqrD5rhTdagfWVMApavaCkyL0W0BphsuwncC9wIPKX0xkG+1QXm/QDcImKb024Br
rHYIDwVmRMq42qqDcH3gPKXbCTxs3oL8dwDblO4b4DMTNob5EvAk0r4IfAqbQ1kfVaOBi403
YYe8C7ypgbaMYKBt10MuM69VcrHxL7revFjsFXcN2yBWNtbX66m3tiHCr/Kapu2F8D28Nmt7
IQw3wR2t7IBN1EbWe/Rxtl7D3SYqD9Zt6xHYJnodxnoZnsPS1xDPxHrqI7rZyaTJTmb4N1kT
eS00T6g1JhhZyzC3euvWdvsJKtHrFtp2xB2j1qNP6TxZd6wbaXJkLVmq1w9rAmWo9SBq7nbQ
UzyvOzl0I68vCuWwtRgp+E67YTxuwNrXFen+iDEKmPsxBwxHHGMA5qOl5DO70Uazm3sEWAbU
V/PKE2hfCeTtGOsmjbAsfDsyJ8yi9nYDWoz8uXj/E61mZNlj6WYPVwNNnJ401ulDY9HuBs7D
tNHZQFMZ5hr1LuPRT/yue5oO3R5BG4x7l+Yw1PscQbvU+5znYTHeUTuyomzHAl8pnvE6ZThs
X3nw7MFMtvUi9tbnZPmOA+9pu9FvVdtx9m/6PbOdKrYX2qmxB/PCRv2unRZI8wuwgBb6fkIZ
LcG/o/q+ppApQCFNsguo0B8HPh/2nYv8P8F249MjHhvf073KTmrkoR3edxnVi7KHOjtLsQaX
0Xh7DeLW0G3AJs/GGcv2C9q6nYF3a6jxstSzSR4GZnhjhe0usSO2YMxugc3dBe2I1+PFvgl5
piPdcZrtC8LeSUd4Cp3vrITuMPAFzbSOwX7pBu5ifZ9CrewiAF8g1nBD6bH+2wPRLzy2DmFe
3+fhEK9Bbg7svPN5nYhew1F+P9gEGXY2xl42bKpsrGl6DVzA65q1G+MNsBtTE59JDZ3pNMUe
jHWsvbdWXQx0VOvPqojNwetMM4rntc6bm5tab1NrOww95m6Mxc32JWoNTXXeoc1OGOFhFO+M
ge4lYC3G9nrU7RXwA9TLznZ/47UZ77upNQdt84Cx+keGeZcRb95FLzCsJ+kGYLLCRxjb+XQU
qLCm0jKsBVMwjjvymAae4fHtrKLboFvHepF4R6uBTiI9XSdzNy0E9oq0m8Hma4bvwZPW+WSY
H2NNeMwot6qMRxGujfCF5hVYQwCrCvYk4O9Hm6IB3W9WFb0Y+eZm0w3AMnMh2rSQ8szraRyw
yEzBvJoC/TAKAdPOlA5l3QMsAZYCi+0QzbQvhz1QRTOAy419tNbqQWsdrEkO1ib/vwCsG/6+
Wvp20WMM+J9lzv3U39lJI9BeQt7+9uM0FPqO4OMh2XbKAX8aGIZwNuRs9EUn8O7Wz1irt+L7
fR7+41ak2wo7LYmGxl2CuaIK8/vnGOPn0QX2RppiHsC8fIQKgSyMj9bWe5A96RqrEjZbT8wH
PTG269EQ4FFgATANCADFwEygCBitMBB9s56aWddhHrwC8+FOamuVoh5PoQ+GUheMjQzrWRqN
+mQC64FioBDoDUxTdd6K8bMV4xVpTqlf+3OuX9fT1Q/fxxDj37AhQpRh7qIB5oeUbD6AMfIx
TcC63M38FPqPYad8S1mQWeZBGm88S/lAzn+T19xCvYxf6GJzNPU1h2JcDqNG5iDkyaKuZi9q
bY5HWSNQ9rmmq3AzrIaU5kwBsJY653vyIiAbeI1GKkyjwc5TwL3AX6idczWlg6djbWd7bkjc
SBoC3UT/a3hfVVjXq2g4kA90AiZ7PBfAN4R3pePHAuN4PDvfUGfboR6+v9F0vPsC8yjsvyqK
Y3uD7QBeM33FmIvH0AS7CQ3DN3cncBvwmkI9esxfz+gtMn4k3enrBd+thNob5bAH/ketu/8l
jIMxezTNgMbABV64RRSULrLfchi+4mH3MPCNJw+zDmtqY2DbWfc8Np4BsjfxyulRYy8i4l+6
zwAVwB4N+JQRHtFNjFpfulon3A89fAAcYD3Wl7a8xlT7NO5h4NtqCd22UzBUSfEP3o5gnScH
sfTWG5Ml1t5s9H2v6r0R9zlgryf3e7r9NQGd2Idl7jHgQWAbcC9wE/S8d1EL2Bi1v5AEtI6S
JfaRM8DbE3AaR3CnJxex1Hak+yPLcxp3L1KJ0wZ2E8MHG+dWzKmMq1B/2Ezs07HNwX5rtE8e
7XfDj2hhfk03WT6s3Rl0k/kQsA7hNIQn0E3GA8ABcsxPoEfYno24RZg3F2HNeV/xPKy9480y
GoS5wYYdNd78nJrb6ZgrnkTZa4E9lAkb8yTDLnHdaFgvMrC+1IGsE5Em+xAMw3XdaKCMWgxz
B63wcAcDPsn1UTqNa1FnQPlLt9D1+A5PQt8IaKj8rQjwTPaz2H9S6zFwp/a9iFz4bOHheOYJ
jXB/jZMvMbznNkL5KyEbA7cyrDuN4Tq/breuN/taLMNPefVoxM/ifuA2yDNjYRvUyDaMwVya
uYPToi/e1NB9xnr13P0M60faL/Hir0G/zarguur8/onU1z+RZTSov++g6zLALQ8pxsfUVeFr
6sagf1Maw/RjTWDUouEMYwvSbFG6bgqe3vJgTPEwmpoq/JmaKLyAMQqg/7Oigb5/xHoO46Q5
+oDRhAyF5jEwyIwGP4P7Ae1WfYFvr77yXVKopfIJtsAfcynRuUbph2M+neUkwzd7HWN+l/uu
Uw9rRTnGbSb8lraw1eGT+mthbuyIOMyrvi7I/wXyyn4x/FG7v7cvzL4n7/mmevu48IW4XKz9
pXGP0M64xrTTx77OYJT5FNAI3y3me/hHvdWcfbr946h9/ch+e3u6QuZ5lB8Xt0mXzXF+9qHf
0f4zfPAf9Hrifop2zoGfzb7YcOTro3ytHPcFtGMOntOFn8X1Vfv4mFNQ5xHwv/vIehS7vvD6
gPI/sNPcr61JlGh9hTVgI021Z6Jv09Fv8OPx3HvM7eSHr1MEH6c55vFE1R4+m9DYHHUeUQN4
5vUeVgDd1TmEd/4g5w0e2rNEu3oC8+UsAdjmnSf0APKBEvY3BaecJcS0T84Jos4IlsScEQz+
T84H+Bwg+iyAfdjIGcAL1Diy7899+ZJ7F/ykRH6eehfz8dzP8C7SsKbtgj30JHQzqJ23/2db
j3t7uV15b9b93jdQ7w3y3oE5gNpZT2AOGQ5/qx/lKj38NMzpat8P9lKi2jPjsVoCO7iUMv3c
X3thO7VE2kM0Dj7heLU2d6dlwOpoYF0vRJochtp/Hu5+pvZc76Pess6j7IvgU+arcvVeLMp1
X9A2A9Ir2yD8Jp5TDDvgKOcxX3evMF+nBLs75oDudKMam91he/8F7WRbejjq7NkcsfulbAOY
a+gO+zu9x+m7lfJ9G/DsQqzr7KNyezFWkbevmeL+i6H2UV301WewIxYoX2cBpzV+hn/XAfPH
7Rhj8DeVr12997qK/d7T7S3H7Jn3l31zab+HaUBDtmvQ9lYe8qL2k2di/V7j7UEzctm3FkTX
Q0H3QfW+sRfv7Q+XA/HoV7d6f1jBUuPhUW8f+FH3bYa3NzsAWO7t1a6ytpARvTer9mNlT7YD
4vQeLHFalPGKSsNx6DPjR8pWY/EQdUDcbXYR2vchkIY8L1FP9GMf83vqazXDOO1DYzHm43iP
BmhkHaAhyr/kM6u/KX027LEF9v1UYpVTqZUJ+3EFzYLf2dDsBpvliBvmfTxfN7rFvgVxsMuc
DTQH31Scd9aTrfbwViLMZzoV2j6Dn6jPYG6GfXsrzbTuoLH+N2l73Fh8h3m0HT7MTt9btN1f
iu8R9iKeM1jZfOvptlPOfqLO5OSsDHUaLbYjnkFSNsf5xsJ2K6Rtas/xn+7L2h6FzV1GI4wj
4YN41jzku0DlPerej3ZMxXNIPQv1VWdwt6o9p/HWOrTBs2djz8OUnclxB6gN5oB2Vq77nXUZ
fF0+k12P8EnMCWWwE/qh7LXqnKwd8tTBM8ZyOnwPO/GOd6rvIZ+Oyh6rhzlRZ4yM6zy5CXXp
CLQFBgAEDIucKcpe7FK6EwgwR3s78j6bnA8C13hnhAS0B9rwnpsg6oxQI7bd3tlf1LlfP+CW
6nM/Bao+81NoCjTz3umVnlwkZ3vR53vqTE/O9aaT453jqbagjHiVxut71e+T4V+8DIm62LuR
5ge9L63Geibmj83Qi90+2EP0uVqsPb/CQ/SZmpyjncN5zrmc4eDbva363Ezt+fWx7qqe/9Ra
ADiJ8NX1mWOG3QPog7lvgJ5jFbIQt4VaWQdhQ1yi/Do9T2F+wBz3M++B8zma+bX7oPkb6xC/
CnNeEW1UUHOf+5LKl633Ix2sgWpfuyeNxTwXjIKe/26ijUAQ3/QNCjy3f+seMlPdfytZ7u7D
/DeA50DMK+3sxVgDxtLNMt+peSwLdeY57m/As5g/nqFxah3ZSJOVRJsdP03hPVi0OQ+2UB7v
mXLZmMvb8dym+snL45uLdekdyvc3Q5/8jP7dR0nOMvR1HbyzR5F2Ovr4B+oMzEN7D9kj3EPW
u5hT6rufY60ttBugzAM0A3bBZjsXtkR/pJ9LY9nHNtmfuQX+0THqqvZuuZ8Wot8PwLbh/emH
MCe2p0a+N9CG0qi1+iGU8RbWV0Z/2CAz8E0WU4bzKmX4psKv+YgCvnroj1GUanWBPcJrCN6j
+RPyIc7OhEQZThdaiTXUYB8Tdjixn2meQH3Fz3yIMs/Bz9S+ZiUNYX9T+Zqen6l8TD7b26nP
6OxO3jmfd8ansAR+KeN26sjnfHzGV+N8byT1VNI764uc730Im36cPuczh1Fd83nwQYhbSe2t
YoyvKfBf+NyQzwW988BIGpSDNJmcxrcRY/sZ90H7ObzzePdB393ul/YTsAOfx7c/GmgObMH6
Vh+yg/sS3n8fi+dQ2Ai+1ViL8T2Y0zEWS4EPgX2ezZcFWwW2BOzUfBs2mnGMZvquVXpZ72dY
y7GmH8d4wfjFHNPB6gvb7yrYLu9H2SfeN8rfLI8ZtQZfgm/yfdpoLaYMtGWmOjedA1QCSyiV
z04Bf+T8dAN8zB3qHHW24l8CGxFejvW+DdbccbrPrUSMxxaQaB/3t9UTfc5nqrPd940vVL8T
3llnxM1RuME7V90IPAAsgK3G7+kb3ecqH/ofSDYtYC3K5jPZVdTK2EdjrO40psb+Pnx15a9v
pmJgluwp2hmUxjCz6Cd1XsvnuOC8H6A46y7Dd3SZ3mc47V7DDvQV++AF6JvJ+qxYnQ3zcxLo
tljY42sCuoGQZ0KXWCA9y+RYQN8c8hRAnwp5OsTW40zpUs9Sj9Pp20Kegv+2HmcpNwh5Cs5S
vwzI0+Fc63Gmfm4DeQrOUo+RkKdDjXpgbBUylG3N+0J8JrUDc7yG2vfhPS4er5E9NaRTZ13e
HpnATnF/ZVgm3aH2vBht1B4R+RvQOww1r/L8yd8bj2O+M/GB62rg+wb47DgaRFUljJp7a7ps
hTPp/xkD0bfTe1tq7+8DLxyVP3Y/NLYc2BC7GcqX1/ceB4qEz13PHhfez1LtKXCaSdTSgU1r
30v1VTr2/fnMHusPkMpn8/Z7lOW7Hr40n7c3gN+k588+ItUZ+1LM+byObka6l/l+D9Xnc3m2
MezFAJ8fYf317uMNicg1GD9rwnOVzFR31CbAF23pEPgk2M4fIh3fXdvuvmxvD5cDheCtgVfA
10aFy4CcmmcOZ8/jK6agr9h92VccLgcKwaFzXwFfK2HrcPiY/Vx4BbBM8RfDqzx+P7DJrgof
c/4aXgEsc3LDO04Tvh/Y5N39OGta3174WXvDx/ybwiuAZf4LWFczbNrhY+YH4RXAMrPgtOH7
gU2m7Y4EljnDXZ/zS3iFr054ueI/ha/1OeGFzvDwW8BOu3X4mPVVeKNzPurRMHyNvTW8A+HB
Gvo8xMlU+Zb76oaXOpvDOyLh88JX6TDKygzv1HdQzp7W34gm+xu5Pv/u8HL/X8NL/ZNY54UP
ha/icOT+yO8j7z9IWyOf3EUBRnlytAel9+6nbAD+AGyMCm+ICjNyo/g5pcf3aZjd3FXASqAQ
YfLCjHwgwewWfsvjPwDLgQ7AdKD0NHfmakJ/p4u9uzArPFx/mnADIAEoi7o7MwCYz3do5L7M
/wf+k/u9/9Fd4Kd/H95511APsXx5lF/+e5h7Lul8fX8f+ozNLfRQfGrYTTCOhL+BnOrd2Vrn
7RVke3skZ70PHNkHYF+c59r/M+n+Yq0BYvSRu2D/R/At+n2cy5x/LvPwucxj57J2xM7n4CNi
w6fMh43CBTXmQ4TF/hCbQ52RRdsT0TzKnojYD3W0XQD/4EqBM1LdF4tXdwtL4O8OQF0r9T02
+4/e3v8MSnTqUH111lpBO/29IDtpu6L6LiL8psXwtd+G/XAnLeR7acAu51dqz+B7cHw/zp6C
vPXIipxfIJ3fr8+B5JzHOky5fCbF8O7UNa5xry76nKKQhkfuxzEW0Hy+c8n34FR7btDnDGhj
D98kutR3AV1uN6fL/fXJ4rMipzFNcJLQhtcpz6mFek2B//6x9jN578XaCl9+r74rhv5Ud8Ks
7xA/GH02H/P4+4j/EXIu1gu2g5pRvPI5GZXUATZQvPUtbOa9Cpvt/dSMoe6fvYVwEjXhPRJ7
jHcvbDdN4b6yDtFFcqYA/3RcZG9J31uL4/0XO5s2AbdH7qMB1lqya9wN3ksd+C4c3zFT7anQ
e9bsA/vGUr5zF9r1J8rwtaImvkzUI50y7etQZ97X74S6PaTu4bVTc0YjyCO03Tno3Qtsoe//
Ae1Qj/PtOxBnYB5bgvnuXipWtl3UPVG7IfV00qkF+n823/cDtjujKMDge4XqvqGLvHlkqDlz
u3cvsAvvCVfvJ/PfZXD5DO+OoqX2gNfQNgW5g8h25hfqzmE1jiN9IzxrpW6Pfb63b3mYhjmr
gVxaYL1PCzCODV8z1GE1/Pc0tKGMSu2JqBcs/TjS94NZmo8B/HdKY6HLhHwW2ExRf9Tk/h1I
tusR/11TG/V9Vrm/sU9u5dBq8dXt+4HFRjziTphXwCf/nkbJ3yvBRm/Hd8x438/pSAF/Psb3
EHXnM+D8os76Evk7jHuIutm93bC9gpLsSppgb6IA8ga4DL5/BnB/feVsoa/4fpHfoGchC+3R
xnv2aHreJvhGZDynIdz9lc9/0fYJ/D2jrPn2QertFNJC6zVKQJ022l1oit0U32geZdu18a0N
oLlWW7wvvh/rAb7ZXg/7FXa46xj2J5Tr/yfF+z+jRv478E3OQl0xBzm1qY3vQcj9NNbfH9/D
65TE95vtPdQibqL69vtwWga3z5lBrZ3u6n5lovMYZBkl+mrjmxpJTfjOr/W2u8+fjjF9N+X5
UjG/ID2Pcd8emu38Ge85mxrgO9+O5w5Cm3j9b63uMl9Erf0/UolTn0p9IYxFpLfuBl5VfumH
eC/r9TsOZ/HfqrHPabyK98/7bRVuRvw2esI+RBvMQ7SSAV4JOY/1vwf4k0P0GDp5voymyN2I
NlGICvN+TWQdeE7dd1jnZBpf8h11Sctp8IMVgT4FjvKf79Uo7yyI/YnUZ5AuU/ne9b37+YO8
uCEe7tVQdZyi0t8D8C3+1h6vgTP4IvUUom29PdWItsmi7Kq5sE/2ayDNGewJ9DO+3pPNgSXA
KKITYeA43gOdWZ4NJw9CdtU44Z6KKvm7hF2eBE4meugeg3wPV3jAaDs5JQbXalRth5yr795U
/QD85P2dBONR73klXriLBw5P8er8I+RsyJ8h53uo8P4G40cPXXQbuK/03ocXHw2MgJNXQn6k
cTJDo+ohDVXuAxpVn0MO9+ClO3kN9B9X56/6g/c3GdHYANzuYZyHW5B3hYd5Ho57kL660sMf
PMzxsEyj6oTGyd0eHvJQ6sHrl0h/CMYAbT108NAuBj1qIrp81Q+DPAz2YNaE6tsS7+9norHd
w5n0l8ZAxsRWPSZOXqKfF5tfjVUzaszGlHPyOY0qfN1V92mc/GtNVM1g8B4D/IQDGtScz/dP
uT/gneudyxz5/wn7aroP83uQxlBiZS0rsMe8/olaTY1hICuFrBBynZAyIdcKuUbI1UKuErJc
yDIhVwpZKmSJkMVCFglZKOQKIfOFzBMyV8gcIbOFzBIyU8gMIdOFlAqZJqRESLGQqUKKhBQK
KRCSL2SKkMlCJgmZKGSCkDwhuUJyhIwXMk7IWCFjhGQLGS0kS0imkFFCRgoZIWS4kAwhw4QM
FTJEyGAhg4SkC0kTMlBIqpABQlKE9BfST8jlQvoK6SOkt5DLhPQScqmQnkJ6COku5BIh3YRc
LKSrkC5CLhJyoZDOQjoJ6Sikg5D2QtoJaSskWUgbIUEhrYUkCQkIaSWkpZALhLQQkiikuZBm
QpoKOV9IEyGNhTQS0lBIAyHnCUkQUl9IPSF1hdQRUltIvJBaQuKE+IX4hDhCbCGWEFOIIYQ8
YrhCwkJOCqkSckLIcSG/Cfm3kH8J+VXIL0L+KeRnIT8J+VHIMSE/CPleyFEhR4R8J+RbId8I
OSzkayFfCflSyBdCPhfymZBPhXwi5GMhHwn5h5C/C/lQyP8I+UDI+0LeE/KukENC3hHyNyFv
C/mrkINC3hLyppC/CHlDyAEhrwt5Tch+Ia8KeUXIy0L2CfmzkJeEvChkr5AXhDwv5Dkhzwp5
RsifhDwtZI+Qp4TsFvKkkCeEPC6kUkiFkJCQx4Q8KmSXkJ1CHhGyQ8jDQh4S8qCQB4T8Ucj9
Qu4Tcq+Q7UK2Cdkq5B4hW4TcLeQuIXcK2SzkDiG3C7lNyCYhG4XcKmSDkFuE3CzkD0JuErJe
yDoha4WUC1kjZLWQG4WsEnKDEDF7DDF7DDF7DDF7DDF7DDF7DDF7DDF7DDF7DDF7DDF7DDF7
DDF7DDF7DDF7DDF7DDF7DDF7jAVCxP4xxP4xxP4xxP4xxP4xxP4xxP4xxP4xxP4xxP4xxP4x
xP4xxP4xxP4xxP4xxP4xxP4xxP4xxP4xxP4xxP4xxP4xxP4xxP4xxP4xxP4xxP4xxP4xxP4x
xP4xxP4xxP4xxOwxxOwxxOwxxNoxxNoxxNoxxNoxxNoxxNoxxNoxxNoxxNoxBj7OBFZzZct+
rWAzV7ZsDLFCh66rbNkbokyHrtXimsqWdSCu1qGrtFiuxTItrqy8YADE0soLBkIs0WKxFot0
3EIdukKLBVo5v/KCVIh5WszVYo5OMluLWVrMrGyRDjFDi+lalGoxTYuSyhZpEMU6NFWLIi0K
tSjQIl+LKVpM1vkm6dBELSZokadFrhY5WozXYpwWY7UYo0W2FqO1yNIiU4tRWozUYoQWw7XI
0GJYZeJQiKFaDKlMHAYxWItBlYkZEOmVicMh0rQYqEWqjhug86Vo0V/n66fF5Vr01Sn7aNFb
Z79Mi15aXKpFTy166MK6a3GJLqWbFhdr0VUX1kWLi3S+C7XorEUnLTpq0UGL9lq000W31SJZ
l9lGi6AWrXXRSVoEdL5WWrTU4gItWmiRqEXzyuYjIZpp0bSy+SiI87VoopWNtWiklQ21aKDF
eTouQYv6WllPi7pa1NFxtbWI16KWjovTwq+Fr7JZJoRT2SwLwtbC0kpThwwtSAnD1SKskhgn
dahKixNaHNdxv+nQv7X4lxa/avFLZdMxEP+sbJoN8bMO/aTFj1oc03E/6ND3WhzV4oiO+06L
b7XyGy0Oa/G1Fl/pJF/q0Bc69LkOfabFp1p8ouM+1uIjrfyHFn/X4n/Z9/LwOIpr367u2dfu
2fee0WhmJI2kkUa7JWtatixZu7WMvMr7gk3wLrwvgDEhYAzBIZglgQQcQASskY2FzWISEyAJ
4BBDAgnE3JDEITExJDcB2xq9U109smyT+3jf/efd77uyf/2rrl7U5/Q5p86pav2G0HvklHfJ
3q8J/Splnw70TsreC/Q2oVOk85eE3iL0C0InySlvEnqDdL5O6OeEfkbop+SU1wi9SjpfIfQT
Qi8TOkHox+TMH5G9lwgdJ/QiOfYCoedJ53OEjhE6SuhZQsPkzCNk7xlChwkdIjSUsiWAUinb
bKBBQgcJPU3oKUI/JPQkoQFCT6RsEK/R4+QujxH6ATl2gNCjhB4h9H1C3yP0MKGHCH2X3Ow7
5C4PEnqAHLuf0H2E9hO6l1zwbbJ3D6FvEdpHjt1N7vJNQneRY3cS2kvoDkJ7CN1OzryN7H2D
0K2Evk7oFkK7U9YFQDenrAuBdhG6KWVdCnQjoRtS1iTQzpQVgjHakbKWA20ntI1cvpVct4XQ
5pR1MdAmcvlGQhsIXU+on9B6QuvIrdeSy9cQWp2yLgJaRW62kpx5HaGvEbqW0ApCy8l11xBa
Rp5sKbl8CaHF5MxFhBYSWkBoPqF5hOYSofvIk80hNJsIPYvceib5RTMITSeP20t+UZLcpYdQ
N6EuQp0piwA0LWXBv6EjZcHm3Z6y3ATUlrIUALWSU1oINacskBegJrI3lVAj6WxIWbYDTUlZ
bgGqT1l2AE1OWXYCTUqZGoDqCAmEEoRqUyYY39FEsleT4mYCVROakOKwaVQRqkxxjUAVKW4G
UHmKmwVURo6VEipJcflAcXJmcYrDghWlOOybMUKF5PIC8hvyCUXJzfII5ZKb5RCKEAoTCqU4
rKVsQkFyzyxyzwC5mZ/chSfkI9d5CXkIuQm5CDlTbB+QI8XOBbKn2HlANkJWQhZCZkImcgFH
LmBJp5GQgZCekI6cqSVnakinmpCKkJKQgpwpJ2fKSCdDiCaECFHCqHEhj5E2LuJHjIv5i9C+
ADgP+AL6Poe+fwH+CfhPwD+g/++Az+DYp7B/DvA3wCeAs9D/V8Bf4NjHsP9nwBnAnwB/NCzj
/2C4hv8I8HvAfwA+hL7TwL8DfAB4H/Z/C/wbwHuAdwG/1l/L/0pfzL8D/Lb+a/wpfZj/JeAt
aP9CH+VPAt4EvAHHX4e+n+uv438G7Z9C+zVov6pfwb+iX87/RH8N/7J+GX8Crv0x3O9HgJcA
wuhx2L4IeAHwvG4N/5xuLX9Mt44/qlvPPwsYBhyB/mcAh+HYITg2BH0pwCDgIOBp7Sb+Ke1m
/ofarfyT2m38gHY7/wTgccBjgB8ADgAe1RbwjwB/H/A9uOZh4Ie01/LfhfZ3oP0g4AFo3w/3
ug/utR/udS/0fRtwD+BbgH2AuwHfhOvugvvdqWnn92o6+Ds0y/g9mkf52zU/4G9mQvwuppK/
CVXyNyZ3Jm8Y2JnckdyW3D6wLandhrTb3Ntatm3ZNrDtN9sEk0KzNbk5uWVgc3JTckNy48CG
5FF6N7WUvlmoSV4/0J+U9Vv61/cz/+hHA/2ovh8V9SOa6mf7/f2Mbn1ybXLdwNoktXba2p1r
D66VVR9ce3otTa1FmuHR40Nr3b4GYGHrWj3bsCa5Krl6YFVy5dLrkivgAZdXLkteM7AsubRy
cXLJwOLkosqFyQWV85PzKvuScwf6knMqZyVnD8xKzqyckZwO5/dW9iSTAz3J7srOZNdAZ7Kj
sj3ZDv1tlS3J1oGWZHPl1GTTwNRkY2VDcgoIT3lYj9/DsPgB2j3wJJQbTSpyC+7T7nNuGeU+
6D7uZkxGF++ic41ONLnDiVY5dzj3Ohmj400HLThy8xuM9jftv7P/zS4zC/bcwgbKxtr8NsaK
ZbO19TSInKgnXFwmytpmC4YbjFZktPJWegpvRRR3mjvHMdYX2TdZ2mhERuOokRaMcLrRwBto
vBk1MIKhuKLBqOf1NN6M6hmboIcefMeIblpPg1HLa+lkQtuhpQVtYnKDoC0oaqAY5EeIQiwQ
o8JPgax8A/j1kA3JEYzngz3d0WjLsIrqajmomjb7IPr6wVA33gqdsw4qvn6QSs6aPWMQoTtm
DiJ6cs9BS0vnLLJ/85491CRvy0Fv94yDD3lnthzcCQ0BN0ahQXkHbdSkmdG56/rXRaPr58Jm
7rr1UfE/7KF+vBfFnfj/uvWwj//1i/tU9L/8IacBzVsHP+szneuj/6N/0P/sx///4WeQAhOd
UTdK76IW0zcBbgTcANgJ2AHYDtgG2ArYAtgM2ATYCNgAuB7QD1gPWAdYA1gNWAVYCbgO8DXA
tYAVgOWAawDLAEsBSwCLAYsACwELAPMB8wBzAX2AOYDZgFmAmYAZgOmAXkAS0APoBnQBOgHT
AB2AdkAboBXQAmgGNAGmAhoBDYApgHrAZMAkQB1AACQAtYCJgBpANWACoApQCagAlAPKAKWA
EkAcUAwoAsQAhYACQD4gCsgD5AJyABFAGBACZAOCgCxAAOAH8AAfwAvwANwAF8AJcADsABvA
CrAAzAATgAOwACPAANADdAAtQANQA1QAJUABkANkdaOwZQA0AAEoajGCPpQGjAAuAi4AzgO+
AHwO+Bfgn4D/BPwD8HfAZ4BPAecAfwN8AjhL4e+KF6O/AD4G/BlwBvAnwB8BfwB8BPg94D8A
HwJOA34H+ADwPuC3gN8A3gO8C/g14FeAdwBvA04Bfgl4C/ALwEnAm4A3AK8Dfg74GeCngNcA
rwJeAfwE8DLgBODHgB8BXgIcB7wIeAHwPOA5wDHAUcCzgGHAEcAzgMOAQ4AhQAowCDgIeBrw
FOCHgCcBA4AnAI8DHgP8AHAA8CjgEcD3Ad8DPAx4CPBdwHcADwIeANwPuA+wH3Av4NuAewDf
AuwD3A34JuAuwJ2AvYA7AHsAtwNuA3wDcCvg64BbALsBN1OL63Yi8H8E/o/A/xH4PwL/R+D/
CPwfgf8j8H8E/o/A/xH4PwL/R+D/CPwfgf8j8H8E/o/WAiAGIIgBCGIAghiAIAYgiAEIYgCC
GIAgBiCIAQhiAIIYgCAGIIgBCGIAghiAIAYgiAEIYgCCGIAgBiCIAQhiAIIYgCAGIIgBCGIA
ghiAIAYgiAEIYgCCGIDA/xH4PwL/R+D7CHwfge8j8H0Evo/A9xH4PgLfR+D7CHz/f0eC/9bP
zP9VwX/rxzFvLiWnqPQ65i38LTulpKqoNqqdmv0cpQeTtlET0OHD1vp6VYHyBTBXmvKDwaso
hCYLRhmtP+JyJYJHyhR7GK4JivdDCeUeCOWJkQ9G3oiNfHDWVBU7i2Lvf/jBh+ynb3BVsZIP
T31YXIS4ACfCYqCVSosimFVIl0XC5SUl8Vq6rDQczDLQYl9peUUtUxL30Ywl01NL433EvHVx
FtMxoqC3BxO9JXKfy2jRK+S0x2EqqAmx3bNDNYVeJaNUMHKVMqdiUlbL16ZkvafkvFab16RS
mbw2q5dTjvxGbjj/mdxwYbLsaxf2MYrqOYls5l6NipYpFMM+hzOvOtDUazSzMq2Z5WwqpYnT
5dTPGdlt9eB7eKxWcq+RNlBLcPS8bLvcQmVRYerBZ6ns0TOHdCxqDQ5LjfDw6LlDWmhoMw2o
qc4JLtwKsXirF7c6cSvkoBA+nK9FbdnBcOgfOq3OkeUNavTIJtNROlZHPx18MfhmkAnqgjqT
t8uUlCepRCJhqqqKxfr6OHsVB02uhD0b50pA49E+8rohWw/ZbApR5REmwBiYYFY4XF6BiJ7t
yiATkPWrEBvi+ZBZLVs18scVjMYc9HhDRqRCKZneGfH581wG2Rb0O/SjiTa3QcYodWpUnX5N
rVfL5Aa3TZbSGlQMozJq94xsocCmnqQoGQLr8lFRqpJ6VXDxDha18awRb/Swcehg4wdZ8TqI
kOOyCnDcKsBxq1Wbj0/Oxyfn45Pz8cn5+OT8o/ivzEaPH4Y2FS4BTQ/BmcDnhowS60X+55BO
5DNDWsw0K+gf0h7X0lpX5B/Fxcpsceals3QYaQeVPVTibEK02yoU6/tQVFr8VJQ0oDsarSJt
UKrFIAsGssJlXGl5SQC0Z8X27GNQaSEdDHLYmM2XmjLEV3YsWtOUfsqem2tH4fX7FsVt0bq8
sjlTctIjrspZzakTk7vKne2hxms73zhfPWNyGK2buKyrNs/KR2Q3Rvj8ns1thT2NlSZNWddK
GsVayzzpvmB1x8j7E2bU8OlKT0UXhagFo+dkOrkPvHjhkIeqjkpaiUpaAf4r1grwJ1grUUkr
0RcgjzRQDhSjAlQY5afM3bJjKI8qo4pQ4aC6F1z61FkMFCPis++cKC4KWQyKcW6psEpuih3Y
avHRWG5sVjIdLVdZhHlbmrb/bG9b9z2/2FG5YlaDWyVnZCqtyhDvWNPRu2dxRdmiO2e3ress
NSo1CuYI6zAZLLkRd88jnz748MWn51j9eW6D2WWyeMzqSCwyZfdLW7c8v6MuHAsrOB94ILay
vWBlJoqnNgjeRACZseWYseWYLSCz2QQCmx0grfkYthzKRXTjknTjkizGJVmMS9KN6xjktmrQ
jS5l6HQPo/CgnFhJRhenMhbRhyPaZSahHGcAe3sfPXcg/Yn4+kOPnXmw83Dpqid2Pz249Ym1
VfR9j114tIu86OnfP7N/+eFdzRe52p0v4T+/AMmYrSBZPnX9oCsivdGI9NQR6akj0lNHpKeO
DNOcoFab/WY/PLxrGKkE/c4wOh5GJ8MoHFY48SSkvjMCNKgYs/q+NWtBrJgYRljJ+sX3TF9l
6cEAd0WT2SrT6FUjd2MJ6aUqvUouh01agVIqCA0yNbTbaaTSa2SNJrdJRaRVmdwWk5tTpVeo
WY/Z5GKV6WIV5xblHj3P9IDcEWrOoNIsyW2W5DZLcpsluc2S3GaQ+7DeS/m8ShBtyGx2KoZR
zlBWpxMHSGlEip3gqsakQ1cJkxltMuIyPSCYMg3aU8LDi21BZfG7HFkWFYjaIPaeMHtAiqlK
1m01uzn1yB+UeqVcDhvZU1hKL5Zo9ugnso1yP5Wgvid4PR6jA1uoA1uoA8c2h0aHWyCFA789
PfViBPkjQmR+hIkYJfmNkvxGyZONkicbJfmN+AvIWCkqdQwjzaGsrKpY7TGkgTFeg3JTVd2W
YZQ/GOvF7xu8mSPqkOLcqb6+E2OBTtLLZd5cXsFhK8DeLmqLwxHwkv/LZBtlKp1SVzn3plnX
PnF9Ysrmx5fUbClLn+I4mRrGiPu1NpPGNGHOwsXF9/z1+719j5+9s/nGJVNcGtlcs9esCheG
27/xwqqtx3fVe71oU1Y2qFGlYj2mtNkV9mY5dH1Pntt33/mDC1zBXFcWsQ/ZNBhzY9TwoUQx
CuokFekkFekkE9FJJqKTVKTDyvXYs7VY+1qsfS3WvhZrX4vjgxaPEXZKsMLAIpjxhuUgnxfg
OGXHE3NwAPMzcMye1wUDSL5gPK5DJ3VId/loDA51NoFg1DiF1SqZ3CXH6guNmdp4qyNR0wp9
maZsmsoScLj8FtXIELSc2PJUliyHM2BR0W2iLULLBdoHk9Op6NqRH2XasvcyrZHztCLTlvwL
zQD9WalpRxL2DvvTdoaSVEhJKqQkFVKSCilJhdRRiIma0eNHQBMatksUF8QcC4Shq4RBMzLP
rbYG7M7xT3vpCfFTKUc/QR/BU+VQM56F4f2rP44XHodDbV5DsEt9DMUpM4TswkG5NHaB00fH
jdz46RSZdFLMOy896Uee+lVdnorCLK1STjMwQqmcwUI+q8jPEhHMatTQtnNWsdrI6XSc02SD
XNJoMnKFnXXMd7A82Auk+PU5SFJCLRS4YuzWRdi6YrgV0Eia1kiiaSTRNJJoGkk0DTZWnTXS
FdCw7i72Up6XyAw/YEewJRoPhyPoSwxJSu+sFoUSIZuN+VxpyXIH823KdPaV1oR+qmDtAZfL
b1bqTelu9Aan9OBQrmA19C0jm8aC2iWreolOqHVKmRw69C77yOjIfS6zNGq1gPQuauqzlJUI
a5WEtUrCWiVhrZKwVvxVMqU2dlmHUVQallDs9cx7GzcOjbkIDs8tMLaoR07Yc8eEOImT0RaL
26yGUeapzKNeeFjNeSTLV0RhZKmhnhTY+bWra2l9UZE9FtMUOhyu4a+YFuAX48su1uk0OI5o
cBzR4DiiwXFEg9+0BpslZKiCE9todnmn1mHXxxzFhQo+p5NPZsJEwgTpegkImskzIWdnx1pc
1cRYSQnO4sd5VRDhzB1yeBS8bLQSk3hUgt+3qB9FVGXhnfaAWUWnSxit1Wux+ixaOt2IIGY4
HfCS893X+IuyHWq0QY52a1182Hmd0W3WXXLOZRf2KTVKRgZJGZRJ+8f6D+Rl61w57ovTmQO+
PKdWbfZapZi8Xc5RE6mbhyJGo0VSpshGifUin8PKtEjKtIjK9GkKC+NYmXGHEW/gxDirwy04
JY5PYSlfZZem0BiROfGIji1EVB9W3lW6i5VIJkM0Bb4RtNmsX6IvH2MvCY+zKtl2vdWlr3BF
gkFr+hp/nYemaZWZdzh4kyrf1eWN8F4OTfCWx4sdCBIaM++0+U2qRgvUhVpvPEKfrtpWPfWe
5ot/H/OWJ3KyNPZcfuTV0kXz+2IdAx30C1A1QU4EgQJy10WjZ2Vn5AEIWRFqq+CyYB1YsEFZ
cOJqwYmrxUHUVCKo/VQRtRPqKp+kXJ9kqT4pJfBJKYFPUq7vGCT3GsoJCYCxO4g9S957eQLb
d0VkHCu0xfx1XDYvO9N89wf7vvn2bfXN+z7Yt/fUnimHI7PvXb363nm54VnfXrvmvrk59D0P
XhycN/3APx/af/7peb2P/v3xlc/f1t5z+7Fla4/f1taz9zmcq0NkfAX8z0PlUhsHsxWSIApJ
EIXkcgrJ5RSSIApsAnbOi9Xjxerxsjo9avXiatCLP6+juBBkPUMKhQ7E1A5ZO3Xjkj5iIOzl
eV/wymRPNi5lZ14RNvxw491qc8CJo0qeC1nz2pZf15p7uHp6X/53729f1pDN3L3ggZU16cIx
v4BXrbQn5mya3rGi1DDyRU7jIvKG6+S3wBuOUNXUHYJXEzDlYClysBQ5+CXn4Jecg19yDkgi
aCi/p8iz08N44pJy4pJy4tJbjktvOS4pJ47/BsYU0OgLhlHuIXt3SFaBX7Uev+pTr2MlVF16
32N5XlVxkVzSQEQxvpiTqlk5usICQAqNTmGZuX5XbfE9izKWcNsv904159bmNa2cmmNRpZ+8
0ijW2nlOEUjMqvHl9x7410P3fYEt47MHO/ftWl1QMznLaA7Sp1c+d1t7956j16x98XYwk+cp
YicyLdhJOVVP3SX42EKuQgWiVmCtVYjvvgJrsQKrrQLkP5KLZw5yExzWFbQ4SWecZFCcZFCc
pDMOf6zoKWShOnpmtYAEwT4R7OZwoNMuhWaxJjo7prhxMwFVUmwRJ1IKmasMyWb3MdKEgN1s
s6HScCQczpSCWoUl2+cKWLSyDdaC2p7qdRkTg9LQXFznalnXHglOmlPlLy3Isaw3qNIj9dOc
iZK7HqtfNImH0AwphhoCY3Hp9ERw5N0x04NCQ87oK3tXTa5b1jHBYojWtBenf5/tZW5uXW5X
KtKtgeppEKMbR88yi8AWm6g/PUvVjZ45ZGRRa52kojpJdXVShK6TVFU3TOcL0bhgtqDWuAB5
VnY8O65zO/C1bjzsuVkWb+ASN34d7qN0MR77htximnZ8yCmxhfAzRpxS6wqPoQhVAcVJWNBy
/gpUIWh1qJXDK+Ua3KrgKjhbDVRyh+vc8txuG9i2FL3gFZzlcJ0ajfaxZ1ns4JdybBM5cEVY
k12W8JWOJYBXTlwomEWTNzzcV7dqerVdC8mcylAybU1zZd/k7HjX8pXXdJVUL7+rJzq9rcas
kNGMQqvUxur7JpRPK3XFu1esXNFdgq6dfceiuM2f5QjxNq9JmZUT9FVMK6lory4uqe1Z09G5
o7fA6OTNWs5hNnnMak/Q6y2aFCpvr4mXTOxeA+/ICBHyV2D5WdSSIw4B14Yc1tohnPx+5XCJ
0w9u9PhhbPkKEy6DvVJEjEOy/qmonJej7InoWBF8qRzJRAIxwfqVWLzvy+SK0JKKe2aXWNqL
te+F74wZ4kIV5zGbyfQozreegPFtE+SCUWq/4J1fgPzYa/3Yi/3YdPw4Y/Jjq8F/jSZw4ysv
sDTKJglskwS2SQLbJIFtksC2ozSLqxJcn+FPVgQ13EIT7mK73JfsRizHpDgYvWQifejqtNly
ZWkg2zRl53D/tQe315Py36zK7+5vaunvjIqqCUBl8MH1z+6cVLvpmQ1MMKOOi5/N2j2zIH/G
jdMZ+/hKJwui2zWglWxqpeDNxoEtJxu5MIddKMeOwnqU70T5DuQclpxUbOCw58j04IZgwl1O
h9MRDvFdDrmJ1GOmqgRnQsQRsIRUXx/q6+uL9kVDYvIowylRefm4lDFusymU9BGZwRnx2gIO
Tqdk0jNVyJST5QmY1DK0DqHljApCF5+tZ1Q+PM2LIO/XqmQpcSJYpddceFGWwP14IhjLOBEy
7dMgYw21bChcg2Cw+lyYjB07BCaowo2cGAqxYk8IZTlwIzcLOfy4UVCMCopQQTYqCKKKrryu
YJGWGV9eQ96XgDcHP3iCW/oXGsuMmUzrSjEvF1h+k4z15Pr4qMcgS39Kn2cMrlx/IN9jZNJP
KBAX9vPZZiWNgghZGLUl5PMELGoG5dLIyyjMQa8vyCJ52MDhbI4zML+4GMu0ZQN2F9aKQXvh
hGyC1ogLQ6P2wk9k1Rpoyw0uO9ZQEXj6P8VZjCLBmxtDuYUo7EBhO4rYUA6FcruCWs7bxY0r
/MBb+8SfS1P5CI3N5I+TdkxExHykl5tys/zZVq0sfTr9vlxnzfYFwka5Hi1IP61TshCgwjaN
AtmQRa4xZ3n5CCfTpQ/W2lxGOZTAapoZGYFklZEbXTa6m07Y3EYZo4Sg4EEfqfRK8X2PvIzl
8Ym5nYXKo2b+v9XvOnBcuzhLc1zQ4WmbUJdbYepSSLaMxsfzS4HqkrgwytpLyssrzGOW3ETq
Qasq/U2t3BgJ+EI2rXzIGXfR9mLnIUZrznJl57JyLfpXesxZ0fv0e/i1yZR6Tfr2svXVVWsq
0PUagxK/MBvIVw117T6IzLmUazCLG0bhIXenLjKMImRaOA7/x1WqOIZWoHHR1GYVswIELWaf
WLfKXH5GY9LTyZGUxoAtx6ChT7p5mYYzjDxFb+RMU81uk8ofDOltTt7KHFBxbhMuNXh/hHW6
fJaLc7NwrjQHRvUE81OqhBKog4LfOImfFJvEaNX2Uh1ouhTH2VIcYktZHDdKh9G/BAMViRgp
pKNwJKYmSCP+BKlGmyC9nAmZWDNhmFYJFs7+MlXKltLVx0sRVYpKSwvr8oaRWzCezEJZWTLv
x4XNE3+ra5NRscycsjjN2Ldmbl+m4DgRndtXJc0vxyGRmguVLTZkqMHKxiWhJWVS7in1yMQY
rCSDtA1PRzIJ1uN28Ybquzob13UW1K5/bPlWW3F71cQFTcU6FRRYSvek3qWlC77eE35kT/3i
SfzMaXWrJjp0OqgQdLMSDaGGpXWtq5tDDaXTytzeoFfFOo1OryvoNecnt/ecsBckchu6J9WD
dveDdt+WrwGrhsr2MAwimkC5ZMTlklGXS/rC+6K+yofR54LbGsWZfdSPV12w/qN47Iuy4mIM
rRHUlFVTXhaQyYuGkfyZcLO7gW2tguagvE0crUCF9qqx6vaSzsbGq4j16oGLBLlM8abkbDax
nHm7ZNGdfdGmhoaIyuS2gg0plGa/wwm1a07L1Kk5C2+bnvOUtbRX8NcKUyL1WyfXzqhwoj/1
H9vVwIUn5K4EFwG30KnklSoyyaUa+UNuZZBtv+lg/5QbF0805U2Kp/d3T69ZtAX8ZBZozM+8
RpVRtw56xMyPBILTUgA4cwg7/pcsZ3xy+TLG6MdkeYPWCvqYARmcf+IFjX4qnz2M6EPmZuYv
xTgvUuunFucPI8Wgug3P90XPipuxqe0TYwsZVyxYKUjapxi/XMX4abnSWdMyI7bgniVldWv2
z4x21pc51ArapDdGapITNuwICH01Vb2JqA5PjXyPc3J6Z8hrErYM9d/84uZq1pXlMJgdpggf
yAkceWr6TTOi2dGgyuzFfjof9PKA/DoqTFVRtwl8ohpp3VXYO6twFlSFs+gqbB1V2FiqjqEv
KIqKEa3FJGXFJGXFJI+NScqKYYPSmAMN2qqIW2bIw5+NO5rB1WVDhjZ5K078RHNKXLFyJdrT
2OTSeBeEMmbMqphweHwhWME8oOQ8FrwY3rh/9qLbp+fEF941r+MmQWnhsU2pD0zeVp8ACwKL
qgtMFBoizowBbWjrbbtpcOH6Y7sap0ymtZlZkpEpYDsLtwr1Ny4BW5pcjLXVB9raD1EtSpVS
Twl5sfJE+apyxoy9yezHy0DmQD6uOfKxtsgCsRjfwBa+OFwffSRK46XPw9jbSmWS8ckkGxP3
tSKTACfD+gsE8l/ZKbtTRh+XoZMyJJN5Yr8NNzs+nm9YbaAN6o89ooH1jV8vI075fpQYm7hK
LDqoIhgYZ1bWy42PtkbKRYUqmf0R50jK17C6U1jcFNMptQqGZpTa8t41wqofrJ1Qs+ahRSu+
Nb/gALNpw8Q5tVk0TUcCLRt7C60uq9LgNOnNRp3W6TDXbh7evP7ZG6bUr7t/hvnGfYWtSyrw
eBwaPU/vlm+EDGxxysZiBxQdzy1FLXcmWrmlcOaWjMmN/0CuKC80PHpSMOH1j5DmbHmjK3y2
aKq/lZ0qVsdxPIcUPVHyKfGxkhNXrBpZpVnn8dVxUFpBKsmsGtG7IYdUKK2+XHeo1G94DbIN
ucn4mgpCk8NvVu1gWRxqdgSnXtccnJStg9zSaLYb5Gqt2lHSOWGhknOZs/0X/4LTULyczFj9
2WYXp+ybe0tvrt6oM7vxNwhl6buZW5lXqVqqnZpHnRSspoJG7GWNKhC50c+aUWtjSQKyU6yC
hORfwKefwYcSyg5oCnqjCbV2uGXGIqZEqcTWw4r6Oi7ooVFQonS7lSUFMqxjoRQreQb+FTP8
LFw2Iy8kaIFDxiIlU9n8nq77jNU6v5L5c83UPP+kdyubZ7/r75CWYRNkYe4dEvqjJa9j5doh
kcepPAed7OtR+B/NbLDWQcc2GxkKwhEFxDObXZqByNhcBQyvpeXilng2pCCoNDw2nOLPFcKR
iIGR9phbzcYbgp543872ikVuk72u/C+TV3cVll57YM11+xfms4Fif3EsHuKzS+fc0JrbyCOW
49LpJX1FjTH7ktnFU2P27nmdf/bnOtS7rm9ZUutm1gf57Omx9o3d+V6bqdAXLKQ1dGDizOra
1cnikDCzNFBbWeJ0tuZPnB8O9U1q29xToFYF0p/OWeavbMqZuZSvmDoyd0KCVjkLcnOsdZO9
RbXYvvdDvvkQjMxxatOhRCnKu7QQLBn2uBViacUYhmW7jyz3iQt/4pqfGDa0+JiGrPT58pws
jChHCpqzG5ytYvgUJ4TGVpLIYFx1+XKXOJoov2QNhmSpVuYhlYmMuY7CpqLarfWwK07EZ4bi
xjubZm1pDTgz9kwb2+bWZ89IjtyW6Rk//rY0TVx66wIcKW8ePY865THKSgWo248kgh3BVUHG
JuVyl1XKZpFPX1FRkwr6GL2G8lDWf7c8I6nUCmp6RsPjL3Twn4odcrJNon7eORuVoqE0snz5
WqAZD7vYGMEKUe2VCjDnV0+IYoypgNmVWVVDRRPycqsAIPHo2+m70WKQOJsqonYPdcTxN1Ni
sgD8GX7uUCaw44+psAChYXp1KqqjpPPGlSFErrF6BGKfoHE6qXghlrEQZBzK4ZssMJIOykUv
BUm5kpJMPkukBVnll0002S6fPbhM7E6fsLjRX+CAsppRqpWKoD0Q8xkyQQ/rIC9aXZ1nXLyl
J6rS6DmTHn8bIbcUTG1iBq5WB/GDreAHpdS3BF2iHOUWo2LBhNogPTopClcsDX/FWHqdyOLw
V3yMjlBZUH4RHfz7VXNwDZetoIDCKiEuYsvSynOaPA1cxj3ESWZItiC7F8eE+OmMFYyZwVda
oNyqgtrMHXQYFeldV9oH6lGZnFDXZVnVemP6KFqp14pTolCOqtFnaf3VbnLxLajg9GoGBlW1
zsGmj6ZDnFWKHagWdGalBHEFfJW4Av7lJeolG0GfH9KwDaLEkgF8+Yr3VZbtvPrRpKeQn4Qc
Zxr1seA24dVh8SulsDgrEhGnRFZ3oYarv3QhM7Xjvoj5eCy++Xw2vBLki5PVSHFdUlySFMOc
Buz7yDQ8tzat9uoPh8htr/rA6Bj6HIIsixSplmZIvhWCvq65tqGgsqmg1Tnu/Y9fWKqS5su5
qsziO46W4p8M/Vch89/FUKtU6UvGIj9JQqlZZcmvL6xaNwV7jz1gVtryJxdWrR+LrAqTx27z
ssrWvU2VM+uL2ILOlsbs6dc38ZdibLDqihh7dQ+zCxIThlFrVRuSHa5YXU5xfZ4Zgm9rZgyC
Nxin9glG8gbxRhqOzn2175ZwsejTsmxmVBI/TBn3TQr6/Ig0MOFhSdAUNOc5s5syqsdZw6Vv
HNjLtB36yqr998PTmBK/3fZ/GZ4uUxQoaD4enXA1+AFoCK9wPiZ4Erkox4RyOTzHGdahsAqF
lShPnFX7klXN01+6qomTdV9MgzTjlkv9ly+XHqU1eA3i/7Dv3eFxXNe9907d2Toz2/tsX2CB
RV30skQhsQBBEOwNpEASJEGCBLtkkiapmljlk0NLfImtWHaUSE/5ZFGURAiU5Gcq5mfFsaE4
CU0peZKe/ZxEJWasZkmWiN1378wsCglJZD692H/skj/M7OyUO+eec+6pz5hA7240TU7cK2vq
DiHPUXWvsYeokqxsKgk6kP98UTaUfL1h3/f2jv7Vrpr6fY/tQ9vax90t2/sywx0Bd+v2vq7t
HRL8t11n7+hpO/r0XrTtRtsjmVs21ldvuKW3+5bB+ur1t+DYQvY+8ueINji2cBzHFgI1c1SD
KNpnuiwEGzFWJawgBxjkTIwSYZgzrpDh+z4zrjBXWGEOHvnssMKJ9fGOeenwDGaxWN0iW7Sw
t7904504rFAlhxXmxzoOtbesrnXBtw4+f+sCPlgdyrbkdSH1FuIZEkcbv1LcUmRdeNupA503
b24yF7VXZL+5dFXT5iOy/4yo9YBKrTvSbkQuvy6BBSah1edDLLKSS2DfuRhUKWwzoy74bbUu
OF8vnK8LRr6zNZLRNSf8FJ/EvrOruw77znwvXvPn9p1n0SwlKBHnPL/YU5/tO3NYzPwWtqi7
KxPDJKrc9Ccb4vM7FxTj0nKLR2Cv8p+zT+cpBSeK6kOmvA8tRBqLduZJl/2t4kQrARnkRMva
iXhEjgxuenp3CkZNKlNNlwyqzGVSuc6EmUuckYDBXAZciOciaS7RHTVZpYx1IVDVvbzgJ6Zs
4ZkOIPtZTMQQjxAMp9HYvWGrszzVELpSzUTmNdR7DYGwV0+RkNxo8wkcx2ksyYW1k09crWhu
remImUiNVssZ5crR/twl4iX0xhnwUlpf1tPa09dzrOdUDz0jyfmhmtyUmWIeDk+Zr0h+yklP
+Grar2Q65RwnZjE10YldZKxz3M/CD+UiHy02i/RpnRrCjqL7tepP6Ql98rVa7X8Ii4UbhN0C
qSQ0/zfOZnbb3lSEcSqVqSYyB3BqakYic9qWvt5EJvFS1fpbFpWv7Cy3aSmcqEy0rqgr7qh0
x9KLl/enY0VLDi8JdzUUWVkSWUdahgvWZMqK00XWeHrJ8qXpGDR2jqD5tjstYb8Z2Z9uyS2G
aiLR6rg/mGhZ0ZQazJToRSuvN9l4wcmzNqfNHCr3xFJxKVjctAzPRSD3G2In9T3QANY9XQSE
UKlK81J1LkrVuShVBbJU5cpSzIR6u6H0UqjLa7hk76rA1jerqO0JzHZVavRq4rwS2qPmDjDM
DkPY8uEYYqeGl4qS9vmb096jJhFnM7+aN9TewLFj0fRG7QJ72GPR0BxNrfUGeSPHRHr2LSKM
SoThYr6E56ISg8hqBzZwWo42OvB734fjfOTzyCY4kfYjS0AXwxwUwxwUwzm+mKykYrxscsHf
jSmS5lep4lepgrYfy7KJd56SWyRUYfWrPOrHvgpnLs3EdLQzgwwzejrYN7NMcIql5gz2XZH0
rKmdDvs9wIpeq90rML0n5aWftSg+ir2sq7zlcCdr8SPJFbkpi+DG5Yuatn5tIxHMS+fkB30b
2iOrlhMH8kfU7Cd5GNGnBPzqLAjl0GqGDV2/nBOM+KFP2fFBm/qeVnVrmTZ/5a04VcuReydd
iwtBkFUhwBgP4zQMxtGB5iAMB2EA77YGYDgAJfmoBMMSjJngwQAM4CAXJ1i7AhKS2gDOqXKI
FQM4woi/4ZkI4PvrcelmPBPQuTK6hdN5KbmzZkC2HBLKfzlDp9AdZyUTcq/TVNHejCXCbFcS
Vj6CPAwJkshOUAZX3OeLO41U9iWKxuVldm/IzFFZivyU0JoDbrtPYMkHKU6rZy8/ipOtlMao
JVfqRY5EPiGB/nCTLr2e+HdOryEJjQ5TO4V8jNsQtTvB62fBAqSemtGr1eHgV1EdrMXbSBJG
AzAqwagfRn0w6oUxD4xTsIiEDY2wsQE2lsKmEshLVtjLq+EDvE1rEbvyEroDb1IP462cwjPh
w6Z5Gfk8TMxWvo8f5Y/xFJ8WbV18VSaSafh6CSzBv5VgrcmbbV1bS24sITrRUftCDhP555iS
A+dbWycQJRV6T6e0laS28lEIzUzRmYyxM3LAc5B8xi59G0VnPyIN9rjPX+zUk98niFOkwVXk
88fQt+zvaAp5F3ZPUNSQ/0wQLxKciNjeL2qIlwl4keDMAZfDi6eFtZimJ4W4h+Mm901PkcnC
cjo0Q8hTnXRxHJohA1K8uIjWkf9GaLR4voqQdPSg+SoDd5wFFYgwAo7vY72RxBqjMQkdiB/H
cD7PAe2qbrDlD9kgh7m1GPut+JomAOtCsEYHdRJ2L/Cs6HQV5UUZnFvOCFMuhFIxUDZVLYCZ
V+HfRMRmybeNkXPkms3m6Vxzu8Yc8/tCVh31ysuUzhr0eCMC5KAj+5EGmmOSN2TRUhM/o7SC
3+2NiASX/V2J0aynkXfOwqHst9CGpPVmI3wGPmI0GyiS0bLZ07CPwVWoOospux5rD2QFHkH0
CYMlZ4EbvWsKS74bFrmhQ3aeHTBqrDESMQ668JLc4ILOOkw4J/RnnFpzRttD9YEe1WnFVQQJ
RWix8AZI5VVrzbieOlo9VT1glqM6NgtLVN3EVFS6JIFgjnA8mf2Bhg/7fEELR0NIfswIQckT
FpjsGV6g9RYjrKdELbnO6jDSpMZkmEwSF806Gq0TInqT1ciofZl8BiRA41nAozex4WqOqFzd
VoZ+r+Y6OIKLCMhpecrZZYrJzkuPmmlGtsLEAK7/virhPKNNI59wRmvey4zGqJm8aHVjfoT3
ZI/xZpyDJiidoGfxsewB+LDGwDHzzW6B9QSCRpvNyRPbAxERfWeMNkEyOuwufvIky8uWVnH2
dbgP/AK4gfZJnd0D+AsTSvabZRXJqzVPNW3uY4x24Wu0wew0C3YtpG7XOcIuZ9iuu9dfnSx1
vsRqNbIwQPNxt8QzDC9he78r+3/gPeT9yHMsA4HTYctzRB+Ioh8On9H6E+W0CZRNoIeiVe7C
L390dQGrMPdQ7uGccb8UR1LniEv+uJNjDHbhj2mD6BTlod2qt4edDjQ0UpJK3Dqdu0QKluJt
6WSvPNifarQshe1tKEwNlgDP5T5SxxoD7tPAMk4cfkbrCyEf3dQFWidaJ7DRUjn3KGf1t141
viu/Xz2ueEA5EAiUIuXvKsWz8z/QeHah2dEB+2lcNnZuDJeHcSQSdzSUxAt4qmbEJHeVtTQl
MXYuKEt2IsgzTB6A++ib0AxzaIYXoCuV8V/PBNNRf1VZqeMlVi+rOw6aj7kkkWFECT8BZt8g
tfT/AlagOc3ToKysotyu3luNC7L/kzJYvFZnQKQYYoAymH1WZKZR9LsGk4ZiDWYDc9hg4tCd
LQYAcx/CSxRBHAUmIDwJWN1Z6AEUwBXAaqIkoLwwFgiKMJsvt5pF0Uy+wJk4mqiJhkLRSIiT
O9Byv8t+gwI5BzAA0xnAat+icOz36vvYKMALl5sFURTIH/JC9mJI8oWCQQm92+3ZR+D79F0g
BIJpK4lVN4mdBlIWb9Lq190OWssQVyhlLQyyUkX7VFVPkpSlWaEB/M2GgQ1raWj0OkWXWU/W
LKnz+OuXVEGO99jsHp6gN/44u/riy9k1P9ELOppgNPSWf3jltT17Xv3nf9xKMQxSozym9iE0
ojfQiAKg6iwQFZtKVG1yvD2DRybKJZo62etTRpionKqkZPP6v0ZMVROxqLqs2kT4hqeuv4bU
m12iy2uA9Lr169dTBO+xWz2Chth6gHDuee2Vf9hCaxiCRgrn7+AjL1+Ej/yY47VodAw1ke1D
4/tB9hzhpm8EfmA84/xbk+tFPHdll/Ikz9uqgSmTXjbm3SZjDuhtok4n2vQQMMgWNRkfeghv
s5cDbqStLEwC6zSGtwuS55MmxiRXX63JnoNj6tP4v3WaXmTUp9FK44DqSkw7FXJkd0wn2vU5
I3I5dexDDynbnN4u6j6xuJGTFBDsJoY+75EEO8+wgtuMn3QXuQXW0wcQl3NP0vy0HMlyT+Yj
TDDImhyi6DSydq01YHcErBwk75jy+/9eDnRzOG5Mov83E310v6xt4sD/PHrKJmABWjg45jN9
20n/eQjgJCJSjRd/+cWl/RGiL9K+NpVamQ5H29ekqlelw0dFqcTlTEiiiHSKI+EXs2XUzooV
88KBpmVVVStbwsHGZbXusqDZHEy6vOVBsyWUPId19g7k+3yflkA16AJ/dhZ0I/vFbiJ6b+iG
iQOtcEsrbG+F1a0w3Apbx4n2tEXv8egPpeD2FOxJwYYUTKRgCv0wthtALETYrFSqx958Bt0G
lOshcrE/QR430atvyJWX09FxCJ40r+4Yh9bT9IapHm7EtgMXkAUz8EvZPhRx0ZG8h3vvEjOc
aepK55m9ItaVj/h9v3rk4T39R9Y1R3gx2Xfjw7siC9MlRpYiIKvjdNGa3qqBO5YXka55vSsq
hr++Ovq4vWZNW6S7s9UVaF3fml7f4oUPLX/wK5l498idf7l+6V9/+66tTZxJ1BlMZqPo4jVG
wbjw+KPrTD6HqX7oazc0bGgLG+x+8ebHh0vL+4fwrC9BtH1W7iSoBQvgLWdBDXYIBVxuhHaw
8KbG1SOp/JHq/JHq/BE5HCZMh8Uyckk2mqIMLM+fU553NWcekVNG5eOEM+20xGUtFpcdWXVf
UhoYHGmXzxTy+XAfj0X+47P4tHXyOXXY2bJ6kfshX6gexBfWPUu0A5C78BSe5OlJn6oZVyuI
zqn5mXNyIUMbtnS1+B5t5eimbflBt+UH3aYOug2zmqDF1qA21UyXTjpXd05OMUv9VPviBcVt
m1VIjjb8jEgp5h6QUD8zBatWUdnT/RMkWT1VX2SvqTGjb/kMew35bNOeh3ds/vauhnjPrs6m
delAxaY/27Lx3oESXF60YLQn9oq3bmlqZNRdv7JpaKQ42Lm1o3VDs//2247fChcuu3VNsnjJ
Tb3NW1b0BP2d/etqOm5cVVXWv6u1av2yjBTqXr6B2FDcUe7cuDzW3lTvrz46+RfJnnnNAX9L
W6ZkcPsObFshXnpR7jtKgLfTzitC8pF8SL4Ue2YRzB2lcEawHWeYLDieYcGTZ3HgvecIZHgA
SQnlSCpzSWrMVVKDGmj7JrZEkP8tjROlaU6LW5rSgMRh7jSHK5u0fVoCyF653FanMMQ5WeKB
FmhLS9zjUPukaSnu98m3M01XOyMrHgn6zEyIPGWfE9enZqhCinyxbOcTNx96ZEuifOSJ44fR
9gmjO9HUW758e7PNN2+oq255M7LFiDvv//D04MpHP/rOfR/J28cGv3lwea1z8d3Pj/zJT443
hNvX770dqa/Hkdg+SNtBEvxbOhz2wbAXhj0w5IZhFww71WrfIpn2IvbPyuWKEkzucggwaUGR
GhsrUglapEaJilSCFqkOYBFukDL6HPgihw7/1QmqHKGtLFeCKkczjp9TW2IQ6dEV3xGgYBbH
YetToSVF/DhklT7MytbJCTkyiT8TuNgn3z+gCMO0Fz6g+iL5kle05jKK910bUTN38ppNPsho
DezkOlavYxjOoIHGT3BdD8kgo7qY0osO0YFsxLc1Ro7uwLFHlneZRZfAka/cr6UMPrvg4PXM
D0iKghSrYz69lxNceJ3di6j9AOLpFnBf2lBUAxM+WOTFEY30eH4ZSkMb5mKbrHlskuw5E6Vj
VRH0D9SrtK5/ljgGdApxdDh+ocP5OKGuXpLqEfMlx6psTHIpXz8O43kKKXHcMkWZIAUygdlR
ZkCZRnKkYhZxcPDhiiJXZkp3sHLrxQM0sksnU0ariSW1Jv2nK4frRU9qcbVc4opcZYqgNY7G
1Tsa198zkLQtuGN0gqjSmHR0N+4rYXmfzeKz2w1Qu+7ETRsTid6GYDAe1Ig+q8nGG63hkCO1
7lBny+F7T+29yImyR7cV6YQTiH6rIH0WrEEk82CSrYEVGkSUCiz4FTLdKjDdKsaJVFq7aGl0
0SKHGfamceQsik6J4oBOGh2NpkmjW8PnY+XylW5JLi9TWNaNKH9GDlLINaFYvo0qaxpVbjfi
iTOjaTA24tKDxrTsGjdCmXVVFlZWgEahUbDVjENdWptZWvK+JNEZ3DKkm2oZKrtUz091DSHV
Xaboe1XXyyVWOF0t1k/r+elm8ZoZEXelqVQ1CdUjc02iFa0AJ1r2//WOeXtWNZg0DGk0cKml
ox1tmzuCiaVf6T2M5opldEZuT9twJuaq7k81DC6s1OIYCLLgzQ3LR9Nr/nhtqdSyprF9dHEp
3Lv63i21Vq/faET+UNgjRaRgy/LK2lXpIBIPq9lpYoPp1bXxTI0/FA/RJrfNZBeMZjTPyWUH
FjQP99frCDa1GOt+3HfwT3KdfhJ8mm7A4b9SGCuB4RgMR2HEA6NuGJIVVMQBI3YYtcGoFUYt
MMpDNMVhGoYpmHBDWVuJirYqtTnQjk3i1QojpbLoF8/gyiNPMsmP5y6nvegMHosfjzmCx0Fx
Hi8iPHaO+OcIAVk2lKKrKLQA5As101pcqUmVl8XcSXmCqUSA57WBJVqlPwBJXdWlyko1fpVQ
cwO4HXhC7ffMS+AVHzi7PHFKNOG0rrLBEAyQ/2QRT+S7piff1vMG5GNpWfiPtNlX4gtU+PgT
gjX7XSK7Fj4Cdwei2XfyAXHIM7zPYfY57QZS1OACRo2Bu/yjEPHWZAOWuCEkcSdpI9JYL6QN
sVoYq5ET4qSsscYUhVWraqVabNXocOMjbpmII9LHcRsplou4sa9ytPJYJVk5d4Pss0SV3I+h
rqVn5Coe8zhOj+MqObMDCU5JWl/S8IGEK/npkn7HLNEZuIRFpywB+YuqxJwfuKAIj0JcTN1p
aZmVoMImEHah1CZb2XMLqCVx5Mn5x0+PNI0sq0FOE4FdKW3xguGu9t39yVj/kRXNq6Ieh99L
NGtMWtoiZr2hTPnow6P18Dvb/mK0QXA6jHrBJQpuQeP0uqSOrd0tG1r9eleEMAUkDinBcDx7
P02kBu/M5fJ+CcGQfwcw5TchGTiFKO8HL58FAtJdWiEAFwo8r7aIzm4dfVNdJz+WeXG/nGbg
x/NX8bwSEJev4tWr5J91OJNxgMeCw6hJjEB+ZgNwhmH7imzQWtUVeUbVnXxPtP3FGXSNlRbG
YelTrn7dVCufvCTLs5BQsw755MN03kEO2M6MC5KnSJpjsknaZA+7glGBYODbk98wm2mtkSPe
M1p1DHVe9Lqdxk9f0ps4kjGYDVR3PGxG6wojehA1VU8EUfOnAHt9+PvDaOUoB23g+2lzURIW
07BIziAUR2FUCzuwqpDwa3eg5cSQX0m8hypgfUWmYriCTFTACtxoygGjUQK7AaG4AYo78DTm
2Ea8bqBLG7G9Ije+HWiENY3zG7c0kuFG2DhOJNLGsgiMpN+TJLbmg+KliIs1p9kVM5xC2R2U
mwIGVI+wciYPy1xMXZlmrZ3VHk3Ndp9ryIct5f2HH92d6J9XYkHE0ml08eYlVYN3rSohUvfd
MPKN1bHK7X+5t/+r69Ix4VSw7YbWeesaPc66NW09dxPPLnvswbu2Nep4UfS7bC4jbRJNPUcf
Xucvb9xy99IV3zo4v6h3553fnX/81Eh5Wd/mVOPGjkgppnhd7l1iiDgpRwCCadECfFreCZ2n
TMf8IRg6Rd+CXnoP+g/LXrjwwheHAIih4PwdXZltbf5Ax45M3460624+UBMJVQd4cygVjFf5
DXBB79HVlcmVX12cObKmumbtoUzdygavp25pXcfalNXXuBTAXE/uVXIXnQJWUHQWmJGbplbh
yv6aWYN1D+J3jRzqQ8wrpxumYkpTPWtB2mjxWGxuHakhb6ONVrfV6taTGg3HsaTGYNbTnEbH
kKzRogOIF7tyr9K70TNjlAXwxB/hLalDXMlScXhElvX5YIQco2ygDFieLA77xqH+ST0jgrKq
icmJqs9rgJ1OjcpSM8ZojZrsuEbwWC1eAe1xBi2DLFkNzGgErwWHutCeQUcTady3lb0P1/vh
Jkk4ohHdZhEdQ3sGjqaVnlrF6hoC68lxKoA0kf4p0cMzoGziQj7QCqfsZwixf1lTY7PjIslx
itEyl3+j4zmKYI064vbJYwaThqA4XkdatAaiRXBbdGR2P44Z2j1Bq56GzTDF6Gwhr8trIJjs
PjqGuWghspifoL6DfMB5oHqs1sKXgCg1Dr/1tIuPSq5xyD1F8domvBZUIjt38uJrlYhisKzq
3cqfn+dfO69G5maSLjon5Wa7BfjIEzZT9jkNGqYFUS37vMlGYzp2ItpaLEihw/ksoiPD6PTs
5fdZg5ZlOCNLmjR6LU38LBLM/imrkJaF24IR0c1r4HZWjwmrZ7MnNbx7cjO6C8Pg+yO/QfYP
5A9smw1i/fUDryDU+blBf3s2mJPXBnYbAJqxq8F9OA3t3dcO3QoF+mUq3pkbxm4ATMfnBr/7
+iBsVCD+KQDm/5wN64m5YbthNuwHrx2ONQA4j1wNF+Jqd8kcOF9AAQq8weuHD8mRf+TaIH1z
NgKvXhuC//cPG+Hnrw2R89OIjl0fYuenEf94GkVH50YiDUDJxs9G6dHrQ/IxBWWvA1D+s9mo
XHdtqFr234fq/deOFJrD2hNXo+5JAOqPXI2GhgIKKKCAAgr4DDwAQGMXwisANHlm4OiXgJc+
H82Oz8CaK/BrAFqQX9TyCQCtm/8/YOz6kV78h4t5jylo//j3i07kb8//KQBdegAyHwDQg3hi
4ZsI6LdFNQjzAegb//1h8aIvGX/zJeBfZ6P/li9AFoAlvy6ggAIKKKCAAgoooIACCiiggAIK
KKCAAgoooIACCiiggAIKKKCAAgoooIACCiiggAIKKKCAAq4VgABQblC2ABLvET7AEFq5Yxl8
eR+qHgDyJHmUPIb2m8nl6NsqcoT8NXmJ/E/yN+Q75Lvke+T75Afkb8mV5Ar5ik7lQiAAETiA
B0RBDJSAMtAAmkAL6ACdoAesBKvBGrAebAbbwD6wH3wFHALHyOPo7jcjHELvQEAT5KEL+mAc
LoZr4AAchiNwFB6AB+FX4dfgXfBu+HX4TXgGnoMvwB/BF+FPr+/NyLXqdv/1U4V8iJoP/pA/
FIH/HgFpQCOqR9AMFIEEmoUkmod6NBONaCbmgXZ5NhaALpAB3WhWFoJFoA8sBkvAUrAMLFdn
aS0YABvAINiEZmsIbAFb0ZwNg+1gBxgBu8Ao2A32ynN4ANwoz+MJcBI8AU5LZsmZy6FR4KfH
p55ePvX0Nvnp82c8vVd+er/69BVg1Yynb5zj6Tvlp+9Rn34Q3HTl0ykLOUquoESyiCwmm8nn
SS/pptjcD3N/n7uQezn3i9y/5v49907u3dx7uY9ylwELNEAHeGAGXhAAETJChkk3+C74HhgD
Z8HfgLfAe+ADkIMQklADjdCJ+NMLozANu+EiuIT4MfE68T55/68Gf9X2pQrhf+VDfuEZRvD4
1Hmbp65hER03T42+EvyLuk8CI9Sr+xTad6n7DNqPq/ssaIQ1WBtRHL4n3KPuQ+CBP1f3CXT+
u+o+iY7n1H0KeAi3us+g/Vp1H42HWAoeBRIaSzmoQH8lxCfDiBv3otnfh7AFzb6EeHkUHdkt
/x1ER4bR3i7EcRLitBH0T0JcPSxzz350Ff42hLZD6OyD6O9mdGY7um4EnbMRHRtGZwzL5w0i
7JfviflvJ9ruRbwnyc/Fv2xDR+ce0Vb5+wE0pvzZm9B2J/o+iEY2LD8/+ahUWV5RKfUOb9o7
um90y36pfXTv7tG9g/uHR3clpXkjI9KS4a3b9u+TlgztG9p7cGhzsmfR/K72TKJ9cGR4497h
z/umbqThfdKgtH/v4OahnYN7d0ijW6T924ZmPHLr3tEDu/HhTaM7dw/uGh7al/xvIXgPUjdY
/NuRAkhcQX589lZEvBGZ4J935n/1t9/LdMuLsykKJaRlfoh4m0DbMvQTEL4e5pEMQFmS6PEl
8LHIwQ2mpt8Cp0YWref+44i8vv3kX5669dNPJu/ifs2Ooa9c3gr4fwIMAOO+xtcNCmVuZHN0
cmVhbQ1lbmRvYmoNNzk0IDAgb2JqDTw8L0ZpbHRlci9GbGF0ZURlY29kZS9MZW5ndGggMjA+
PnN0cmVhbQ0KaN5qYKAG4GAYBUMBAAQYAAY9AIkNCmVuZHN0cmVhbQ1lbmRvYmoNNzk1IDAg
b2JqDTw8L0ZpbHRlci9GbGF0ZURlY29kZS9MZW5ndGggMTM1NjgvTGVuZ3RoMSA0MzQ1Nj4+
c3RyZWFtDQpo3rSbB3xUxfbHz52ZezckBEIHQ9m4SQBJBOklhJBCrwloFhASIDRpIgICCogK
BumKAlJUREHQpUgTlSYIKqJPmg+VJh0EadJ2/r+ZvRs2ISLv894/5MvMnCl37szcM2dKyCCi
EBpLnKq1Tata/XbI+rKQbAQZPYYNdXb8oW06kQGZtazX4N4D3jmTuIzI8TVRgWK9+z/Xq8nw
fo2IsrYRsaJ9sjJ7np1eL4VoyUTkr90HgtDrZfYRhR1COLLPgKEjWh+6Ek9UBMGGy/oP6pFJ
5ROrEfU+gPDqAZkjBpcrWKYF8vdBAufAzAFZJy9M7UX0/mtE/OfBQ7IGbxk9EvVpgzqUKkVc
tGQbyaQgc7ZZA7Us73P5HtrAKIhYYQfjQgQzcZiYTKBlEqWq96XWaU4nRRB5pUVeMrY55rNo
JxkLVBzfZBZST0eLkGM+0sykuz+DaRy9TR/Rp7SBNtMu+hddNoIpg16mL+kYnaE/6ZZBhsMo
YZQ1KtP/7Mc73hxAoXwTWVSKSN6Up71L5Gki1PSuZCZCpUT0XYksKs/nlXlnetd5d1shFKbz
hrFvIL1onJc3WSMVlrVVmE1Qfp3jomO+9xPvglzV6YY3HkiD0BpPU3fqjdAQGkEjaRQ9Ty/Q
GIym8WiRV2gCvYr/X6PJNIWm0nSaQTPpdXqDZtGb9BbNpjk0F605j+ZDPgvh+TqWdMxCepcW
04e0lJbRcvqY3kH4PVpE79MHkC6B/COEP9ApPrLTzIdkMWRL7FyfkIdW2HE+/0paRavRe5/k
Ca+ldbSe1tjuBvoMX8Dn9AV6dRP6eYv9vy8mUP73Ob6lrbSNvqLttIO+pp0YK99A9h3tpu/v
kecn86f9+1L20A/0I0bgT7SX9tEBOkg/07/pV/qNjmIsHqdzOoUv9hD9gpjDkB6lU3ly7s/J
60v1G9Idscs4QSeR/jSdpwsBeXzpDyHVKbpG1zHmg4yHjHJGIaMYXaW/EA41SiLmplEAvgij
ohFrPGpUNWoatYwGRmMj0UhFqBr1o6doGsbF6+h933iYg/EwHOPoVcjUaPH1+GJ8dUtyevkT
9Jvqtbloc/XvS93yW/Jpqe/wph8i1wrdx/f21RY7x9eI34VxF5hK9eTWXKWpFl+qa6DGzQak
2GTn3pnTG3tRyk+5WvMo/Y4Y1W4q/oCO+Ua38m+6lY8j/oTuBZXK17770b/7ckrYhvoeQd4f
0S8/6lSq1w4ClWYnUi1D/K92z52is+gt1WdnEDoJ/0atmX5HjVVfHrPjvkXMReirK+jZP+gS
fJfhV/82Q/InuADpH3jCZaDSnEW9LqJG59DHf6LXryPmBvzX6Db+XUGNbtIt+FTMz4i5psO3
SELFSmhFw2AGh1z5See5jfe/g9p4kdJrGHTH4IYwLOjPIIycYCPEKIjxo3Jqia8UjCqGVCou
SEt0evorJ31hI8woYhQ1ihnFoYdLotRCkBU1StsxBfwxRinICgWkL4HpQcnKGA+p2cRwGhG0
G5q8PF3D+C6LEe40HkYsM8qhn/caLozsSkZlo5pRw6iFHJFGFJ6mRnq80chwQRJlRBsV4VbB
+2HEG3GIaWwkGymIlUaMURvfQ7zRJD+dz2bjC9A/0N8HzEKGCf2/hbWhEQjvxxhcSO0onbpS
P/MU+zahSbeuT3bp3Mmd3rFDWmr7dm3btG7VskXzZk2bpCQnJTZOaBTfMK5B/Xp169SuVfXR
2JhK0VGRrocrlC5eJKxwaEhwgSCHZQrODIpJcTXJcHqiMzwi2tWsWawKuzIhyAwQZHicEDXJ
ncbjzNDJnLlTJiBlrzwpE3wpE3JSGmHOOIqLjXGmuJye75JdznVGp/bp8E9OdrmdnvPa31r7
RbQOhCIQEYEczpTSfZKdHiPDmeJpMqxPdkpGMspbERKc5ErKCo6NoRXBIfCGwOep5Bq8wqgU
b2gPq5RSfwXMhFD1WA+PSsns6WnXPj0lOTwiwq1llKTL8lhJHocuy9lX1ZkmOVfEbMp+bV0Y
dc+oUrCnq2dml3QPz0SmbJ6SnT3BU6SKp7Ir2VN55PHSeOUsT4wrOcVTxYXCWqbmPMDwmFFh
Lmf2VULlXefP5ZZk2hIrKuwqKa96xZxmQrzfT6gbaoj3i4hQdZm0LoG6I+AZ2z7dF3ZS9/CV
lFC1itvDMlTMJn9MiY4qZqw/Jid7hitCdVVKhv07rE9pz9juztgYtL7+jcIv4p0eHp3RvUcf
5WZmZbuSk33t1iHdk5AMT0Km/a4pK6pVRfrMDLxEX9UM7dM9VV2DPcVdib4EEDhVH/RNS9dZ
7Gye4kke2KF2Lk/VlGRVL2dKdkayr4KqLFf79PVUQx5eUdMZvqoG1SS3qoenZBI6JTolO71n
L0+FjPCeGJ+9nOnhEZ4EN5rP7UrPcqtecoV5Kh/G4yL0E3UuvFue1P7E6s0dUUHOdBbO3aq3
IHA2wX+uxDhEhKG7dFD1aGKcM90IJ38yPMVOoXy5ykGARyU1U1FcZU1qFh7hjvD93KdK4Xad
zChPUEBZYRDk1Mn3nL+tmi+1qlBlZ0pWckAFcxVq2hW0S8u/nky1hf1g5AhS3dnMH8Wj8OVC
xlCMFqleLO30UDtnuivL5XZhDCW0S1fvptpa92/LNFfL9p3SdW/bo6RDrpAvvq4v5KEIRPsD
LAljsEmVcH+36nBTHc4JNssT3dwf7cwOcrVMy1aFu+wCyYkvCC9tRTfPnFS3aE18mk2g3VxN
Ml3OMGeT7Mx1cmz37BUJCdmDUzL61FdluJr3zHalpceF67qmpj8fPlI9qii1NFp2SIyNge5J
XOEyJrZfkWBMTOuUvh72tnNih/SVzGBJGYnuFZGIS1/vJErQUqakSqgCThVQJaUiEKTTh69P
IBqrY4UW6HCPdQZpWZBfZlCPdcwnC/PLGGTCJ0vQMvWDTirdB00MdZvi7Km6Z7S7T3aGW31c
VBJdiV/DY7jiycNc8SsMZhX0BLuyEj0hrkQlb6TkjXxyS8kdGBiYddE4SidlZ7igpzCg0inc
8A1Frop0rpOyQ3rEd+Hn3REYal1Ap3RPgSrQ/WZUC6RrqsiAuKlnbI9MVQ/qmK7yOqKa93Bj
2PoLRJLmngIooYBdAlI00XnUcESmHugbdKDOPxYBz1i3x11FPTS9r1sP5zAPNXPVR7f7yjSj
1YOqurOLuqrrbxOfQnDUBOUUQN0oLd0nCUcQD3P7GslREDXv4UJUjwwnWltQjzQMdZ8uDQ73
SbKgEkV0liY43I4k9Vo8KiQ02FPgURSIX+UPeVR9kmaUw+32VV6HJtgJ8OwwTwhqFB3QlHYG
tA6imqu64HcCqqqSblbFtF9Hqa4R0Cyq0rokB6I9oVHNM6H8fflDIHHV9WcOUjoixC5jm0/q
UG9eEO3Oozqskx+4nosI+ImNcanJQQ1MCl+PgU3u7LwCT+cqsTFBeaWhWpydHRSafwZfewWF
5rgQ6rW+b30fvPDmiBvfBpcPImNOoI1VuJ8odDdkfA9b66Dc9KBYNeVIhRhNdWCTZeRDdzOE
GmjKUVUFP0lxIMp264FY25+bZVTLLENP3kNBqqlJovbsYarJHpZV4JaFmwySQCvwOBgNeTm4
b4qdSLdYfgqWiQyqpeDd8QzF07Y7jEqIFyjO8qLshHwoA9zU7R95iqooUE43kUg1QQ2Eu4lx
8AfA10uZL9foDVDCdqeY9WjYA/Ks+IxWOxrT9ryIPnKHqEQeUNd2O4Is/i/5eyCiqVz1gKw0
p8rXFKIu+nQVPZEfYjrV0Cymqgo+Fe89lcJt1wkeAuVAJVvmI51ixduUfg9vQq7YTI1YGMWy
MNkMbiW4HUBjkAaywCjIS8OdIgYhXV+5AswRJvICdhvjAfBQ2y1IZUQJqmk1oxixKh/eBDsp
9R85To0U1qOUxm9hXN9Cvu8hj8BzA+C9pDeAizn+UTQcEOgLhqHNej4wMfSaNZzeyosQchff
RWNBpO3Gghg+Vf4RiKhH8Q+KVZbKKuCP5C2pgU31AH8DR2dqYN0C5EPn/RRMBC2pIb+AdA8A
myhbWCtki6C/ZAuxW9a1PoH/KvyD8jAuD7bcWpOHr/Ngy3PSrwWt8Yw3Aso+c7csM9QmTrZw
dIS8HtXOC/9GLsoLvpNoTQuKM65TtHFdJsO14HYC1cBgkAUGgBdVGsFBHXKxEJnih++H7vQR
7SuHotkzurwPWFl6jGdStDXQflZezsvDtj/uH+lE5RXWq/DXk7/5oHj2A56nkcfAAV6RmA95
CVwEUoXNrxRSisGyFisiH2HbqSs7BbZTEttH4WYYdRWfPBjQv10d2aDSg4H6PwFa2a6iTYA/
F3wzDTSv0ei88OVyB99KxQG3XR+Pysu5mAA9OooG8fepHTtH89gZmszq0Bzt30hzjT3E4Z/P
LtEUYyRNM16SZ9kmmmwMo8kik6ayP2kKO4v4s5QF5hm3IatPo42b9DHiPOx92iDCaRNbRB3Z
YpQdRwNZbyL2ElioZu3bXnCM9blHdpTXhi7pC+Zq2VugZx7ZLJCFZxKfAmaAWVr+FOjD2yNc
GAwAE7X8VTCAV0C4KRioZe+Akbw4wmVBpJZ9CBawBajPe+BDLTsKfmWwMdgW8CnSHoO9UQKk
6HjYNLcLG7/CDrkOjvogupOkYAPkbsR/zV6RR+DuYUx+w2Jy7JUxygZBnWqKBfIXnw3hfUfN
aT57wTvZzKRuPnvBO0fZCNoO2CS3+ed7flF6fXO494rKo+ZuvkXeUfMw5srlopK3k5o3LbSd
mk+tYbTIHCJvmEO8J+05cZieC4tCxxeSe3xzmXed1q163vKuF5cwRvS85fVgbkrV81F5ud4/
7/CZFOSbS2RTzHcxeg4Zac8L39Hz/Dvvy3Bd5meoA/S6eYDGiSPExRHZUyyHXlU8QU8Kt/yV
f079BVqOL8H8CjAuK4qm+PYVU6my6EJdWAtqxVpgPLaQzwND6RR+XH4sBsrf+FcY0yXIxcsj
rV8nvCtviXi5VXSmurwxxaOvm4keeN5dws23qCGox+fKQeZJyjK/oCQFe1X3peBXdF/XZpF0
gEUa4XDPs1pyPtrlfbTJT7o/h1BD3Z/Pog0Vz6GPusunA21Ha4k8zv+N9q+DOBvbHmylbD2/
nWUGyTWOR+Qa3c/oV0dMgB0X7OtnZav6bS98k81AkvidPjV3+foatmYd0wEbdwrNdMRSHUc/
hMvR61YPtMkA0JaCQVdHO5T1ljxhlqSZZmF63XwI+dXYKAsbSI0NNfcr6qPf18jnAuyhcuYB
eRDfnhAejAUb28ZJU/aLCIJMkSmX6/GixpQaK7vBm9rWiNV2l9+O2EeJgKDDX0P99XgRG6ia
mAaq02hrEFWzZsH/Nj1j7od9Vgb1O0GlMOemWa+g/Oryosim4Ug/HO1IVhKe2x/PVPN4IspT
Y+sq1efdqLCCXdRzUJZopuYLzIEBc7i1AHNDP3nF1rnVQXN7Dnxaz2lXMe6AqCW/sGrJz81P
5WWRhnmskz1XxWM8NNH+J9Q8pG0MzDFqnrOeJLdPN2PuuUGDzN8wLqG7xWB6HOkf56eolUpj
zSS3GE6tzZXUhl+itnyMvMnHwpYRePZtuV/0xXMwN4vGKO9dvJsNxuobCjaX5oJI0Ih/Sj+B
cFBHBNNu1pfGgRjeldbxjvQQ+my8HtO16HHmwjrGQzXQl9tAJtgPhqKPNoLe4HswUuXho+RE
tpl6gJ7gefACxlVP0A0o/3P8OXwHjeQs6IHv+W06xnvRId6I9sIGaADckBmgpCOepoH3/S7e
sRvka/G9TQXz2AvkZi/ILWw2BbHZcDdRCtskDzA35G64w6kQGy6PI11/pNuLdOFItxfp0pHu
LMr6DWwGrUE98TW9J56kCfDHgKnQ46f4i3TKhP43hxEFNSZyVAPJ2i1hLacNCqw/fzK30lbz
IE1in6PNb8uvxRrYi4UoAuWEwC0u0ikY/o2Iuwzdehv+RqI1xlEh2Du/UVm+gIryvygELgOP
WpWocdDj+LZuU2FHbYzZOtBbH1JL9iv6/k8846L8UWTI3fy0PICx3Jt/AVs2gaqIRHkHZVYD
TUAwnnUcfAPOIJwGVL3CEb4uhlIqW47xtRDt/TI5+L9QbjbG4W5qge8hlv9ERfghqqjqA+L5
AuiXBRQKTFAK1ALtQUHwEOrnRv1GoX4Gv4jvKxllniaHXb8WvvqBQvj+cupHxWy3jF2/fr76
YUxXhf1gwm5YjbHloRHsPI1hK2k8O07r2Dz0/3maDv9sth/p9tAytoMWGTtoI+jKq8pryBvE
VmNceOQmdl7uYCsx3x7HvD1P/o7wQXZcHmH7kW6PvMJ2yPPIJ4wdcjHm9SDkjWCD5SE2FOPl
Wfkv1k/+xjCPsUx5mU2Cf6C8gHTZSPceGwybcCjG1LOwb/rh+xhJY1kmPcsmwT+QBrMD3h08
Bjp1Angd83mS7XaSx8wZ4Ca10syjePMs5p5TWH85yG2uoPrw1zcHyy3mXkoMeoESzQkU5/gL
88ptSgZN7bFaDdS3aQjSQBQQwLRJME9DJ0KvWatphGiFdAb0N8pR9oayA9ScaSUirrf8HPZM
Z3xzM8AEsEZhraVh1lojyO8Gj6IZVjQ9L3pRJeNn2DoA/v8So8J/sn+jCNhzqcdPyp0AMrkN
bIWsAebUGMyp8n57Hlah/PHvTVilaGx+2HsRzbWbs77EPFVPfmm7X9kyuHIn+NovC5hfYvgF
uRAsAO+BeUqubcjr8vTdNY3cADxgHViuZbf+Bv/64FYOrW03Vbn2WsBSrpgof0Db1/0P9k40
AfsdBBtxbG5gx4RRWcwJ1wL2F0oGEKZkZt/88e8JmNn5Y+8DVFDuA427zdSLX6bSbCKFgo5q
PWsWo9o2T4uPoZd8dIYN9RzWeC7MaQ3UOjZwjR64DheDKFTE+bDW3IUXo1Y8mFbzkvQtf4pW
s7VYA82g5Xw0beO9abnhoeXQG33YFbi9MW7mIE7Fv0M7lUy5PBRxE6HvPLSXj8A8WYz2i3fo
D7YTc8Ay2sWepOawRTeBPxnWOKAsvp2SoDrfbAisCT/ixY2ioCovSLt4Qfm1WmuAOEMaoSAe
FAV1WW/vEXCALZX7fBiVQVNjN9bHS5EnkDFyDTjBI7272PQ7W/FcF/JMA+/x2t5DmuLefbyg
9xif4v2JV/Ae983bMplPkU+Bv4i8+1HvYaruNqttSiqM3epZKHM6GXAnoS41QDKfY+znc1gB
5F9h85hNdQXqtxRsV88SveTP8IdhTXiWTzFqAqwPVRnQhXPwPRpyrDDoG31Kv9QYCBYYu43i
oBraaw34Hs9uhjLqgHawt+qoeml+9a3rIC/OV2DuWGqkgG6OLrDTu9Avji4Gwd0A/oRsvvUj
/cvaY5RBeBW4BNkG47K8aVym8sZReQNlRdBfxEAN45a8ZNyisoYk9BHFGrPkZWMWFYEsArQy
pDwOeTiDyyTSdSYHaGykwhZNpWrGerjrKc34Uq4DZ2FjbuAVjRC4KwFW1lgjfW6UFQ8ZHcEM
EAZagxHgU1AXPAtagAl+1+jm3Y93/xVcUW1hpkP3DYBNOwV2XQ3YJl9Rht4fPwn5aNgFx6kA
1jM94MbzZbKh+QzWVhsojrWj7ljnVxM9qZajCI03E2S81r/9qLNZHmvBEVjTMuhxrFuxvhuj
1jPmEOpi1kK5nfAOB+Tv+OYL8CP0iLIZgn6lBkF1YZ9XozizD+bG37A+aoQ1DOYF6Pz6Wr/n
s9ccuP9vVvLty6v1tH8+wDMc/rJVnKM86nVCXlDr7LvzjvxOzTtYj7+r9uuRr4HKK8ZB96t1
Wz20B56l6qvX8LCjofdj9T61PW/lnYcwj7RG3AjRRPaCbV9bhMg6sEEXitfkFbMr2g3rfdh8
5dT6EOuzDDEPa4rVsJlUndQZhkbOynVuESK32e7au3OlfAIUy3VO4T+X0Mhh4ADeLRLv9oL/
zAE253zeXZ63aQwaqHWpn7vnDfIa+OWe90u016u5zhLkCvvsYF/AOcJO3/mBPAfagNpmPbkX
LAX7c/rxM5oB2uc6J7DPCgLOBZrxaVQFYzEa6/sOeGaE2R3vshVrvLPylBq/GKM3YavWEmPQ
lvUoUrTDvPyhvedbh9rrPdyOkDeVh9XeJRsH++uI/FjtRZpzfPuLvDbmuwt6f7CrKE4l9N7a
eawth8rlaKfbjt74Fv7Aeq8R6oFyMbc8Yc/t9+7p3cLaIGCvGuXP0GtSPNtvD/AlcqFae6py
9b5tXV+5gbYFnvGV3oe18/j3PnOegzJ0vq+RrwLVUHX258+7n6psBTZXbheHsYbcIy9Zz6Nu
AOv1QdAthn7fkTQE9ssGliEHKUR9ime3sD7wUhk+nVYqW59HweYuJ2/wg7A5V9FotS616x0J
iuBdR6j1sW03XQO9bX/nuzaTbA/K+ffX1bye0wZ1sabQrnwKPG1c9xbzIfv69p3lVdABsnM2
7UBdvRYfmGvvuTjyPwcy7tlbtveTfe3pvWDzi72P/HLAnvI4vW+8XT7Dtns3g5UorxN4BKQH
7OEW4JvlT7n2bv37tzl7td7Lqj4oa7tOo2w3tZ+t9qanqfEiP0FcJTEM7ejCezZEnitUjrfE
OueCPMDbUJQ5Gzr7GiXp/ZyKWAOsIiEqow6Loavaanll2G5lRFOK5LPQ5+kyQZ9bVaFH2Ajq
AnvuuDApxppGbcUqGadsOOth2GufYT2n9oUGIZ/a7ztIjdUejjjis+X4DehydU6TDZszG+uX
lynUsZtqBMHGMl+GvviL4jBPxjhmQh/AtsRzWmmbMb9zItv+1Gd3/nM1095LAjxb3vKXreKs
lVj3LJQX9DlYju0ql6j3ZGHejXhWO+QrovNHyA/0Gddi4rreqK/ep/oS842F91N7obbtm/fs
DHq+KuLm8FVYa96WP/NRcjyvQaPQZ1vFYilFDHTaVDlA74Uthx6KwPjYhbW1Wn/XkOdZNdip
FlhC9dR+jK5rXZSpkUNynUdOl+Nsd8RdO1yG86neP3OdP/rPGzXI86aci3d+WO3L+c8ShSlH
+84TMZ5vy5LstveG2p/zc/ccUa4Bc+55b985YWzuM0I5Jc8ZYeD5IMC3O8p7E+0yBwwGMwPO
AR8LPAvU+37+M8C7530V8C5LUI5UaRA3XI+b27B52ssw1KcS6lHarIq6NEX9piEPxjrG800R
jPYclM/5m2JY7vA9Z2/58CDnPw9y5mN5KDToOvTYbqwjPob/KvyDHpzANcj9yJW+DZ7zBsID
bc76XBVnhtpgfePoeJ9nD/vP6oB1WIKt76N956/yCH/B1vdtMJ/8jLXXBeiqIOiwDNjwat/1
cVALY7StHCha2+eUraG/fqL+fB+1R1jp0kgFy8I8pWgBexlzH/RwXV6XErDmcoiPtH5/wkbN
EdW1ru+DeTWeGpqbwQdUV+3/Y47bpflBcwjcYLPIyWZSJ34GdTujypYHjQsyhjWR6cYFCmEL
ZCT0fVG2kZqKBVQa33mSaEyPQ7efMa/JS3yrPMNX0wBeV17kewHmX/6x9CgbD8ziL8pr3E0O
M5Y68Kuw9+pAL3WAXfIkbI5FMor/KI/yOKoo2uLdX6QIlcd6H/PwBYp3tKd4syh1hg7pas6g
zlYbjM0TmKs24VuoQfX5H9KL8h7XVJQrzOFynLYtoqCTlf7uDp3WHe2dQVXVeRnmyz1sgPyW
H4Xuvyml+am8KoainT6Ebv8M9nk2+utVtFclami9jPZYTxXQJ03BY/zf+ObOwCa6BrcjbOtX
YPsNoiDzGBXGd3tCFKChVgPMCQPlad4F3+ZjsBHOyM1Yd8XCJlstnqJHUMYj5iJ6RrSQX6k1
tShFjfS6uiK9nbOuXosy/mldPRm2oFpb36AP9Ppara3tdbVeU39J47Gmfk2dXULvjNfnn/bZ
J1sHnoaNMoCGqjNQYyR1Vmefuc496yDuBL0Lpqoz0Jxzz3/TaLSnPv9kH9Dj7E95i71Aa9gh
msF/oLVsC9U0RsqDjGBnX5LXkc5AmiT2grzDzsv3+Q9Ssi1ytNUXen8rjRfb8W3Eyo8cz8ib
Zqq8jrXAEN4NfdcQnIPNHEsOPhj9Ug82qotm86NyhzUXtkd/KsHmUQnRQ44WR6mk+AkoW2s+
bIcPsTZZhG/pKYyvpvJnayu+hdfUd6lsG8xh72GO6i9j1BmzeBT2SCrsw3VU1MRYw3rMZ2f2
09/ot7A1otgwfBOd5S58E6liDeyaSfJHtMM4Vp/msIH0NjtMs1VbqjNlYzPe13eu/Am+01HG
SvoQ7Tvd+ItGslh6yNhIE41V1J81o5lox6mqLfnDVARMBnPYVZrP16K8+pTFgqkcK0Yf89b0
Mq9Gi3W/HAebqRXiB7L5YBf1Ze9SC14SfXIJfXeRJqmzbHVebVxDvxYEq/EcdVa9mCYba+kl
nkQv3T33MAysf2+ofQI2m34HO/x7raIldFpLOq73YtQ5dm+9J+PiFbynWW/v76yP9xdWj95S
oIyXwBi2lF7MQw0wE6xRZ+vqDF2fmavnhEE35EE8kRvIkuD+HVXzgvTKjcoL5A/BvQfIE+Hm
R956/F26xPvUIz95NNx7+G/rcZ9yXXDv4T71awk3Px60Hn/XzpFw7+E+9WgDNz9y1QPjqruC
1/buFXOMYHV2h3BDm7FgIpsuv2G9ZTd87135MZnFp3gPsFq0HnF/gYtgGkgXCbKNgjPMrRWJ
NJG+PUJHUfoGdGbn5Gm2UV5iZ+UVzF3vw/+rcRDzSgDqTD0QojtvK3hllBdIpM3fya/kwS9X
9zyK41m+Pc9QHQ6keB7ylMOqkwnC9N6Fug/6OPrI71alieKyNOEm6z2UvtD3T1F58wvM19/C
7q+BOSsRNvoT9CR/HWv31+VZfW9hv7xjfYW4+tDJ8ViTqrPgHlgP+9w31f0DPlH+rOwcvkMe
Fhew1txDI3hT6Gus90VbWVoch57fDdvbd09R+Fz5Bmzb/iL4zm1l4+o1wE7Kgv3wqJkGG2Ao
6ufQewsx4qBcIA56u4Jq4CLC8+G6QXU7nAwq5TlrmYW4LuAxcNkOd7bLuGYtkpvAAmuRtyuo
Bi4iPB+uG1RXYX7Su5GfvPM8eBb+TQH+7iDVLOj9wix4ZwR4Fv5iYBP8w+1wKdAdpNl3Yj6G
vB/oAX+IHX7KDhe0ML9aW7wbHF95h4L+jue93+UNs4e929jDd8aB5+CPyCfcB7jZwzINjDTd
3nOm+84aMA7+s3DXghfhnwV6ikSvumfTU1S6UwjEgC/BTchMUYm6gDHqvo055M4HYAj81cEp
+Jfa4RrgDdDNvptz2or3ZoDa8FcB++HvAWqqsCNZ3nAke08GhXlHg3aOb72fIXwJ/jH+cM69
mv9H/Hd0/o6cezsPhLzxnwA7P4S1kK+A8aA/wsF2WNEPhLEW3nNwM8AfYBSoDPqCPv94j1Dd
F1LkvieUHyGgQB5ZY7/ff4/o/4P/9OzuQbEKgpL3J9e953zIvQfx32O1AO77Y987egMMAa8i
HAl3kh1+AUSASH3PJQy2Y5hUd7cSQS8w+p/uSfv3PNSehNK5cEfYbge4/eD2tMP++IG22wRu
M7jq3k1qQHx3260AN0HvJQVTW7gJcNv77sj977BmgYX3x9b5r0O3p9s6/rwddvvDth7eYBX2
DgX9zR3e7+4J59Zj7eBPAJcC9Zg9d7yOOSLdnjvO22F3TvgB9LmtD09D92Vo/ZfiTbD1YQ9Q
E/4qeW0PPiePPRHoD7AnVB6/zaDsAuMP6urHnEgkJlEnfedyJtbtg6i24yHf/T5xBd/AKrCI
njCr0HR19mD+SLUc6XCbU1d9d+8azbDvEnSAfbDDMhH+BuueKZqaVmVKU6j7gereoFhGtc10
uQbtX8t8EvaGutfX9u7ZlDrXUn+XYtYht8J/11CfRfnvGwaey6j7f757gz6mUA+s62qq+4F8
EBlih32uMoCCrVeprEWwKWvT644wucZRHHUoCv1WjKap8z4zWa4RI9FOd/Bu6lzEwrp0LkVb
y+w7dC2h4xuAUtRUTIYdNAX+cxRlXoE7Hmt82EFqb4Z/j+/oe3pUMH0Xro1wUiusN1OFhXXK
cdgwx6m6upcnlD0/XH4h0iB/A+uXU9TKPC8vq7bCOpf8Zyj8gryN/BEK/30++/zDf+7iu6cH
+Bh5Mted6VNUWd0R1HfvLKy3vb79eV32I3jnZ6gn30S9rGryC6sN7PW21Ei8TC3V/pUYiLpd
g+5S9xNv6fuThHESa5W270vWpSqiNwgCS6BH9lCMWQ/xU+gRrWuUbaf2TH13HnqJTnKH2ZaG
iCzYc9VBF/QzbEWF0nvqHqa+a7VULtd/93FC3YWk0dbMu/vfau9c6+am6kyLIu27m1zvd/vv
b/rvZio7U92r3IexvY8eUfcyUV6yugeq7l3yCHlVdEZbqH3aMhRu3gZjaTL6dzLG4XJrMMra
hjXDK/SMOlMQM1AvWPpBwO+yT4D6+62OkLWDuxHM1n/+Zf/IQyBKFFJ3k9GGB+VN7r3zGGx6
A3buGb1Wr0zPiRVgJc3FmvwzNo2CzAiaIjpBt6pvbI08jbwF1dgyx1O0owvVssKpumM2VbbK
YZ5W59bXaEjQBSovnpfvis8oBboyXdyUR0VF9EUcZah7eVYEdTZH0AlzHp3Q9/MMda+PHhOp
xn6RSl8IktcEGZ/78PvlNUcRelE8SS+p56AeFcViuc1MxrfnwPf5InXGWGouqsj3eBcK5bul
R7SnTrw++qUizQMTwKesg9ESdGQd0F4dqApbKi+Am+Iw9XBcoVKOo/K64y15zDGD4vButcxa
cpWjGsbGj3K740O835/ybXXvW/wubwdtpTRzPWUgLan0+I4yzM002uTqO5JrrLb4Jpncbm3A
N9VLvq3uQqv7qY53MG48GPddiFR6Xhvf61ZqbX6nzxiWQWfEmKnysHWVYvgsuVTf8e5ErwWl
UqpZkdqptAo9rnfodel5tIfp62Nve/U3fMxNRYwd6P+R0CkFvceDF9IJsZdmsL30f+zbeXgT
deLH8e/MpE2vJL2hR5r05ChNSzlqASEULIUKPehwylFoaSuF1rQBRSsouroq4IEXouAtVqGE
w4Io4I2AoiIqiuJ9IId4Q9PuZ/KJ+6C7z+/4Z9fdZ4B3XjOTaTr5znfS9iFdqoVlD2zUtv9v
4efJOZhAZ/HYQ+AJbTb5XvNXnfNzYtrv1+UJ53wdeIY/1waUygZ5cdceJU0KV1ZJg7DPS/j6
YcfDzUC18jW+95OL/0t//HPu8WAcDhtipCwlTMRi/RMemyQrRVKoMgrdimUku8UjSp3UB/sf
Qx+j1f7r5AOu+y6toICV+Jq7srMJ/WLI9n6BfsbPrBNQ7T98r+fvH77f8qe82nWaibG/+37i
nO8bMN4z0RKEr4re7dp75RFmbMd5qAbFo/6oL6pEw1ELwqh3XHeO2v1VeIwrUTLr3AfXwaHM
97lQRxfzdvi7gXXe5m8182azzhrm2y/7D4WgAkwZ7XOFoavx2HvRbmx7ER1EO7H+BnwIfY4w
r84exbZBzLuC+3v7wf34XAv8vc28x5nvY7TjHux/P5fWVtZxwF9vrA/Axz3hbzfz7vSH8fWO
RPXY9yXc9zDz/hbu61iPbSvYmUvxeZ9CXvQk+h7bMKZnD2M/zOezePXtwMvxmUex/1R0P5qF
HkM4nq5YWI7uQhj7zkfQZQjH0lmH8GreeSHCK4tXe+5R/sf4kvt04VrvXIr2IHyF7lx8znP5
rff98+dF/+/PaPOpFX2F5iIci7eF8+vvYp50Lmcd2vvJHvxDlf7q/WPlH19v4h8K8Wfyl8A6
Ovyt8/e4v9PMa0Ta+9NW+T9fqP89bQn+eZSJMlB3hOu2A+em4zb/7yRhrL1D/a1F96L3/GP7
yTnPGdeEN8+Q3TkUPxdISEYztfeJKnu7Rv/u9/X8vwuI18DN/87wPVm+9t5uMbbr143BSrv8
oCehv61dvscTPwAsJy5PXB64hDSSizzd88FUMoWkeroNBikkmdiJjSQRK0kkcSSBdCfdPLGF
tnbpY3KUfEQ+JEfIB+R9cpi8R94l75BD5C3yNjlI3iRvkAPkNbKf7CN7yatkD3mFvExeIi+Q
58lzZDfZ7onReN0To4JtpJ08RbZ6YqrAFrKZbCIe8qIPpb/HlgX6kVzSl+SQbN+5VRxcM3mS
skGoD/msx5oDzpBfyM/kJ/Ij+YF8T06Tw57EfuA98i55h7xNDpK3yDYeSxin21PkTfIG2Uo2
k3ZOxQfI/WQt2ULuI4fIarKGs/Umsoz8lRPsL1y7ljRwCt9IriPzSD2ZSy7mh6tkMplEJpIJ
5AYynpSRe8k4cj0pJSVkLLnQh2Lh2hhSTGJ9k0iOIfNJOYkmUSSSRJBwYiFmYiJhJJSEkAoS
zEm7i7NuJ2ddEueSlSSSBBJHuhMDp5vC6fYlp80X5HPyGXmZM+Ql8iJ5gbPgefIkeYK0ci7F
84QP5PAMILN9R63E8iBiSDSJIpEkgoQTiYcreLhdxEs6yCc83I/JUfIR+ZAcIR+Q98lzfEa7
yS6ykzxLniE7yNNkO1nHJ/0YeZQ8Qh4mD5FPOSC3k5XkFrKC3MapfytZRC4jl5KF5GaygLhJ
M2kis3h1zCDTyTRSSfrzrPQjuaQvySEzSTZxkCySSXqTXiSDpJM00pP04AUkcwr34RT+ifxA
vienyXfkFDlJTpDj5FtyjHxDviZfkS/JF+Rz8iP5jHxKPuH8zOKs60MySW/Si/QkPUg6SSUp
JJnYSAincDAJIkYSyCn8HWfkKXKSnCDHybfkG/I1+Yq8zhn5GjlGDpD9ZB+n4qtkD3mFF2wG
1zycim1kA1lPVpG7yV1kL3nchxLAyXcHWUqWkKvIYnIlqeZU3ETqSC3nyxxSRTaSC0gRKSDD
iZMMI9eQq8mdZAgZSgaTQSSfjCajSCE5j+SRIE5hIzmfBJIAYiAK8c95iYwkI4ggl3MOdpFO
bqzhmpd0kLPkDPmV/EKe5VeEZ8gO8jTZ6Im+EbT5kFt4Aq7wISU5Xw4vsP1sLrL9hH40jbF9
gj5GR8PG2V5EL6Dn0XNoN9qFdoZOsD2LNqNNyIM2oja0Aa1HT6InUCt6HK1Dj6FH0SPoYfQQ
ehDdH1JrW4vWoPvQvWg1ugetQneju9Cd6A50e/BC2y3oZrQCLUfblPFKqTNkgm0ZVm4KrrYN
D1bKlVJRK2xKGZUe8ETl4knfT9Z6IrUhWENuITd7IpxgBVlOlpGbyI3kBvJXcj25jowjYz0Y
3HbpQlJMxpDRpIiMIoXkAjLSY7kAjCAFxEoSSQKJJ3Gkuwfnsl3qRmJJDIkmUSTSgzPdLkU4
J8If0PfoNPoOnUIn0Qmc8Y/Qh+gI+gC9jw6j93D23kXPoB1oO9qGHsBZWokT0S7dzcG+i9Rx
YGpJDZlDqkkVmU1mkUoykwwg/TlM/Ugu6UtySDZxkCyOTx9iJIEkQGObUqKM8wy29d+pjBMj
UQVSunZhY68+hdt8C5Gxhe3Sk56oaHzQE56oBNBKHvdEpYJ15DHyKJ/4I+Rh8hB5kNxJ7iC3
k5Wcj7eRW8kMMp3Pfxq5iEwlU8hkMolMJBOISirIeFJOykgpKSGZpDdHsRfpSXqQDJJO0kgq
SSHJHGg7sREDUYhMJCKcSzFLu1An8qIOdBadwbT8Ff2CvkXH0Dfoa/QV+hJ9gen5OfoMfYpe
R6+h/Wgf2oteRXvQK+hl9BJqR09hCm9FW1C7tIFnZD25j9xLVvOM3ENWkb+Qaz0RDnANR28p
uZpcRZaQxeRK0kKuIJeTReQycilZSBYQN2kmTcRFLiGNpIHMJ/NIPRlOnDxpw8hQcj4ZQgaT
QSSfnEfyeAoHknBiIWZiImEklK9IISSYBDmz4XGckXfQIfQ2OojeQm+iN9ABnKXb8GJzq+8F
Zy4H/2LnfDyPa5V02zWKw7ZUctiuLlqiXtW6RF1c1KJe2dqihrYMbiluUUJbEsDlLa0t77cE
XlG0SL28dZFqWBS9SA65rGihemnrQjV0oRS2oMitVrg/c//gVqLdFe4qd7N7pfsgNhgfcm92
v+BW2rt2OSPd5w0uXOK+2S1H435ZuCWLttnuDjUXNhe51KZWl2pwpbkqXEr+KZckO13STFej
S8ZOm1xpPQu1nRNcsfGFdpfTVepSLilqUBtbG9T5RfPUk/Ok8OEhiirs6ABShEWpECuUCmeX
LOob6+Xgi/Fs6xw1am1rjTrHUaVWt1apsx2z1ErHTHWGY5o6vXWaepFjijq1dYo62TFJnYj9
JzgqVLW1Qh3vKFPLW8vUEsc4dRy2j3UUqxe2FqtjHEXq6NYitbRIGuUoVC9QBtrwlVQk4V9j
0pKkU0mG0JnWRqvcaD1qPWVVGhNPJcqLEyRL/OL4FfGKBTcyb+JscSvi1sRtiAuw+BaUsMbI
JZFyY8SSCDknwhlxIOJohEFErI2QLSssaywbLEqJZYblpKXLYthgkTaYd5pfNysl5hnmBrNi
MWvrSrjT7OhbaDE5i22mbJMyJNs0zFRiUlaYJKfJkVvoNKX1KBwWVhI2I0xZEyY5wzJ6FZ4M
6QqRnSG4wxmckYWbbgmFQpHskiSkcKAEaedCirHhRV5sipUCJHxPsLFifGZmcbuxq7y4Lah0
apt0fVv6eO3WWTalLfD6NqFOmTppoyQtn7xRkkdUtEUXl03h+rXLlokCa3GbdfyktrXWycVt
S7Dg1Ba6sCCsG2NFweTM6U3upszMzKbMpmbcNk9vwpZmN/75kHAL3c3aPc1NQtvxn//R7uYD
ZTa5Z+CjfduatMd1Z2prWtrn+JP/+bMdofSnH7H/5j/dZ0wX2v9+djYpRwPMeNkzisFCFRNE
yZas2KzYoCHDQ+RBYrQwSm1CFnZZ+289SdrojDTI6XmBSlmCKaKxTCobaZQrxLAjHx6Z9uGR
/XC/lH3k+KHj4d5DxyPz87Oz++ZIEckRvqLNstEYGJia4pDz8gYO7Ncvd6g8oL9DTk0xo4wB
/YfKeUOVfrlJsm9X7unbip21rcrRjhKl0JsmL7CPrC1KUrLSY22RRikuIDU+NLugZ6TJmp2a
MahXfGCQ0RAYYgzqkVeQckHNyJTOvYYgc7A5056YGhVoCLaEmnolx6dEGTszAsxnTgeYz040
jDy7Q4kYWD2uX+BlplA5IDjo0eSEpJzBSdHp1giTxWQ2GxNtiUZjpCUk9fwy733BiXZriMkc
HB4TFmq1JYWYw4Issd5kIXcdEcIwMCBapIoeYoSze7olwxyfZjVbeqQZrea0dEt8oCG6vEcG
vhPYbKhQKnpuVwqVUWJSZuawYcdzh0V2y5eyd+3Oz8+N6Kf97ZuTjmFI9g2OIU/yjY6hW1Rs
bAxGSEqVkg0pYTkpHdNSUgwBASFJSbIxODpjaP+e+T26mQKlGwMDDAHGznukzjFy4jBrij3Z
GJ/Y3VqQp2yOiAlVJIMxLCqso7R3XozJnmJT9nTs+Pv/DEulenp6enp6enr/2cmRenp6enp6
enp6enp6enp6enp6enp6enp6enp6enp6enp6enp6enp6enp6enp6enp6enp6ev+ehFmsx63i
++XtKt+ttmwUC7Am+X+pO1cc9i8rIk4K8y8bsJzuXw7E8lD/slEMliZqj2IIxpZE6Vb/sizM
0nr/siJypR3+ZQOWT/iXA0WubMeyhGUcj1zuX8bxyFvFOmHHseSIvri1i7GiTswWLtEgmtAc
0YxtI7DkEo2+20psqcPSfOHAPcNFPf7aRTm21Yha3NfkW6uG1dh7AW6rsOcIfFw99pmFbXXY
o863XyVq9j1mFfabB11iLrZpn1e7pxZb//kR1fjW3Tim3/aeDedhvRJHVuf7/I519tycvrn2
sXWzXQ1NDXOa7SMaXI0Nrsrmuob5Dvvw+np7eV1NbXOTvby6qdq1oLrKUTyusGjk6MwRlfV1
s1x1WQUN9VWjm7Ey+/9/h3+Lva7JXmlvdlVWVc+rdM21N8yxN9dWn3NMNa4Gd6O2eXbDvMbK
+XXVTQ5RLMaJQlEkRorRIvMPY6eNbQ2eeb1vtP6nPbNEAcakHmM7GmPGe2b/Sz7iv3ZG4erB
1Wipl+wiXHyM60eG2WKmEKbobt1wzUm+qzWgvXzLgyuPzLAM+VHEBfku36ePXbFPc+/hbR+d
udS7LCTJuAOr2vXru77/JsAApH4LeQ0KZW5kc3RyZWFtDWVuZG9iag03OTYgMCBvYmoNPDwv
RmlsdGVyL0ZsYXRlRGVjb2RlL0xlbmd0aCAxNjc2NS9MZW5ndGgxIDQ4ODY4Pj5zdHJlYW0N
CmjetJsHfFTF9sfPnZl7NyQEQgdD2bhJaIkgvYQQUug1Ad0FhIQQmjQRAQEpooJRuqKAgAVR
EHQp0kSlCYqK6FOKDxsiUgRBmkDY+f9m9m7YhKi8z3v/kC8zc6bcuTNzz5wpIYOIwmkKcera
JaNOvbywLZUhOQoys4dljax0JWYV0aaPidjH2WNGO3t82cVNZCQQWasHjBw47JXTyauJHCeJ
ipUZOPTRAat/WFiKKOc4Udl7BuVk9T8zt2ka0QdIQ40GQRB+tdJBoog8hKMHDRs9rtPRS4lE
pZxELVYPHZGdZVSb/BXR+LIIbxiWNW5kleKV2iP/s0jvHJ41LOd0rdmDibZ6ifi3I0c8PFpe
QgxtnaPiR47KGblz4njUr/NnRBUqEBcd2DYyKcRcaNZHrav6XX6AtjIKIVbSwbgQoUz8SEwm
0WqJUlR7UKcMp5OiiHzSIh8Zux1LWayTjGUqjm83S6inocXIsRRp5tOtn5E0lV6it+hd2ko7
aB/9iy4aoZRJT9KH9DOdpj/ohkGGwyhnVDZq0v/sxzfNHEbhfDtZVIFIXpenfCvlKSLU9JZk
PkIVROwtiSwtzxaW+eb7Nvv2W2EUofNGsE8hPW+clddZSxWWjVSYTVd+neO8Y6nvHd+yAtXp
izceTiPQGg9RPxqI0CgaR+NpAj1Gk2gyRts0tMhTNJ2exv/P0kyaRbNpLs2j+fQcPU8L6AV6
kRbSIlqM1lxCSyFfgPBSHUs65mV6lVbQm7SKVtMaepteQfg1Wk6v0xuQroT8LYTf0CnestMs
hWQFZCvtXO+Ql9bacX7/OlpPG9B77xQKb6LNtIU22u5Weo+20fv0AXp1O/p5p/2/PyZY/tc5
PqNdtJs+oj20lz6mTzBWPoXsc9pPX9wmL0oWSPvXpRygL+krjMCv6Rs6SIfpCH1L/6bv6Qc6
hrF4nH7TKfyxR+k7xPwI6TE6WSjnofy8/lQ/IN1Pdhkn6FekP0Vn6VxQHn/6o0h1kq7QVYz5
EOMuo4pRwihDl+lPhMON8oi5bhSDL8qobsQb9xh1jAZGQ6O50cpINtIRqktD6EGag3HxHHrf
Px4WYTyMxTh6GjI1Wvw9vgJf3cr8Xn4H/aZ6bTHaXP37ULf8ziJa6nO86ZvItVb38e19tdPO
8THi92HcBadSPbmrQGmqxVfpGqhxsxUpttu5P8nvjW9QytcFWvMY/YIY1W4q/rCO+VS38g+6
lY8j/oTuBZXK376H0L8H80vYjfr+hLxfoV++0qlUrx0BKs0nSLUa8d/bPXeSzqC3VJ+dRuhX
+LdpzfQLaqz68mc77jPEnIe+uoSe/Z0uwHcRfvVvByR/gHOQ/o4nXAQqzRnU6zxq9Bv6+A/0
+lXEXIP/CuXh3yXU6DrdgE/FfIuYKzp8gyRUrIRWNAxmcMiVn3SePLz/TdTGh5Q+w6CbBjeE
YUF/hmDkhBphRnGMH5VTS/ylYFQxpFJxIVqi09Of+elLGhFGKaO0UcYoCz1cHqWWgKy0UdGO
KRaIMSpAViIofTlMD0pWybhLzSaG04ii/dDkVekKxndljHCncTdimVEF/fyN4cLIrmHUNOoa
9Y2GyBFtxOBpaqQnGi0NFyQxRqxRHW5tvB9GvJGAmFZGqpGGWGnEGY3wPSQarYvS+WwhvgD9
A/192CxhmND/O1lnGofwIYzBl6kruakPDTFPss+SWvft80DvXj097h7dM9K7de3SuVPHDu3b
tW3TOi01JblVUsvEFgnNmzVt0rhRwzr3xMfViI2Jdt1drWLZUhElw8NCi4U4LFNwZlBcmqt1
ptMbm+kVsa62beNV2JUFQVaQINPrhKh1wTReZ6ZO5iyYMgkpBxRKmeRPmZSf0ohwJlBCfJwz
zeX0fp7qcm42enZzwz8z1eVxes9qfyftF7E6EI5AVBRyONMqDkp1eo1MZ5q39ZhBuWmZqShv
bVhoiislJzQ+jtaGhsEbBp+3hmvkWqNGoqE9rEZas7UwE8LVY708Ji2rv7drN3daamRUlEfL
KEWX5bVSvA5dlnOwqjM941wbtz332c0R1C+zdvH+rv5Zvd1enoVMuTwtN3e6t1Rtb01Xqrfm
+OMV8co53jhXapq3tguFdUjPf4DhNWMiXM7cy4TKu87+VlCSZUusmIjLpLzqFfObCfEBP6Fu
qCHeLypK1eWZzUnUDwHvlG5uf9hJ/SLXUVKd2h4vy1Qx2wMx5XqomCmBmPzsma4o1VVpmfbv
mEEVvVP6OePj0Pr6Nwa/iHd6eWxmv+xBys3KyXWlpvrbrbvbm5QKT1KW/a5pa+vWQfqsTLzE
YNUM3dzeOq6R3rKuZH8CCJyqDwZnuHUWO5u3bIoXdqqdy1snLVXVy5mWm5nqr6Aqy9XNvYXq
yx/XNnBGrq9PDcij6uEtn4JOiU3Ldfcf4K2WGdkf43OA0x0Z5U3yoPk8LneOR/WSK8Jb80c8
Lko/UefCuxVKHUis3twRE+J0s0juUb0FgbM1/nMlJyAiAt2lg6pHkxOcbiOSAsnwFDuF8hUo
BwEek9JWRXGVNaVtZJQnyv/zN1WKtOtkxnhDgsqKgCC/Tv7n/GXV/KlVhWo603JSgypYoFDT
rqBdWtH1ZKot7AcjR4jqzraBKB6DLxcyhmK0SPViRaeXujrdrhyXx4UxlNTVrd5NtbXu3w4Z
rg7derp1b9ujpHuBkD++iT/kpShEBwIsBWOwde3IQLfqcBsdzg+2LRTdLhDtzA1xdcjIVYW7
7ALJiS8IL23Ftst6pknpBvg0W0O7uVpnuZwRzta5WZvllH65a5OSckemZQ5qpspwteuf68pw
J0Tquqa7H4scrx5VmjoYHbonx8dB9ySvdRkzuq1NMmZk9HRvgb3tnNHdvY4ZLCUz2bM2GnHu
LVg5JWkpU1IlVAGnCqiS0hEI0ekjtyQRTdGxQgt0OHuzQVoWEpAZlL2Z+WURARmDTPhlSVqm
ftBJFQehiaFu05z9VfdM9AzKzfSoj4vKoyvxa3gNVyJ5mStxrcGs4t5QV06yN8yVrOQtlbyl
X24puQMDA7MuGkfppNxMF/QUBpSbIg3/UOSqSOdmKbu7oz6PPOuJwlDrDXq6vcVqQ/ebMe2R
ro0iE+I23inZWaoe1MOt8jpi2mV7MGwDBSJJO28xlFDMLgEpWus8ajgiUzb6Bh2o809BwDvF
4/XUVg91D/bo4RzhpbauZuh2f5lmrHpQHU9uaVc9/W3iUwiNma6cYqgbZbj9kkgE8TCPv5Ec
xVHzbBeisjOdaG1B2RkY6n5dGhrpl+RAJYrYHE1opB1J6rV4TFh4qLfYPSgQv8ofdo/6JM0Y
h8fjr7wOTbcT4NkR3jDUKDaoKe0MaB1EtVN1we90VFUl3aGK6baZ0l3joFlUpXVJDkR7w2Pa
ZUH5+/OHQeJqEsgconREmF3Gbr/Uod68ONqdx3TfLN9wPRoV9BMf51KTgxqYFLkFA5s8uYUF
3l614+NCCkvDtTg3NyS86Az+9goJz3ch1Gt9//o+9OXr4659Flo1hIxFwTZWySGixK2Q8QVs
rSNy+51iNZDjFWIiNYZNllkE/cwwaq6pQnUU/FdKADG22xTE2/6CrKaGZiV64DaKUwNNCnVj
d1MDdresDbcy3FSQAjqC+8BEyKvAfUF8gnQr5LtgtcikhgreD89QPGS7Y6icmEQJlg9lJxVB
JeChvv/Ig1RbgXL6imRqAOoj3FdMhT8IvkXKIrlCz4NytjvLbEpj7pBHxHu0wdGK9hRGDJJ7
RQ3ygia22wPk8H/JX4IRbeT6O2SdOVs+qxBN0Kfr6f6iEHOpvmYF1VHw2Xjv2RRpu05wF6gC
atgyP26KFy+R+zZegFyxg1qyCIpnEbIt3Bpwu4NWIAPkgAmQV4Q7S4xAusFyLVgkTOQFLA/j
AfBw2y1OlUQ5amC1pTixvgheAJ9Q+j9ynFoqrHsog9/AuL6BfF9AHoXnBsEHSF8Q5/P9E2gs
IDAYjEGb9b9j4uhZayy9WBgh5D6+j6aAaNuNB3F8tvw9GNGUEu8UqzJVVsAfzTtQc5t6Qf7m
jl7U3LoByI/O+y6YATpQC34O6e4ANkO2t9bK9iF/yvZiv2xivQP/ZfhHFGJqIWy5tbEQHxfC
luen3wQ64RnPB5V9+lZZZrhNgmzv6AF5U2pUGP6pXF4YfCexmvaUYFylWOOqTIVrwe0J6oKR
IAcMA4+rNIKDxuRiYTItAD8E3ekn1l8OxbKHdXlvsMp0L8+iWGu4/azCnJU/2v6Ef6QnVVVY
T8PfVP7ghxLZl3ieRv4MDvPqxPzIC+A8kCpsfqSQUoyUDVkpWYvtoT7sJNhDKewgRZoR1Ee8
c2dA//Zx5IIadwbqfz/oaLuKzkH+AvAdNNy8QhMLw9fIvXwXlQXcdv3cIy8WYDr06AQawV+n
ruw3WsJO00zWmBZp/zZabBwgDv9SdoFmGeNpjvGEPMO200xjDM0UWTSb/UGz2BnEn6EcsMTI
g6wZTTSu09uI87LXaauIpO1sOfVgK1B2Ag1nA4nYE+BlNWvn+cDPbNBtsmO8EXTJYLBYy14E
/QvJFoAcPJP4LDAPLNDyB8Eg3g3hkmAYmKHlT4NhvBrCbcBwLXsFjOdlEa4MorXsTbCMLUN9
XgNvatkx8D2DjcF2gneR9mfYG+VAmo6HTZNX0vgedshVcMwP0c0UBRsm9yP+Y/aU/AnuAcbk
pywu316ZrGwQ1KmBWCa/89sQvlfUnOa3F3wzzSzq67cXfIuUjaDtgO1yd2C+5+elzz+H+y6p
PGru5jvlTTUPY65cI2r4eqp500LbqfnUGkPLzVHymjnK96s9J47Rc2Fp6PgS8oB/LvNt1rpV
z1u+LeICxoiet3xezE3pej6qKrcE5h0+n0L8c4lsg/kuTs8h4+154XN6jH/uexKuy3wPdYBe
Nw/TVPETcfGT7C/WQK8q7qcHhEd+z9+noQItx1difgUYl9VFG3z7itlUU/Sm3qw9dWTtMR7b
y8eAoXQKPy7fFsPlD/wjjOly5OJVkTagE16VN0Si3CV6URPeihLR121FNp53i0jzRWoBmvLF
coT5K+WYH1CKgj2t+1JwfZ6V14hF02EWbUTCPcsayqVol9fRJl/r/hxFLXR/PoI2VDyKPuon
Hwq2Ha2V8jj/N9q/MeJsbHuwo7L1AnaWGSI3OmrJjbqf0a+OuCA7LtTfz8pWDdhe+CbbghTx
C71r7vP3NWzNxqYDNu4smu+Ip8aOIQhXoeesbLTJMNCFQkEfR1eU9aI8YZan+WZJes68C/nV
2KgMG0iNDTX3K5qh3zfKR4PsoSrmYXkE354QXowFG9vGyVD2iwiBTJEl1+jxosaUGiv7wQva
1ojXdlfAjjhIyYCgw59F/fV4EVuprpgD6tFEawTVtRbA/xI9bB6CfVYJ9TtBFTDnZlhPofx6
8rzIpbFIPxbtSFYKnjsUz1TzeDLKU2PrMjXjfamkgp3Xc1COaKvmC8yBQXO4tQxzwxB5yda5
9UA7ew58SM9plzHugGgoP7AayvfNd+VFkYF5rKc9VyViPLTW/vvVPKRtDMwxap6zHiCPXzdj
7rlGI8wfMC6hu8VIug/p7+MnqaNKY80njxhLncx11JlfoC58srzOp8CWEXh2njwkBuM5mJtF
K5T3Kt7NBmP1eQVbTItBNGjJ36WvQSRoLEJpPxtMU0Ec70ObeQ+6C302TY/phnQfc2Ed46X6
6MvdIAscAqPRR9vAQPAFGK/y8AlyBttB2aA/eAxMwrjqD/oC5X+UP4rvoKVcAD3wBc+jn/kA
Ospb0jewAZoDD2QGKO9IpDng9YCLd+wL+SZ8b7PBEjaJPGyS3MkWUghbCHc7pbHt8jDzQO6B
O5ZKsLHyONINRbpvkC4S6b5BOjfSnUFZP4AdoBNoKj6m18QDNB3+ODAbevwkf5xOmtD/5hii
kFZEjrogVbvlrDW0VYH159fmLtplHqFn2Pto8zz5sdgIe7EERaGcMLhlhZtC4d+GuIvQrXnw
txSdMI5KwN75gSrzZVSa/0lhcBm4x6pBrULuw7eVRyUdjTBmG0NvvUkd2Pfo+z/wjPPyK5Ep
9/NT8jDG8kD+AWzZJKotkuVNlFkXtAaheNZx8Ck4jXAGUPWKRPiqGE3pbA3G18to7yfJwf+F
cnMxDvdTe3wP8fxrKsWPUnVVH5DIl0G/LKNwYIIKoCHoBoqDu1A/D+o3AfUz+Hl8X6ko8xQ5
7Pq199cPlMD3l18/KmO7lez6DfHXD2O6DuwHE3bDBowtL41jZ2kyW0fT2HHazJag/8/SXPgX
skNId4BWs7203NhL20AfXkdeQd4QtgHjwiu3s7NyL1uH+fY45u0l8heEj7Dj8id2COkOyEts
rzyLfMLYK1dgXg9B3ig2Uh5lozFeHpH/YkPkDwzzGMuSF9kz8A+X55AuF+leYyNhE47GmHoE
9s0QfB/jaQrLokfYM/APp5HssG8vj4NOnQ6ew3yeYrs95c/mPHCdOmqWUKJ5BnPPSay/HOQx
11Iz+JuZI+VO8xtKDplEyeZ0SnD8iXklj1JBG3us1gXNbFqADBADBDBtksxT0InQa9YGGic6
Ip0B/Y1ylL2h7AA1Z1rJiBso34c90wvf3DwwHWxUWJtojLXJCAm4oRNonhVLj4kBVMP4FrYO
gP+/xKj2n+zfKIL2XJryX+UnADK5G+yCrDnm1DjMqfLv9jysEkUT2JuwKtCUorD3ItppN399
iXmqqfzQdj+yZXDlJ+DjgCxofonj5+TLYBl4DSxRcm1DXpWnbq1p5FbgBZvBGi278RcE1gc3
8ulku+nKtdcClnLFDPkl2r7Jf7B3ogna7yDYiFMKAjsmgipjTrgStL9QPogIJTMHF01gT8DM
LRp7H6Cacu9o3O2gAfwiVWQzKBz0UOtZsww1snlIvA295KcXbKhHscZzYU5rrtaxwWv04HW4
GEHhIsGPtfEWvAx15KG0gZenz/iDtIFtwhpoHq3hE2k3H0hrDC+tgd4YxC7BHYhxswhxKv4V
+kTJlMvDETcD+s5L3/BxmCfL0CHxCv3OPsEcsJr2sQeoHWzR7eAPhjUOqIxvpzyox3cYAmvC
t3hZozSow4vTPl5cfqzWGiDBkEY4SASlQRM20PcTOMxWyYN+jJqgjbEf6+NVyBPMZLkRnODR
vn1s7s1deK4LeeaA13gj31FNWd9BXtz3M5/l+5pX8x33z9sylc+SD4I/iXyHUO8xqu42G2zK
K4z96lkocy4ZcJ9BXeqDVL7IOMQXsWLIv9bmXpt6CtRvFdijniUGyG/hj8Ca8AyfZTQAWB+q
MqALF+F7NOQUYdCn+pR+lTEcLDP2G2VBXbTXRvAFnt0WZTQGXWFvNVb10nzvX9dBXpavxdyx
ykgDfR29Yaf3pu8cvQ2CuxX8AdlS6yv6l3XAqITwenABsq3GRXnduEhVjWPyGsqKoj+JgfrG
DXnBuEGVDUnoI4o3FsiLxgIqBVkU6GhIeRzySAaXSaTrRQ7QykiHLZpOdY0tcLdQhvGh3AzO
wMbcyqsbYXDXAayssUZ636gs7jJ6gHkgAnQC48C7oAl4BLQH0wOu0dd3CO/+Pbik2sJ0Q/cN
g007C3ZdfdgmH1Gm3h//FfKJsAuOUzGsZ7LhJvLVsoX5MNZWWymBdaV+WOfXFf2poaMUTTOT
ZKLWv0Ool1kVa8FxWNMy6HGsW7G+m6zWM+Yo6m02RLk98Q6H5S/45ovxn6iWshlCvqfmIU1g
n9elBHMQ5sYfsD5qiTUM5gXo/GZavxex1xy8/2/W8O/Lq/V0YD7AMxyBslWcoyrqdUKeU+vs
W/OO/FzNO1iPv6r265GvucorpkL3q3VbU7QHnqXqq9fwsKOh9+P1PrU9bxWehzCPdELcONFa
DoBt30iEycawQV8Wz8pLZh+0G9b7sPmqqPUh1meZYgnWFBtgM6k6qTMMjVxQ4NwiTO623U23
5kp5PyhT4JwicC6hkWPAYbxbNN5tUuDMATbnUt5PnrVpBZqrdWmAW+cN8gr47rb3S7bXqwXO
EuRa++zgYNA5wif+8wP5G+gMGplN5TdgFTiU34/v0TzQrcA5gX1WEHQu0JbPodoYi7FY33fH
M6PMfniXXVjjnZEn1fjFGL0OW7WhmIy2bErRoivm5TftPd/G1E3v4faAvI38Ue1dsqmwv36S
b6u9SHORf3+RN8J8d07vD/YRZamc3ls7i7XlaLkG7ZTnGIhv4Xes91qiHigXc8v99tx++57e
DawNgvaqUf48vSbFswP2AF8pX1ZrT1Wu3rdt4i832LbAMz7S+7B2nsDeZ/5zUIbO9zHyVaP6
qs6B/IX3U5WtwBbLPeJHrCEPyAvWY6gbwHp9BHSLod93PI2C/bKVZcoRCtGMEtkNrA98VInP
pXXK1ucxsLmryGv8CGzO9TRRrUvtekeDUnjXcWp9bNtNV8BA29/rls0ku4Eqgf11Na/nt0ET
rCm0Kx8EDxlXfWX8yMH+fWd5GXSH7DebrqCJXosPL7D3XBb5HwWZt+0t2/vJ/vb0nbP5zt5H
fjJoT3mq3jfeIx9me3w7wDqU1xPUAu6gPdxifIf8usDebWD/Nn+v1ndR1Qdl7dFplO2m9rPV
3vQcNV7kO4irIcagHV14zxbIc4mq8A5Y55yTh3lnijEXQmdfoRS9n1Mda4D1JERN1GEFdFUX
La8J262SaEPRfAH63C2T9LlVbarFxlFv2HPHhUlx1hzqItbLBGXDWXfDXnsP6zm1LzQC+dR+
3xFqpfZwxE9+W45fgy5X5zS5sDlzsX55ksId+6l+CGws80noiz8pAfNknGM+9AFsSzyno7YZ
izonsu1PfXYXOFcz7b0kwHPljUDZKs5ah3XPy/KcPgfLt13lSvWeLMK3Dc/qinyldP4o+YY+
41pBXNcb9dX7VB9ivrHwfmov1LZ9C5+dQc/XQdwivh5rzTz5LZ8gp/H6NAF9tkuskFLEQafN
lsP0Xtga6KEojI99WFur9Xd9eZbVhZ1qgZXUVO3H6Lo2QZkaOarAeeRcOdV2x92yw2Ukn+37
o8D5Y+C8UYM8L8jFeOe71b5c4CxRmHKi/zwR4zlPlmd5vmtqfy7ArXNEuREsuu29/eeE8QXP
COWsQmeEweeDAN/uBN91tMsiMBLMDzoHvDf4LFDv+wXOAG+d91XDu6xEOVKlQdxYPW7yYPN0
kxGoTw3Uo6JZB3Vpg/rNQR6MdYzn6yIU7TmiiPM3xZiC4dvO3orgTs5/7uTMx/JSeMhV6LH9
WEe8Df9l+EfcOcFrkL+jQPrOeM7zCA+3OeN3VZwZboP1jaPH3zx7zH9WB6zDkmx9H+s/f5U/
8Um2vu+M+eRbrL3OQVeFQIdlwoZX+673gYYYo13kcNHJPqfsBP31NQ3lB6kbwkqXRitYDuYp
RXvYy5j7oIeb8CaUhDWXQ7yl9fv9NmqOqKd1/SDMq4nUwtwB3qAmav8fc9w+zZeao+AaW0BO
Np968tOo22lVtjxinJNxrLV0G+cojC2T0dD3pdk2aiOWUUV85ymiFd0H3X7avCIv8F3yNN9A
w3gTeZ5/AzD/8relV9l4YAF/XF7hHnKY8dSdX4a91xh6qTvskgdgcyyXMfwreYwnUHXRBe/+
OEWpPNbrmIfPUaKjGyWapakXdEgfcx71sjpjbJ7AXLUd30J9asZ/lz6Ud5+mulxrjpVTtW0R
A52s9Hc/6LR+aO9MqqPOyzBfHmDD5Gf8GHT/dSnNd+VlMRrt9CZ0+3uwz3PRX0+jvWpQC+tJ
tMcWqoY+aQPu5f/GN3caNtEVuD1gWz8F228EhZg/U0l8tydEMRptNcecMFye4r3xbd4LG+G0
3IF1Vzxssg3iQaqFMmqZy+lh0V5+pNbUogK11Ovq6vRS/rp6E8r4p3X1TNiCam19jd7Q62u1
trbX1XpN/SFNw5r6WXV2Cb0zTZ9/2mefbDN4CDbKMBqtzkCN8dRLnX0WOPdsjLgT9CqYrc5A
8889/00T0Z76/JO9QfexP+QNNok2sqM0j39Jm9hOamCMl0cYwc6+IK8inYE0KWySvMnOytf5
l1KynXKiNRh6fxdNE3vwbcTLtxwPy+tmuryKtcAo3hd91wL8Bps5nhx8JPqlKWxUFy3kx+Re
azFsj6FUji2hciJbThTHqLz4GihbaylshzexNlmOb+lBjK828ltrF76FZ9V3qWwbzGGvYY4a
KuPUGbO4B/ZIOuzDzVTaxFjDesxvZw7R3+hnsDVi2Bh8E73kPnwT6WIj7Jpn5Fdoh6msGS1i
w+kl9iMtVG2pzpSNHXhf/7nyO/hOJxjr6E2071zjTxrP4ukuYxvNMNbTUNaW5qMdZ6u25HdT
KTATLGKXaSnfhPKaUQ4LpSqsDL3NO9GTvC6t0P1yHOygjogfzpaCfTSYvUrteXn0yQX03Xl6
Rp1lq/Nq4wr6tTjYgOeos+oVNNPYRE/wFHri1rmHYWD9e03tE7CF9AvYG9hrFR2g0zrQcb0X
o86xB+o9GRev5jvFBvp+YYN837Gm9KICZTwBJrNV9Hgh6oP5YKM6W1dn6PrMXD0nArqhEOL+
gkCWAvevqFMYpFduTGEgvwvubUCeDLcoCtfjr9Il/009ipLHwr2N/7Yef1OuC+5t/E39OsAt
ijutx1+1czTc2/ibenSGWxQF6oFx1U/BG/m+EYuMUHV2h3ALmylgBpsrP2UDZV987334zzKH
z/IdZg1pC+L+BOfBHOAWSbKzgjPMrdWJNNH+PUJHafoU9GK/yVNsm7zAzshLmLteh/974wjm
lSDUmXowRDdfUvCaKC+YaJu/kl8qRECu7nmUxbP8e57hOhxM2UIUKofVIxNE6L0LdR/0PvRR
wK1DM8RFacJN1Xsog6HvH6Sq5geYrz+D3V8fc1YybPT76QH+HNbuz8kz+t7CIXnT+ghxzaCT
E7EmVWfB2VgP+90X1P0DPkN+q+wcvlf+KM5hrXmAxvE20NdY74susqI4Dj2/H7a3/56i8Lvy
edi2Q0XozTxl4+o1wCeUA/vhHjMDNsBo1M+h9xbixBG5TBzx9QF1wXmEl8L1gHp2OBXUKHTW
sgBxvcG94KId7mWXccVaLreDZdZyXx9QF5xHeClcD6inwvxX3zb+683HwCPwbw/y9wPpZnHf
B2bxm+PAI/CXAdvhH2uHK4B+IMO+E/M25ENANvxhdvhBO1zcwvxq7fRtdXzkGw2GOh7zfV44
zO727WZ335wKHoU/qojwIOBhd8sMMN70+H4zPTc3gqnwn4G7CTwO/wLQXyT71D2b/qLGzRIg
DnwIrkNmihrUG0xW923MUTffAKPgrwdOwr/KDtcHz4O+9t2cU1aiLxM0gr82OAR/Nmigwo5U
ec2R6vs1JMI3EXR1fOZ7D+EL8E8OhPPv1fw/Erij81fk39u5I+S1/wTY+WGsvXwKTANDEQ61
w4ohIIK19/0GNxP8DiaAmmAwGPSP9wjVfSFFwXtCRREGihWStQr4A/eI/j/4T8/u7hSrOCj/
9xS491wEBfcg/nus9sDz99j3jp4Ho8DTCEfDfcYOTwJRIFrfc4mA7Rgh1d2tZDAATPyne9KB
PQ+1J6F0Ltxxttsd7hC4/e1wIH647baG2xauuneTHhTfz3arwU3Se0mh1AVuEtxu/jty/zus
BeDlv8fW+c9Bt7ttHX/WDnsCYVsPb7VK+kaDoeZe3+e3hQvqsa7wJ4ELwXrMnjuewxzhtueO
s3bYkx++A31u68NT0H2ZWv+l+ZJsfZgNGsBfu7DtwRcVsieC/UH2hMoTsBmUXWD8Tn0CmDOI
xDPUU9+5nI91+whq5LjLf79PXMI3sB4sp/vN2jRXnT2YX1FDhxtuO+qj7+5doXn2XYLusA/2
WibCn2LdM0vTwKpJGQp1P1DdGxSrqZHplhvR/g3NB2BvqHt9XW6dTalzLfV3KWZj8igCdw31
WVTgvmHwuYy6/+e/N+hnFmVjXddA3Q/kI8gQe+1zlWEUaj1NlS2CTdmInnNEyI2OsqhDaei3
MjRHnfeZqXKjGI92uol3U+ciFtaliynWWm3foesAHd8cVKA2YibsoFnw/0Yx5iW407DGhx2k
9mb4F/iOvqB7BNN34ToLJ3XEejNdWFinHIcNc5zqqXt5QtnzY+UHIgPy57F+OUkdzbPyomor
rHMpcIbCz8k85I9SBO7z2ecfgXMX/z09wCfLXwvcmT5JNdUdQX33zsJ62+ffn9dl18I7P0z9
+XYaYNWVH1idYa93oZbiSeqg9q/EcNTtCnSXup94Q9+fJIyTeKuifV+yCdUWA0EIWAk9coDi
zKaIn0W1tK5Rtp3aM/XfeRggesq9ZhcaJXJgz9UDvdHPsBUVSu+pe5j6rtUquUb/3ccJdReS
Jlrzb+1/q71zrZvbqDMtirbvbnK93x24vxm4m6nsTHWv8iDG9kGqpe5lorxUdQ9U3bvkUfKy
6IW2UPu0lSjSzANTaCb6dybG4RprJMrajTXDU/SwOlMQ81AvWPohIOCyd4D6+60ekHWFuw0s
1H/+Zf/IoyBGlFB3k9GGR+R17rt5L2x6A3buab1Wr0mPirVgHS3Gmvw9NodCzCiaJXpCt6pv
bKM8hbzF1dgyp1Gsozc1tCKpnmMh1bSqYJ5W59ZXaFTIOaoqHpOvivcoDbrSLa7LY6I6+iKB
MtW9PCuKepnj6IS5hE7o+3mGutdH94p045BIpw8EySuCjPf9BPzyiqMUPS4eoCfUc1CP6mKF
3G2m4ttz4Pt8nHphLLUTteVrvDeF8/3SK7pRT94M/VKdloDp4F3W3egAerDuaK/uVJutkufA
dfEjZTsuUQXHMXnV8aL82TGPEvBuDc2Gcr2jLsbGV3KP40283x/yJXXvW/wi80J2UYa5hTKR
llR6fEeZ5g6aaHL1HcmNVhd8k0zusbbimxogX1J3odX9VMcrGDdejPveRCo9b4TvdRd1Mj/X
ZwyroTPizHT5o3WZ4vgCuUrf8e5Jz4akU7pZnbqqtIr/Y99M4KOqzgV+7r2zz509s2QmsySz
ZJJJZpKZkJAEkkuAkIRAQsiwCiEskmAgMQsCGsGttbaKZWmtda24YFxgUAxKC1aEutBqi1pR
FK27TaUutYXMzPvufBMkaW2p77Wvv/cm4T//c889M3Pvd75zzr1hJpHXRxL3pUMQDyH2cWwW
/x0+ej7RUEeg/zfAnMLG3pHdQd4TvES20C+Rq3igHAF38fX/CLifvBAS6Ay89gTwH/hsSsz5
N59zn+gavU3POWcd+Cne1wobaQG9Mf4M46LUzM1UGbQ5DOuHA16uBWijr058npycD2N/zj0e
iMNxgZ7KZ1higO238dgomqmh5Mw0YAuUAbqP3MO0U3nQ/mPgLeCW5Dh5HbcTQ0si3AZr7rZY
D/BnQSD6HvAl3LPOAdr+6lovyV9dbyVhno1/ipAZo64nzrlugHgvATYBsCpGH+c/Kw9Axg6P
B1YCZqAIKARagUlAPwBRH/72Oeb3L4fXuBzIRGLPg3eCK5DEewHDcSQ6nOQ6JLY1yS1INIDE
ViKJdoExyIAqSBn+vVjgSnjt54Anoe5p4BhwALZfBO8A3gUgr86chLoyJLoZ20dD4KPwXmuT
vIREh5DEc/jjLk9+notnLzL8QpJc2B4Hz3sgyZNI9EASiG90CtABbQ/DvruR6Aiwb/ghqNuM
nF4H7/sYEAUeBD6DOojpmePQDvL5DMy+wzAdn74X2i8E7gSWAvcBcDxxA7gJuAmA2MfuAdYD
cCyxdgBm81g9ADNLlD93XfI13sc2cRjrsauAZwBYoWMbzzmXEV5L5s/Tye/P8Pk0AHwAXATA
sUT7Mb/OGvIkdgMyzH+e7K4xtCbpSMYqGd9oxhhkSRRJLMjwcJKdSe5P8ikSFQP859NuTr6f
PPmZNksyj3yABzABMG6HoW+Gtya/kwSxjlYkuQO4FXg1Gdu3zzlnGBPREkEgVgH3BRRAA0v4
z4kyz8VrR31fL/ldQJgDH/nfBK7JSvnPdpMZ8b/sljKD9F0RS5F9kP5xxDwOdAOqO5JeAroY
1YW6IGIqBS1ELUA5I8ZyUBYqE+VA2VE2lBWVgUpHWVAmlDFiqLYPUm+hTqLeRL2BOoF6HfUa
6jjqVdRvUa+gXkb9BvUS6hjq16gXUS+gfok6inoe9RzqWdQzqF+gjqAOow6hnkL9HPUk6vGI
ntevIvowaB9qEPUYam9Evxz0KOoR1B5UBPV0QkxRxJ4PCqGCqEJUASqQ6FvGj1uKiC0AkidE
n4lYC0CnUX9GfYn6E+oL1Oeoz1Cfoo5HMkKgV1G/Rb2Cegl1DPUb1D48FhbT7THUr1Evovai
HkENYir+BHUn6g7Uo6jbUC+jbkHdjtn6PdT1qO9ggn0Lt65BdWIKfxf1bdRqVAfqItQqfHoY
NR81DzUXNQd1HWo2ahbqVtRM1LWoRlQDagaqPiFGhVt1qOkoQyKJaD1qDaoJlYbSobQoDUqN
UqGUKAWKRclRMlQzSopJexCz7gBmnQ1zyYrKQFlQ6SgTSoDpxmC6vY9p8x7qXdQ7qCOYIYdR
T6MOYRY8hXoQ9QBqAHPJjB1ejOEZh1qWOGrGgAehR6WhdCgtSoNSoyg8XIKHG0dFUcOot/Fw
30KdRL2JegN1AvU66jXUz/GMnkQdRB1A/Qz1U9R+1BOox1E78aTvQ92Lugd1N2oH6ncYkO2o
bajvozajtmLqb0FtQK1HrUNdgroRtRbVh+pF9aCW4uhoQS1GLUK1ooqwV0KoIKoQVYBaggqg
/Kh8lA+Vi8pBeVBulAvlRWXjAKIxhfMwhf+E+hz1GepT1B9Rp1CfoP6AGkL9HvUx6iPUh6gP
UO+j3kO9i/oC9Q7qd6i3MT/zMevyUD5ULioH5UVlo9woJyoLlYmyo2SYwlKUBCVGiTCF/4gZ
eQr1CeoPqCHU71EfoT5EfYD6FWbkL1Efo15AHUU9j6n4LOoZ1C9wwHpwK4KpuAv1MOoh1M2o
H6FuQj2Huj8hRojJ9wPUVahNqCtQG1GXo1ZgKu5BtaPaMF8uRC1H7UZNRdWgqlCTUByqEnU1
6krUD1ETUBWoclQZqhRVi5qGqkaNR5WgJJjCYtRElAglRAlQDCqZ8xRqCmoyiqAuxRyMo2JY
uRK3oqhh1BnUadRfUH9G/QxXhJ+i9qOeQO2OpH0XtCshuh874LKEKBt3RF1l/1JZY/8T8IWi
zv428BZwkp1pfxo4BDwF/Bx4EjgIHJDPsf8MeATYA0SA3cAu4GHgIeBB4AFgALgf2AncB9wL
3APcDewA7gLulLXZ7wBuB24DbgVuAX4M3Az8CLgJ+CHwA2C79BL794Ebgc3ADcA+ZjbTyMnm
2K+Hje9JV9gnSZkmppG0ETszC039JKILwknfibojouVDcDvq+6gbIxoOtBl1A+p61PdQ30Vd
h/oO6lrUt1EzUTMiENxBqh41HVWHqkXVoKahqlFTUVMiqqmgyagqlBWVgbKgzKh0lCkCfTlI
GVEGlB6VhtKhtBHo6UFKw80Ffw58BnwK/BE4BXwC/AF6/E3gDeAE8DrwGnAceBV677fAT4H9
wOPAPuAn0EvboCMGqR9hsG9CtWNg2lArUReiVqCWo5ahlqJaUUtQ41BFGKYQKogqRBWgAig/
Kh/jk4cSo0QoIa99TAMzM1JuLzrAzCRTgGaAiR+Eypy86n2JgtZQPUg9GNGlwZMeiOgsoAHU
/RGdE7QTdR/qXjzxe1B3o3ag7kL9EPUD1HbUNszHragtqBbUYjz/RagLUAtRC1DzUfNQc1Fz
UGFUM2o2qgk1C9WIakD5ULkYxRyUF5WN8qDcKBfKicpCZWKgHSg7SoBiUDSKQhHuKsjSOBAD
osAwcAY4DWn5F+DPwO+Bj4GPgA+BD4D3gfcgPd8F3gF+B/wK+CVwFHgeeA54FngG+AVwBDgM
DAKPQQrvBR4FBqmHsUceQt2GuhV1C/bIj1E3o76Fuiai8YOuxuhdhboSdQVqE2oj6nJUP+oy
1KWoDaj1qHWoS1BrUX2oXlQPqht1MaoL1Ylag1qN6kBNQnHYaZWoCtRE1ARUOaoMVYoajyrB
LixGqVEqlBKlQLEoOc5IMpQUJeEC4CHokVeAl4GXgGPAb4BfAy8CL0AvbYXJZktiwrkIg7+K
WwPncQ3jtl/N+O1XUX77lTWbwlcMbApvrOkPXz7QH5b3l/dP72fk/RbQpf0D/a/1iy6r2RC+
dGBDWLAhbQMtW19zSXjdwCVh+SUUu7amL9zc907f531MWl9z3/K+3r5tfcegQryj75G+Q33M
YPwgp+0bX169qe/GPjoN9tOkj1Lx1Y4+ubK6t6Y73DPQHRZ0u7qbu5nSU90UzXVTS7q7umlo
tKfb5a3mG1u6DeZqRzfX3djNXFzTGe4a6AyvqVkd/mQ1pZ4kY8LEAbwAMETFNJPNTDMXp0lH
VwctXQVn2+5fGW4bWBm+0L88vGJgeXiZf2m41b8k3OJfFF48sCh8gX9BeOHAgvB8/7zwXGg/
x98cDg80h2f7Z4WbBmaFG/wzwzOhfoZ/erh+YHq4zl8Trh2oCTfWUNP81eGpTLEdVlJig39d
tk22UzaBfIm1y0p3WU9aT1mZroxTGfRGC6UybzRvNjMqeKDxId2evjn99vSH04WqRIFhu7Sb
tHSXZpOGLtBwmhc0JzUCorlDQ6s2q25XPaxiGlQtqk9UcZXgYRX1sPKA8ldKpkHZouxUMiol
v82oOaW/sFql4KbbFQEFMyGgqFQ0KJjNCopT+IPVnMKVXV3JNrAtLHM7S3GsJ6f6E1lcRnMy
2MFJPfnwYLRUE4ZyUBSh1CBGwvcFpbfDJE/2GCghBdcEu5tn+3zTB8Xxpum7JI0Ld1HX7nLP
5h+5WQt2ia7dRcILFs7bTVE3zN9N0ZObd6VNn7UAt6+5/npSZZ2+yzp73q47rPOn79oEBY4v
xKFArLsNpGq+b3FPX4/P5+vx9fTCY+/iHqjp7YN/CVHwCO7r5ff09hC+4d/+4XfjC/l6+lrg
2Ym6Hv51+3z8Fg//Hv/hP/9pR0j9x0fs//KPqWUx4f/3M9bDnBQqYdoTk3ISJnNIw6P5hnyD
ZMIkGV1GaomY2kVo4qD5/9ajqN2cVkC7S0TMLItC0zWLmjVFTDeTyhNvnFj0xomj4KNU4MTQ
y0Pq6MtD2tLSQKCwgNJkahKkKWmxWCRyZvnpkpLi4lAoWEGPK/LTziwl4BlXVEGXVDChoI1O
NMWWiVpozNcyJ4cbmOqoi17rmNJWY2Py3Qa7VkylC51meaDKq1VYA05PWY5ZJBELRDKxJLuk
KmvqyilZsecEEqVU6XNkOHUigVQlV+RkmrN04phHqDz9qVB5Zq5gypn9jKZ4xcyQaL1CTgul
knszLbaCclua26pRqBRKpTjDniEWa1Uy58RZ0dukGQ6rTKGUqvWs3Gq3yZSsRGWIZhI6fjB+
WnCRMI1kEQ8ZfJypZqaReT5+/grP2+NmXQq4gecURo9c5jQZs4jLZZTxf0IgRjes/5yVc2aZ
GHhlYhR4VaydpRUMy2qtTdqwMOz1mSorK7WlAdKyeJHPWKo1lppnDFGBYxDo9IC2VFsagoib
1EOa0tLCAss+4v5mr1hYMN9t4HvET2czmWIlA33jKS6hsGuMYieVKbhQSFkqij0FZhnljJm/
JdZmlfr8IY1CR/fK0tyVofKpHpY+ScXepDqWunL1QkaiVlKCmFInE4iMuU7BZRq9nGHkBt3h
6HH+4xYTCBE4IAvzyXWjY8appXqDxGCQeLPNCrOCZEvhAmmv15et12dK+Msp3ywDaA+X2cyf
DRx+JYQjAMGAyBziE1B9NBhS93/70KFETKTn+2yIAmShwJnJZAYN+jElPoN1kJSZQYGDEclU
ejYW5KhrlSy/kcbG1tdRx1iWFsOGIrpWbdaIBG9LizPpq82CD0Q2tzfTEDuUphVb3R5HWmyr
Pk1sc3sy06R6u0HQlpcN8SiKnxbaIYsC5OCYeBidrCJLkWUyKowuucwdcBOZMbfJ5YQLW87O
yU3uQJbAapQRRbK72b/b3YfMM6KHKqnAC8GDQT5GGipkUh8OjsRrz3/3lflc4hOIj1cmM1LC
TBIzmSMlgZdWO4o8nqBFxrTFMtpodWbIk12YIWO+oHBHhpRuod5dTJ/dcsrUMqEQHmg2+vlI
WfCLkVLMRb0+UobpqyL+oSCdeQXGZDnZ/jhTw9R+NSqlVoltkPY94sn2lEv4P8QST+EgvZNj
ddLybKvAQ5jM2lz+9s5cVwy3d49yyhlMfeKME/kCp11qLKUCQ8dODIU0oZHhx8n/iWfzYRqZ
GDFIMO0JQkGDMTn1iSmPB6ZJgT7NRvPTZgmzXFAy0Z5tEtMZqqoFq8saV3EWU3Dm6uvnz95U
oIZ9Nq9RQsdedIbH51YX51gUUpPXnndB40Rlpl7LT4GbHdPKPONbNkyu3L7tO6sqp1Y16LVC
qUoW+7ykxDt5Xktrjq04N33cwvVT+fFZHv+IWcC8TMaRi0dH79GMDKLxFj1BOWEtkcHda6DO
8QTlIukkjWrcw7ln4LiKHhuqBKjA0UOlsCRY9pOi83sGDsPEZITnb+BPP5QYiCJcNCBONgGz
QK61qFUZORWFRU0TvWb5tPrxjaU5GplUotBYyurnFwzcbyyave62ld56rtAkZpYZy4qcJlu6
v3ZRy1zHrGarM0Or0YSK8s2ZZvWDOydu2XrdKo7VZxi1/EfEyuMfMs9A/vhhpnp0dAT25gZL
RAIiHaS3clKnhrUxaWnOwCC9mcsmTo2GDX6UW3LYS0RqESdqFC0R7RIdFIktjEhky61j45xt
xsjMMzJ8hvgUCvDLKNQYS2HLmEgo9zd/sZEoOkWiURGkxedmG6RZEZ9ltJhvwTwz6Tu/2XKB
QNC8qKq9oYhlZSK5Rs5yC7rKlmxeUpA+fl7/jvaFVzXnfFk5IdgwwadobuyostHHa3pm5xnz
dbOadEadUqXJ83lkrClN4W3aOHfyj7Zfu7LCN23hZO8418TZAb2rkFDxuthWhhOug2uP28eM
TK1NY3+CXgdjVgPh1NROqOFqy7lag6GWKxeQXHaQ8uyZOc02YZDy7i23u7Q1NcV8FedqGAnD
IRheMA3xa4ER1oJAQAMV6qGv1kj2vF9iZEHATIQrmVByNXAm5jWYPUaSEUeobiQ7Q8mLGqPB
wHCMUCJXSkQ6k13rCGSZJKqfqFhGwip18h23asoXXDqzqFomFDAiqVwpFUG1im8l/WEXq2DE
MrVOsUanrlh46UxzUa5DJBIKi0SWLJddJxKLtNkVvnqdXuZwu2y64VOzLw/71BKRUiHKyIQK
mqF13sp8+pTGJHO43FbdsuZNc3xCKSsSJvLbEz9N5wlnEh3JIatG98IjOfY0GxlkKE4us9ts
afYcgStdNUht3yvkXLXpybnsjRlDGi0/DcLliAamQQjuY/+gLR/Q5IqQvOobsz7QbrHJW+bL
HWcRSEZKTOxLWmUPutwBi4TeDcVCd6IoeNYdsisU9pDbFXQolY7gmSKZip/+VTJmg0wlF4nk
Khk/k/Fn6hN2ET2ZNvo8ObWeyDkZkenlAqG6WogHmzgn89FQMDGl//XOcxa45AWSmHLSKlvQ
5QmYpTQlppUO/hDNEjpr5ICEsHbxBwQrU+J4mPdhZikjG8YcD1toNls8jEqgdKv0g9Q8Lo0r
rhMoLW6zqtAjcfhqHfXS+uTKayytTFwLBg4FNSE42kQH7CP683lWIrFF4rOrc3HxuOQ0MHbB
FqOZ96XizmTo4Rw7hEJPfs78hgrFrK+6Zg+tsPhs9myDmLbqqxdeVFbdUm6mX3FWu6OvjsSB
NpqCuvyyovmXTI51nO2tfplKKuRXoq3O2jJ3TvUiPj8nwPpNIEpGuCKaOzpOB2D/48REXPDI
EiuVFdHV5QxSzj2c+OxsOMQvz0OJkHxNg3NG98goFhaNrDmJES0QEEvZwo07Vq7YurTgq1Js
WJM9MS/YWOm3Kb8q0d01N31/Y+v4wMJr5tTcdOMVS/jSytxJ+absqrlLluXnVkFp8tzWpckM
YOHcQmT9mAzQeTUaqzaDWDP4C64Ay8C1+yDVwqm5/DpthsZrzRYZs2qNZ5ORPxV+1ufzgB+E
ySxg/8FTxs5sX9PtRgPDCiSsSieXag1mTdaM6hK28asej9DKkR7PMFVOq3er7Ba9SMQ8IHYV
hPLg3klcFL64Itb51x19g69mnE0gkgpFEA0aVloxRKOaXDU6GvuJil4PS0ERvZ3TGcrhlzhV
RZxl6vtC2YdcnWOQIntzA3/hLKMvIPgJf+ROAOZ9fhiz5/m00dceNOSBQJ/cHjPZw12sgL9R
TYZJLFbqWIUzODnfWeLShern1QfLOm9fXjB3agErETNiKauUKLOKG8pzJnp1hXVz6wqL27Yt
zm2oDMjkzCVsoMCpM2q19lyTPdftnTBnUv0Vi8cp08xyiVYpzcjKytCYrOm6rLx0Z57HWzZn
0rQNC0NyrUGemN8Wx39PvyvYTaaOvc7lrMV5vhJflUQ6STqpROrzFZQYS4ykoKqmZNIESR4s
gI9KfZnFNTBdN8EN0TlXEqVDwaOlpXCXcJSPoraUT6zEHYIa7xL2nvdLjGSak/n6C5GzKyd9
duVMrLVwVmI++Z5qZoSeHFNWulYikUsUaqnUVTg+Y8LCCjstFDJzOxSsWG3WXuRNTFCuApig
vE9qWGa7zO5yWXWxRaochdctlopVGl1BvlsqVbPi9OLmCXKrI1NB7dGYNCXjPEdgghYKYYI+
YuBjugZG6LvMYVJI5oyO6T6SSedGtAbvE/ROQoiD3sLJOUN+bZbCUqtIjjE+cBCEY0PqE4ns
k47dnZx/lUwyBtmMx3M2mXR6iEEyDMy7IpF7QUd/rSzDW+wq4bJYqp2ipZaQz+tPl1D1wtDs
aRU2hr93cgfSpczdcoe249Vjz7coNVJayOrVTJY6g03TK0QCmYaNXpwunXHLjl1LFXDfBOMa
rsSOwHkeh/MMjF2L9hMnvQOu0OX0fk5BERdrElDp8Gt0P0FvgeYK+gCn5Iy5tS5Wa6vV1otG
VpjS5NkH8I9BWmPp2UH4NxvzsdCd/eMDc/ZvD4xnJB6JSclgEInpbXcIRfYyfy7fxR1vi1TO
0gJfkYmRU7O3iwSW0kAOH4O2V0RKW0GOv8TMKKhTsSkag1LI/zGIKo8dkiokAqFCr6H2U7do
jUohI1LIYi9TuRJWIhCwei2sO3Pin9EM8zBcF2WTAn6lGSYykkZHiY04qXsi6fVC/r8iVTXe
kXj5Kr9abUZf3TCjr3VOS9Kzy7w5ITMthVJpjrfITH9Xku5N1FESiQnqcorSGcaQO96lVrvG
5+aW8y6P1uaWOtVwtr7cMr6ijM/QcfHPqFWUF9ZH+35CGD2shDpqZ0Rcf+6BwWEVFrjHrHLU
KpFCb58YdBdaWbFC7ygryobb68OqglDArmNN7nR1Qchv1ynT3We/NUA1job+1r8W5gf/PQTv
pUiR4n8akeebIf6GSK48P2Si/4Oc+p9BvunrYe/5ehRXfnOUN45G9cL5oXH9Z6Jl/zY6W4oU
KVKkSPENOUxImj9FihQpUqRIkSJFihQpUqRIkSJFihQpUqRIkSJFihQpUqRIkSJFihQpUqRI
kSJFihQpUqRI8f8NQhMq8cXtNMLwJdpGRLQs8U1u8q/8YeZ9Tf3cUZuCpDMSj3n/7LtQNKAG
bJQ3sb0o8dgJrKX6E+XvUTdSN4MPAodJ6md09O+DRw9xQElE/KSMTCJTSQ1pJcvICnIhaScd
ZA3pJN2kh/SStWRdPA7tz6sdk8tY40/FX4m/Q+4kD5J95Ofkc4qhJJSSMlNWykPVUTP/iRRk
CIn/8e+2UJKHsB38LB95DhHD0Sw/+z5BcjxZZkg6xSbLAii7k2URlCuSZTEpp+byo0Yg5V+T
2pIsUySD+lOyTBMlrU2WGRKkHcmyAMpNybIIylcny3A89F6yEyIeJAWkEB4dZAbEbxnErhOi
1wnR7IW6yYlodiUeW6GmHUprIPIOiHwH/DpIE9StJG2wryextQK8Alqvhcfl0HIyPK8D2iyF
unZo0Z5o1wr0Jl5zObRbDe4mF0Ed/778njao/dtHtDKx3QfHNNJ6GXg1bLfCkbUn3t+/0xEs
KAw6ZrQv6+7s6byw1zG5s7urs7u1t71zjd8xqaPD0dS+sq23x9G0omdF99oVy/3TZ1bXTKnz
TW7taF/a3Z5f1dmxvLYXNpb98zuSNY72Hkero7e7dfmK1a3dFzk6L3T0tq0455hWdnf2dfHV
yzpXd7WuaV/R4/+39Mh0MpNUw6iZQuqIb0z/8K1XQnQ7Ej3y91rmkyp45w54xVp4J9yz7N/y
jP+VjMKFStVBOYiavAXjhwYHyBJCFGlGI4wzKjFahYNNx+96ck+LasIXJF2SGL5PfHzZ87yf
O77vzdProtfLbOL9sCkdWRH/S4ABAEAZvwkNCmVuZHN0cmVhbQ1lbmRvYmoNMSAwIG9iag08
PC9Db250ZW50cyAyIDAgUi9Dcm9wQm94WzAgMCA2MTIgNzkyXS9NZWRpYUJveFswIDAgNjEy
IDc5Ml0vUGFyZW50IDc2NyAwIFIvUmVzb3VyY2VzIDU4NyAwIFIvUm90YXRlIDAvVHlwZS9Q
YWdlPj4NZW5kb2JqDTIgMCBvYmoNPDwvRmlsdGVyL0ZsYXRlRGVjb2RlL0xlbmd0aCA0MjU3
Pj5zdHJlYW0NCmje7Fttc9vGEf6uX8FvPcyUCO79Lsl0hmUaNm+O49BpZjwdD0XCEhuKZEmq
Hudn9Bd39w4EwTtQACgqtpNalkQS0GFvd++5Z1/uk9GPtHezvfrr+OqT8Zj1aG/85opmqTW9
DL78K8ZFKkxPslSI3vjuKuvdwPd4ij/eXr0iP96v16vNbr5M+pLcJP8cf42DUT8Y/KkwFMYa
f3H1eZZl/C/jf1WelTIm/MUULmoclXy1fLPa3E1289Uy8TeXYxmeqfJ26m53g2Zcs5rBtbTF
7X0cXuL9r8jzpG9SSSY3eSArSzPOjP+DrBz7lMCEHUuXysyweKLcX+0znRomaa9P3RDBXdLf
lfUUTTNNS5Gp08h4cr3Ii6eJvaxMc3ZCVlmjXOaH+pGlxwOBOJKKEwOpciArD2biXo/fL+Y3
q+X9dJGvdnOwfcrILKEpJaVei7kr8AGmWj+CrDfzu3yzTY4UyFMqWI0jqTpHMl7C+22e9MED
Qa5jiWhqhWw/aTJfHgsDniU6yUJ2t/NgQhQWleKNMhxGot6C29397F0ajJWlGdsvWXgFyyRV
qqczm0rl12z9A/qMp4Ja1uvD6ral34FD4KOeO0McP4qlmmeyUWwtDwtvP9pkvglVIJWxhwnK
w4KOxuSpEkpXBvVjDl9EQ9qTa7hePNCXx4XNapYI8OL76S6R4DWfJH0Ob7+ADzk4NXyynW7m
awdM6E+Ux3N8vMZKIARkzf99nycaZFiCQJRME0APRfKte7xCVEabuxdcS/wF+kylKU1OJijL
38ZXChyip6xIwR+FAWP3UqEtoPsmv3qD+B+6kGY9pTL0IhirXPXkOf00VDizXHSanfKz+/t/
Vq9hcopkMsFFarJglYqUUt5gS4AdxYV2sErR170nuUeQb9bLr0JpDctEJ/cQwov75T+SviY0
QhIjs4ZVDF5kLOwNICOHzfQIRslz9jEotNiaf75d1Si0BYrRyrZtvbQvfkrAcWsUqqgyFfU/
BAoCNl3bA16gBTtSBslSGalVWdlFUM8XyC/XAfZbwzrNt6Ad36xhDVsCHhl5UBeXRME81uxW
gWBGdrPEJY1aTPKLZ2BUTgbxHLnhZ6Hym80E9GaAWMJORe7y5S4Ym6damAbD9ilsHzAnz76o
8+pXZLrabPLtGtDccYT58iYYWlZU2qzNU1ZRrOPM/UCb/ObAgMutpHl369tUK/DdygIm9+vt
bpNP7kJKZWwdZX1QrNWbcH6nXYXVem/hKstpYsFVtqWvqNJXLKuuMPLn4IlAWGUbo1SkBiY4
C30cUJZ2M4znHBCdhENRbVWTB2apAVc49sCbfJlvMNJxULiM4FpwSp/QPg/B3hdfjSK+avXR
QBB0BQMBzxEViTwULybX+SJUP+sMo9S7zXqTGNDV6jqMMpgnso04QDk92t0ea9laJwHutrp3
vHGX9CHYvM03yxi3uJLn7PPXiwQD2NVuF0MWzE9p3UlixjxTXEYrRMKW2ezWjq7U8S8w1teD
79yGQK1j1DRmJMzahs0PHiEh8oNbFZfH0az8bxiXqaxqC1M6ao0WJGe2QuCLqHa3G43Gg+Fw
MBrB/+FoPB752HY4gK/xeAgfw5QMGSXwYwx3DYej0BVpxXdbLJbDhPifwgkxUesjQOk5Y0jU
laSpBv7PU9sDuo688hSn5xkSfyWAh4qC1hcbd8mvSp6lPj/xtnj5l2PUzgIPaDZQSxAp7TIE
1TvFDzAsk2SE5gA7gYHAAqMxfsPLkHnImF61NEWj6BVTUMxx9BTTKVd7U0gLeOlM4YMvQ/Fi
bfB15OxhGCatSakIwjD+4UYNxe6GtjN7ghkhixa2NfrHURg7LwpzGYQgsCn0KT4mfV5PuiP1
g0EYqwnCsgYRIeqiYBXQqjT6Qw2+HgxxLhR1teH3VZHs3oiRSFob8XuLukSm/6BRV/8AL7PV
22VdBCaBjXZka+oSYdihHAJhGERgx3zr0QFYnUdhLh6dtCYV3yUOq/ooRk2KbKIBqea6yTNZ
SpnUH340dlEmXUJ2BvTj4kSNVoma9jSNEyDI48FoMBghP3O57OF45N4NgWbD1Qi1LCzeALbO
ZWxSNDA2aSF+YTFjO0mepQbxHBmr0W8W7NcX0+3e5XdjUBooN7UEghP/ewDqxqDEM18Mlsx+
634FV4fgNZTATcWrYQI/QOvOAKD+UPtIUmWT9g+u9jjtK8D6HmcpjFbVPvxp76ZgzRlQKVay
ZoMLqx1r5nvWjPXqCtOTH0W+3cPHs1kekQRLVWOWw9907Iz7+avffQEHYFJy7pgp04HMWWqd
rCraNbRm3cqa8hRF1d0yRqyo9j2bYbGakzyuEDTbPJRNPaJEUDH15YsX+w1ttk0sRPGOuoqI
urJW9JL6oYOl49NZwGBvHG8NUt6nUOn0Tl40EzjeClrQBMlrA299OjN1y6nzE5TuBFvPBASG
AWyI/fRhyrB0DLmJbZVl3Vx+38qA9e3lNP/sePoAG4LrTumBh9L8IqOd4rOzIwpMhnKqRX2K
oWCXeeiQh7aGlsrjhUOuMS8pyNcQogHb+g7fUcIM/raEshp+yEXLuqry0Fk4xBMRxen0ZgLf
u+HA88KCMCIpGY2R0gwH/kWYXgXy4MLKp2WItDfvXf27Rz2t6MEelUqkFVjH6U3v3Md3V568
ZL1F8aqPHRMLZIL+xZurHx4gk/S9kEl9lOkGSFNk6NLYmN4eO2vAJ0kfnGuEOVZg8Mg1EaX7
MEkyGkdZVpNCHMuenLODunoyc6QxZOwVzigliHNGolVgC00dZdQfQ3KwqGFNV8s3801U6aVS
6jPaXsj9Opy6ix0flq8IlYOKgNeAzlxiKbteR9vIoRnsdLuav6me2ZqPgtlfzkwHnjx7G82c
c9loJddpE6DMBawE886E8W05/DgzDEvyg8oMIw8FCiqBidZQ0C5UsUKV3gClZWSTQExBChKq
yJ9DDzpn5O164pJAnogt68q/LhvfSPSkYra2YleY3pIsopCS0XMQ5PoMBAnZXSFa0cbi5LuL
Zt5McQOlmkfUvQ1s78cQ/PtJ934WpnvLFfpe0r1nd7thgOj0dCEEppF4n2eMi0Dtbmkdtylj
YLaFJWvrSjSmKbQ3AG2ma9K2c/uD1zKQwDEyvtEQ04ru/zBqNY8iqgtTPQSosqmkWF0nCXKX
loPOSimceei6r118IghmUkfFJyOnryForLgjsC7oSj+troAWV5ivMEBaTDVbSttRX25K3nvU
Em8//ftP3792bRcZkn9OYE+P8h4t9pzipmpTIqLk678u1l+F0T9Ql9Plv35xPUBeXiy059R3
62T+16cJJTADfKPJa5wBJZnx16KJqBa9U/3ipgBS1H6Dev3MlWe+TPqULCY37jzBNxBKGbKO
kmeyRezP/GZ0tPoLLgVQ+jvlUs6gh0J0n5Mbn+u4y9GEWJtD9kpqitKdH+Or8W/nu9uoGm+V
6F6qOzNnjZiH/ZVBZHOaopRA1dJEXrh4ucFQ2EPfKSPqdbad7/LoTFPnjgNpymquM/E55dza
2usrMl2slpizrMlYWma6kdlif5wvd1EvU3OrDBIRrVSYqd4n14vaLiNWwOrhRMdu3cYVL57/
75ctR6427re/HM8gQXSDmcwo9gizck3EPkplui1mn8uU0ucyZY0+mtYTSzNpbQ/AgvvjlBfN
oBXdU1jVBjqAeTNsDcUqt69wj1yBdey6RUN/1nGv2sX5k3VFqEvTp7b5XV+AAX34RlpX7h8j
UxpgL8AA87ouqxgsJOC5NOuWQ2SPIkuZwRNz3fOEnLLiXFyRJ9zzxN2LZxDpx5sfxWXUYV5F
19q377bxBs/PcVXy8uXLqC7CGitCsjy3FhWEyHqDLfhBn1RzB770xvGg2WJAPDL9HreTChee
5TuXE8O4VpNpeQr0KAVhOtZp1WPahI7mXbpg0teAnc8GNWdEmdIp74GDpJmj+4f+6r2v4Wlw
64Q4rk2D+/QtINvLOMI5Wh0MI9VMpVI8dOqYelTOnqayhPDreluwgX9UAPMQ/wVLQPjjmF2e
4DesGsQ5Ua0+RhzgbCk7B3GYxpOOmEwIMAfinfhAbme2wMQh7Z0x5NaSZKwm5W1Nc3SEpdu6
tuVX5BslXLHpRQSQmdbmnHrvl28jYqysUI2N4Ni+FHCxvTrZH02dh/3mRf6f6MhXUxMGrCED
mH/oAi+TXuTlNj70lUl+VqxRF58ZVHSXsUyBkT/cI5gZMk/6mKL8JekbQPQhAqclt/7aBD9k
xJFebHnA2r4keWREIKLsrODk2zlQRUlubne1aXxNjWqOGKmiUQ5631sxD1sNwJrCdku9FkmV
2XyTT3e5a7edRaJGld92Nn1F7pwG7pH0S7KbYIPEdr6NkiSuUbfT+N6df5nvosoDNb9VKwjz
x/veYysIpUUrCH2gFeTxy7AZHnHtUEtViGMnwl/7uPCXTLYnzdViovvjZrkT6W69ADulkUTN
TUXSR/xP1GvNCqKDqWfs7fVnFTHgCk/t0jRsC794tFlsZRVX/y3bWfbtRNhOjj0smIpnZIxd
5mOvlrjFWWdK/XZZeWbB/89IyjPqWopqOB//QElKhU/tSYo0HxjnqwDQXp3ij6bOi3E+9n/O
9944X+WY2R+b8z2SqdG6wst7IWrmQyJq4WGM6hk06s+g0TPOoDUwNdOaqTG5Z2p3a8RbrLcW
buXbVGvqE8aolh3QMsWq2BM1QHtn9S23I0dSsM95PPR8LrAbjwt0F2dwsKUAW31vDK7g3AWJ
dd0Gg9Fw4BorsNliVNNxDAuId3jO40kcM5jVLFmcp3B4gM30KNwB+zpcUuxwjQqd6vIiFRZP
GpZXmVWYCyyuMgnxYuXqETU8TuLCbVSBm4tDOhB2LszdhgwSYbRHJQCu2md7C1x7uZzlm8V8
GW7WwFq4sWcB+yJ3xGS3yzfbiJwoxkzrUV+R+XI2nzqInCQZqSk0Mv5wR1qVNtJCwOU97uuS
TBEsGFnAyPlqN5/5T11Zk5NthGitzrZELRX+uBDsdYbk/rhQYrBv4cwzQ09y4L0QdOPWW47H
Qre7zbyusAHgCptHt+bPYnQsG+Ox019R65q8w76Yu9igndvTH9+DEJvMnbaE5Rj16rIWjUH1
x7ZdM4ipGTDT1J5B13++XdU0l3T0oEf0vQYjeSP8fD2JhIJoRJzRibS7nURJO6Wbugr6Qrqo
BZawcFHd0T77Nt/kj49JVNH/Aet6vUJOOAt7e5nR4rfrKalt+AA2dIshDYvID/VnYjuJZ4u6
7Pwu34QKdMnNTgosAjF/5s/1xSHEA/KmMdp0zfgWkfy3q7expGGzRbtgjUwn2zxm0Jk4C2MX
7viUw9gPb4MsJry8ny7chhgCquh+vnNPzW+BkcuoTY/63vkzlspFlvKebm4AAVeub/cuoRg+
vIvr+XiA5YxtaTKbxXmQVn12l6k+CFWewNoDYpmi2d1Gfs2x5t9BstbMv+VZ8BzIESXL2fZx
hwUu21DxBIBawdNtdO6A08tkPDrySSr2RA0WK6LUchrDidCcnrFdwhrLkVPCuJxciljaKrGU
5Nd3aB9xNqk8QsLi+M78BsRGaQMbRRFnS2iNvZF3JOt+nOfDFxFlM6obUdgXuNabVYLEfIaB
jyX3CWZQppg5gSBuG1e8jNhD4enciTgcezD7QNT6iDUTgEQ+YqUMYmajowEg3v6fAAMAC9Lo
XQ0KZW5kc3RyZWFtDWVuZG9iag0zIDAgb2JqDTw8L0ZpbHRlci9GbGF0ZURlY29kZS9GaXJz
dCA2L0xlbmd0aCAxMDcvTiAxL1R5cGUvT2JqU3RtPj5zdHJlYW0NCmjeNMw7CoAwEATQq+wN
8jGaCLKVxjaYdGIhktaAbJHju0LsHjPD9M6ChGkSS6U10kmZvUYFdhy52BCFLzdxmJICJ/UX
sjXbNHds22zAKdncs//9wDbtMDzlipl2EWYvUq50IL4CDADSNCGZDQplbmRzdHJlYW0NZW5k
b2JqDTQgMCBvYmoNPDwvQ29udGVudHMgNSAwIFIvQ3JvcEJveFswIDAgNjEyIDc5Ml0vTWVk
aWFCb3hbMCAwIDYxMiA3OTJdL1BhcmVudCA3NjcgMCBSL1Jlc291cmNlcyA1ODggMCBSL1Jv
dGF0ZSAwL1R5cGUvUGFnZT4+DWVuZG9iag01IDAgb2JqDTw8L0ZpbHRlci9GbGF0ZURlY29k
ZS9MZW5ndGggNjI3Mz4+c3RyZWFtDQpo3qxba4/cNpb97l9RH1WDtCI+RWIWC3iSbDIDJJvA
jZ0PHWMhV6u7tFNd1a6HHc+v38uHVOJDIlUOjIyTKZIiLy/Jc8699+MbtOpWb6pVLfGK1SUS
qzv1r8f2zT//stqbH8qKrDjC11/gh2+/O/HV5rRC+s9pA//Pj+/Q6vn0huASMxhLloitMC3l
CtGqFEL1fIIB1R/V/uMb9SPX/61aSLpSXbHpileblzff/v0Frb4/vPltujElQk3aNMam8XVO
Zi5Y1iWub5qL7krdufw2LPVv92++vb8n8LH7pzcIujGJzBjw72JVY7UOmCAMd/8Cn3uGf+43
6n8+v/mPqqrIf97/nxqBmhGqFcYloxxaf+/8zvrf73BJEJfq9xJ+F2q04r+658uxXTtDwTi1
qGEm0FJ/MzJcSVhFTZPiner+wz0YQvuDmTlmQv1FsTIBIiUR/e7DwsPlokqWlK4wR2XFK6SW
XCA77m/xLvY7tC45Nj3Usoia8ENxury2x6f1HS9J0azf3/8jnCClJRcLJsjhO87ntG2Kl/Es
wUB8fkcxoeBzw3xJrQc5PNktsP5QClJP7YD9AEyb2x2AcZBed7FtdofXrRrrDgwp6Ar+wkjw
vpXZ9Mdj83nvfhCXvKp44ouEUmma3KnB9Fjngz9zzuaHuSOlQBXTU8O0d0djh27/1B7dAVEp
UZWyBcGCXWcGnqmntm39oQh4dnJ2TNbu5KxxX7rN8fCha3buqKSspeTJUXUjd1jrqu3HS7tf
39GyLjZrOKRFqx32/i/aMFJ/+xNcJWXl7xkVLLlnFUJXL8F6sAf5XrsILmvBa99HjPG23el8
OH7xvyhQaqmwQGm9pPgcuxkQq8p6wc0ATaAdIyXn+lpocq4FdRHDFWwvBWady3PVmrGEr5ZU
CjyYj1KzYz//sGYlLX58q/dJmY8Rz2Xs9frYPYFDt/tN1BAYTgJdYAjwDdWLw7aNb6DWu4Hw
/A2kDEro9cY0Dvau2Wy2zfEQnSh0XzZPcMvxZ+I3JZ2fp5DD2zfeHBggxA+APjBacSZL8GcF
RfCKVyXh4VttcIr6b2hAe9yie/ZPNelhA/zGg6ZMSuVZpimdbwrPdw8v2GxLWgtlVtOU+0jE
rI6iuoSTdcPqdE/urs4fHW5GePZvGV33pPOjWxQ1jA6OND86sYM7GKrubah9EyGqZmmBhmnu
e+cVsMQhB5ynMeRQKMuFHbMDIAUKg/6li6ZKzAUxV0gcRzE5XDDmFXwovm/3j8f1HStxcXg+
+vglZ+GR2dZgVepN1z2W3vgGIGWPDwCJpfBRzIhMAz8Pxpnrs9t98YwpuUQJZIppdbWoejOU
RZ+Oa66sua7hlX3RBh0D3oognD3s3YAzi+bo3ew32o7DEYqBy20uuFTfBWjjocv+4dt1Gx8J
IeiResgZEj50gAVvm7bxERCmKLotoWEIUud58rROLxBMBM/BeIEDvMiwjr6iMAb+5ngYoK9N
s76DX4vdWiGvb3rXGBAP7k9vBixW4xo7fe7OW9/kouJ1npFguoDHbjGSVH8N6yw+5FuIlTB1
XNVqAsZEyHKp1+0XIFLKQAKuo3bfnjv/RmJcz7ui6lmAoTK9XsBVNPqm8flN6sIA/APrkKSU
PcAj0swUJnd4WQNetBB67KKEUJxyeEHrq8Obs/PYnDVWDkiLmezJg5RE9l+J0xRyHd8wns/t
sfVBdsVpku+MBjIHc9c976N3Eaq18+ffRVIZFg4Z0ItJmBm/gQDNqnNaObCv9Ex0vVbSfMXs
wa/Hw7ntAsYqhSRL2A8xljq1oZn0xOFmWYEj11lGgnaxxX6ceEwt6cneBGiCxYj1mNGb1BYI
jby9Xst89ErfRldAt1ZCyn4N70YBhObYPgbnC9eS5TPDS9xVF1oJXJXjMTc8pQwEx3hMDgvm
2YZVcsY2Dhu07vSA0Hv/puekXsIrzUCXU7d/jpvFEMV854FXK8UT448k55F+y/yH83r0GpoD
/BqKOqROXsecY3YdySDCU3duS3+sGhGe9bAaIjv5ruLp1xErkDqmtAGbne6M4dRQn3ZbPPVl
0/bmRcNyyKQsgecO6QasrAXPdg0MvPjUxXnDnBHij7SMsfnrUQvpuP6SvImP20lmEXLb1mHk
MtF2RMnFfFOHk6Mq0XhMsRGab+wwZoRjjUnf1g0iEJcB10jD2psZcK3vQZ/BLlRrUC0nR5mP
HCjftfys2TfaaTXI/HLqTh5Fg/dF9kR5ZuS+SeHpWL2lltMyl5q6hCxmC6JJ9qjL3aCxwSpb
dUB50XzjLQ8OPavpEmJrCWh7+VdjVNqvXSzGcf5+CBCNHf5rmJxwAyHmS/l0rmZqZR7ZtSp9
gKeV6o/JomCKeZCfDpf9YyC5I0qzxyrO8Z2ZM118ZyrXYNO7Mkcd4wgKmk8QxgnLY4dIY2P2
Y7PfbH1jEVTRReTZvmS7Volfotg/n/037KZlYqwPcj9rX1vxxjYsdskloYSJORY7F+hFtZbL
vf7zQa4hxvVQnI/aVjU8+nfw9JceLkelJAJlR8+GG9lyrqj7Iqknni88ohFbzyMyNdf0Z+j1
UHxoTkqnQQGzhxVWjGQz++L34ucfv/8z1qWOJR9PsvjbhEfdwMCFQ8CT0B2OJeZul0ef2eA+
VpgSFJhRJj54wT/4UDJc5ugSBvt/t7ucziZmGlrccO5su+gQ/BzpnrAOVkOP+w3U5KG46PPD
gdxqvX0DHFcU7SnQAUVNF6kNXycEWvvM8eGUEMgmifH822oo8tD1Gk+39HS8EnjJZDbp/9rQ
vMt6KnNP/dJ2z+vFtos/EQwH2sk2/xpHmj0P0kIe9Wdo0h5c5IsIxevMaSc1DhyVcy/oVDx2
cExtWgDnQLfdXAWbrPDTJ3MLfxPcwoRM4nMcI/QWZP3U7A5PbXwHNVGFaySPpQo6y1In8ToK
IuL2ZugadSWw64vDB7fHjkJb/NWXOOteAIq7MWV+Gs0PfYCmt5WsxPg4gMEdlaDErI5EFXHw
iaulfzhttq6dAedfBQGs8UfeQUExQaAdvX4+7zUb6pB6NBU7t40dVo9YovGI1iM+39bl9XWi
scPrxXxjl9fLCV5vUeaY12OrLsQNDrifrJh+w9zY1bvL6+vheO7s0/Xc+6n1EYCxjPN5UnlH
AbxKmJVUlxHTd8mTF3MlAC9CVxOxALblYOZQH5s/7Eh1P6FKyMTLh4mGfn36oBF4w5dPTN3D
gPQ0HB8nEn7ycRnGQr0Nswx5TjhR0M8LWo8YWaoz0Xk8vkaA7KaeWxOPPAUSgc4yWhSkNgis
GVjsMBTjTCxRG5hlGx8aHQjYeKwsx57xraI8Ijmcp/brVskBY6ZOcSg5HHKfd/VpL76eqSWY
PXg+Hi6vgZZQEZatJYyyDrq9n3WJlAUTGvhXG1GQ/joaZIhmaqdujWCr14WMqHp+BgQm6im/
dlwYmXVkiKl8QY5WSzJkvwrsOjPqQ5fNOrqlC9UQAReA8OWQRJ6O2hhH5rhSnL1vaomkWCI5
2BTEY7trzm2guEm0QMDwFbfeQss0HQxEWow1mVBvswPfohnguGYw8fhjr0OANaPpZdGUBkqm
KSlK55s7Q1nd/ucf10qo+z7+ICy1DjwIAgdiUcpE6lsikrDwTz8zXWKamZth86RFENlFGNPl
Gkjj68hwAAlZMA4WNslDEzTAg4JRl6Axmzp42a8VZ+nWChF+XFfFZe1wmKueQRHL1jOKXzxb
cso9KVLzzFgUt3I8q/CvMEDjvRBUlyzLS4jW3UZyTrGfOp5GBEAmpSVPJx4nUKTiPerRwZ5a
YnznwyEIeVOvjCHFy43A8Y9Dtw+UF9g+UqXqLJg6p3Ev2W/WdURJBb5AliQuYLPWl/a8PTwG
OYFI4nlBAGaIiO/IFNl4wh9+XBwoE0sqDKPkAzPQp8Nu0+y76LPQJ1awTMfT72aYINEF3ieU
O9vRUbkUZ5nO/lf+OuXjJjuf6ySDPPo+y94n3yES1A7YWMGx22y7xt0uVTzH6mQaAw0yPDaH
XXyvli2z1iV44Tq7bDxZU53iFYxwq9hT/Dqsy5MP7AodeQRP5RDYxo48gnGi8UgewWS+rSOP
YJpoPJZHMJtv7MgjmMflkR6wOfJIPcgjc4k2AAK1FjRWSmzg/e9aIkHF0+H40py7wz6QSgSJ
Y9arHxIKz79SJFQmkBYPk15ougwTGq58965gqorA6B3ArdhiuUOIKbkj1RngWeVqJepQGzRu
rs3OLw2tKU6nYYwSPIhBQL9sTu6pBnSj+YRZNzzQWceaKHk9UsPwdh23qhEkcO79Tr10D1+O
mOgmlKv6FQzYZiN0TemrL6KeBJF4Jtfjp6c/Sv9N5IihJUOR/lH0dgOhcsgYIUjjq4zNwOrA
BvbaTWzGVwkPsYSRJlu9EbLEN4g3QxXf6dztN2cf4ehdzq2hGAkCm50PgtMGipifyLio9Thh
/xtUArxUJZCVI9+MsMXoxbxiyKTwEaU15zVgoyIM0VaILlJVelbl6xeizq+EDgQHY+sb9Ia4
3JD0bFOWPnRNii09c/9lA7aUxeltaEaaXr+TMbK4kmGRueauBnUFUcdyp7jzzyoRKTTulJsk
5Qj4ktMhXWliHtzXWJVD3iUzHm2iyiHDDPErhvNAkPmYehB1vlogyDwU3fP+RZUStfvzKSgg
qAXJKZ3xi8oxTK7uU2wAnZG8hQkFmyZybFyTaWkCCR3nyxMn8JQ4MdFF+ukpS5N3rjrNd35H
wllmHgCyanV7fOn2fSZAhZmpbEfwdNgLxGLql3ZN9WWsrpHt+k5Vh0XKQjCtl6R12MvkAVXv
1wH8xldFRz1leQAch1kdZfoIq/SzIZdjkAQfYGLY5PC+D9STpVUfX6ENjjI/Gh/JGXWM1DqM
Kku6wEzXupjjxGEwkoaSyXIFXcA8Yy1jJGNkPG3SlVuSVSJ9nPJeQQQayVKpBF2SpGIB2/0W
DkVoZ3VqrUFkVtmYeq6qWInNJVuVgG0QYTGJzaX5JhvIxBNFrPV+/WJSSo+HzWGzufjaPlBz
2csxmaWeauGJKpJQNdAe54oiUwkYpq2ricj5tiNJhFSzTR1FhKD5tmNBhODZto4eQsiEHmIA
0lgOIdSpAiEUQIIYhImaxvANmkZQSEneg0bhatMjl5wZQUdt/BFSap9Nsvp1fScA2DfPrSfJ
wEkhPF9ALIiXIBWp5Bs/JtpmN1fOKB1CJW2PZZe3uQUzBBizVzAzL6MkcjlqRLIVmbshsPBQ
bA8vyvgU2IZ7wnOsE1mWFAr4huJMoAf041t1RqfgLajGU5cJ57PCQ3IEfW/5ko1l50G0IGO+
kW9wYqpw/Fl2uQ8g4Vy9FsEI6ZwT2mtub335rqIYJVNOer2o+L3wDKGw9mAIngcCCNxdlWvs
4qcpl1gogcAxJF5lzOM8tiOUmw+NuizTJyLpPU55AuDgx4BTU1LJ1YISJGJg8GHvY8OKpXLH
c0w5y6ml1okcC21y8Yk6m4K6BULm5toeTkEajGSULUqDsVZ58nEOSWYvfG1mTmjfW1OciNSk
+pqp1C417jgHx6YqnNpduwmSZ0hJFSReoOVgbkvfgug1EvE0nMAwN0st6jRXTq7Lx3zLMJ0D
MnRVzoL7Ao/9WqUs3qFIFgQVjC9RV/qUp8vLevHaY65g7lBPX/kwcTsurCNS6g3cAGFiTJu6
IqliM6NuQ3pq4Ut84I+CL0mIsfGH7nRpdt2/jcMqfUHCu3TNAxi95+NI6yAUpKtvzE1xbrrd
KUiV5On0NEcYWaxvxrWZc9xlltWpKLyukhCuKSplNp6AfSV01DVdY4N6+htIFAihRbKODYd9
Ouwu5+5PMQScHc4DaecwdXaMILLUzG45z0gWmejFtEzo9VqGLxyR6PZU1Oswd9d767LvzqfA
iStJ8m72ORumIAV39KXJbTJ6CpBZzBeTAmX6sdR0yecDJgo97nzy+CQRop4uuHFUI2zLmBW8
ABIAXlPi4uXw6tMsibXMaJZcZ6YUyNpXxSKVarElEj+BZ6TAjNcZzZOO60U9jzx2a1VIUvzr
cNp2cTJp9CKmw4M5q6z0e357+o6iKiQyQDmVhGPn6ehNZCqjxTZ2BCfCE43HilM939aVnESi
saM5yfnGjuhEq7jo1EPcsepEkaM60apSR/R2BQUeB0c+2eXWz8B2AjwZ970bFSgenpWmISLl
MxSJJYkrlLpco6+GEkzyRXKLX+E5TAicPFGykWPkiIHgSaS+voTDzKN+9EQV1Oyt7hUyjYh9
ojOtqCoj9CQYZKWp/1ECtCz+ew2IsPjfSkVccMFE9fvaQ/C0rGoh8hUNL1rSm2Ch7CCFKjWZ
JMix1WJTe3PtcgWpu8vp3B79V5kMsDkjueSai9nsm92XP2ORlFFfBsgqqVX0VjoCgI1vW+x3
2DfHL+5iWYlYqo5cZTMLwBBuVbINWDy2+0f1ApHieHg+Ni+ekzCF00nWUbudvAIcrR3y+iH/
KGCXBV4LKdtjwF4wxWIRY51CkIwli89khX1R8bU5tvv1YtPF/Iu7lH2i9q8ffSH3lUxn8gfc
9zGXLalnBkeyGFIM9yvsPR6GoUmFiot6CeOWtgCxeY1v2zLDUsZ0+Xdg2O3Uxun8ifx9q7UG
NEqGyErCVB/zikKuyafH7uWljdQnEJFN3m+J14emnmO4qctFjjn/YcndUnsFKlbPCO9hVQaG
8SJaP+RHNvtN3L0W8m4jPvsM+pDafZP04PXyZeKrqpPk3V91/FwGP6EY3mYfhe1IsNAPU2fP
VqCIciGZBoCDcYpkzo2gdkS4mQ6joG+3U/iOFpcBpfMJ8y6stnBpuM2KOH0TvKF1hbPTQAZM
G1Aqa2WHMtKpmL9t7FBGShKNR5SR0vm2DmWkLNF4TBkpn2/sUsY6Thl7kOlQRuFSRuhBaZIy
TsbNNa8RM7wm2d8kTCfj7sxecA/F9svj0VCRw05F+BQNaT1mCRREsulUg8xVT9JdhrCu1h5z
5SEum77/AWWJqeKE8CWDew9nk6nrm7jZBcE9DMSMLRnKzmnrVSb05psjqRGjVdq/w+D7S3BT
2vGXk6NoSUKCHCkXVLUiLg+0sZXuVC5ORHeD0eZhf7c9fN77u1EzSZaM1cNYPzeeY5oIA+ZY
dM5lGaIKAjr0usn2d64LhEbss+o5ogIpKkYvi73SYzdtmIIsUJUfjx7kZW/dy8osGAL8OAoG
ZzhQLbwQMLsy/5O/YaREMsWto+n8l1MXX9+y0gam/uKjCZtzsp84h5ZEkswCO3u9TZPIeC9w
EubybWwWvW3BgL+vAy2GJjGfw5Vt6fZD/b4M4GNN89P5RyWj2kgMafRnbIS0np+xAUB1pJRj
aeI4Zf3lXNCjyKkwhDK9FH5wub9sNv5lw9ASzkykDS63n4NMk4qRJSN9RaLJUKigC0XuqIqV
kpFudQ3HqQiRQRdtdwxSlSUlfAk/pVYBVzrbGvgQ3E+w4To/HxUmKnOHS8qAbbgJ/VaGbIMy
KInpEjJIZsLkkt0QLd4cXqJX0MJIsToBtQgixa9Th+AGRsZnKNnkPY6wW2LQ78NxeYqFwzgn
nZcStGQcm6vRvHT7+DYsM5R+CeaZ/SyjhO9gn1Bi4yiHl4NfGCuw4NkUb3wkT81rp4A+Ktq9
F8rs121Y9RL3o7GI7fWp//a7E5Cx0wrpP6fN3nyqNtSy1p/Cmmdx9amnN5UeXzXUPEyHAQbW
ZmbpBjKnGJ5p65BSViUaj0mpnG/rkFKGEo3HpJTh+cYOKWUTyfM9ZBmTUuZmzyu0qQooDT3D
IlY/lqJnYGY36/nZ7nDA02aGMbm+3jBXDfPtLz8NuGTI5sVYJJTHfnk2dVnEMMMsGK+EBuPj
GN9LLhhXi6qDNGt7ZHeH5yATBXHM89ZjyMXkds2TCzFDLmJdpDp34y5p9mQA4PnYBvohF5XI
W6MhEresEenihDinmO/JVFnkmD5x8wi0oVSAk4TSzbm1iuoh4LhxzhXawxCP2+xRjWuk3YrM
HA++dn32c7nqfjvniVUi65gTnGUEi/1vMYKBKTESkOyqX14nPGnOcFivDGcY04Rf3Kngdi3c
UK4FP93hh8fuHMbCa5EekxLijmkF4EjE2bZODamz9l2wjK2c8HpZ34FFi3Or/q4XpPyHe2pr
NW/YU82to2l1E1eZibkOHdLRC5tVsOkewzRaSvPWZ/ASmRCC8JzLMhrJyst12lrT3qD49MZo
gqE37zZBNAGRyfhfCOy0TdhNwM6aMwvY2bYusOOJxiNgx2wAIZi4QnQU3TRxN6ltfi4uFhTz
jV0sWE/MXKPAkcnhJM/PnPTjO/gxHL4GtgFta2B0SlXqM12FCMdXv5rxVQupSAR0Nn2HbZIT
X6CwP3Cl3fQF1ReJ1BesiW76gguy7Rf+X4ABAAbQMcANCmVuZHN0cmVhbQ1lbmRvYmoNNiAw
IG9iag08PC9GaWx0ZXIvRmxhdGVEZWNvZGUvTGVuZ3RoIDY3OD4+c3RyZWFtDQpo3gySeSwW
cBjHiwjLCpXX0cGShiIsrE2YytXW8Xa8W23lLVpmZLFyTKIxQouVTW2VZUopa+3dHEUpuoaO
0dxt1qJIigrPp9/2/PXsOb4XQF+fFBRIUpKcPUtnJ6OjXLkiZ87w+DEidHdLYaGcOkVuLg8e
8OmT5ORIYiI3bzI5ycWLmJkxbx5GRuTl8fAhtrZERzM9zcQEhw5hbMyCBVhZceQI4+MUFjJ/
Ph4etLdz/jxZWczNcecOixej0/HrFx0duLmxcCFXr3LuHGvW8PIlJibk5HDvHjY2/P7N+vX4
+DA0hKsrr18zO8uGDRQU8O8fU1M8ekRGBmlplJXx5g2nT3P5Ml++yLp1aDT4+tLby/XrJCaK
Viu7d0tcHDU1jI3x4QNFRRw8KHv2UFvL37+i8B8+jFo8cIDMTF69IiICCwuJieHbNyoq+PqV
79+5dk0UwRMnWLuWbdtITubuXSwteftWli6VZ89QtWoVmzfj5MSWLQQGEhJCWxv29vj7i6J5
/Djbt5OezswMx44RHEx5OVVVpKTg6CgrVkhrK8qd6moGBti7F3VWeREbi+ofPcqtW6xeTWMj
1tbi709PDy0t3Lghnz/j7k5oKHq96PWYmkpRkeh0oiaDgkhNRTF9/pytWxkZ4f59zM3Jz6eu
Djs7njyhvp5ly7hwAYMBrZaGBomPRyXhzx8pKRF7e1HD4eFs3MiLFzg7s28fDg4UF4uyadEi
Kivp6iI7m507xc5O1Mfly3n6VJRlly7J/v2i0qIQqlNK0oQEUeI0NUlpKYODsnKl5OWJ0vDH
DwkMlOho2bFDbt9m1y6am3FxEfVF6RkWhqcnmzYRGYm3N35+nDyJlxc/fxIVJRqNKPzv3hEQ
IEuWMDzM+/f09/PxoxgM/wUYAO6q8OENCmVuZHN0cmVhbQ1lbmRvYmoNNyAwIG9iag08PC9G
aWx0ZXIvRmxhdGVEZWNvZGUvTGVuZ3RoIDI5Nz4+c3RyZWFtDQpo3gzHy4qCABgG0BfpUYR2
tmjTKszoDj1Dj9E62roKioKii0VBJMTMOILgOIMM1UBaWBmlZvp/09kd4OUG6MAn8AZcAA2Q
AYfoRvQFuMAP8AF4RN/AO9GrPpEBBES/QEj0ByhABJiACthBEERR1Gw2dV2/3+8cx83nc57n
x+Ox53nP5zOdTjMMk8vlMplMvV5fLper1cp13WKxGIahoii2bRORLMumaTqO0+/3U6lUMpmc
Tqfb7TabzU4mE1VVO51OIpGIxWKz2UySpMPh8Hg8rterIAij0WixWOTzecuyfN+vVCrdbrda
rQ4Gg+PxWC6X1+v1cDjc7/elUqnVahUKBcMwzudzr9cTRZFl2Xg83m63NU1rNBqn06lWq+12
u81m8y/AAIug60oNCmVuZHN0cmVhbQ1lbmRvYmoNOCAwIG9iag08PC9GaWx0ZXIvRmxhdGVE
ZWNvZGUvTGVuZ3RoIDczNj4+c3RyZWFtDQpo3hSRzYvUZgCH/4RiLz3YSy24terC4qJFSy/S
ghepF8G2iB+gHoSeKkh7qXppBQXXtgd1RWsril7WD9B1PncmmZ3ZHXeZdSffmWRm8vHmzXfy
vkkmyTjensPzu/ye8Xic52MZxmmWN3kk6DhOMpL1WzxiFRwlGUG7TQEzCiIYv8lPAJMTEBCe
aIzXEnCaJS7SoS9BX7aDQRhZSRrlecYq0SjNUOwMrHUe1CilSCklRi2LBjmw2kOrA/1eGNlZ
njU4JGg4jB3RaLL6xCnRSpHVy7RSYLSKBBs9o6VYmy5SceKN0phkgj6M8/F4lEayucZoJWpY
7A4Km/2JXxbNugAIGa5BT/SQHidBnucNLmxL2PIT4PEcqLJamTeqkrGiu7Tpyyj2ljn0ro9x
nHKgQqtlCTZx4qfZaJlHnIayLB+aHVYrcVq1Zy7LcN0KBiQbrIgIuLEdKKw+WZV4Y0kApGpT
bqjGo7AjIxRnElyhlZIAqpxe6fYLrFaR4arhcgE28zwlGK8HIuBwDxfm5m79/pZ7KTsENSwo
VscJlUmcBhusisgORj6GAly6eefy1k8/+fbQ1wuF2z2rTqtFAdSAy2d5OjDXBWPpVe3+1Jef
75qe+urAzK+XzreZF7JN8Hpdsbo+Bm8lbPqJFfQ5vfqaeLD/mz2Pnt38e/7y7N7dB7/b/+/T
6yKscaCs2Bt2OCRoj1Fxlo9F0KS1ogBrLerZ1bmLrc0FNWi9afx/7PjhndPbf/nt7CrznNPL
rFaVzTb0pHiECMpZl6MAp6rd5Y3KO3lx/uHVe4+vyQ4pWfW/5i/9eOJ7RptUrvZAy/CEJhco
dszrS6fPHd3y8Udnzv9QbT/uu6Ro1jb7bzZ6rzekReBy+YdDQlGPJLjaHRZu//fn9i8+m5nd
Obtv9z93rywSDzq9V4JO6g5dp9yWGIlGUlt7cvLs0T9uXPz5wqnpmR1TO7b9dOqI5lAodt8L
MABivmsJDQplbmRzdHJlYW0NZW5kb2JqDTkgMCBvYmoNPDwvTGVuZ3RoIDYwPj5zdHJlYW0N
Cv//zP//z///2P//9v//////zv//0///7f//zf//0P7+5///4P///P//3P//+f//9P//0v//
7v//6f///Q0KZW5kc3RyZWFtDWVuZG9iag0xMCAwIG9iag08PC9GaWx0ZXIvRmxhdGVEZWNv
ZGUvTGVuZ3RoIDI4MT4+c3RyZWFtDQpo3gzGzWvBARzA4amfhBWrXZSDCy3KHNzJTUpyFClR
HBwY0Zwd1Q7c5kKtyB+g5eIwJwduUmtOYtYSS17a97M9pwdgv+fjg/UaEQYDKhWiUTwegkGy
WZpNvr+p1zGbubpCrSaVYrXCYOD6GpWKeJzNhttb0mlaLR4fxWQSlUoaDVEUqVY5n6nV0GoJ
BLi7YzplscDhEItFJhNCIT4/+fnB50OvZzgkk+F4lFiMfp9ikctFHh7QaOh2KZUkn+f5WXI5
ymV6Pf7z+8vpRDKJTsfrK5EI2y2Hg/j9vL3hdjOfs1zicsn9PS8vtNsUCtLpyHiM04nRyM2N
2GwkEux2WK0oCuEw7++MRtjteL08PfH1xWz2J8AAn8fJCA0KZW5kc3RyZWFtDWVuZG9iag0x
MSAwIG9iag08PC9GaWx0ZXIvRmxhdGVEZWNvZGUvTGVuZ3RoIDc3Mz4+c3RyZWFtDQpo3gD3
Agj9////2NjYpaWlxcXF/f398fHxx8fHwsLC7e3t9PT0Xl5eBAQEUVFR9vb2vr6+KSkpHx8f
r6+vxMTEGxsbAAAAj4+P/v7++Pj4lJSUUlJSlpaW+/v7ra2tCwsLBQUFnp6ei4uLHh4e1dXV
1tbWHR0dKCgo4ODgsLCwERERCgoKoaGh5+fnREREYmJimpqaAQEBoKCgvLy8qqqq8/PzTU1N
S0tLODg4V1dX+fn5d3d3Ly8v2trayMjIGRkZg4ODIyMjy8vL+vr69fX1/Pz87+/v9/f38PDw
8vLy4+PjdXV1goKCNTU16urqwMDAFBQUiIiIjY2NU1NTzMzMkZGRNzc3Li4ucHBwtLS0bGxs
Pj4+q6urOTk5Tk5Ofn5+t7e3dnZ2Q0NDOjo6VVVV5eXlo6OjY2NjMTExW1tbioqK3NzcsrKy
cnJyQEBAPDw8WFhYnJycCQkJ7u7uRUVFampqPT09mJiYf39/AgICFhYW4eHhbW1tDg4OMjIy
DQ0NhYWF4uLiWlpaBgYGYGBgFRUV29vbBwcHGhoaUFBQSEhI6+vrEhISDAwMfX19ExMTu7u7
39/fNjY2JiYmeHh4b29vQkJCenp6mZmZCAgIqKiow8PDrKysZWVla2trJCQkv7+/wcHBMDAw
MzMzm5ubgYGBqampXFxcAwMD19fXJycnhISE6OjoQUFB7OzssbGxWVlZpKSkxsbG1NTUSUlJ
NDQ0R0dHHBwc0dHRZGRkycnJPz8/aGhoSkpKpqams7OzICAg5OTkoqKiz8/PdHR0tbW1GBgY
JSUl6enpZmZm3d3dISEhKioq3t7eysrKRkZGDw8P5ubmaWlpurq6Kysrzs7Orq6utra2YWFh
VlZW0tLScXFxX19fuLi4k5OTiYmJlZWVTExMXV1dn5+fEBAQh4eHbm5u0NDQgICAT09Pjo6O
nZ2deXl5c3NzhoaGjIyMl5eXZ2dnFxcXLS0tubm5e3t7zc3NLCwsVFRUkpKS2dnZvb29p6en
IiIikJCQAgwALhp58g0KZW5kc3RyZWFtDWVuZG9iag0xMiAwIG9iag08PC9GaWx0ZXIvRmxh
dGVEZWNvZGUvTGVuZ3RoIDU1Nj4+c3RyZWFtDQpo3gyRWyjdARzH2XG/nIOcuRyzeBsaWbIH
c16IBx4oxsNYmFYjwxMpTcklUpRc8uJk2Mx9m0uUhYlI7ua2oSl3Zpnb77P/6/f78P1+P1+A
qSkmJ/n5k7s7zs4YH6epicZGBgf59QsR7OzQaFCriYvj4ICrK87P+feP0lLs7TE3x8qK8HAO
DzEy4ulTtreZneX1a2JiePGC3l70er5+xcaG+/fRanFwICWF01NpbhaVSrKy+PIFY2PS0sjP
Z2WFhQXm59nbk74+0Wjk3TtycggIoKGB7m7evsXSUqKiaGlhdJTbW3Z26OzEYODzZ46P2d1l
a4tnzyQ+ntRUqquprycwkKIiamqwtqa9HVtbenqktRULC25u8PTkxw/JyOD9e0pKUKlQWnl5
sb7O48f4+jI8TFAQDx7g54ePD8nJZGdTVoaZGR8+sLFBYiImJmIwiFotinVywtERf/7w6RNK
ysuXXFxIV5fk5XF5SVIS3t6srcnDh9LWJsq6zU0ePZJXr7h3j9pa0tPp6BClvKkpkZFkZlJe
zvU1Oh0zM5KbS0WF2NpKZSUFBRIWJgqc0FDp7xcXF+bm2N/n2zc+fuT5c5QIBe/fvwwN4eaG
qyvLy6LXi3KZk5Mo0xwdiYggNpaqKt68wcODpSWKi0Wnk8JCgoP5/Vu0WmlqkoQEoqNF4ePu
Lv7+1NVJSAjOzgwMMD2Nojx5wtgYzc10dbG4yMgIq6t8/87ExH8BBgBYLppRDQplbmRzdHJl
YW0NZW5kb2JqDTEzIDAgb2JqDTw8L0ZpbHRlci9GbGF0ZURlY29kZS9MZW5ndGggNTgxPj5z
dHJlYW0NCmjeADcCyP3////+/v7Nzc2UlJS+vr78/Pzy8vJOTk4AAAA2NjbV1dXx8fFISEg0
NDTU1NTExMSCgoK2trb5+fn6+vrt7e3a2trW1tbs7Oz39/fr6+v9/f3q6urLy8vR0dH09PTp
6enu7u7Y2NjGxsbf39/Ozs5sbGwwMDAZGRkXFxcuLi5fX1/Jyck6OjpAQEDj4+PDw8M+Pj4a
Ghp2dnZ/f38lJSVubm719fXBwcFra2syMjISEhIfHx+AgIDm5uavr68pKSkRERE3NzcYGBgh
ISGtra24uLgICAgPDw+VlZUvLy8CAgI/Pz/7+/taWlpHR0fw8PCampoNDQ0tLS1SUlLPz89L
S0u6urrn5+dKSkorKyvT09O7u7sVFRUDAwMKCgppaWmkpKSPj4+pqalhYWFvb28gICB+fn7Z
2dno6OjFxcVgYGCZmZltbW3d3d0WFhZ5eXnQ0NDc3NwzMzNiYmL29vYqKiqSkpJjY2NNTU1P
T09kZGS0tLSEhITCwsIGBgaoqKjz8/Pi4uLX19dYWFgQEBAFBQUJCQmysrKwsLBxcXFRUVE5
OTkxMTETExM9PT1VVVVUVFRXV1dlZWUMDAwnJyelpaULCwsODg5nZ2cUFBSLi4vh4eHb29tM
TEwdHR0BAQEHBwesrKy3t7ccHBxqamrk5ORoaGg8PDxwcHCDg4OGhoaNjY1eXl5bW1t7e3tJ
SUl0dHTAwMD4+PhTU1OOjo6fn593d3ecnJzHx8fv7+94eHjg4OCbm5sCDABYTB0HDQplbmRz
dHJlYW0NZW5kb2JqDTE0IDAgb2JqDTw8L0ZpbHRlci9GbGF0ZURlY29kZS9MZW5ndGggNDE5
Pj5zdHJlYW0NCmjeAJUBav7////09PTBwcG4uLjl5eX9/f3R0dG1tbXX19fExMQkJCQNDQ2Z
mZnz8/NOTk4MDAxoaGi6uroODg4AAACPj4/v7+86OjpaWlq8vLwTExOSkpI/Pz9eXl7p6enL
y8uvr6/CwsKfn59GRkYPDw8HBwdCQkK3t7eXl5f29vZBQUGenp4BAQEpKSlZWVltbW1EREQK
CgojIyPMzMxwcHDKysrAwMDFxcUvLy+amppFRUWjo6PY2Njy8vLo6Oibm5sXFxcUFBQJCQkS
EhIQEBAEBATu7u75+fk8PDwWFhYoKCglJSUmJiZ/f38sLCx2dnbU1NTQ0NAyMjLb29u2tra/
v79dXV339/fm5uaOjo5DQ0NJSUk9PT1XV1dYWFhbW1srKyv6+vppaWkaGhqmpqb7+/v8/PyA
gIDc3Nw2NjaFhYXOzs4nJyfr6+tVVVXn5+dSUlK5ubk5OTkICAhTU1NNTU01NTUFBQUiIiLN
zc0tLS0VFRX19fVycnKVlZUxMTEDAwOoqKj+/v7Z2dne3t6urq69vb3j4+MCDABo1MhWDQpl
bmRzdHJlYW0NZW5kb2JqDTE1IDAgb2JqDTw8L0JpdHNQZXJDb21wb25lbnQgMS9EZWNvZGVQ
YXJtczw8L0NvbHVtbnMgNDE2L0sgLTE+Pi9GaWx0ZXIvQ0NJVFRGYXhEZWNvZGUvSGVpZ2h0
IDIzNDkvSW1hZ2VNYXNrIHRydWUvTGVuZ3RoIDI5Ny9TdWJ0eXBlL0ltYWdlL1R5cGUvWE9i
amVjdC9XaWR0aCA0MTY+PnN0cmVhbQ0K////////////////////////////////////////
////////////////////////////////////////////////////////////////////////
////////////////////////////////////////////////////////////////////////
////////////////////////////////////////////////////////////////////////
////////////////////////////////////////////////////////////////////////
///////////////////////////////////////////////////////////////4AIAIDQpl
bmRzdHJlYW0NZW5kb2JqDTE2IDAgb2JqDTw8L0JpdHNQZXJDb21wb25lbnQgOC9Db2xvclNw
YWNlIDYwMiAwIFIvRmlsdGVyL0RDVERlY29kZS9IZWlnaHQgMTI2L0xlbmd0aCA1MjMxL1N1
YnR5cGUvSW1hZ2UvVHlwZS9YT2JqZWN0L1dpZHRoIDEyMD4+c3RyZWFtDQr/2P/uAA5BZG9i
ZQBkgAAAAAH/2wCEAAwICAgJCAwJCQwRCwoLERUPDAwPFRgTExUTExgXEhQUFBQSFxcbHB4c
GxckJCcnJCQ1MzMzNTs7Ozs7Ozs7OzsBDQsLDQ4NEA4OEBQODw4UFBARERAUHRQUFRQUHSUa
FxcXFxolICMeHh4jICgoJSUoKDIyMDIyOzs7Ozs7Ozs7O//AABEIAH4AeAMBIgACEQEDEQH/
xAE/AAABBQEBAQEBAQAAAAAAAAADAAECBAUGBwgJCgsBAAEFAQEBAQEBAAAAAAAAAAEAAgME
BQYHCAkKCxAAAQQBAwIEAgUHBggFAwwzAQACEQMEIRIxBUFRYRMicYEyBhSRobFCIyQVUsFi
MzRygtFDByWSU/Dh8WNzNRaisoMmRJNUZEXCo3Q2F9JV4mXys4TD03Xj80YnlKSFtJXE1OT0
pbXF1eX1VmZ2hpamtsbW5vY3R1dnd4eXp7fH1+f3EQACAgECBAQDBAUGBwcGBTUBAAIRAyEx
EgRBUWFxIhMFMoGRFKGxQiPBUtHwMyRi4XKCkkNTFWNzNPElBhaisoMHJjXC0kSTVKMXZEVV
NnRl4vKzhMPTdePzRpSkhbSVxNTk9KW1xdXl9VZmdoaWprbG1ub2JzdHV2d3h5ent8f/2gAM
AwEAAhEDEQA/APVUkkklKQct23Hd56IyrZ5iiPEox+YeaJbFzEkklYYWl1vNfgdKycurW2tk
UiJmxxDWCO+pQK/rDgMqIznOw76nim2u5sO9TZ6mgZuGrdVdzMOnMZXXdOyu1l0DSTWdzQ7y
lUD0W1nUbOostFlpN9lbXCItsY2uvXwY1v4oG+idHQqvwsxrXVWV5DW7bGbSHR3a7yVTI6Kz
fVdhWnEvostta+PUBfeIeXB34LJd0vL6VQ1+LjB/2bBFDnU+11lttg9V8s9x2D3fkU+hXXfa
M2t+U6ihj6hQHbzvLGepcWDJG6HN5SvuFUmyOjZreiDo9TQ+ux1dVmUDDzW92/JsIPBPaFl9
dxctubX01mVbkVNrFeP6oG5lmRNej2gF2yprjrwh4tnUHtosppvo6j1W59+Lli+cdzN+/bZU
T2r/ADYVzI+strb861uVjEYt768XBurO+wVgNd6NrdS5xkaBNsJ1at31hysDofTqemkTUGsv
teN8hocfRbP5xA1PZdDm9UqwcLFPVGB9mQ0+u1g9rdtZstdB7AaLLdj9Gz82zotdL8G3Dx/V
qLY2NdaWXWQ3u9hjd5IWbh39YZh25ebU5ueW0Y4rHon0J9S57GvJJsfsA04COqtHofXxH0V4
dVwxrcin9XqBDbWNLdHBnbakqX1dwmYdmfjOqJvqvMZNgLrLaXjfWTY7U7eEkeiOr2iSSSrs
ylT6if0bR5q4qXUuGfNOh8wWy2LQSSSU7EpY/VepZ2L1SirFqORWzGuycioOayQ0tDTud4aw
FsEholxAA7nQKtkdOx77LrXFzbcig4rng6isyfb56pFIa9PX8G3HsyYe2uk0hxI1m8NcwAD+
sJQ8fr2Fl4t2RbWWCp2Q1jLGmXNokPcCRGoQz9XALA2nKdXiG6m+zGLGu3OoDWgb+QDsCY9J
6kzol/SmWVPFlVrG2e5ri6x5dJ7fRJnzQ1Vokycnpn2DpuVk1uprL67cVjOa3it1g+j2DQZV
e/G6bT0jAspyPs7a7m5WJfaCXFzybXhwAn3tJlA6n9Vaj6A6XQ2osova9wcQ0vdV6dY2kkak
nVWcf187L6VV9kuxqumj1L3XtDRvFfpMYyCd3J1Q+iXNyqW5eJff0jLoyurvybrmsqeJNVzf
ScyDB9tcH5IeRhdUpoo6pdTW2nEsxmUVFx9aiip4YfaAW7rJ3OV6jI+x9Ozeo144s6hmZtzM
JhaN7rHO9OsAkSBDZKn9VxZi5Ob0y+u2twFeSBkQXPNg22vEFwgvalSkeNj4OZg29Rzcs4/U
bL3sGR6ha/HcLCyupjJiIjSNZSS63hUN6s3Lxnh/Vjs+y4zK2ENAP6S3IJB0j84xHZJLwU+g
pJJKBlUqPUvzPmryo9S/M+adj+YLZ/KWikkg5WXTiVtsvJDX2MqBAn3PO1s+SnYmh9aA9/Rn
01na+62mppiYLrG9lk5fU8nH6j6eXkttb06+9zLnt2hwFAIFjavB1nYLpLcvFbfTj2OaXXhz
qjoW/o4k7uO6e3Ew7SRbTW82SDua2XbgA74yAgQkFyuk9V6pmZWTh2NrFlDabA99bqfbYfe0
s3vMwPaZVA9e6kzoudeKMh7nX3NxswbDWwG302fnTDfgtoYXRsPJorZS2q/JeDWWTLnUgvG4
z+aPFVcy76v42MekWbwxtomipr3v3z9o/MBPmlr3V9Gz0LLvycB+RlP3Rfc0OMACut5aPwCz
sb60P25t+S1rqG1DJ6fXWfe+ovNQa/X6TnQfgVEYnSG9Ksezq2TX0y5763Vaaue4l9QaWeoH
E9uVHLwfqxl4zs2ixuDTiNdVlGqoseA8N2B7NodIcARohqnR1sa3rX2mpufi0mqxpd6lDi40
vA+i/eBM8S1R6h1CnEzJqxDlZVdBtucwta5mOHeLuZI0aq/Ssu7Kzmtv6ky91FZIxaqnUF4O
nq2CzUx4N0QepvD+rX04WRQ7KzccYVldjy11Zlzg4QDuO1x9vKN6IY1/sx/VrLsGrNdZf6Vu
VdQ+aneo0Oa21jncbeYGiSptxcd2V9mxBjV24N1dr+p12hrhRSAx3qNJkuMbT+akh/FL6Uqe
f1fpnTSwZ2Qyg2TsDuTHPCB0TN6tlMub1TDGHbU4Bu0y14I5b8FyHWMZ/wBZvrNmUVuPo9Po
c1hHG9o4+byqeTKREGIuUjQB0dXlOQjkz5IZ58GLDHjyTxkSFfo0dRrb31F9WRSy+l4sqsAc
x7dQQe6q9S/M+awv8XnUTkdIfhWH9JhvLQDzsdqPuMrf6iPYw+ZUuCfGIy7hq89y55fNlwnX
25UD3j0P1DnrO67guz8SnHFfqs+00PtZ29NjtzpWikrLSeUu6K+rqW+zprsrptd+U+rHq2lo
bayoMhhcBBcHfDlBb0bqTKH0ZmNbk5b6KmdOyWukYxaZLXP3DaW93d10vVs9/T8UZDWhw9Rj
HAyfa4wSI7qNfWsKx7WfpGF1voEWNLdr43NDp43DhRmUBLhJo6fi2I8vnljGWMDKBMhcdfl1
N/a0Mzpr8rMwPSbfjNquvdk31HY4vNYb6gOujysvJ6Zl4vWPW3Zz6G5Jd9qq/SXEGgMGsaid
F0B63Q6ql1FNl9mQ97KamwHOFf0ne4xCFl9Wtt6Tbl4LHtAqsd6pgem+sxsc3xQOTHRN3Q4t
F0eT5gyiDDg4pe3cyBRsjX7D9jmYWJnUDGzrKL7qMbNvtixo+0vruYGi97By5rp84T9Woy+o
DqGdjUWsrsx6MesOZtsse25rzYGHWGDxVr9pZmbmYmPV6+K2/HsBe8Bu6zaC17fgVVs6zn30
VCp7hlYNNtmYB3sr/Rt3fE+5MOeAB3P7dv4tiPwvOTHWAJFnX5QeLhvzMKb2PiZtH1hbZn22
ZrXUObg5OxrG1SR6tdgrAEugQVUyr6M3qb8D0n4lNNxtaTS8HJygPa71A2Axp7zqijfh/s3J
x8u2+zNe1t7Hv3tsD2y5wb+bt8lDr9rxm5Rda6t2NjMtwwHFo374dA/OPZGWaok8Ox2vuL3R
D4cZ5YwGTSYlUuE3cZ8B9Pn+H2OfgWfZcalmYy3NpoxHtz8V9Otdoc3ZXVDQTvdzzPKSt2vF
XVjlvdVkXW3tZ6LS/wBeqWfmjjT4JJvv9K/S4d+nf+xf/ozTi4zXte5fBpxfu1d1/Wpu/Vz6
0Z46b1M59n2gdOZNWR+8TLWtnvJ4Wd9V8L62/ZrOodKNLWZjyXvtgucWk+IOkldt/wA3ujjp
7umtxmtxXkOexsiSO5PJVzFxcfDx2Y2MwV01Daxg7BVxgmTHimfQDqDrZbmT4py8Y5/YwRB5
icSY5IAw4ID90dTLV8++r7s7oX1vOL1Hax+cIs2fQJs97CP7Wi7zqP8ANN+KHm9D6Xn5VWXl
UB99Eem+SCIO4cHxR84TjnyIUvL4zjJF3HiuPfVp/EubhzZx5RHgyjGIZdKiZR2MXLSSSVxy
2t1HC+3Yv2ff6fvY/dE/QcHfwQL+jU5AzW2PdGc9tkjQscwBoLT8loLGPX7MfMzKMnHe+jFy
K6jk1wGsZcG+mXAmXanWEyUIE3IXen5/xZ8fM5sYEYTMRE8Qqt7ifziG3Z0eh1GNVW+yl+GI
purIDxIh3II1Sb0bEbitxGusFIa9r27vp+p9Jz/ErE6t9Y8lzMnCZW2mx9d3ovrsJsZZQPUi
yG7BuDeA4kLRw8/qD8r7PnX0Vg1U5bba2bWmuw7XVHe4949yHBjv5RtSfvPMUB7ktCZDzN6/
iftbj6On1/Zcix4AxYrx7C7SX+wDzlCbb0bHzs817ftldYtzmNBLtkbvo9/kuf8AsfVn/V3K
qZkN9HAyLA3FbVNh9C7eBvLj+ARW4HWcj1ut47GCx2RbazFcxwvtoeBSanOcQBLGyNOUaGnp
Hf8AYs93JRBySojhq+l8VeV6u3i4vRqKP2rjUMrY6r1hYAZDC3foDxoszI67TldPxs041NV4
yWUWjM1GObBvY8kdnCISoo65b9Xm9HOC/Hd6PoPybbGABswSGgl30E931Xovtrv6fmF1ZNYy
vWd64s9BwdXB4BbBHwKXCKoRAHalHLklLjlklKQ0EjIk12ttdFz3Z2bl+oMbJ+z7AzPxWkNc
XTuq3On3NjsUk7bOl4/W8t2JY9t9WP6ubh0tlj/3XbR/hR5fNJGtOm63il3O1fTs9okkkoGR
SFkN3UPHl+RFTOEtI8RCQ0Ki4iSk4Q4jwVTqVuRR07Jvxo9eqp1lciRLRuiPkrLA2VRv6Rj5
Ds02Odtz21ttaNINX0XN81m2fWJ7jjOtxrMfd6OQz9IIsptPpOLtv7pcPaULpvXeo576vWIx
sbLbbFoaGOqdUZ9m5zt+gO6QELCaLcf0voGPTZmWF1mPiOse5peX11OdLbtrBxO47kY5fSGd
Sx+lGoeo+lopeWgs2fSZVuPf2yB5LMq6Xbm3dYxa8y6rCvcLqa6g0MsGRXJdvLSTLh2Q8PoH
Ueo03W9QtuwbS3HbSxu2d+MwbLJ1Ih86AoeQT9XTxeo9UzZy8HHoOD6rqw17i26wNdsfYDG0
caA8oP1pyc+htbca51Tb6chvs+l6rGeqwg9tGkJquj9UowHYjs+rGoyHE3hrDuY6wzY2iwua
AHniRIUepN6F0rK+1Z2ReRVFrcUl1jGmwfZ/V2xPkdUdaV1aeEA29jMym+jpvVsY7K3ZH2hz
3tHrFxAJcyWaacq59Xrqf2pm14j6sjFyGMyRbjt2MrP822lzZI37RJ7+KQd0bonU+n42Hhtj
Orftyw4uLGtEsALt2j/JUx9Zb3dKuZZ6eLlvFd7bKQAPsttga60D9+sfS+9DZTvXYNjOr4mb
RWGs2XV5JENJ3hrmuPj7mpLOdbidF6pjsAuGLmkUDJuyQ+tz3De1wY9xd2iRASRv80PdpJJK
uzKSSSSU5OWzZe4eJn70BzQ5rmOEtcCCPI6K91FkOa/xEfcqSsRNxDDIUS5Gb9Xq7enU4tDv
02PUMeq+wnSvcxzpDeSNghXmYPTcW23LbTVTZZrddAaTPJJ8+6srM6zgfa7+nWGn7RXRkfp6
Tq01vaWlzm8ENMFKlJM3rvScA7Mi8NIAcWsBdta76LnbAYaexQHdeFrW1YtDm5ll7cYU5P6M
Nc5hta58btC0aQqmJ9W76zlU2FjcW+i3EbGrvT9Q2Y5/sbiIRs/BxPsWdk+q2+6uipuQB7g2
zGEts21uD2vjzS1Vo1eonI6x0HOqzPSZdSbK34jNZux3CwFj5DjLAqXUOm9YvGIKGOzsS6h7
cbKJHqMa9rbq675+lte0Q770bDtr6Rk2V2sr+z5DWZTs6sFzcd949Jjot3EtO33OJ550VyjA
NXWr8XJybcmzJxTZg5NjvoGDXc1jGQz84O4Q3Ts491DL68nFpyRuZSD00Na52y5h9aygPjY7
aQQ2HInTqsV7ujYvoYUXbXBmK4/aWtFfusudwWu4e0hW7LOp/srH6ZTXlYefiMFe2pjW47nN
gC597tBXpJ7omL0ro7KK+nZBqsOZfa/Cy8XRzHD9IWi5vDwZjyQpTLrPSeg9KxbuoDGrbY+s
4lLH61h1xgGHTtjy7JLQxrTlXZnSc4B1mPBpsIlz6bGwy2T+eDIJ8Uk6gi3r0kklXZlJJJJK
a+azfQT3bqstbT9ux27iDKxnRJjUKbHsxz3WVPqPV+n9MaHZluyWl4a1rnu2jQuhgOnmqv1l
DxhUvBsNdd7HZFVe6LKeLGvLeBGqx8OstyMo9MuDsb0XhgtY4j7E9ziXN9QsP6N+4DxCcSVo
dB/1nFma7Fxqw6sWfZze07nscQItNe3b6YJHLpKrnpJ/b2RZiX+nkZdIs+01jdU62r9FfTfW
PaQ7QxyEDodfRPsVBy7LDc11QvaBYKXPn9WdftbsD9u3krqmGoNcagCNx3iuPpz7p4E+KXmn
yeb6N9Wr9wf12qq1tVLcamkPL2FrHvc0lugPtcAJVluT0rBouowg7My+ibnNosJ9Rlbv5wVu
P0mtaq3WLetO6eMTIoYzIbkN+zZ7ngMc8Pmgsqp3v3OGh3ABVXUfauoXvysk9PyDlA4tdTBZ
aMg0s9YOczfNTfzvzfNDyV5un9ZXCzAxOq1NGXiY7m2XY73EVWVWgAPftn6BIdqFVq6RnB1+
LfQ2p2Xc3LxM7C1ootraNk1mC2QNT+cpdNxaMfplNuTm25uGG2HHorrdVjbfdua4uH0eY9Rw
atC23rleTXdg0V3dOFFZ+zBzGvLifc2uzdEtbET7T4peavJr2V9bq6lTk2Nouz8ip2PUGB7c
eutv6V77XauJceAktuz1H4z9k12OYY3alriNJ2zx5JI0i3//2Q0KZW5kc3RyZWFtDWVuZG9i
ag0xNyAwIG9iag08PC9CaXRzUGVyQ29tcG9uZW50IDgvQ29sb3JTcGFjZSA2MDIgMCBSL0Zp
bHRlci9EQ1REZWNvZGUvSGVpZ2h0IDEyNi9MZW5ndGggMzc4Ny9TdWJ0eXBlL0ltYWdlL1R5
cGUvWE9iamVjdC9XaWR0aCAxMjA+PnN0cmVhbQ0K/9j/7gAOQWRvYmUAZIAAAAAB/9sAhAAM
CAgICQgMCQkMEQsKCxEVDwwMDxUYExMVExMYFxIUFBQUEhcXGxweHBsXJCQnJyQkNTMzMzU7
Ozs7Ozs7Ozs7AQ0LCw0ODRAODhAUDg8OFBQQEREQFB0UFBUUFB0lGhcXFxcaJSAjHh4eIyAo
KCUlKCgyMjAyMjs7Ozs7Ozs7Ozv/wAARCAB+AHgDASIAAhEBAxEB/8QBPwAAAQUBAQEBAQEA
AAAAAAAAAwABAgQFBgcICQoLAQABBQEBAQEBAQAAAAAAAAABAAIDBAUGBwgJCgsQAAEEAQMC
BAIFBwYIBQMMMwEAAhEDBCESMQVBUWETInGBMgYUkaGxQiMkFVLBYjM0coLRQwclklPw4fFj
czUWorKDJkSTVGRFwqN0NhfSVeJl8rOEw9N14/NGJ5SkhbSVxNTk9KW1xdXl9VZmdoaWprbG
1ub2N0dXZ3eHl6e3x9fn9xEAAgIBAgQEAwQFBgcHBgU1AQACEQMhMRIEQVFhcSITBTKBkRSh
sUIjwVLR8DMkYuFygpJDUxVjczTxJQYWorKDByY1wtJEk1SjF2RFVTZ0ZeLys4TD03Xj80aU
pIW0lcTU5PSltcXV5fVWZnaGlqa2xtbm9ic3R1dnd4eXp7fH/9oADAMBAAIRAxEAPwD1VJJJ
JSkkkklKWXm17LieztQtRVs6rfVuHLPyJ+M1LzWzFhybqKcip1N7BZU/RzHagwZVXrDsCvBN
vUKBkY1bmF4LQ4Nk7fUM9mzqrqjdVXfU+i5u+q1pY9p7tcIIUzE49/1jxWNqp6awWOdbVRLw
aq2MsO1lvHuYYgFvdVcjqFtmTj42WPVzKch2Nm4LAS23Hs1bkBng3R0/EK5V9XmXYuNT1B3q
PxGPx91Zj1KJ/Rh/eW7QdO62A0SCB7ojd3j4oUU6NDCwrq+oZOcQKWZjWi7HkO/SVktbZuGn
uZyFAHpPQ8UvprFeO65td76/cGOcdodYZ0A48lU6h9Y2DCZfgOJzK7i1/Tyzdc8VmLay0SW6
ahyycTCu6hmdQd0h1VdL3m211hLq8irJYLG0vqHEGffyEL7Jru7H1pozm9MzMnGzDUz0SyzG
e0PrcHe3ThzXa8yq46bm9Q6phjqOCasfHx3VZBZaHUWj2uqGkOOo1aQjYHSs5uHUzruW12PQ
AxuK0xWRPs9ew62EaAcBP1Pq+I7Iyem54vwsWl1bbcxhAYQ8bgx7m+6truJS8SpXq4fT6m4X
Q3MDsrKNA3EvppsLS9+1s9gPog8pIeL06ljT0G1ps6c4faOlZdXLADu2eo3h7CZa7uEkVPeJ
JJKuyqSSSSUpMQCCDwdCnSSU499ZqsLD24Q1pZ1G9nqN+k3n4LE6liW5eG+qi00ZAh9FoP0b
GHc3d4tnkKeMrFsUhRZ5WXj4lTrch4YGtc8NJG5wYNzto7rA6t1zMrsdNU4Ia1+RQ0EXfZbA
P0/qB3tdJhrRqYKrt6dldTwYIOY7IbZRnVZRk42W3/C1nlre0N7QtrD+r+BjWV3PDsi+prW1
PucXlgaPotJ5E6jdMI6lWgWw8IDq1nU8VvpVX1iq8PGtuwA03Vu54MGVexcHDww8YtLKRa4v
ftES4mdfmU+Xk1YeLblXkiqlpe8gSYHgFhZ/VrrMh2F1DDuqw7qf01TRvta1x9t9bqZ3AHRz
Rq0paBG62dm9SvzrME142b0zOa5uNXZuqc9zNLafU1G8RIkaqv0fpvUcnqYf1fDeKsWo0F17
mltoad2O9zWktsc0EtM/FanTsXNzun446uA4V6tY4Q9xY6abnHlj9o1C1L76qKn33uDKqxue
88AeJSrqVX0RU4+H03Fe3HrFOOzda6tgJA/Odtbr9wSWP1jJ6n67c/pmZYMGhoGUyuttrC12
vrVz/ObfzgCklfSlV1e8SSSVdmUkkkkpSSSSSlLMy8Y1O3N+g7jyWmoua17S1wkFOjLhKJCw
4oAEwAJ1MdykrORhvqO5vuZ4+CrKcEHUMRFPNZfSsnKz8zHyXOdmWD1en5J3Cl1EbX4tjG+0
efc8rW6d0luJY2+y63IvbWKqza7d6bNCWMIAnUcnVX0kKVavP5lc91jrDsqr0ul30vpsml1k
Nsa+552toduI2tLZc53hwtvOxK83DuxLHPYy5pYX1na4T3BWZjdCZkCt3VKKzfjj0HlgHpZN
Tf5t1lfYj8D5JG1Cmv8AVzHzbMNjWuOL00OJZjCd7HNdq2i2YdQ46idY0SXSU473AMqZDWgA
ACAAOySVDa1a7uykquf1LB6bSL825tNZO0OdOpPbRUP+eP1b/wC5zPud/cqpnEGjIDzLcx8t
nyR4seKc494wJH2h2UkzXNe0PaZa4SD5FOnMKklV6h1PB6bSLs20U1udtDnTqeY0Wf8A88fq
1/3OZ9zv7k0ziDRkB5lmx8tnyR4seLJOPeMCR9odpJUsDrHTOossfhZDbW1R6hEiJ8ZhW2PY
9ocxwc08FpkfgiCDqDbHPHOBMZxMCNxIUQyVe3Cqs1HtPlwrCScCRssIB3c53TrB9Egph0+/
vA+abL+snRcPM+xZGS1mRoCwzoTxJiFoFxPCbLmhHSwSOy6XLTgIynCUBMXEyFCQ7ju029O/
fePkjMxcdnbcfNFSUE+amdtECEQvMCBoPAJJklF7k7viK6nlP8Zf/JGP/wAf/wB9KF0zJ+ol
lGLRZXQ7Ke1jHA1mTYQBqY8UX/GX/wAkY/8Ax/8A30ovTOo/UurDxTY/EbkMrZucWDcHgCdd
vMp8v5+WsRpH5/2O7hv/AEXgqOeR9zLX3Y1/jaHRvfWX6x1dBx6mV1etk3+2irgADSTCrdK6
x9aH59NHVenCrHyZ221z7NJAdq78VlfXxxp6r0nqTgX4jCDI1Gjg/wDELpaPrR0TJyaMXGyR
ddkzsawExA3e7wTuInLIGfDwmPDHvbAcEYcjhnDlvflnjlllyniJgYnSq+Xh31bmd07C6hUK
c2lt9YO4NdxPiuCzek9Nr+vdHT2Y7BiODN1P5plhJXoy4TqH/wCUnG+DP+oKXMRFQNC+OIW/
BsuQS5iInIRjy2aQiJGhLTUDu6H1owh0joWRX0fBrbTkAjMc2QWsA0dyqX1AzOsfZ6cUYrT0
wusLssnUO5jnx8l0n1nY6z6v57WCXGl0AeWqwvqH1LBPRR0312tzXvt21fnaiZQlEDPHXhHD
oNuuzLiyyyfCc3FjGafvDilLilIAx/nDr+j9i9v1u6x1DPuxPq/hNvrx/p22HmDHiAJ7Lc6X
1XKv6Y7L6jjnDup3i6szHs/OE9lyP1K6thdJu6hhdSsGNabAd1mgJbILZWj9afrJiX/Vyx2C
8uGVYcZroIkN1eR5RoofflV8RvWwv5rkQeYhyuLluHHxYxHmPUTISFyJlsf7HmLen39X6f1P
6xOne28Fg/kz7v8ANBC9A+rPUf2j0TGyCZsDfTs/rM9pXM4HQPrhX0luHRfj14lzCTU7mLBJ
3e3nVS/xf5VmJmZvRMj22McXtb/KYdr4/BRR0I0PqGt92x8REeY5XNwZMeT7rMSxxxmzHDQg
Qfst7hNIBAnU8BOuU+swzD1/CZhXXNybKbBQ2uNrXEgbnbgYb+8nk0HD5Xl/fye3xCHplLiO
3pF6vVpLjMc9aZ9Y8nExs11149EZD31tNYra2XuPhqYbHKSHF4Hemz/oz1V7+P8Amve2lfDw
8W1bPXZ3T8LqFIozaW31A7g13iO6o/8ANL6t/wDcCr8f71rpLQMInUxB8w0YcxnxjhhlnCPa
MyB+CDIwcTKxvsuRS22iAPTcJEDhVcH6v9G6fb62HiMqt43iSR8C4mFopI8MSbIFjqgZssYm
AySEJfNESPCfMKVR/SenWZzeovx2uzGQG3GdwgQraSRAO4tbGco3wyMbHCeE1YO4WIDgWuEg
iCDwQs7G+r/RsLJ+14uIyrI1h7Z0nmBMBaSGTKizyAA0F9PBdDJkiJCM5RjMVIRJAkPHu5+b
9X+jZ9vrZeIy23gv1BPx2kSns6D0eyqml+JWasczSyIDSeeFfSVWh2ZBzGcCIGWdQ+UcZ9Pl
2W40CqM6T02vOd1BmOxuW6d1wncZEFXFh/WjO6lgMwb8Oyqqn7S1mS64kN2Oa4a7RxOqIFmm
OM5RvhkY8Q4ZUasdi7ijtrNm+B6gEbtN0LicrJ6rYyzqfWsfJ9H7O27Dd097q2VFhc5xeHOE
OcIPukRoov8AtOP1emxrK35juosL8wWg2OpuE/ZzT9IbW8/m6SE/2/Fbb2TXYNbzYw1tfkO2
lw2gve3tPciElxGdm2YuFksx8e2y7pHVnWBzWnYTc4hrGnuf0kmOEkvbTxG7s3VfTZ9DSSSV
xYpJJJJSkkkklMXHRRTu5TKnmlcz4aLgpJJMZg7ee08So1Lqj1jG6Xk4RZ1Us+yNeyx2921u
5jtzZPxHC5qj9p53Tc8v6hkUdQYLcfKrsgY5uHv247mCRDBHt118VCizpow8HMxqBS1l1Wbl
4LHm9rKXNdSLoEidQ4jlSCFdfsU6nXs76rwzI6jS7NbXWLGGut9tfpk6H2ezlWer5uJ08Y2d
Xh12ZuW9uPQ+zbXtL2l36S0g7QAP4LFoqyC+uyrFty+i15mRdTRU2C5x2updsdt/RB+6PPVb
2f0/L6z0B2HmCvHyr2NNjB+kra4OD9p8RpBSIAr+KnFu+tWc19mDb6NWV9qZSLcMHI9r6jc3
a130nuLduqSTejYGJmT1LKxMG3IbUMSnDHo7LKXO2WtLyZPu26iOySd6eyns0kklaWqSSSSU
pJJJJSM8pJHlJUJfMfNcpJJJBTns6F0xmcc9tX6cvNoBc4sFjhtdY2snaHEcmFax8PExd32a
llPqHc/02hsnxMIySJ4utqUsH63U0WYVQeHOuutbjY4NjmVB9xjfYGuaHbQJEreVLq1mC3EI
6lUx+E8xc60s9No7Of6jh38JKMdwp5ct6f0zNo+xn7T03Z9hzS+k3jfiiWV1kAw6wv8AhI8U
lrtzOoUXUDoeBTl9DFQg49lbHF7if5sOe1sNj3T4pKTXsp//2Q0KZW5kc3RyZWFtDWVuZG9i
ag0xOCAwIG9iag08PC9CaXRzUGVyQ29tcG9uZW50IDgvQ29sb3JTcGFjZSA2MDIgMCBSL0Zp
bHRlci9EQ1REZWNvZGUvSGVpZ2h0IDEyNi9MZW5ndGggMTU3NS9TdWJ0eXBlL0ltYWdlL1R5
cGUvWE9iamVjdC9XaWR0aCAxMjA+PnN0cmVhbQ0K/9j/7gAOQWRvYmUAZIAAAAAB/9sAhAAM
CAgICQgMCQkMEQsKCxEVDwwMDxUYExMVExMYFxIUFBQUEhcXGxweHBsXJCQnJyQkNTMzMzU7
Ozs7Ozs7Ozs7AQ0LCw0ODRAODhAUDg8OFBQQEREQFB0UFBUUFB0lGhcXFxcaJSAjHh4eIyAo
KCUlKCgyMjAyMjs7Ozs7Ozs7Ozv/wAARCAB+AHgDASIAAhEBAxEB/8QBPwAAAQUBAQEBAQEA
AAAAAAAAAwABAgQFBgcICQoLAQABBQEBAQEBAQAAAAAAAAABAAIDBAUGBwgJCgsQAAEEAQMC
BAIFBwYIBQMMMwEAAhEDBCESMQVBUWETInGBMgYUkaGxQiMkFVLBYjM0coLRQwclklPw4fFj
czUWorKDJkSTVGRFwqN0NhfSVeJl8rOEw9N14/NGJ5SkhbSVxNTk9KW1xdXl9VZmdoaWprbG
1ub2N0dXZ3eHl6e3x9fn9xEAAgIBAgQEAwQFBgcHBgU1AQACEQMhMRIEQVFhcSITBTKBkRSh
sUIjwVLR8DMkYuFygpJDUxVjczTxJQYWorKDByY1wtJEk1SjF2RFVTZ0ZeLys4TD03Xj80aU
pIW0lcTU5PSltcXV5fVWZnaGlqa2xtbm9ic3R1dnd4eXp7fH/9oADAMBAAIRAxEAPwD1VJJJ
JSkkkklKSSSSUjSSKSoHdcpJJJBTWzs/GwKRdkF21x2taxrnuc48ANYCVkD60vzTTV0jG9S+
8XPDcomgbMdwrf2cZLjAWp1dma/peUzAMZbqnCgzHuI0g9isOrpuR1DDZT+y68anCbWzBbmF
zbA7X1nO9B07eNJ93dPiBVlTU6h9Y+oVZDrnXnGc11L8XGY1t2O+g7RfZZewO0aS4EyIhHdV
i5WdnfVvJdYX32fb+n31yXVNeN3qtf8Am7LAQFdxfqhhswqMfJsc51TH02egTVXZVY82GlzA
T7JK22UUscHMra1zWisOAE7Bw2fBEyiNlPK9D+r9ltvVMbquK5gtrposuLnOFz697vtFbnEk
cg+RSXXJIcZu1JEkkldWqSSSSUpJJJJSM8pJ3cplRmKkR4rlJJJJqlJJJJKUkq2XmCjHfdVU
/Lew7fRohzi7w1IA85WHl9b6lZg9UptYOmdRwKm5VIDhY11X0hJgAyWljoThElTu5Wfh4ZpG
Vc2k5Fgqp3mNzyJDR56JLmuq9Twut9Poqsoe3Lx76LMnp1rSLRW8hjy0fnNh/wBJqSPBp4qe
xSSSV1apJJJJSkkkklMXqKm7hQVTOKn5rgpJVOrZzun9Nyc1rPUdRWXhkwCR4nw8VyvXs7qI
fXV1WqrKx8ZhybKqLHU15FVkVtdJJ1qedQTEGUyMbU72b9ZcLGy2YNLLMnKfYKIradjLHAkN
ssPtHHmhdIzes39XzK8+ygY2OythqpB2svf7tvqP1eQyJ0HKovusObiP6XjPzsfpbH0PrY8O
2ZNjGFjvUsIDw1pLS6dFaxfq3kPcy/OynfpbK8vLxKwPTOSwD3Nf9LbLRonVEBS+R9t6X19v
2PHN+N1lzfVgw2m6se+x3k+sfeFa6x9X8fqttVr7H0ljH027ImymyC6t09paCtVJN4tqUwFV
Yc1+0b2ja10ageEpKaSbakiSSS0FqkkkklKSSSSUpDKIoOGsqHmI3EHskI7a67a31WtD67Gl
r2nggiCFl4P1drxrmOvyH5dOPU6jFpta2GVPjc1zol+gA17LXSVYEhKOjHoxqhTj1tpqbwxg
DWj5BESSQUpJJJJTW6hn09PxH5Vwc5rIAYwS5znENa1o8SSknzsHG6hiWYeU3dTaIcASCI1B
aRqCDqEkdK8VNxJJJX1qkkkklKSSSSUpMRITpIEWCD1UjSTuEFMqMgQSD0XKSSSQUpJJJJSk
kkklJEkkloLVJJJJKUkkkkpSSSSSlnCQoIig4d1BnhfqH1SFkkklWSpJJJJSkkkklJEkkloL
VJJJJKUkkkkpSSSSSlJk6SSkZEFJTIlQVPLj4T4HZcCpJJJRqUkkkkpIkkktBapJJJJSkkkk
lKSSSSUpJJJJSlFwlSSTZiJFS2UjSTuj5plSkKNWD5LlJJJIKf/ZDQplbmRzdHJlYW0NZW5k
b2JqDTE5IDAgb2JqDTw8L0JpdHNQZXJDb21wb25lbnQgOC9Db2xvclNwYWNlIDU5OCAwIFIv
RmlsdGVyL0ZsYXRlRGVjb2RlL0hlaWdodCAxMjYvTGVuZ3RoIDM1MC9TdWJ0eXBlL0ltYWdl
L1R5cGUvWE9iamVjdC9XaWR0aCAxMjA+PnN0cmVhbQ0KaN7s1FdTwkAUhuEjqMESxF4QEFlB
RJrSLNiDKGDvvf//n2AScBy9hJlzdOZ7rjabi3eSLUQc2hzO9p+IR0enJtIl168wCYXZuuav
dop0yeXQRLrU1a2JdM3jpIl0qadXF+mSu0/zSHTJ3a97JLo0MGh/MXuXhoadukSXRkbHdIku
jU94NRIx6ZXpkosAAAAAAAAAAAAAAAAAAAAA4F/z+WWygSmRbnA6JNNVM+FgM1rsRmajc0qp
WEN92HiuD79fWhPWkz3RYjes5uOhZrS8vgmR9U2mZPZVemHxz14tmWzia/vm8nxZf2EpGkjb
w+zyCl93tbgWL65bd9vG5tY2X3dHGaVUwRzslgPFPb7ufqVaOzi09iAlj45ZuyW7S3Ryytg9
i1VrlXP+7sVl+er6xncbITLUHeP5vX94fKLnlxzR6xvn7ZZ5/zC3lOEzj3K+RgAAAABMPgUY
AAqJOF0NCmVuZHN0cmVhbQ1lbmRvYmoNMjAgMCBvYmoNPDwvQml0c1BlckNvbXBvbmVudCA4
L0NvbG9yU3BhY2UgNjAyIDAgUi9GaWx0ZXIvRENURGVjb2RlL0hlaWdodCAxMjYvTGVuZ3Ro
IDExMTAvU3VidHlwZS9JbWFnZS9UeXBlL1hPYmplY3QvV2lkdGggMTIwPj5zdHJlYW0NCv/Y
/+4ADkFkb2JlAGSAAAAAAf/bAIQADAgICAkIDAkJDBELCgsRFQ8MDA8VGBMTFRMTGBcSFBQU
FBIXFxscHhwbFyQkJyckJDUzMzM1Ozs7Ozs7Ozs7OwENCwsNDg0QDg4QFA4PDhQUEBEREBQd
FBQVFBQdJRoXFxcXGiUgIx4eHiMgKCglJSgoMjIwMjI7Ozs7Ozs7Ozs7/8AAEQgAfgB4AwEi
AAIRAQMRAf/EAT8AAAEFAQEBAQEBAAAAAAAAAAMAAQIEBQYHCAkKCwEAAQUBAQEBAQEAAAAA
AAAAAQACAwQFBgcICQoLEAABBAEDAgQCBQcGCAUDDDMBAAIRAwQhEjEFQVFhEyJxgTIGFJGh
sUIjJBVSwWIzNHKC0UMHJZJT8OHxY3M1FqKygyZEk1RkRcKjdDYX0lXiZfKzhMPTdePzRieU
pIW0lcTU5PSltcXV5fVWZnaGlqa2xtbm9jdHV2d3h5ent8fX5/cRAAICAQIEBAMEBQYHBwYF
NQEAAhEDITESBEFRYXEiEwUygZEUobFCI8FS0fAzJGLhcoKSQ1MVY3M08SUGFqKygwcmNcLS
RJNUoxdkRVU2dGXi8rOEw9N14/NGlKSFtJXE1OT0pbXF1eX1VmZ2hpamtsbW5vYnN0dXZ3eH
l6e3x//aAAwDAQACEQMRAD8A9VSSSSUpJJJJSkkkklKSSSSUpJJJJSkkkklKSSSSUpJJJJSk
kkklKSSSSUpJJJJSkkkklKSSSSUpJJJJSkkkklKSSSSUpJJJJSkkkklKSSSSUpJJJJSkkkkl
KSSSSUpJJJJSkkkklKSSSSUpJJJJSkkkklKSSSSUpJJJJSkkkklKSSSSUpJJJJSkkkklKSSS
SUpJJJJSkkkklKSSSSUpJJJJSkkkklKSSSSUpJJJJSkkkklKSSSSUpJJJJSkkkklKSSTOc1o
lxAHmkpdMqtvUGN0rG4+J4VO3Itt+k7Tw7J4xk76LTMDxdC3Mpr77j4BJZSSf7Ypbxl3Ekkl
CyKSSSSUpJJJJSkkkklKTOcGiXGB4lAvzK6tB7neAVC2+y0y46dh2T4wJ8AtMgG3dntGlQk/
vFUrLbLDLySoJKURA2YzIlSSSSKFJJJJKdxJJJVmdSSSSSlJJKLy4NJa3cew4/KkpT3srbue
YCz8jNe+Ws9rfxKhlHIL5uBHgOyApYxiNyCWORJ6FShdayip91k7K2lzoBcYHgBqVNOOdFIs
cejrlzs+ijLxvslGcCML1Hj13Fo3F1lX5jSOFrrlOpt6c6/NpY5tZA35+TdufmH3e2rFrtDY
Hg5ungujwL8i/GbZkYz8Szj0rHNe7aPokurJGoQF9UlsKF+RRjVOuyLG1VMEue8wApod/wBm
2D7Ts2bmx6kbd0+36Wkzwihy6frA6+yi+rFd+ysh/o15rztc6xxhm2o67Ce5SWV1CvprsoDD
tsrq/SuDotd+kE+ozCbaG0B511BPkkhqnR//2Q0KZW5kc3RyZWFtDWVuZG9iag0yMSAwIG9i
ag08PC9CaXRzUGVyQ29tcG9uZW50IDgvQ29sb3JTcGFjZSA2MDIgMCBSL0ZpbHRlci9EQ1RE
ZWNvZGUvSGVpZ2h0IDEyNi9MZW5ndGggNjA2MC9TdWJ0eXBlL0ltYWdlL1R5cGUvWE9iamVj
dC9XaWR0aCAxMjA+PnN0cmVhbQ0K/9j/7gAOQWRvYmUAZIAAAAAB/9sAhAAMCAgICQgMCQkM
EQsKCxEVDwwMDxUYExMVExMYFxIUFBQUEhcXGxweHBsXJCQnJyQkNTMzMzU7Ozs7Ozs7Ozs7
AQ0LCw0ODRAODhAUDg8OFBQQEREQFB0UFBUUFB0lGhcXFxcaJSAjHh4eIyAoKCUlKCgyMjAy
Mjs7Ozs7Ozs7Ozv/wAARCAB+AHgDASIAAhEBAxEB/8QBPwAAAQUBAQEBAQEAAAAAAAAAAwAB
AgQFBgcICQoLAQABBQEBAQEBAQAAAAAAAAABAAIDBAUGBwgJCgsQAAEEAQMCBAIFBwYIBQMM
MwEAAhEDBCESMQVBUWETInGBMgYUkaGxQiMkFVLBYjM0coLRQwclklPw4fFjczUWorKDJkST
VGRFwqN0NhfSVeJl8rOEw9N14/NGJ5SkhbSVxNTk9KW1xdXl9VZmdoaWprbG1ub2N0dXZ3eH
l6e3x9fn9xEAAgIBAgQEAwQFBgcHBgU1AQACEQMhMRIEQVFhcSITBTKBkRShsUIjwVLR8DMk
YuFygpJDUxVjczTxJQYWorKDByY1wtJEk1SjF2RFVTZ0ZeLys4TD03Xj80aUpIW0lcTU5PSl
tcXV5fVWZnaGlqa2xtbm9ic3R1dnd4eXp7fH/9oADAMBAAIRAxEAPwD1VJJJJSkkkxIAk6Ac
pKWssbW0ucYAWXkZDrna6NHAT5WQbn6fQHAQFNCFandilK9Oikkkk9apJJVs/Pqwamveyy19
jtlNNTS573n80eHxKSmPU8GrMoAfSMl1R31UPcW1vePo+pHIHmsbpuRZj9Vutdk1312/8pWM
YK8ah7BsqrqsJ9zuxC1Ol9Usy7b8XLpGNnY211uO14shj9WHc3v4rLzOlZrMg5GbVT1WlzSK
sd7m0Y1FjnaH03fS3A/S1dKB7hI7PSLNv+sPTqckY4LrocGX3Vt3VUk6D1bOBrohVdQx+iYm
Ph9VvDLGCuqu1xk2ud+40S+GnSSh9cwGuAqey7IxH/Q6djAU1usHudZkXCIb31/FIlVOl1DC
qy6dr6WXvqPqUV2kiv1B9EvjskqvRc9+Ri1Uus+2XVSzKyq9ag8agB5jf4S1JLTdXg9ekqTO
oa+9vzCtV2MsEtMqsJA7M1M1Uz7trBWOXc/BW1lZb997vLQfJSYxZ8lszQ80CSSSmYlJKtn5
zMGkWGt91j3BlNNQl73nho7D4lVeldXsyMi7p+e2qjqOPtc+qqwPbtfJaAdPc0D3BK006ajb
X6lT697q94Ld7DDhPdp8VDLyHY+O+5tT8hzfo01CXOJ0AE/lWThdbyGdTd0/qj6G22t3sbSS
RSSQG0WPOjnu5CVqaNtQ6dnVDGxmtvoL3YmHUfUyclzhtdbk2/m1nn3FbHSsq/qvT/Xy6amC
wzV6Z9Runf3j6THBT6xhZGXg3U4lrMa24Bttzmkn0gfe2WwdQqLc9nRsSvJzMyq7AdV+iZUw
VwGD2NoqbLnyOSShsfBW7l5dTOldRfnZeM69uOR6GRk2t3X2kT6mm5x28Na1sDlF6Xm0/WsZ
Tcmt1WVjtgUMe84zmun0jaPoucDyFo9Qw8brfTaOpV4huyBV6mLj3H092/UMt/k94WC3rud0
sV9O6dVj25Vln6dzd1zn2fnBuwNaXdg1ujfFDY+Cd/NudMZ1WvMrsNdzaOnjZl5FgDQWtafU
oqqq9tg3e5rgBHCSu5+Z6/TH9WxLLsYOGzMqqYXZJew7G0jkVkOPuMJJeH1U2uu9RzcQV1Y4
9Ft0NGTHqWF54qx6R9Kw+J0CB9V+p5FVtnTrgRl1Oc+xjX+s6tp13ZNsxvefzRwtfMwqc2n0
rZbBltjDtew8Sx35pjRYuLhnHyrMymmjCq6a11bMQPDXPFkE25VuoGg3NCpDZne0x8ltwjh4
5CzbP5x3xKq9O6jVnMdkYosFLXba7nNLW2R+dXOpb5qw4kkk8lWMErJB3Y8g2R3uubS91DBZ
cGk11uO0Od2Bd2XNNzuodPy7sp11mfVjgu6wSWsordA2VYocJ3M7idfiuoWd1nAdfjG+lpsy
MVrrMagx6bro9r3M/Oc382e6mLGG/pbToXNba3Rw9rgHDkeBXM9Qob0uxjmVsbXgh+Vg4zJd
Ze9gAtvybomGh07e6B07qGfg5Gxjruoeux4qFrnB91sghzqrNahWJ3n6Pgt+zGwOq4mOzO9K
97272+k4tBMbXmsgh23sUt1bM+n9SGRjtfk7Me4vNQbu9r3Dh1W6C5ruyyurYdeGK6GMAwyX
XY+FUCDfk1NdfORadYlugHKiMenH3dU6na2vqOC4V1Nc0upprdo2nHYI3lzO+plXem5TfrFi
ZP23A9PEbca6WWnc54by4gfRIOmiW+ikvS+q2ZGD9qztterdtzARXY2wNc1zAZP50FZ31g6c
ynIGcWU/ZnHdmW5D3SS2PSora0OOwnUtbynczH6XN+VdYc9rhThsrYINYh3pYlEkBsaOeVc6
Tfkdd6bdZ1LFZVj3WObRW1xcXVDTcXaaz3CW+nVPi5HS/rZ1C7OtsymNd0yotrtdSyPQLjDX
2uLjA/k9u62r/q9052+7GaMbMc8W15bNXseONs6bfFvBVDq12B026yvp+G7IymYpbfh1DbQM
c/Rffp+brEalW+k5GU5junZVjS51Itw8vGbtrdS4R7JmHV8aoDsdVHuNEWFfV0zqD+mZNluV
n9Rcci2+pgDASAz6DCTWAByUkB2V0/pmPnYdNL2WtuqoJZaBmXutDf0rXP1J10SS8FO47Nqo
r3ZzmYh3FjBa9vuAMNcP6yr9Z6dg5OO6/Mqdk147H2HFE7LXBvt3sb9OO0rm+p9Ow8DrDaPT
fl0P9O+4WA25D7Z21Y9dtnaxw3O8AF0mN1PMGVVi9SxRiW5IccZzLBaxxaNxY4wIcBr4KlXU
M7h9MqZhV4mNg+vldWa1r8qllzhjVb/dtv3bmtDQYDRqusM6ErLpqxugtzLrbWVdNsf6zGwd
7bX/AE2iNXbj9EcqpTldSrz3dWtp+y9JyttVlV74taR9DJLTowHgt5T8cqmD0WyFineSSVHq
t2e2tuPgNDLbp35j/wCaoY0e6x08u/dCuMDLKxrK7n5+HW2zLLCx9ZgG0AexnqO+gAddFy+J
l4uJ1TM6vnvdm5mE048Ut9jXHWxrJhrGN+g3u4ytvovWX3lmNlbnutc9uDllmxuTXWBNgbJg
/lQvrN0l2dRTfjlz6sazffjUkAvZ/hDXGnqx3Py1TTrqFw7FhjdQx/rLiO9AMxOr0Md6LbZf
6Jf7S9sQHEDmPolYuYM/07Ka8m2rF6QaQ9kGhrtz9ofsZ7vTB1JcZct7B6bijBZbVcz7Bij1
+l5LpZZS0g767TpLAeZ+aqVWM69jZGQx9uHmOx/TzseusPGRRrssqbbGjtdjkj+Km+6q7rGJ
mYl7m42dju+z3ZVDd4NbgLD6ZdqBY3kLnrqc6++q9111FeDmU4rK73HaxzhLbLWVFrA0aAMH
jqVazLeo0H7R1A3dPdXW1/SKaJtZ6jRHp5Owe+xw0M6RwtPqHSrMnHOY1lwuyxS/L6dW5obZ
Y3aW7nP+ht/OI7Jbq2S0+tnCvqcelnYFluPkNqG5tzGGH1tmJDuWzwVkZWVl4trKcu5vQscU
uyOm49bgW72Oksynec/RGing9Rrr6jf1nq3UmNpoa+quioxSXTNjmVt1LWnTc76RWyz9nONv
1hss3412OwM9RujKmkv0a4TLiUt1bIspt2fgYPVMbGAywarn1w0Wmo62VMe8aTKSdvWc8WY9
l+EMfEy7W00te/8AWTu+i81AQB4iZASR0Q3Op4T8ymp+O9teTjWNvxrHDc3e0EQ4fuuBhYmN
j9cf1OzHnHruqf8Aag9265mN6wLNlUlpcbNTro1aPU8+7BxmZDLmMqvspZQ17duxp+nun+Sn
NWN1S52b0rNfj5DQKbbqmhwewatDm2CDHYhZ4mL4ereny2SOMZaJxkkcQB0IrQ9t6T9Myr8h
+TiZzWOycGxrXvrHscHN3se0OnaY5Cx+t0W4j6er9TyW5ltN00dNA/ROYdNtVZkutA924oNB
sZXhnAyL8WjMsyRZkO22XW5lc7PX3DhwYfaIWrmYV/VekUW2Y7GZ5Ywvrf7TtJDrad+pYHgQ
U7YsK/R/rBj9Se+t2ym4kmmkEuJY3xfGwu8Q0mFp21VXVOpuaLKrBtex2oIPYrnWW9Wu6u2m
vDqP7NbNeJW8MooNjYHqW7fc8t4a0QO62+n5zc2l7iw03UvNWRS4glljeRI0IgyCrOGdjhP0
YpxrUON1zEdj2Ove9/pZLXVWZLWz9mxgB+gx2N4fadNyXQX5GDlDBzGnHrdj+piUbw4U0sdH
6fj9I4u1d34XRLIysO3DGXZjYzc6zOc0H1TuO8nm1x0FNY7BS1ray+ja6l0+jM9M5L3OxMeb
bcRoltpHubvA1cBzt7rnMvqOfmPp6nF2Pj3MI6K3FAscbmSdmUxvO8D6PDfio9L6tidJpzep
W229Tzc20NDKtS7Z7GfyWb3TtbzCu5FGBk4OV1TptNlHUqp9WmXCyh74ba4UztFmyYcBqgdU
7O4eoNpwX5ORDbKafVyaWODnNIbLmwD46LHsz+pV3Y1l+W37RkubY7ptbWuqqxebH22RukN/
OmJ4CC9nQfVwcboLa7sw2tLn1y4ij/DnJd3Dm6Q7urGfj3dIOVZ03ELMbIx9tbscMb6dzSTv
tc/82PkPBK1KGB0F1buqepU/pNA31Y9LA2oOby6wN91jp4B+5EuzcvK9HG6hhMpwupONNdJs
P2kDaXB7mNG1oEdjoqV5pw6hiZN1ecepuqtyyH7Ly+zaxj8etg2lrYlA6qyrHvzGPyLv2hUa
xjue4uuy63j3Us2NGxpdp7PmlakuZZiYGTnNyA/LzmelTiDIud69tdoG/wBAtADI8W+GqSk9
+JkYjui4+QMq0WRj75jYwh9mEcrX3xI0Mwkkp1qG9J6tlfbmWHKOO3YKXghrCdd3pvAMuHcr
OblZl9AzW5hxrbi8YOGxo9I+mf5uzT6ToVrpDTj4Q6t1V7qbq6TQ+y6GE0Vvcan2N7PIKr2H
o+U+3M6ZU67PqHr14lgfU1549YVWAbo8lnTj1j9XW5PmI3wZTZ9McdiMoga+n1aREiRZ/i3K
sHpTbW9Tvr9HLYwZV1G9xax5bDrPRBjd5wq2T9bq9thwMS3INZY3db+gDjaYrDGv97t3bRXO
i00sw351Tzm5V4Lr7eHueP8ABwfoxxCxer5GRmdUw8ttbcJ2K441l14DzjW2iWWv26OEaM7B
x1Toyur3OzBnw8M8nALjjNS6UdvlOvDegJbnX8PMopzc3EtZVXkNrfltJd6lV1cbLaiz6TuB
tPKfGu6ng5OOLxQy/qdwdbgsa51xlsPvfZugbYEiNvZVcfBZ0yi27Pd6IY409WN5c+vNY+Sy
6vk+p5D4KzbThsxnN6Njt25lO+7qdz3CuuofvWl28ubH0R808Gv4td6EiExAIIOoOhCxOhdV
wPQoxK8jJzGvca68/IHttsGpa13PHEhbatY8nEKPzBhnGvJx8vpRxXtyunY7bbqgKsHFhrKK
HP0feQOT4nnsFnWDE6X1XFx8a31ut5D/ANdzrXEVw/WLgNJMfomLqVmdS6XvwMjF6fRSH51k
3vs1ALvpXEcuc381PIWgpsvLoxcbOswmV2ZOM3dbUwDdvIlvqbdfNc96nTLcimt2b9pssBd1
TOfYW1GtzS00Vs41J0AGnxVzCxbas6rp/RMl7MTEM9UyHNbZ6tvJbvcNzrD+cZhoTdVY3qbn
MxyOmdR6dvdc5wm4Y5BJNQbo5tkc9vigUrY1vTaQ7Lxsq3rOS4fYsNjA3czZrsa5rQG7eXPK
tM6R1Z3SHUZOab88vbbW93DNrg70RY0BxBiC5ZTc2zGyK6cK22kONR6Xg1MBqtx3BrrbbnQS
TqdxJkLewOtYubk247Hh0H9C6HN3DnaWvAIcPxGqQpRcsOawdSzM30MR1d1DfSYx11NFw1ba
6A3c528TtSWvkdFwMjK+1WNfv3NsfW17hXY+v6Dn1gw4jskjRRYcPqnWL8pmJccR2R02jLrH
2hpG3Iez2O9h4bv1YToSFZ6z1imv7NnCi6rqVfqsxKbmxtY+G2ZF7WbiKmcp8qrOGPi4vUmY
+F0vHtpbY6hxebS1wFNbGRLGl0TKr2578Drefe0PtuIOPY3ILXGy53vxqqGs922Cdw+9Umw2
s3Ax8rKxW1ZTbMksFt9Fb3V12sdDXXD0z7STx4qOTiMfkO6R0k7KiD+0i4Cxm09nufJLz8Vg
4mGyqtuTlYz7MH7V9nvxmTXknKdxbsB0bWTFdc6crocXqORjdOFN5GP1HIe/7MclpaXs3bK7
LywFoeR4nVRyxjcfWt/o3MPO5KjjmRKMRwwE/wCbBl+lMHQ8PRodT+yF1eRiZxyeo4t9NXTM
dwPp1bnCva5h+kSJlx18EZzcT7BnY+f1DDxX5eQ25lFb91DHNLfad0SLHN9wTZT8XBy6enh7
7cgPGVnXNG66ywfQY3w/gFX6Lj49/UPVy6gzHuN+T07pwALGGsjfbJ+kSToOAeEoZL0PzDsr
muTOOMcuMSOGdUZ767Hp81EjTZe6yyrMdffk0Ym7IIyM4VfoMeyiuGNra8/SeH/Sd8F0nSMm
/M6ZRk5Ai2xpJIBbuEkNftOo3DWFy932TOwsrOyjYXWmsdNzn07LLLjJFfpM9joI2hxCs9Nz
sujLbf1C3M9b05/Y9e7Icwcepe6O8e0BSajUaENJ6lJQxsmjLoZkY799T/ouH4gjsR3CK5hb
BPB4KtY8gmKOkgxThXk0svBturZRjXnCpLi680tAe4HUhrvzZPJ5WBdlDpedZhdM6dU3qLor
xzkPe+7Ia7U2B2vsH50nRdUsrrXT8lw+39MbWOpV7fe9oc81Nncyou9rXGfmnkLQ5d1hx8+t
vTba8ewAs6kzHx/funWyr1R762n6QbxytajozXm7Jysp2XkZIZtyAGsDBXJrNYZ4EzKjg4dl
+TjZ+ZmWX211ufjYz620lm8bXuewak9vBHcD05xsYCcF5mxg19Fx/Pb/ACD3HZIBSXEybHud
jZMNyqhLo4e3tYzyPfwKSfKxvtDGWUvDL6/dRcNRr2Pi13dJFTiN6vjW3XY/UMyrqHS31k3X
+lsrrsLh6dTHD6ZcOI10Q3dIwMl4yejUUZ1IqspLLbHNdVdZzc/fLi7bp4+CtZDPQ6x0Vt9h
ymmu5lD7A1sXENLbXD2sLg3SPpeAQRb1d3U766aW19Uc1tWTfWWOpbQ0l1eQa3Pb73fR2l0g
Kj5Nhj1TJxunY+N0+2t12XhNryxe8+lXZbWNodJk2On80aoFV+d1G3BwevvdguNf65SbGMbk
WFwdQ2tglx493C0upfYXY+EfrN6db2ZEUBhean2x7HaCQfAHug9VDX9SsszSyq9tN1XSKnal
zvTJsvc5gdBjRrefJJSuo9QpyW3/ALPoNf2mxuG/qu0BheTs2t/OcJ9u4KxV9VemupYM2cy5
jdrbS4sDQBG2vYRtasLozOo4+LgZXUrH5tDHlnTsFgaxj7tv6Oxtr9jA0idof381qdDf1Jjb
crHrFmBdbAwK3GaXSfVfXbfsa4TyGmPApnDDisEX01bIyc17Jx1L2/mkeHpQq5fu9gt1TGym
9MNXUshuNhviijp2BU173HitjLLQTu8wBCp05fWunZV2FTg3tzc99eRi22OrsNgra1ltd9jd
AABMjhbvWq99uA6m1ledXeXYbLQ412O2HexxaDtlnBQd9x6n067Mra3Ncy1gxmOLmtafpWMe
4BpIH0hzCfejWb+BhNw23AOLjkXPyHzwHWRLRHYK/S5h/RWfQdwfA+KEkhEy4hW6jVasrqH0
uh3HY+KGtFhnHjJG1v5rjz/eqFgYHEMdub2Oo/KrsJEjUEFgkANjbXysVmS0SSy1h3VXN+kx
3iP4juoY+U82HFygGZIEiPoWN/eZP4jsrKrZ4xXUtbkuLZcBS5s+oH9jXtkynIRa9Nd49Pcf
j6BP/os/h8Ekeg5AY+vMa07NPWEbLG+Jb+afEcJJKf/ZDQplbmRzdHJlYW0NZW5kb2JqDTIy
IDAgb2JqDTw8L0JpdHNQZXJDb21wb25lbnQgOC9Db2xvclNwYWNlIDYwMiAwIFIvRmlsdGVy
L0RDVERlY29kZS9IZWlnaHQgMTI2L0xlbmd0aCA0ODU1L1N1YnR5cGUvSW1hZ2UvVHlwZS9Y
T2JqZWN0L1dpZHRoIDEyMD4+c3RyZWFtDQr/2P/uAA5BZG9iZQBkgAAAAAH/2wCEAAwICAgJ
CAwJCQwRCwoLERUPDAwPFRgTExUTExgXEhQUFBQSFxcbHB4cGxckJCcnJCQ1MzMzNTs7Ozs7
Ozs7OzsBDQsLDQ4NEA4OEBQODw4UFBARERAUHRQUFRQUHSUaFxcXFxolICMeHh4jICgoJSUo
KDIyMDIyOzs7Ozs7Ozs7O//AABEIAH4AeAMBIgACEQEDEQH/xAE/AAABBQEBAQEBAQAAAAAA
AAADAAECBAUGBwgJCgsBAAEFAQEBAQEBAAAAAAAAAAEAAgMEBQYHCAkKCxAAAQQBAwIEAgUH
BggFAwwzAQACEQMEIRIxBUFRYRMicYEyBhSRobFCIyQVUsFiMzRygtFDByWSU/Dh8WNzNRai
soMmRJNUZEXCo3Q2F9JV4mXys4TD03Xj80YnlKSFtJXE1OT0pbXF1eX1VmZ2hpamtsbW5vY3
R1dnd4eXp7fH1+f3EQACAgECBAQDBAUGBwcGBTUBAAIRAyExEgRBUWFxIhMFMoGRFKGxQiPB
UtHwMyRi4XKCkkNTFWNzNPElBhaisoMHJjXC0kSTVKMXZEVVNnRl4vKzhMPTdePzRpSkhbSV
xNTk9KW1xdXl9VZmdoaWprbG1ub2JzdHV2d3h5ent8f/2gAMAwEAAhEDEQA/ANnKs6jkYQu6
lVjZNFmy2zpQaTcyp5Aa5r5lz2zPCHf06t9ed03pNmLZh21hr6XOLnYztfUsY0SXl3PPKo9b
xcjHe6vHyLcpvSq97rWta23Hqs9u1107rIZJDY8yj/tPEwuoY+Rj4px8KvGdR099w9Blg0fY
+x79YAHtESdSolzq3ZmRdbRg4N5opqx235mbY33sriGANfoHOiTPAVP7eczAwH5L7MfJbYL6
M30SaCS51dRt4H6Rp4UHluTgVdV69iPYMgH13YxeK2Y4O6n7SzdL29zpopU0ZGdd0+3qG04V
DIOQLgKMpxIOOWVMgaRPuSU1rcSnC6rdZ1Vrs+5v6ziUis7L8m0bXua0S0bGtDdeOVXqv6u/
ouPXaasfpVtwxHCA+68WvLXGnfLGsaTDZGoC7Zw3Ncx3DgQ4eR0K53L6Bh010ty7cm7Fxhtx
LBBGIQQ5r9rRLjp9I8BAFSPped1ap1eNjYz3YmIfQfjWunLY0CWPu3QPcB7dunZX7hjGl9zS
X9Nyj+sAaOpsn+dA5EO+kOx1SxandNvtzcm85tebsNmdAG0MEMBaz2+nryPmrd+PYx5y8MB7
nj9PR+bc2OR23xwe/dJS+Bk2WNfj5BByseBYRw9p+ha3ycPxVtYLnfZzTk4hL6mktx50IB+n
iWTx/Ing6LaouqyKWXVHdXYJaf7/ADCBUnqtdU8Ob2V97KsuoOGh7HwPgs1Fx73Uvnlp5CdC
ZiUEWjtqfU7a4KC13sqya/EHg9ws2+h9Lodx2KuQmJebDKNNLKxTa5t1LvSyqxFdnII7seO7
SkrCSctcTL6L1K77bjVW0sxc+77RZY4ONhAa2KSBptlvPguc6hj5WZkW/tLHty8rHLMShodu
ouybHAu2N9oDGMH0fxXRYtudXu6d0+6pmN03bS/KzJJfY4b21iCIDWkCVO/qXTsnFpo6xOFl
F5cGAuBY+t2wWssaPa0n6LiqILZcvDDzVk5fXX25XT+mvNNOHsl1b2D3+tXUNrgB9EzAClR1
mjJufmepZd0+5ox+n9KeK2m25/0g1gH0WcSfNbGR0RpwaunYh9PFtuFma97i59jJ3vlx1cXk
AHyWD1fGq6pmdOxunMZg5tF1lNuN6Uurqad3q7mxtb7dPiloVOx07J6hUb6hSXjEeK7sTf6j
mbmh7TRaY3iD9F2q1cbKx8qsvofuA0e06Oaf3XtOoKo9PNHTS7DyS9t91jrHZVsBt9j+XBw0
B7BpVvJwGXWevW44+U0Q29nMeDxw4eRQKkT8K3Gc6zp8bXSbcN+lb552fuO/BV8bJbj7jjNe
cZh/WMNw/TY5Pdje7PIfJWWZ76HinqLRS9xhl7f5l5+J+g7yKLlYVWQWvJNV9f8ANXs0e3+8
eR0SUgycVl7DlYgbcL2/pap9l7Pj2eOzlndOzRg5gxrXE4mY4imx+hbcOWWD81x7+evdGNuV
02+bGANsd7gzSm0n85k/zVn8k6OROodPxurYr7sc7nWCHt+juLeJ/csZ2P8ABJTrJLK6D1Kz
Jqfh5ZP27D9thcIL2cNsjx7O81qoKTY+Q6l3i08haBFV9f7zTwslFx8h1LvFp5CdCdKItbIx
nUu8WngpLTBrur/ea5JWfd08e7Fwavmrsl+Wy14a7HbmCs9XFlAuxq7X+yt8Pc17XlsHSY0l
Btw/TfZiusyMq3D/AEOSyt49F2BUPU22ObJ3Ej4yreVi25gt6iJycD1hkZNmFYXjJbSZqrGO
3h40DyT2VrpdTOo3t6pjjFwqsZtobRV7377R7jlH28c7VWZVun/aftnTy3JdZmZNFmTne7dS
ypzf0Ldk7QGujb8Ci0dcF9F1fVGtdigiurPxt+y98/RpYP0ktiZbIUeh9KbmdDd65bU3PtNr
vQYKd9Ad7KzEkNc0ePdN9YMTNNwFFeQKKKR+zRhkMFWSJbus4hu0/CJS0tTerbk2YofjWM6r
gXNkVXwLC3ysiHf2hKHj5LqbPRw3OJHPTco7LWj/AICx30h5SR5q90qnHo6dRVjFrq2MEljt
4Lzq87u/uJRsjGx8qv08ittrOwcJjzB5HyQtSOjKxc5j6YlwEXY1rYe3ycw/l4Qfs+Vg64c5
GMOcR59zR/wLz/1LkDK6Rf7XY1pt9P8Am23OItZ/xWQPcPg6QhVdctw7BR1Vjmdm3FsH+0G+
13xZ9yXkp06cjEzqntbFjfo3UvEOb/Jex3Czr8DO6bacvpc31/4XDcdS0fuuPMdp1V63Fxs0
MyqbNlsfosqkiY8D2c3yKg3OtxnCrqQFcmGZTP5p5/lfuO+OiCmm9tPV62dU6RYKeo4xgteI
kj6VGQ3kT4rRwc1mbR6gaarGksupd9KuwfSaf4HuhZfTG2ZAzsR/2XOAg2tEtsb+5c384efI
QHX2faPWZWauoVti/FnS+od6nfnFv5v3FFTqpKFN1V9TbqXbq3iWlTQUloyHUu01aeQkhJJW
apTxF2T0wHLpx3+jmUXsx+l4tZc01Bha59m1uhcZJfM6LpMq9mfgPf0ttGZVkzXkWmz0mBu2
HF7mjdPZZPSunbsnprTiOpysF912flPr2lznbw1rbD9PcXTp2Wh1XomTl5bciu2u3GbG7p1w
c2lzp1eTUQS4/wAoFONKZ9PdZ1Dp+NnYFrsIFnptxyBZTFZLONNNNCCj/bszG/p2KSwc3402
M/tM+mPuKr5XXGdLu9DLx/ToAHp2UmWhvYFpDY+RVrC610rOMYuVW+zk1k7Xj4sdBQ+ikVeL
03MJyenXejcfpWYxA1/4Ss+0/MKf2nqOL/SqRlVD/D4w9w830kz/AJpKNk9Nw8h/qW17bhxd
WTXYP7bYKD6XVsb+Ztbm1j/B3+yz5Wt0PzCSmzjZeLltLsaxtgH0gPpD+s06j5qdtVV1ZruY
2yt3LXCR+KzLrumZFrft1T8DL4Za/wDRun+Tez2u+ZRx+1cUAtLeo0djpXdHx+g/8EKU1T0G
3CsN/RMk4jjq/EtmzHf/AGfpN+IVmrqQI+z9Uo+x2v8AbDyH0Wf1LODPg6Cj43UcTJf6THFl
4+lRaNlg/su5+SPZWyxhrsaHsdo5jhIPxBS81NL7Lk4XuwP0lHJw3nj/AIl5+j/VOimH4XVK
iwyLKjJYfZdU/wAfFp8+FD7DkYuvTrYr/wC4lxLq/wCw76TPyIdluJl2sryWvwOoN/mnEhr/
APrdn0Xt8vwRU1nX5HRcnfl+/AvdFmQ0QGvOgse0fRJ/O7HlbYIIkGQdQRwqJy7MYGnqrWmp
3t+1NH6JwOkWt/MJ+5JkdMDWjXppjY7n0Z4HnX4Ht8ElN9JJJBTzLet59nWAa7LHYL8h1dXs
aMd9FbCbNj/pm0OBgd1PB+suQ6izIyxUYDS3DY2yvJDrXbaWbbQGu3d3BXn/AFcwSTtsvY0b
3UVtsOyl9k7rKm9jrogZHQc2yyvNsym5edjOqNG9vpM9Op24sO0u1cTO5HRTo4Gc7LF9V1Jx
8jGeK76S4PAJG5pDm6EEKGV0To+X/ScKmwzO7YAZ8ZbBVTDvHTrcp/URY3Iy7fWssrre+kCA
1jGvaD9EDUmFoUdS6fkfzGTU8+AcJ+4oeSmvV0YYrduBl5GOBqGOf6zP823dHyKlv61T9Kuj
NaO9ZNL/APNfub+KvweeySVqc9/VsPaa8+mzFadHDIrms/227mfeo1YGK4er0nJOPOsUuFlR
+NTpH3QtLy7Knd0np1zt5oayzn1KprfPjuZCSmvkjIczZ1PCbmVN4vxtXN8/TdD2/wBkqOLb
aZ/ZmW3MY36WJkki1vkHkbx/aCP9hz6f6LnOcBxXktFo/wA8bX/igZVeRbH7Q6a3ILeL8R8v
HwDtjx96KmzX1Sg2CnKa7DvOgru0Dj/IsHtd96tX0U5FZqvY22t3LXCR8VifamR9nblttY7Q
4XVGFjj5NtcBPzlJtpw4Nb7Omg8VX/p8N39S1s7Pv+SVKb5xM3EBGG8ZOPEHEyDOngy0z9zp
VaiwV2Oqwf0b9fU6Vk+2QefRcZA+UtVhnVhW0HOqOO130chh9THd/wBcb9H+0rV2PiZtIFrW
31HVjhrHm1w4+SSnPxc6rGJYNzcVp99Ngi3GJ7OHevwI4+CSWV03KaAWk5lbPobnBmTWP5Fv
Dx/JeklopBk0ZmA7puDjZThVZcGPnWx8e55Lzw3yTU9azHdWZj2FgZbfZR9l2kWMawS2wu77
ls2Y1Nl9V72zbRu9I+G4Q5Zx+r4blNy6c3IZZXu9Fri2xjN/0oD2nlRcBvQ0LH2OhHmsMoH3
YCeTgmL4QCckjLW/8X+W+tJQb8PDyf6RRXb5vaCfvhVtnXKvo2Y2UPB7XUu+9u8fgl+0Myv+
k9PuA7uoc24fcC0qRz1fsXDYZxnXYp/4G1zR/mkkJfZOq1fzOeLR+7kVNd/0q9hTt630sna+
70HH829rqjP/AFwBXK7K7Ruqc2weLSHfkS1U0vtHWKv53DqvH71FsH/NtAS/bFDNMmjIxvOy
olv+dXvCvpSUlNajqPT8j+YyarD4B4n7irMFBvwsPJ/pFFdvm9gJ++FW/YuGzXGfdin/AIG1
wH+a4uCWim7ZXXa0stY2xh5a8Bw+4qk7ouCJOPvxHHn0HlrT8Wat/BL7L1Wv+ZzhaP3cioH/
AKVZYl9o6xV/O4dd4/eotg/5toCSmk/oXUMdxs6flNa48gt9Ld/WDJrP+YqJd1bp7zZbg20d
3ZHT4srPm/Gkg/2dVt/tihmmTTkYp8bKnEf51e8I9HUcDI/mMmqw+AeJ+5Gypy8H6zUXHZaW
2lv0n0gh7f8AjMd8WN+UpLWycHEyoOTQy0j6LnNG4f1Xcj5JJadlNkWVn6bPm3RTFNT/AObs
E/uu0WZhdVwc7FGXS/bQXuqa+0enuc07TtD47q4rcsMJdK8mETkEz8a5nLTHiNUKCFOvItr+
i4x4I7cyt+l1YPmFFLlz0NrxkHVqOa142vAcDyHCR+Kp2dG6W87hjtrdzuqmoz4/oy1bIpw7
foP2nwP+1Rf0+wfQIcFEYSHRcCC437NyK/6Nn5FY7Ns23N/8EE/il/lyr/uNlD+3S7/v4Wm/
HuZ9JpQ4ITdeqWh+0r6/6TgX1ju6vbc372GfwUq+s9Le4N+0NreeGWg1O+6wNV1RsrrtaW2s
bY08hwDh+KSl2lrxuYQ4eLTI/BOqLuidMJ3Mp9B3Z1DnVfgwgfgm/Z+ZX/RuoXAfu3htw+8g
O/FJTfkoF+FhZP8ASKK7fAuaCfkeVX39cq+lXj5Q8WOdS4/2Xbm/il+1X1/0rCyKPFzWi1n+
dUT+RJSv2LiM1xn3Yp/4G1wH+a4uCSnV1fplztrMmsPP5jzsd/mv2lJLVTzfV68bEupxWUMy
zg4xx6MPImbLLhpfSIO8zo7wR8HqPVKOm4WVdez0PVrxGUuaD6rW+2251h1EbSR5BXsD9vvy
rsjKLqg1zizDcKnMdXwxtVu4ODu7idFitHS8jpuT6/q4RdTeML1HPtx2g62miGDvofLjRXvJ
g83ocfr+He+kenfVVlO2YuRbXtrtPYNPbd2nlaSy6Mq60YzOoYLMagCvZa+1j2m4QKhS1uuv
ImFqpwQVIjMi6v6LjHghJJGuqhfRu19RcNHtB8xojC/Eu+kAD/KCzElGY4z1A+q4GfYumcPH
fq3T4FCd04/mu+9VqvXn9FunyV2t+cPpV7h8QD+VRShDpKP2rxI9QWs7Cvb2n4ITq7G/SaQt
ZjnH6TC0/EH8icx3UZjHuus9nGSWnZ9k/P2/L/Yq7m4B4eR8j/chw+ITbQtoovbtvrZa09nt
Dh+KStOrx/zbfvB/uSQo/wAip//ZDQplbmRzdHJlYW0NZW5kb2JqDTIzIDAgb2JqDTw8L0Jp
dHNQZXJDb21wb25lbnQgOC9Db2xvclNwYWNlIDYwMiAwIFIvRmlsdGVyL0RDVERlY29kZS9I
ZWlnaHQgMTI2L0xlbmd0aCA0NTAwL1N1YnR5cGUvSW1hZ2UvVHlwZS9YT2JqZWN0L1dpZHRo
IDEyMD4+c3RyZWFtDQr/2P/uAA5BZG9iZQBkgAAAAAH/2wCEAAwICAgJCAwJCQwRCwoLERUP
DAwPFRgTExUTExgXEhQUFBQSFxcbHB4cGxckJCcnJCQ1MzMzNTs7Ozs7Ozs7OzsBDQsLDQ4N
EA4OEBQODw4UFBARERAUHRQUFRQUHSUaFxcXFxolICMeHh4jICgoJSUoKDIyMDIyOzs7Ozs7
Ozs7O//AABEIAH4AeAMBIgACEQEDEQH/xAE/AAABBQEBAQEBAQAAAAAAAAADAAECBAUGBwgJ
CgsBAAEFAQEBAQEBAAAAAAAAAAEAAgMEBQYHCAkKCxAAAQQBAwIEAgUHBggFAwwzAQACEQME
IRIxBUFRYRMicYEyBhSRobFCIyQVUsFiMzRygtFDByWSU/Dh8WNzNRaisoMmRJNUZEXCo3Q2
F9JV4mXys4TD03Xj80YnlKSFtJXE1OT0pbXF1eX1VmZ2hpamtsbW5vY3R1dnd4eXp7fH1+f3
EQACAgECBAQDBAUGBwcGBTUBAAIRAyExEgRBUWFxIhMFMoGRFKGxQiPBUtHwMyRi4XKCkkNT
FWNzNPElBhaisoMHJjXC0kSTVKMXZEVVNnRl4vKzhMPTdePzRpSkhbSVxNTk9KW1xdXl9VZm
doaWprbG1ub2JzdHV2d3h5ent8f/2gAMAwEAAhEDEQA/ANw43VsTJq6nktry3UVjFczGDt7q
XEGy5zXfScIHtHms6p+E+zIx8+vKzc3Lu9SjGcSy+zHr0q9YS1rGAkwCrmRndQebM+rIdW1u
czDw8VoG2wBwZYX6SSdfhCs33U9S6hmYOV0z1WYVbbG2OLTY8uJ2CuPoyBOpU7E07bOq9H6a
wW5OOx8OLcEg3XWl7jsoDpDiGtO3dCs/azidQp6bhXudfYze7EvBsrrO3d6frD3MdHA1VTEZ
hDLzMnpuY7CzRH2qrqFe41ueNrP0j/c0eADoRquiW9P6h023Hvtysf1bbctz9rve+szbuaN3
uOkJKdRvVKmOFedW7CsOg9TWtx/k2j2/fCu8gEag6gjhAoy8LOY5lVjLhw+s6n4OY7X8EA9M
NBLunXOxTyaT76T/ANbP0f7JCchvJKj+0bsbTqNBqb/3Iqmyn5/nM+YVyu2u6sWVPbZW7h7S
CD8wkhkkkkkpcOcODCsV51zNCdw81WSSIB3CQSNnSrz6naO9p/BWWua4S0gjyWIpNsewy0kH
yUZxjpouEz1dpJZ9XUHt0sG4ePdJN9uVruMPE51LOn9aGZVe2+8W+q7AY2WV1Fv6fIfr7HwC
Z+Sieq5+Dj5WQ6tleR1ZpzMWyS57GSypjHsjVzWuBaByVWY/HoyMxmHbb+xLsTJuv3OFjrn6
M3sc4bgNzvbJ1+Cjmuz8eym/q3o2ZeJXhvxqazsrdWbINbi/88uAJPGifa1Lm5HRqKGYN9lu
A/Cm+wZdQtF+Q5vt9Ue7e7XdH9y6PoL6LOj4t1FbKWWsD3V1GWNefpgfNYD2WW2v6j1KnIoN
9j78W7CeL2te1gqpZ+jDpMTB4lW8G5leLS/Myb+l9Qc0HJD2kUGw8na4GvXvBRG6Ds7eT0/D
yiHX1Bzx9Gwe14+D2wUH7N1LH/ouSMisf4HK1PyuZr94KhVl9SDdzW0dRq/0mM8MfH/FuJH/
AEkWvq+C54qtc7GtOnp5DTWZ8i72n5FO0QxHVmUnbn02YR/ff76j/wBdZI++E56diWn7ThWH
Gsfr62ORtd/WZqx33K7y3xa75gqk/pOLvNuMXYdp5fjnYD/WZ9A/ckpb7T1HF/pdP2mof4fG
HuA/lUnX/NJVnGy8bKYX49jbAPpAcj+s06j5qtv6vjfTYzPrH51f6K3/ADT7HfIhCdZ0jOuA
s3YuaPol00Xj4O03fiElOmkqP+VcTkDqFI+Fd4H/AFD/AMEbG6hiZLjXW/bcPpUWAssH9l38
ElNhJJJJCkkkklPPHpP1czupZuPh7WZbMYU2ikAMq3OOumm6RqFKrFvybrsirJxs/Nx7K6cm
p1cU7KmkioE79r5du3Dug35NLr+p5WDmY2Iy9lOPRlPcAzcNz7QNuod7uY81D6v9RwOm4uZk
ZluNj4t+Wa8d9L3Pa8sY1hjST8U3Rc6XT2u6NimvJre52RbZe4Ytbn1VbzPptjWB8FZHW+lO
9r8ltZP5twdWfusATs610lxgZlTXeDnbT9zoRxkYl40tqtB/lNcneSGsen9GyzvZXSXnUPpc
GOnxmshNZ0q8MNdeZYaz/gslrchh+O8bvxRX9H6Zd7nYlRnlzG7T/nMhD/Y2Oz+YuyMfwFdz
o/zXbkKU0T0zqWMS7GY1vniWmoH403h9f4pv211LE0zMZz2j85zDU772+pWfvCv/AGLqbP5n
qLneAvqY8fezYUt3Xa/zcXIHeHPqJ+RDh+KVeakWL9ZOkZBDTcKHnQNthsnydq0/etC2nHyq
ttzGX1HjcA4fJZeTXXkAjP6IbJ0LqzXaSPi0tcs4YPR8Z+7Dyc/o7/3dthq07Fr2vZCVqp2v
2bbRr0/JfQBxTZ+lq+5x3N+RQcl7nsDOrYHqMbxkY82BvnAixnyQMXqHUAYbm4XVKwOzhj3T
8Jcz8iut6xjsj7UyzDP71rf0fytZLPxS0Uixn37d/TMtmfS3nHvd+kb5Cwe4f2wj1dUx3WCn
IDsS88VX+2f6j/ou+RUrcHp+dF+1r3fm5FR2vHwezVBtw+oNrNbbK8/HPNGW0bvlY0flCWqn
RSWELjhENY+zpp7Y+WDbjHyZc0nb9/ySStVNSrKa7A6j1Kl1d3Usk11uqYw+nQT+jqb72idg
MuclkY/TunWOqLRZiu6c+jFe1u8PuLneqBtB97yQVnY4d9lvbTD3W40vbVO4NZb7heO7yF0X
QDU63PfigDCdaw0bRDZ2Dft+ar48/GYiqvx83T5v4aMGPJP3DLgP7tDeI76H1aeRZY+dh4uF
j4nUCftNdNbbmmt7/dtHcNIKG/I+qthmxuPP7xq2n/O2har8miup9r7WNqq/nHlw2tj949lX
PV+kitlrsygV2TscXtAMcxPgrDmOcR9Uplt9VJ8W3Pr+73AKTT0WJp6vZWO23Kkfc6VcPWuj
f9yanf1fd+QFQd1borjJIefEUvdP3MKWngr7UQIBinrk+DX+i/8AgCiNs6j/AIPqOHaB2cza
fvbb/BQOb0JwgYxsB/7qv/79WFAv6M//ALyn2R/3UGn3hJTYGT1dv5uFaPFtzmn8WkfipDP6
kNH9PLh4131u/wCiYKpuZ0oa/sS1vxorYPxeFUuyeg1aP6cGHsHWVsP/AJ8lK/FTpXZGNd/S
+k3u8S6hlg+9pKrFv1dk/o7sV3eGX1fw2qgczpTv5jo19p/4O14/EOj8VNjcq3SroOVWO3q5
RY35e9yFppn+zehGzfg9Ysw7vFlrZ+YeFo446vU32dQxuoD831Wit0f16nEf9FY19OU14pvw
mttd9CkZll1p/sMYY+eiVP1OyMsF+W4dODuGYzi+3+093t/BLyCvq7z8/NprJzMB3pfnPpey
xpH9V20pIWD9WulYbQNtmU7ndk2Ot1/quO0fckjqjRr9bry6bTbi5L6sjILK8DEoAG+2Ze67
T3tjnwCy7vtbepX3h5bU3Lfh2ZTLCLJurDG1DHOmyt7pkaq3lUW9X6g0WY5w+oVY4fVvufs+
zWOO7cKdpD9w1EoWNhZmV06vq1bWHJa200vxqx69gb7Mf+eLh2kkmUPJdfctCvEtudVTU2mu
ujFJv+yzcH2Y1jXV23VgNPucCNp93K2OjXZDLuoZr6X5bMy2tzPs9Raze1kWbW27SG8ankrP
GQMunO6h6vp9QxcenIx3smsb2y24GvSZsaWuldH+3OnFrf0vqWOaCa6musIJEkewGISCCr7X
1J38100tH71ttbfwbuKQPXn8fZcf/ty3/wBJpftLJs/o/T73+DrdtI/6bpSnrlnDcbGHmX3O
+4bB+Kd9qF/svVn/AM71Is8qamN/6veUzulNInIzMqwd91xY37m7Uv2fm2fz/ULj/JoayofI
gF34oORgdBxW+pnvafF+VaXT8nuj8EP5aqR2U/VbHdttNL392ve65x/slz/yItOZgsEYHT7b
B2NdArb99mz8ipWfWnoGHX+o0uyAPojGq2sMcw9waNFYwszrvVWesam9Lw3j2F/6TJcP3gPo
M+cpWP8AeUzyeq9RpAacaqhz/wCbqssNlrv6tdDTP3psej6wZbi/PyG4mOeKMdkWkfyrCXbf
7Kv4uDjYsuqaTa/+cued1jv6zzqjo0pFjYmNiMLcesV7tXO5c4+LnHU/NFSSSQpJJJJTzWPf
ldPyLx1l9FVucHOyLKzZbY1hmuqXBobXW2Y1THIoOFjYFbbq6sa4YOJ1JtgrByWDZq1kuDXc
KXUMwDq+aynEvzKLcX7HmekwENtAc+se4jdLX6xwsG7p2fb0/Ciqp7s9ld9NtVr69ttIDrGl
riWeo5jfp6d0wlc7eF0V+TffgZdtbaemGsVvx69r22Pm20epbvc6ZBJPdX/q5YzH6IMvIvcG
XvsuNlz5LWOcQwbj5BV/q+a8HqWb0uz0m3ZAbmVtrtNvtcNhaS/3F2klX66M6qsYWFTVi4lP
srstJtcRzLa2/wDfinBRZ/tiiyfstN2XHLq2FrPnZZtCpWdazrXmrGrqFnGyvdkvH9b09tY/
z0TIqwGWCvPvt6lk/m4o1+6iqGgf1lB+TnWO+x4zBjRp9lxtpe0f8LdHp1fASUkNTN/aG2ep
9QOIwifRaQbSP+LpgD4klZhwsYM+2NoGLjcDPzR6+RYezcfH+jJ7TK13Y2Hguc61rcvMbDnM
1NNZPBscZc93hOp7AK7gdMsfkDqPUSbcofzLHcVDybwD+RCk2g6T0VsDJy63NLocyq12+0xw
693E+DG+0LbSSTgEKSSSSQpJJJJSkk/KSSniMsdNyMRx6VQep5FzasOvLbbtdXlMAYx+x8Fs
gTu7qNwzNmKMI3uo32/ZMMNreW57ZbbU/XWojcVp493T8Prz8PEbFuLjMw66mMLnPe73+pbs
/NZpLj5rJdivy7sqzHx/st2DfVVfh4Di17mguY7IqsIbG4ugmOJlMK9s1u+r+Ff05mJUanm6
3Lua2tzr/Urmo47QAXRvdEcABdgw+rWHFrm7xJY7RwkcHzWV0Z4w3XdPvxWYlmFWLvUY83B1
dhJLjY4B27cDuVLqPW8jLxsptOLfXj47K8klp2XX424izY0e5kxp3hEaBB1dQ9ONe+qtzcLB
Amz0tLbP3vUtdq0fj5oJvYMbbhj7H09pj12t/SWk/m0NOpLv3iq/SMj7Saem5bKb6HUNy8d9
VjrQG7o2XF5MuE/NatWK91/2nKIdY2RSxv0K2/yf5R7lFCHB6eGbbraxXtk00ciueXvP51h7
lX0kkUKSSSSUpJJJJSlKut9jtrBJKLj4r7jPDfFaNVLKmwwfE9ymymB4ldGJKLHw2Ve53uf+
ASVlJRcRu7ZOEVT5td9msxaeu5Dm4+Zm5dQqtLtoobUdtrQ/Tc0hhPmi/syrYfrA7KfZRQ66
6uj0zUH0WFznVuBhziSfaTp5KFNLKMDp9dmTVlPu9NuLdkM2YdAAMPrZZt32H47p5hdJTXfX
jbOoWsvsH07Q0MYRPtlskKUMbyOVjUOqxszpG3Hxs3Zj1OstsrdjZIJcXWiTugDbtcVsY2U+
+2vrd7qqBieth5rgSa7GAgsfUY19/ARxX0n7dn2m5now1vUaLGj0PW5a8ueNu+NCAfihX3O9
cVZWPX+wXPo+xZFLm+20OBZLWGS0vgCPyJBTB1tzLa+o/V+iq3p4a851NbAyy14dENEA+owS
YPK2cTLx8zHZk4zxZTYJa4fiCOxHcLB6e6uz6y2twWZNPo2XftB9pc6q1xiA0fRaQeONPFdD
V6O0+jt27jOyI3T7uO88ohBZJJJIoUkkpNAJgnaPH/ckpYAuMASSr2PgxDrf83+9TxBijStw
c/uToflKtKOUpbAFfEDqQsAAIGgCdJJRMikkkklP/9kNCmVuZHN0cmVhbQ1lbmRvYmoNMjQg
MCBvYmoNPDwvQml0c1BlckNvbXBvbmVudCA4L0NvbG9yU3BhY2UgNjAyIDAgUi9GaWx0ZXIv
RENURGVjb2RlL0hlaWdodCAxMjYvTGVuZ3RoIDM4NDUvU3VidHlwZS9JbWFnZS9UeXBlL1hP
YmplY3QvV2lkdGggMTIwPj5zdHJlYW0NCv/Y/+4ADkFkb2JlAGSAAAAAAf/bAIQADAgICAkI
DAkJDBELCgsRFQ8MDA8VGBMTFRMTGBcSFBQUFBIXFxscHhwbFyQkJyckJDUzMzM1Ozs7Ozs7
Ozs7OwENCwsNDg0QDg4QFA4PDhQUEBEREBQdFBQVFBQdJRoXFxcXGiUgIx4eHiMgKCglJSgo
MjIwMjI7Ozs7Ozs7Ozs7/8AAEQgAfgB4AwEiAAIRAQMRAf/EAT8AAAEFAQEBAQEBAAAAAAAA
AAMAAQIEBQYHCAkKCwEAAQUBAQEBAQEAAAAAAAAAAQACAwQFBgcICQoLEAABBAEDAgQCBQcG
CAUDDDMBAAIRAwQhEjEFQVFhEyJxgTIGFJGhsUIjJBVSwWIzNHKC0UMHJZJT8OHxY3M1FqKy
gyZEk1RkRcKjdDYX0lXiZfKzhMPTdePzRieUpIW0lcTU5PSltcXV5fVWZnaGlqa2xtbm9jdH
V2d3h5ent8fX5/cRAAICAQIEBAMEBQYHBwYFNQEAAhEDITESBEFRYXEiEwUygZEUobFCI8FS
0fAzJGLhcoKSQ1MVY3M08SUGFqKygwcmNcLSRJNUoxdkRVU2dGXi8rOEw9N14/NGlKSFtJXE
1OT0pbXF1eX1VmZ2hpamtsbW5vYnN0dXZ3eHl6e3x//aAAwDAQACEQMRAD8A1syrrLeo4ePZ
fXfksL8jp+SWemHOY3bdj3MbMBzHaOC0cPH6lkdRb1DOqbiiql1NeNXZ6u4vIc573AAaRonq
wasBzuo9QzLMl9DC0X5G1ra2H6W0MAEu7nkqjbk4/Wc+qk3WDBtxftGHXW80nIs3EOl2h9kD
T5qwwul1LCyM2zHoFjq8Pc45Yrea3uEfowHN1jdysrppwurdOrwL7HWZzQbjksH6St1biyq1
1g0D4HflXei52fdkZWHmMq3YoYQ+lxe1u8fzL3H6T2gSSr2FgYeBU6nDqbTW5xscGjlzjJJS
31UlrZsaNx3PgB9kAFxA5MKSSSKFJJ2tc4w0ST2V7HwAPdbqf3UDIDdIBLWoxbLjI0b3JWjT
j10iGjXue6IAAIGgCdQymT5MgiApJJJNXKSSSSUpJJJJTxHVMhjxidVLW5/RWRZYxok1n83I
AH02t/OaeOU+F0yi6q/p+bQMjDrtORgXng13fpIY5pBDmkn5Knh9A6jba9x6gwdJywbS3C3V
Fz3iHFrTuaG2A+4ArpKqq6amU1DbXW0MY0dgBACsBhLDGxcbEpFGLW2mpuoY0Rqe58SipIld
NlphglFCNWKMSy3U+1viVaowWV+5/ud+CtKOWTt9q8Q7o6qK6hDRr3PdESSURNsikkkklKSS
SSUpJNIS3BAyiNyFLpKO4JJvuw/eCaLiNa1jQ1jQ1o0DWiAB5BTYx7zDQSVdq6eBrafkFaY2
usQwADyViWWMerEIE7tSnp/51p/shXGsawbWiB4BLcE24qvPmI9TfkyCNbM0kOSkozzA6BNM
5CbcFFJMPMS6ABNMt6bcUySacsz1VS+4ppSSTDInclSkkkkFKSSSSUqUkkkrUpJJJJSkkkkl
KSSSSUpJJJJSkkkklKSSSSUpJJJJSkly/wBXnOfTZn2ZdzsgC7e17wa7w0mLa6zq0N4UR1jJ
/wCaVWRj5QfltLG5Nkh9jRY7hoOhfB0CHFpfhbel8PnxmEZCVZIYiSCAJTv8NHqklynT+p5j
87Jxj1C1lNddTm25lLWPFj3xt2w2dwEIl31h6gzNseH1CqrMGH9gI/TOaYHqh0z3niEuIKPw
3NxGIMSQBL9Ib1W4629OksKrrWbV1CqnLOPZj5Tbn1nHcXOrFOvvPBkfil0f6yPz84YltbG+
rUb6X1lxG0GIdvaPvGiVhjlyOcRlOhKMY8ZIPTUfhRd1JJJFqqSSSSUpJJJJSkkkklKSSSSU
5OIz6um2cMUmzqAtbur5eGGLQCOIJ1QLh9XG9CyK9m3p+G812NrBa4W1uA9vcu3EQVkt6bk9
E650wUUWW9PLbLLHVtLvTt9HZbIH+kIafirGBZbdX1bEv6bc3Ezbrb6rMxnp07XVtP6X3bmj
c1P4I/Rk9/Nd+5KwRL5jvHY/RL0z0acq8fYc051tbHNrzXNeLGMdptslzQW7pgmVYyeqYlWZ
dd9irORjZlGG+8xv2XhkPDonTfELPwaM7p7bcvKdf03pTcctua7J+1fpHFoZZjn3lrWjx+5G
6xidOyMplZwbsrNy3GttL7TRXb9naHfaHOafzQfa6JR4Y3sqWbLImUpyJI4Sb6bUjxcw1dYt
bj4eKw3XZWJLWkONlLBawudMQ8H3CFD6n20V51lFxbXmXUCxtTmNENDjvFD2WPa6sO7crJfl
Y9mXUem4IouwCc2tj99j33y7Hvbe4u2tDS3WwnwVqu6mvquJmF7KMtnUnUO6fSxgAptaWNs9
jdxBBDt3CJgK2AQc2UggzkRKhL1HUDa/J6HP6v1yrMfR0/pDsytkD1X2+gCe8b2EEfNErzPr
I5gfZ07GqPdrsomPm2khWcrBy8i4kZ1tFBAiqlrGkHud7g4oQ+r/AE12uQLMo9zkWPsB/sk7
fwTbj2CxpX/WDNxyW2swWuHLBluc7/NbQShD6xdcs/onSRlTw5lj2MP9u2loWm7I6F0z27sf
GcOGN2h3ya33KP7bFv8AQsTJyvBwZ6bD/buLAjp+6pFRm/Wa1m6zpdFDv3H5W4/eykhG9X6x
H/tPisnubXuj/wADCW/6wXfRqx8Nvi9zrnfczY38Sh3YD2sNnU+q2ischpZjsjwO3X/pIadg
pV2R1ulu++3Ax2jk2F8feS1Uf231J7iynJx8lw7YuNfb/wBL1Nv4qdb+gVk2YWE7PsbzftLw
P61+Qdv4qP7Y6tl/ounV1tA0/QD1g342u2Uj5bka8FK9X653a1Nox2Hl97Q2B4hrHWH7yElX
yukBwFn1h6i8tf8ARxK3kl38mABu+TEkdPD7FJcjq+RZ0XEz673m3DzKq88bDS6N/p2MsrJO
3R4KzPrJV1Hp78jp1eW9vTequjFZtDz61rgLcc2OktaQS5vzC0BhfVW/1OnZeY6645LmZNNt
xrddkP2n3sYW7hxt7K1hg2/V+OiYtePkes5gqs94qsbZ6dlh3fSc0CUrrp16qc3r7c2+zN6X
kHMqw/QbXgU4VW9t0s1Nlga6Idpt00WkMH7TgYN/VL7MPLDahjhhayym017bGNdDt2/uCq3V
crqPRd1V2W/Mx8zGvDXWNa19d1Ve4OBYG+13h2Uul/bOkCjpO316r6m29NsuJIbYGh1tD3wS
O7mH5JdBSlWY/wBWG4+I2vEdnb6brsUiXOu2n1LGuJI3Oc4zDk2d1vqVIdi14dON1cuobjhx
9St9driI3BrSCNpBQn9IupzMJmLn13U4+XZZj4ghr/TsDvtFZeHa7A+QNFUzLMYUvyeh025l
+MKc23IyLSXsqqse30mCwEnRr9NEgB5qenxsx3VunC7DtOJaTttBaHPrewxZW5rtJBUf2Fj2
a5l+RlnwssIb/mV7Gx8UW2zMsqqs6WyksvHqG20kABwBB2sHun4hAf0y+xpf1LqFjmDVzKiM
esDzLfd/0k361+amZd0HpAAijFdyGtA3n4Nb7io/tbKv/oGDbaDxbd+gr/6cvPyaq+PkdKoc
WdGwvtds+6ypoDJ/lXv0+4lWPsfVcvXMyRjVH/AYv0vg65wn/NAS06/iprZd+XXA6j1FmJu+
jjYbd1rvgX73fc1Cp6dZc8WY2CKz/wBzOok22/FlRJj5kfBWa7+kYFjqOnUHJy/z20je+f8A
hbnHT+05F+y9Uzdcy4YlJ/7T4x95H8u4j/qQEbrwU1cijpdFjW9Rus6ll8sxo36/ycev2j+1
96str6tltDRt6XjcBjIfeR/1DPlKsMp6b0qhzwK8arl9jjBJ/lOdq4oH27PzRHT6vRpP/avI
BAI8a6tHH4ugIXf8SpIzF6X0pjsmwtY8/TybnbrHH+u7X5BJZb7cSlzsil32/JrMP6hkmaa3
fu1huhP8msfNJGjvZUixuhWO+sTc5uIzHwMhlebc0hu8ZbAWBhjX87cfMJ/TxOnZWdY7Itzq
+qW2MxunYsktdtH2j6JHukSXE+1Va7vrKOuvyGYz3XOsew4VlhFDccsZttFu3ZpYNQ3XVUHO
Fdud9qYb8o5Zswh051tbxcWtGZTWWtc47QAXEjaZ5TqPU9FO3iUdBrw7M7qL8gsrBxXN6mSX
VgxNbWxru01Ek+KqtybOu9GzKftFtecLLcTGaA6ppe0+vQ8tiWbmQJPZV6a7bseu2+7LxXfb
GHotOW023+q2t28O9cMbteJiXaeK0+jDIp6vdtdblZN+39rm0MrNBDJx9ra/0bgRIO1zjwgf
x6Kc3p3SM1rD1B1TOl5NL6r2vyA2ur1GtNVlQqrcfYWu1eTuJUG9Otrvuw7a3X5WZk3VUvY9
2NU+t7fXyKn/AEnGtrp2xqZUfrLV0FgeRdkWdSY9zrRki6X45BF7GmxrWBoYZbGkgd1pkbuk
dPPXnPZY3ZXjtpB+0OvaSGX1OrJcN1epbHxRs7qamJ13NqzKMdlRx8XFe2p2E0bi2tp+zXN3
cu9J+x4P7pXS3dJwrb3ZOYXXgHc1lzpqZH7rNG/MrEx3dFsqYxrDR6NmSMKzc9zrv0f6w64N
HqN/lh8GfkrllGDWKndZyX3tcB6bXMezFbppMDb/AJ7k076aKbf7Xqf+h6XScxzfbNcMob8b
T7f82U37Ny8vXqeQSw/9pcea6/g5303/AHgLQq9L02+jt9OPZsjbHlGirZV3UjZ6OHQ0Tzk3
OGwfBjCXOPxhNHgpKBhdPxtPTxcev4MaFT+35ubp02nZUf8AtZkAtZHjXXo53zgITKem1ZrG
9RvdkZx1rfktLa58KWkCv7pKtZLup32Opx2jFpH08p0PefKqtpP3u+5LT/fU1bKcDCuZZluf
1DqLtamEb3/9bqHtYPP8UHLfk5FgpzAbLHia+l0O0j97Jt/d/D4qWNsc+zG6V7LP+1mbd7r5
8PTf7y7w3AN8Ff6WOntqeMN25wdF7nz6pf427wHT8UbrxUww+lhj2X5ZbbewRUxoiqkeFTP+
/cpKWZ9uteaapxsZom3IbDrHD92prZIPmR8Akl6t/wAFP//ZDQplbmRzdHJlYW0NZW5kb2Jq
DTI1IDAgb2JqDTw8L0JpdHNQZXJDb21wb25lbnQgOC9Db2xvclNwYWNlIDYwMiAwIFIvRmls
dGVyL0RDVERlY29kZS9IZWlnaHQgMTI2L0xlbmd0aCA2OTg2L1N1YnR5cGUvSW1hZ2UvVHlw
ZS9YT2JqZWN0L1dpZHRoIDEyMD4+c3RyZWFtDQr/2P/uAA5BZG9iZQBkgAAAAAH/2wCEAAwI
CAgJCAwJCQwRCwoLERUPDAwPFRgTExUTExgXEhQUFBQSFxcbHB4cGxckJCcnJCQ1MzMzNTs7
Ozs7Ozs7OzsBDQsLDQ4NEA4OEBQODw4UFBARERAUHRQUFRQUHSUaFxcXFxolICMeHh4jICgo
JSUoKDIyMDIyOzs7Ozs7Ozs7O//AABEIAH4AeAMBIgACEQEDEQH/xAE/AAABBQEBAQEBAQAA
AAAAAAADAAECBAUGBwgJCgsBAAEFAQEBAQEBAAAAAAAAAAEAAgMEBQYHCAkKCxAAAQQBAwIE
AgUHBggFAwwzAQACEQMEIRIxBUFRYRMicYEyBhSRobFCIyQVUsFiMzRygtFDByWSU/Dh8WNz
NRaisoMmRJNUZEXCo3Q2F9JV4mXys4TD03Xj80YnlKSFtJXE1OT0pbXF1eX1VmZ2hpamtsbW
5vY3R1dnd4eXp7fH1+f3EQACAgECBAQDBAUGBwcGBTUBAAIRAyExEgRBUWFxIhMFMoGRFKGx
QiPBUtHwMyRi4XKCkkNTFWNzNPElBhaisoMHJjXC0kSTVKMXZEVVNnRl4vKzhMPTdePzRpSk
hbSVxNTk9KW1xdXl9VZmdoaWprbG1ub2JzdHV2d3h5ent8f/2gAMAwEAAhEDEQA/AOzwfq1c
3Hc3qGT62T9tGazIrG0ywNYzcDOpa33IGb1+nHysjOZhD02PPTznFwn1hqxjq+dnqOAnzXSr
mevfV6jKzg6r7NSc323Otc/1N4/wlVQdsc/a2JIlUomz6lzm5j+pX4fT7jknNqyx9rZXawEf
acdptOPtZHseA4AdiFbN7eq9IDenMqx83HdVlY94Hp4xzHEuNI3wSeQ74psHJ6NkdQxrekyw
5XqOx7rS4113tIN7Ps5Ldj7K5dPdA6t03qHVOp5TMdxzOnuvxLXUF0Maz863HeNA5u0zHxT/
AMFOrf1HHf01uDnk5Vb7f2f1O53s9Ox7dHFsfRc4gA+YWLULrMXKwvQfk1H1cLqFGKJLMph3
0ZTWk6eoI3HxW0Pqqy/cep5Lshrw1mUwQ1mQyozQ68fvtHJB1V267D6NXj4WJS2t2UXV4w1F
ZtDS9rbH6kbuxQsDbVTV6H07rFWY/qXU3VV3XY9dF9NJL2vfVMXucQ2DBiFZs65TbRlO6ax2
XfjMNjWbXNZYGn3BlhbtcfgsXreVnV5mX6l99OWxlbuk0UhzqbTt99bgGw8l8h27gaq1R9VT
VlttZc7Dw2MMVVW2l4D2Q6uXvLGsBMja1AgblTpgv6vj0ZOLluqwb6w8ioAWO3ax6hnb5wJR
I6Z0fGgBtFbjwJL3uP3ue4qnh2V1YzOnfV+lv2ekbPtL59Fvjt72O+Gnmj/Z8LpoObmWm/Kd
7fXs1eSfzKmDifBoQ8PwUsW9Q6gCbS7p+H+4DF7x/KdxWPhr8EOh/qV/Y+isbRiMJD8yJbP5
3pA/Td/KOnxRRjZXUjvzgaMTluGD7ned7h/1I+au224+LQbLHNpprHJ0AA7BC+imGJhY+HWW
Ugy47rLHGXvd3c93cqs/Lvznuo6c7ZS07bc2JA8W0j853nwFH08nqmtwdj4B4p+jZaP+E7tb
/J5PdTtyHuf+z+mhrXVgNttA9lLfADgv8G/el+amMsw46d0xgflO99jnEkN3c23O5JPhyUkK
uht2/Bwi5uM1x+25Uy+x/wCcwP7n949uEkfzU0Oo/Wx+NnXYxp9FmHc1tz36+pQ5o3vrI4dW
XBxB7LmOrnqtOD0vqWRY7Ksa9oxs8CTuLtKrtvg8e13cEhdLX9VcnKHUcPq1gux7vSGJlsMX
zW0sD3aQHhvtJ/OWljs6Z9XOjUY2978PGc2n1HfpCC90brD29ztfBOBA2FqcTD+rmR1Po/Tc
xhf0nqeO5r3BzZltdhIa9kjWPonwK3LOv9CwLxgOubUayGODGH0q3O4a97W7GEz3Kq9Tu6pd
1h2Fi5X2R7MYZGEzaCy57XEWNsnUgaCB4yquPnYP7F+z1dOyb/2q222ytrPUYb7XOFtb7OGw
7ueyVXv9gU1retvuttPU8i6utr3syemNw3WVigEtPqWbZ1b7twMKnk9Oe9+Vg1nqFmI0V3dG
qrdux2jaHsyDkP4DX/mudoFsZPTG4fRsJvU8rKJZVTh3002kVWOcQxosMTEnaXDsgdYsyab3
V5VmRgsbisPTGYm59frtB31O2N95naAHaEIg9lI3/Wh2Pg2fY8cuuaxmT1HNrDjUBYRXbfQ1
2tm0ieAFf6LmVZ/TsijqtwyGYzhY+2wtDfSd76m3PrIYXhurhwoWYmTTb+2Op5IxMe3Hxq78
ZjRO9szW55kNYXvg/lWK7Js6kPslDa8HGquDWYIq2CrLa/8AQ0XbDFnqAEv0gCClQI0+1T2g
ymW4Qu6X6eU0+2rY9or8PpNnQeSji9O2W/ast/2nMIj1CIawH82pv5o/ErM+rJe/7d1O+qvA
F9gbbhNdpXbUNljnkho3O8u0LXzL8lgazEq9W22QHu0rYP3nn+A5UZFGgpWZnU4jW7pfbZpV
SzV7z4NH5Twg0YN19rcvqMPsbrTjt1rq8/5T/wCV9yJiYDMYuvteb8qwfpch/MfutH5rR4BA
dbb1NxqxnGvBBizIbo6zxZUf3fF33JeX2qZW5F2bY7GwXbK2HbkZY7Huyrxd4nt8UMMD56Z0
79FRVplZDeQTyxru73fnHt8VOx5cR0zpsVNrAF1zRpU391v8s/hyrmPj1Y1LaaW7WMGg/KT4
kpXSl2MoxaAxgFVNTeOAAElQP+Vri3/vOpdr4XvaeP6jT95SSr7VOdd9Y305+VZk5VGJh4Fw
otxXsc6+xrmgi1sGdS7SBEIdGX0tnUOr9IyXeq3NyG7MZgL3EXVN9R21s7W954Wt1botfUwG
7xjlwNd9rK2G11ThDq22OBLJ8Qq2fn9K6L067IxDR9pDfRZJG+yyobQxxHucWgJwI6BTWq6S
3E6W531ky/V+zW/quQ1zmPrrA9OsMLIdve36XiVWys91vTcqjouQ3p+D07Hc+xoa5uXO1xa0
MtaNjSfz9ZTZ1/V3XYTLDX1B1b29QwbKwKxkNY0i2mJID2tfuYe6Jm4rvrHleo2m/puO3Fux
r8q9gre71tu2trHc7CJk6I+J/s+xTnZ/1f6wzpFXpX5HVafQZYzDfZ+lpv8Aa8Wt49Vu7813
HZdDmZzsd1LMCpj+qdUdsO9x2MdUybHWQT/Nj80alZuRbkfVvOox8HD+325jCX5ORbF2Q+sf
zLHn2tcBqG8EcKn0ev8Aa2bmUPyPs3UBYzqWOa2Frsa5w9G6p9dmpGg3T9KUTrqdlOth5ORc
3N6bm44u6sYrymSRRZU5pbXkMY92lZ4cG6yh4dHQugGpvULG3dWooaPXLCbXsJ2NbXAl5b9H
96OUd+Hd097+v9Vsf1HKxKyxjMavY2upxHqFte4lxgSZPwUuqYNHUqKM/DufbkOsZd0zJa0W
MpeWwHaD+bcPppun0PZTgde6+c11raLqrafp1YNrW+lbWyBY24PbvNrn+1rG6jldH0Cnq2I+
7Cymg9Pra13T7S7daGO5ptnuzgeSHXQOj4mR1PqQbfk3WNvyTRXLKXbW1l7Gn3bWgS48rMd1
TLv6nifZgG9daWsvpYScbIwXGftAdr7By08h2iO4obKd4i3qjiHB1XTwYIMtfdHj3az8T8FP
JvsdYOn4EMtAHqWAe2lnbTjcfzQiZuRkBzcbEbORaJ9Rwllbe73eJ8AiYuNTh0bGnxfZY8+5
zj9J7ymfyAUyxsanFpFNIho1JOpJPLnHuSqeS9/ULnYNDi3HrMZlzdJ/4Fh8T+cewUvttXUq
Hs6Vl1PcHBltrHBxY08kAfneEowGJ03C/wBHj0Nkk6n4nxJP3pfmpjl5NeBjsZUzdY6K8bHb
pudGjR4Adz2CSr1H0m29Y6iPTcGH0qzr6VX7sfvu7/cklX+/4qcbrXVOoPLX5FWX0/Haxzdm
O6s2/aXODad+1zvY783tPKoYPTL8jNxuoVUG2+3Jrr6220DfTkUQ91jORseNCG+S1sb6rl3U
r35TTZhPqNFpyLDddkiQ9j3nQMFZ+jGq18UdNwn/ALJxNtFwrNzahMkE7S+XfSM86p/EAKCm
vjdCwOm2faq3WmrGD3Y+O526undq/wBJsTr8fgsvKyurZ3RXdWvrxsrplrPWf0xzTvOOPdPq
z/OBvu4jsm6T1nrl3W6cHqrmY9rRYx+E1omxgburyN8n6XEN4V4/VYBtmJTnX1dLucXPwG7d
sOMuYywje1jv3QhsdTqpxG/Vu7IdkU4+K59WQ5lnTeoW3ufXi0FrXNNLHOL22B2v8YW1ldX6
fWThY+dTX1YhmMcy2skb+CHOaA3d3Dd3KDmda3Y1wZg2u6JjuOPdmU2bLGis7HvrrZ7yxhEE
grPwmjG+r9n1fPTrcmy1rxRdU02Y+R6nuZkesTDeQXTqCjqd1MfWv6FnO6litut6fvbj9Sfl
PJtyrS7b6uNUeXM8oBHA0VnFro6P1A2dSzD03BttfbgdNaSa2k6OfZY0R7idwrmArTs3o2F1
HDZ1F7sjqOPVXRblQXU0WOEAvP0a3WnvyqfVb8jB6jl5TKXjpOS4Y2bS8++26z2erh1mSS0H
X97twjv9imfSuuOtvyMQenflZD9uL1ItLKcutnIaYLTZU0xHBWJ0ejHrxDdfRddj9P305llZ
FFmM63+cAaPe4VjXkAdgtTJ6LkDCrm67qFPSg00Nx2tqDq2hzXNp9Ik+tpDnduyf6vfV85rr
crPfe6oPGzcX1i5hbJqua73WMqdo1ztT8ErABU731fs6m/FtZ1D3im11eNkOG191Tfo2PZ2P
n35VL6wZ1efg5mD0+0XuoaRn00v23tr7uqJ9pII4Oh4VzO6xhMzWdHryGVZdsAh24ANd+ax4
G0WRq0FYvTegZjc19VmVXk9Pxj6L8gkttNVe5xxrWABplz5e6dU0DXiOnZSvq3kuy+s02Wiq
otwv1ayhhZ9qpJaBZY0/QLCI2nudNF0Botzc3fkMLMTFd+hrd/hLB/hHD91v5v3rneqX9Oz8
/Fvrsvx8HFrczFy8SshzLmmNfaXOq28abStnpeV1XN6NtufUzqoAbaACPT3atc9nZ2w7tvil
LupK7/KXUNnOHgul/hZeOG/Cv8vwSV3ExasTHZj1fQrESeSe7j5k6lJNvp0U42T1rqmdh22d
BxHvewh+NddtFN7Wu2vaDu3Nntos7pozOvYmTfXmB/VMG4Pw8g1hno2OYN+O9g12T7XA/FXL
vq7nY2U/9jXfZ8XJrLHB1j/1dxf6j30V6t93EaQtLKuxOk++jGNuXn2R6dIaH3WNbq5xcWt0
a3UlOsD5f5eamDMbHwsLH6j1WLc3p9B35R9zxuH6QNOkglBdl43XKrulZLL+nZbmC6tryG2A
Ayy6pzHFp2uiRPxWDd1V/UeqZVLdoe9jxW3OfZVSKmsDLMd1TXAeruJJJ7QQtHoWF1LNo6Vl
5D2HGxR62PY7d9p2uYa/Refoka/S7wEaoWVK+r1fV8fqWRjZFQNL3H7c3iv1SJbk0ToWXj6b
fzXK2/M6P0vFv6T07Ox8LKoDn11XvltZcd8bXEe3XgcJ+o9cL8rGwul5WOLMh763XvPqNbYx
u5tRaxw9z9Y+CBfQfrFg34WTTVidWwrazYHsFte5pFjHCYLq7AEN9ToFObTd07qvRyz0X1Yz
CX9R6TU1xvyLrHeyXu9xqedQ7v4o3T68jHOLS12J1Lq+HvAxrcn9Jj0uMtraYfve0e0vIlC6
jluwXZ9pe7J6m6g05vVKm7aMJrh+ir2gk7QTLokjkoRbjP6VXhfZqcbq36OzpNOMfUuYdIvf
e0bSHEFzjPHKephgZGTbkNycZjG0dXyC23olVhLmtY6LMv1G7fTdubLhAB+K7TPybcTFfkVU
PyjXBNNUby2fcWg8kDsqto6T0bdl/Z2V5OW4Nf6Fc23P5gBg3O7lZHUsNvWMLI6h0TNyrL3F
rbMVl7qhDSPUq9N/828tnmEw+ojoFNXEy8C3CzasnEs6rg9RvfkY+VjMNvqF50qs2+6q2s+3
WEenK6xjY1HQrPSyc/IqstfXlPc2aJ2tx22sH6SwNMFyu9F6PdTdk59dI6X9oqFNGE0hzWhg
9t1zWna6z4du6zcTOxOpMr6Z1DHqpsdkvczLAe2nIcwn1LcS0EFlkjifGJCdY18FI8fAowDj
dUY25mRW4Y2NiZboyHXkGltZucdvosaZAaI7qXSKM7P6lVmMz8hlmRSHdRqZ6TS3YXeg76EO
a6HNkaon1hrszcbKuyr2jAq9MdOqcxttWSXM3fSH6Te53tBaRC1cPCo6D0i7JorusvNQcWWO
Ntktb+jpBMaNmAEidPEqbvU7shtLaMUH7Tku9Ot8SGD86w/1R+KSwvq19YsjLyvsltxzTa8y
XNFVtO2tr7A+uAdosdtE/ikmcJ+X6qeoeHFjg07XEGD4HxXEA9a6h1jH6f1bK+ydSpD7MWup
o9OWAGvIB/P3e5r28DhdyhPxsd91eQ+trrqQ4VWEDc0O0dtPaUIyq1OVh9GttycjM6xTjPfe
KwaawX1l1U/pT6g+kQY+CNnZ2M+z9kPLsdudS5mLlNj03OILTWxw4eBqB37KfX8TKzOl20Ys
OtJY70nHa2xrXBzqi4cB4ELCx6n5GaehZGFXj9OvqL/sVJBsxHNO5t7ra9Gl7j7QNREpw11J
U0H9Mz3Z1WHZRVez06MZpxqHCm6kPmy514d+jsqiRB5+K6AZGB0PItrazKzb3NZZmX/zz2Vi
W1l/BgQYDRPKazPwugdPq6TjXsuzqKg2iq2ZsP5rXuYIDn9p5KyOm5PVep9auy672YnVGUgn
AsadrK2vLXY+REOcdQ5rx46aI6nfZTs5uBg5fT68jCb9pwAXZP2LH2hmVY7VvqO7jdqQfmid
DwG9E6c85lrKvUsdc9m7bRR6hn0qt3DB+VH6J0+7AxbGXlgsutfe6ukEVMNhktZOsd1gdZ6p
ZnOwswYrW4Fdz21W5UPxrSZqHqhkmv3fRLhHwQFnS9O6kXU+uX9U6hTh1AdOfhZAjIfD3Oc4
ljLKOGvq1/SfGFs4GHnU9St6l1BuPjWW1NoeKHmL3g+x7t4bB7NGpWR0Hpr83HGH1agnBwmt
uYbajQ7GyRYXuqpsmXMaO/EKz1IYnXhfmV7er4mMBVh4VJdByLNDda7SNs+0jgSeUTWwU18b
ruZc265xyM7JfXYcvp7NtGPiME+19tjZ9QAeOvwVYtw6MCmqzqF9+QzDFnSaWUOL8djx7H2C
kOl5+juPaVZxa/0WRh9cvb1LB6W1v6495pDsgj3Yz/cG2xpq74HVVsjrOfk51fWsHBupbh1C
traA3IZkAmbKrX47nbQ0D2aaFO8lO30Xr2P1b7E+mnKrhhFjfQLMcWAQ4Oc5v5jgYhB6xkdN
y+p47M4B+HU2wVstAOPfa4AN2Wg7A9pBbD1dbkdJ6ViWXZWT9iq6i52Q1lzhWWOewOe1vge/
xWZ9W+oNz8enpuZY0EE34zh6bhlY8mPVaAQLBILxz3Te5AU3MOu7o3Qr8jJYKcj9J6Uzc6ut
xPo122MDnODJ1OsJKp1TNz6Tc7pLbasTpT3NyLvUbYCXAPs3UWavazd+8D4JJUd/G1PVpJJK
JSlmdb6iOl4rr6W1i+2yuovfoxnqO2Cy4t12tWmuO6ng0Y2VmHPrsruue6/A6rU11mpGmPc0
TxxtI2uHmnQAJ1UjzcLJyKXWY+czMHUL2vzcXDDA55x4a92NZa7Qt2tkfcug6L061lNGZ1Jj
XdVFbqnXmPV9Iu3NY9zNCQInzQehdEpoZRn2Msqvcw2DEcf0VD7gDcKmAe3ce3ZbaMpdApSw
8v6uPf8AaK8HKONiZ277XiuYLayX/TfVuI2OP3d4W4srrXX6OkmlhrdkW2uG6uuJZVuDX3On
hrd3zQjd6Kc7r/VMB3T8rpDDc2ulrKb8xtbraaSNpDbnN1gge+OAVXFfWcjLxXV5FjrC6qyo
4Q2dNrxwfeC4/wA64tEfkWi7G6h0nNuvwq/t3Ts231MnFEC2qyyA6yudHsPJafko9Sa/o+G7
E+r1Da8vLc+1rSCaato32WObw0GIAHJKeD0HVTHOq6aOtdIwajSGsddf9kj2u3NMWiAW7g6Y
nzT9OZTd9Yrs3p9D8bEbS6rMe5hqZdcHDYWtcBuLAD7vNZI6PSXYuR0TK+y5nU9me3GuaXUO
9La5za3ASzaHHSe/C2vrT1LpVXSsrDzMxuNfbSdrGuAsJOjQ0HmXaJdgNb0U1ndPu63mdQdn
ZORi/Y7vSxaq4bW2va1zbSHtLbN89/gq+Fdg4nS6+pfYKb+qG5+HjPxWMqde/e6v1Kzw3c1u
49kDoWNlZdP7Ntsrupq2N6j0vIebWsafc23FvadxYezXT4K79YTZiHH9Kh2Fj9PItw8+tvq0
MO0sdXfSyHtYWmNwR60pHRV0PqmdVRdXZXm7dubRlWOpus9Mez1K2Qy8T3CSudPoyusZeL1b
Odivx8RrnYYxHG1rrHjabTY4DgaAJIXrV9NlO+kkkolKSSSSUpJJJJSzjDSfAT4LhLer5Gf0
7qL3MGXFUdQtbsrsxRLi2utkTaGRv1OvZbv1rx8nIxWHHy7MMVte7IbssfXZSI312ek122fH
mJhYvQ7fqvbj0HqdFGPcHH7G3dvBxt01bjX/AIMO0b6gCkhQF7qej6Ng5rL7uo59tb7squqs
NoDhXtrB2vIfruduWM3MxsTrzur5GY21pttwc97d3pUNgPx63A6cgy7xK3+uNwX9KvZnPNWO
5sGxgcXNJ+i5grl24HiFg/V3Gbj59Ywsxmb0l2LFhuY6u9rd5NZt3Na1x3bh7od4pA7k/Z4K
bn1YwMOrEr6nY11LnGxuPW97jTWx9hj0G2fQFkAwsurEwcurM6pfnDD6zVZZ9tbkBr62tYSK
6rKLOWBgG0t181pfXOrHsw2fbrjRhNDtkNc4OyiIxtxrkgNdrxzChdbgO6lgftqnDY92M0v+
0mr1m5ALdoHuJIPwhEXqdVM+nXUYXScfOPTK8fqfUQKm42KAxzydzm+4xtG33GeFhY3Scmjq
f2XOwXZjrpsrozMgveWA+/0b2nY/bOrHtBhdX16iu44ba8k4nUBcXYFgYbGmwMdua9oH0CyZ
mEGqrMPVsO3rV9IvaLG4NGM1+1z9v6R73PnXbwEgTqa/l0UlzbKuh4WPh9JxqqrMm4UYtUbK
WvfLy5+3sACfNJZ313reMP1xbuY0sa/Fub+gdLtHte2LG2N7emS7ySQoV/W/FT//2Q0KZW5k
c3RyZWFtDWVuZG9iag0yNiAwIG9iag08PC9CaXRzUGVyQ29tcG9uZW50IDgvQ29sb3JTcGFj
ZSA2MDMgMCBSL0ZpbHRlci9GbGF0ZURlY29kZS9IZWlnaHQgMjk0L0xlbmd0aCAzNzYvU3Vi
dHlwZS9JbWFnZS9UeXBlL1hPYmplY3QvV2lkdGggNTI+PnN0cmVhbQ0KaN7s1OkzQlEYx/FK
CZWlRypLlpQtUqmQpSSSLVt2siWEsu87f7epezGMy/WCF+b3efWcufOdOffMPVcgAAAAAAD4
D4SiNDE7StKlGbyazCyZnB0V2Tm5vJo8JeWzo6qA1LwajZYKX5oiKv7bpkRXKi8tE/+gUZVX
6Imo0mCUcDZV7FhdwzS1dWSqbzA3ksXK2dia7EkOqZNpmltaXW2S9o5O4jh6jZs8Xd4UfTfT
KHypJz1q6uVs/H2BpH6L5/25DdAg596Ghq1JQdHIa6MYtY+NT1Dft2cQMrDN5NR0wO91e8jE
+6xdM+SZnZtfWOTfhJdoeUW4Gl6LfLG3D816lGyp9Qb/ZnOLIsllbJt/s2OmqEPl0+0S1/vE
3+6PL8HcH/ke+fcPtMrDo+PPm5PTs1Z2PK+XXaSu++XVNe0lbuJOju8gZHXE2PH2TnTPTC7j
w+OTQKgL4n8JAAAAAAAAAAAAAAAAAAAAAAAAAAAAv+VZgAEAYS8/FA0KZW5kc3RyZWFtDWVu
ZG9iag0yNyAwIG9iag08PC9CaXRzUGVyQ29tcG9uZW50IDgvQ29sb3JTcGFjZSA2MDIgMCBS
L0ZpbHRlci9EQ1REZWNvZGUvSGVpZ2h0IDEyNi9MZW5ndGggMTk2NC9TdWJ0eXBlL0ltYWdl
L1R5cGUvWE9iamVjdC9XaWR0aCAxMjA+PnN0cmVhbQ0K/9j/7gAOQWRvYmUAZIAAAAAB/9sA
hAAMCAgICQgMCQkMEQsKCxEVDwwMDxUYExMVExMYFxIUFBQUEhcXGxweHBsXJCQnJyQkNTMz
MzU7Ozs7Ozs7Ozs7AQ0LCw0ODRAODhAUDg8OFBQQEREQFB0UFBUUFB0lGhcXFxcaJSAjHh4e
IyAoKCUlKCgyMjAyMjs7Ozs7Ozs7Ozv/wAARCAB+AHgDASIAAhEBAxEB/8QBPwAAAQUBAQEB
AQEAAAAAAAAAAwABAgQFBgcICQoLAQABBQEBAQEBAQAAAAAAAAABAAIDBAUGBwgJCgsQAAEE
AQMCBAIFBwYIBQMMMwEAAhEDBCESMQVBUWETInGBMgYUkaGxQiMkFVLBYjM0coLRQwclklPw
4fFjczUWorKDJkSTVGRFwqN0NhfSVeJl8rOEw9N14/NGJ5SkhbSVxNTk9KW1xdXl9VZmdoaW
prbG1ub2N0dXZ3eHl6e3x9fn9xEAAgIBAgQEAwQFBgcHBgU1AQACEQMhMRIEQVFhcSITBTKB
kRShsUIjwVLR8DMkYuFygpJDUxVjczTxJQYWorKDByY1wtJEk1SjF2RFVTZ0ZeLys4TD03Xj
80aUpIW0lcTU5PSltcXV5fVWZnaGlqa2xtbm9ic3R1dnd4eXp7fH/9oADAMBAAIRAxEAPwD1
FJJJZ65SSSSSlJJJJKeezOj9X6eCfq9cBj22tddh2nRgLw6x2O530dwmWnTwhbtdFNTrH1Vt
Y612+wtABc6Il0cmAiJImRKlKvn51PT8O3Mvn06W7iBqXH81rR3LjoFYXPdd6mKup0YltTLW
VenfVQ4E233OeWVtp9zWjYdSTwlEWVOJfVl3el1ujH2evki8dSrabcuutwLDQ7HjXYRtImO8
Le6Ji4fSuk/bsmqnp2Ve2cix0ViSTs3NJhs8lo7qj0fEzszMNTtuLi9OzHZLqHychllgL/S3
NOw1u3l0+Gil9ZuptfbW6qma+m5DRZl3bTitte3b6drZ3xDx7gPaVIdfSpO/6ydRw6a35eGM
hlllbGZuETbjuY94a5xiXMIBnWR5roLvW9J/obTbtPph87d3bdGsLnugU225/wC0MXFZg4V1
bhkNptZbTdZI2vqbXoI1kwCUfrnWMjCy8N2C4ZhLntyen17XPdW0bn2tM6Or8O8wmkWaCnm2
fZH59Njazh9bxMtzGW5tluRh3XEbXV13A6EbtBAPZJbvSOii52PkjNbl9JqsflYVIZDvUsJO
658+4sLjGgPikn8QulPTFvcKKIolsp+TDesfsQCxSS4SVZKkkkklKSSSSUpVOo9K6f1SptWd
SLQx2+t2oexw/OY9sOafgVbSSBpTmWY9fRelZVvT6XW2ta66HF1j7Hgcuc4lzuFxrn42XmXX
PuflHdi3u6hjt9NlV7nbWepivdttggD6MxyvRVVu6X06/KqzLseuzJo/mrXNBc3vonxnV39q
nNuto+q3RyYfm3vsc4VsAa+66wl79rR7W9z5AJx0X6q55qyfseObspnrscAG2uDocXe2Hd9V
U6n1d7euMoFNN9lRDMHHeQ19rrmu32ttdo1jA0tMAlQ+rOBddZXdkWFrek2XY9GK5oNlTnfS
a65pixoafbAHmjWl3RU6tpwfq/g10YWP/PW+nj4zDG+20l30nnSYJJKSo9Q6x0fNodV1LDvP
TPU2tznM/Qh7HRvD63b2Q786AkhRrrxd1PTJJJK6tWIlRIIU0lHPEJ+B7pBRpKRb4KKqzhKJ
1SpJJJNUpJJJJSll/WLqjOm9Oc71hRfkOFGPY4EhtlmgcQ3WG8laiodS6Pi9R3Ov3b/RsorM
6NFohzw397TlGNXqp5XK6fR0zFu6G/HOW9tld/SHW1vs3uft9ZrbG6sduDjMiJXU2tHScFrO
nYfrbDP2Zjw17gdXuaX/AEnd9TqqPS8Xq2PlHO6s6qmvFxfs7nV2Oc20MO71ntcAGwAsPq5y
M++7qGNjm02it3Tr7C6vJpbTBsfRjuh1gIO7TnupNzupu49mHndQuwui51uDbk1vuy8G+oPa
wlwZZ+jsh1bzM6e0pLV6B6+XR9tzqg7Ia97MbKfV6Nz6DEOczls+CSV61/L7VO4kkkra1SSS
SSlJiAU6SBAIoqYFpCZETFoKgng6x+xNsEkiCElAQQaIpKkkkkFOd1222rp7y3GOZjuBbl1N
MWei4EPdWPznDwXPu6NVm/YmVdTOddY2t+Dc+GPoxWODn2VmsAl50bLl2KzumdCwumZGVkY+
4uyn7ocZFbZ3enX+63cSY80+MqCnRSSSTFJEkkloLVJJJJKUkkkkpSSSSSlKJaFJJCURLQi1
IyCEkRMWgqCXL/un6FNsEk5aQmUBiRuKSpJJJBSRJZf7ayf/ACqzfuq/9LJftrJ/8qs37qv/
AEstBa6iSy/21k/+VWb91X/pZF6Fl3ZvSMXLv/nbqw5+kanyCSm+kkkkpSSSSSlJJJJKUkkk
kpSYgFOkkQDupiW+CSkko/Zhd0mypJJJSIUoU01UVNppYK62CGsaIAHkppJKUkkkkpSSSSSl
JJJJKUkkkkpSSSSSlJJJJKUkkkkpSSSSSlJJJJKUkkkkpSSSSSlJJJJKUkkkkpSSSSSn/9kN
CmVuZHN0cmVhbQ1lbmRvYmoNMjggMCBvYmoNPDwvQml0c1BlckNvbXBvbmVudCA4L0NvbG9y
U3BhY2UgNjAyIDAgUi9GaWx0ZXIvRENURGVjb2RlL0hlaWdodCAxMjYvTGVuZ3RoIDMyOTAv
U3VidHlwZS9JbWFnZS9UeXBlL1hPYmplY3QvV2lkdGggMTIwPj5zdHJlYW0NCv/Y/+4ADkFk
b2JlAGSAAAAAAf/bAIQADAgICAkIDAkJDBELCgsRFQ8MDA8VGBMTFRMTGBcSFBQUFBIXFxsc
HhwbFyQkJyckJDUzMzM1Ozs7Ozs7Ozs7OwENCwsNDg0QDg4QFA4PDhQUEBEREBQdFBQVFBQd
JRoXFxcXGiUgIx4eHiMgKCglJSgoMjIwMjI7Ozs7Ozs7Ozs7/8AAEQgAfgB4AwEiAAIRAQMR
Af/EAT8AAAEFAQEBAQEBAAAAAAAAAAMAAQIEBQYHCAkKCwEAAQUBAQEBAQEAAAAAAAAAAQAC
AwQFBgcICQoLEAABBAEDAgQCBQcGCAUDDDMBAAIRAwQhEjEFQVFhEyJxgTIGFJGhsUIjJBVS
wWIzNHKC0UMHJZJT8OHxY3M1FqKygyZEk1RkRcKjdDYX0lXiZfKzhMPTdePzRieUpIW0lcTU
5PSltcXV5fVWZnaGlqa2xtbm9jdHV2d3h5ent8fX5/cRAAICAQIEBAMEBQYHBwYFNQEAAhED
ITESBEFRYXEiEwUygZEUobFCI8FS0fAzJGLhcoKSQ1MVY3M08SUGFqKygwcmNcLSRJNUoxdk
RVU2dGXi8rOEw9N14/NGlKSFtJXE1OT0pbXF1eX1VmZ2hpamtsbW5vYnN0dXZ3eHl6e3x//a
AAwDAQACEQMRAD8A9VSSSSUpJJJJSkkkklKSSSSUpJJJJSkkkklKSSSSUpJJJJSkkkklKSSS
SUpJJJJSlGx+ytz+doJj4BSQ8j+Ys/qO/IkmOpHm8Vg/XH60dR9azA6dVfXSYc1syJmPzteF
sfVv62M6yLqLafs+bjgufXMggaGJ10PZcj9UfrEzozMxhxbcl9zmlgqEgFu7Q/etn6n9K6g7
OzeuZtJxxkNf6VbhBO87iY8AqeLJMmFSMib4xWgD0fxDkuXxw5niwQwRxiH3fJGXqnI1ceG9
fsdT6p/WTL64/MbkVsr+zuaGbJ13buZPko/WD6zZfS+tYPT6aq315W3e50yNz9mkFch9V8j6
x02Zn7EpZdLh624Axq7byQp9Uv65d9YemO61U2m4PrFYaAJb6nOhPdD35e0Pm4r+atN+66Xw
rCOfyfzPsjGSMPH6weDfh331e4+sH1jo6MxlfpPyMu8E00MB1juT4Kr9UPrHl9dZkuya2Vmh
zQ0MnvPMkrbya6zXZaWg2NrcGvgSAR2K4/8AxafzfUP+MZ+QqaRmM0BxemXFp5BzMOPl5/De
YmMX67CcX6wyv55dB0FO19ZPrM3o5qxsek5Wfk/zVI4iYkxrqeyS5jrFvUX/AF8/Ua2W5VbQ
2htn0R7J3fKZSUfvT9zrw8fBVafb3bv+jcH3LaPvfdvvXHx+u9+Hg/drr3fREkklbefUkkkk
pSSSSSlKFzS6l7RqS0gDzIU0klA0beS+oPSuodPZnfbsd1Bsews3jmN0wursBLHAckEBSSTM
cBCIiOjY5vmpcznlnkBGU60jtoK/Y8j9Q+ldR6fZnnNofQLXN2b+8bpj71H619J6ll/WPpmT
jY77aKtnqWN4bFm4z8l2CSb7EfbGOzQN/jbP/pPL97lzfBHjnEwMdeHWPC4v1hzuuY3p19Lw
RmMta4WuJ+j2HcLmPqzT9auiWPrb0svrybGm17zG0TBIh3mu9x8ijJqF2O8WVOna9pkGDBRE
pYuKQnxnTaqTh5/2cE+WPL45CemQz4uKRidL16PH/WXo/V6Ou0fWDpNP2lzABbSOZGnHcEJL
sEkvYjx8Vnfi4enF3V/pTL939nghxe37Hu0eP2rvh7KSSSUrnqSSSSUpJJJJSkkkklKSUHW1
s+k4BBfn0N4lyIiTsEEgdWykqD+ou/MaB8UJ2bkO/Oj4JwxyRxhD9Wf0VObhnQ4uXa0Dwa8+
o38HLXdbU3lwHzXLYj319d6hUSf07Krx5mNjvyLRkoYsfpon5SY/YWfnJ3mMq/nIwyfWcRI/
i6rsvHb+d9ySyUlJ7Q8Wtxl3EklFz2sEuIA81CyMklVsz6W6Nlx+4KtZn3O0b7R5JwhI+C0z
AdJzmtEuIA80B+bQzg7j5LNc97jLiSVFPGIdStMz0bj+ovP0GgfHVAfk3P5cY8EJJPEQNgtM
ieq5JPKZJLvHcchFCkkkklObk/ouv4dnbIptpPxbDwtJZvW/0f2LK/0GUyT5Pln8VpnlMhpK
Y8RL7R/Y2c+uLl5/1JYz5wkT+UgskkkntZtWZ9rtGe0fiq7nucZcST5qKSAAGwSSTupJJJFC
kklXzcq3GY004tuXY87W11Rp5uc4gNCSmwkqPTOoXZbsinKpGNlYrwLKQ4WANeNzDvGmoV5J
TX6lRZkdPyKKnmuyytwa5uhmP48Lkuk9Vqxeo12WAVs2vqqxaXuyr3F0FtLnMGyK3SWy6V23
muVsxuoY9gwmV2W9LwbvtEltdDdHeoN1xcS5rZ7N1Ql0SHqGO3Ma6C3cAdrtCJ7FOh477LKh
ZZsl5JaayS0sOrTr4hERQ0OvVGzpGUG/SYz1G/FhDv4K5RaLqKrW8WMa4fMSntrFtT6jxY1z
T8xCpdAsL+kY4d9KsGp3xYS3+CZtl/vR/wCif7Wz83Kf7LL/AOlY/wDoDfSSST2spJJJJSk/
KZJJTi5H1gupa/MOPW3pdN3oWZD7Q2wuDtjnMriIDvOVbzLaM/pF9uK991ZY5zDS51bnlmu1
rhBgkdlh/WHpL29Srs6eKGZec8Eeo0uI2/zlm6ya6wBxDZJW50VldWDILt4c71913rkPbo73
/LiAgLshLifVe2+jN+xVuZdRc03WGqotY1paC1/qkkuO6WEOM6LT+sPVnYLaaqbvRtteN5bU
654rPt/RtHt3F0D3FZDqMrPty7sbCtOT62/G6hc80V11Agt2VfS0Ej6PuXS3tx+odOdva6yi
5nqAMlrjHuBZwQZGiA2pJ3cr6vi4Z+Y3Ldm/aHBtjG5jmgGs+0uZXV7G+4fFT68czp1d3VcX
JqorJrGVXdUHtc2Qwv3bgZDTwsvoGfk19Urbc6u93UAzaC99t7aiHuHvdpFbmw8QNStT604t
dtWFkXPfXRi5LXX2V6uax4Ld+od9ExrGiXRXVsdEyuqZTLLMytjcbQYtoa6p1g7uNTpLW+C0
nvZWwvscGMHLnEAD5lcn0PGuf1LHyaK8q4MuyA/qNz3OruxSC2uN7vpbuPb5o31nOLjdRqys
tlL6nVRGVLgdroc2hk7d4DtxnmEQdEVq9HjZWLlVi7FtZfVMb63Bw+8Kj0X9G/Pxf9DkuI+F
gD/4qr092XZ0Si/prGVPoe6KWM9Ou+thLZDTq3cNQqtnV6xkZt+KffnUViqs6OF270nNI8RK
hyZBGUSdKv6gjp9ab/KcrPLhyxhUuPhH92cZiuL/AATI35vTAgiWkEHuNQkg4WK3Dw6cVvFT
A0nxPc/ekprPDdeqtvHs0+GHucPEfb4q4614b+avLokuNldT3MrNj2gltc7dx8JPCwHZfVX9
YxKMzJrqY8udZg4bpdWGjcH5FpGrOx4T/Ux9L8K3068iqxrw2wZDnOLj+a6Xx7o+lCyesO6T
U7qDrG3ZGG/SpmJ7amXGQ77SWe7cH6++RCRulge0quqvrFtL22Vu+i9hlp7aEKSrdMEdOxmk
scW1MDnVQGEgCS3bpEqyihyvrJhNysAWGuu44r/V9K52ypwgtd6jhqAAZB8ULo+Nd0ltlnUr
2O+0sa917AGUMFY2t3PeQXWOB1dGq2nbdp3xtjWeI+a5Gk9DpZb+3xZkdRYbQDmSGWMBOw0e
tsqEtQO6ejudXZsrd1BuY3p9TK/1nJaxr7HVjVrWOfoOfBZX1Yuw2ZNtz8q7Jzc8iK3Pdf6N
TdWNsePY155P3Iz2s/5k1jOdVP2dhrOQJr380h++PIarGsowmP2PyL7bLaK34NjmvFdeYHD9
HWKWio7jHE/FA7hPR6XLt6TgNsZm5NWPZa8vZ6QFd20uDtoFcudMa+Kbp/WLs7H6i6phN2K9
/wBnY9jqy9jmb6iWP11481PLyMhttZxMTGt6o+sG0XWNY9mmg9oc9wmYhA6X+2B1UvzzQ627
Hacqqloa6hwM1Ne7c4vn3BHqjo51rel19Ib1GrOst6u9odS/1nGx2R2q9AGI3e0t28LX61jX
5ONik1OdtsacptEesGEe4VOPHu5jWFTfQzK6zkelk09PurIYwYzKbMqzTWx5h7gJ0iJ8Vfab
W9Oc3rID3VW7Q9mnqw4ek8NafaXeCA6pZdLpsxbsrGdY51LXtdi12WepY2sthxJPu2l3EoVv
QMV/WKuqN9rmSbK40c+Pa7+9Ver5vVXstrwenWV5Q9M+sbahZtDwY2VOsdtOo10W9M6xBPI8
E2YxkDjr5gY8Wnq6UzctLmYmZ5fjs45Rye2OL9WR6uKunipJJJSNd//ZDQplbmRzdHJlYW0N
ZW5kb2JqDTI5IDAgb2JqDTw8L0JpdHNQZXJDb21wb25lbnQgOC9Db2xvclNwYWNlIDYwMiAw
IFIvRmlsdGVyL0RDVERlY29kZS9IZWlnaHQgMTI2L0xlbmd0aCA2MTY2L1N1YnR5cGUvSW1h
Z2UvVHlwZS9YT2JqZWN0L1dpZHRoIDEyMD4+c3RyZWFtDQr/2P/uAA5BZG9iZQBkgAAAAAH/
2wCEAAwICAgJCAwJCQwRCwoLERUPDAwPFRgTExUTExgXEhQUFBQSFxcbHB4cGxckJCcnJCQ1
MzMzNTs7Ozs7Ozs7OzsBDQsLDQ4NEA4OEBQODw4UFBARERAUHRQUFRQUHSUaFxcXFxolICMe
Hh4jICgoJSUoKDIyMDIyOzs7Ozs7Ozs7O//AABEIAH4AeAMBIgACEQEDEQH/xAE/AAABBQEB
AQEBAQAAAAAAAAADAAECBAUGBwgJCgsBAAEFAQEBAQEBAAAAAAAAAAEAAgMEBQYHCAkKCxAA
AQQBAwIEAgUHBggFAwwzAQACEQMEIRIxBUFRYRMicYEyBhSRobFCIyQVUsFiMzRygtFDByWS
U/Dh8WNzNRaisoMmRJNUZEXCo3Q2F9JV4mXys4TD03Xj80YnlKSFtJXE1OT0pbXF1eX1VmZ2
hpamtsbW5vY3R1dnd4eXp7fH1+f3EQACAgECBAQDBAUGBwcGBTUBAAIRAyExEgRBUWFxIhMF
MoGRFKGxQiPBUtHwMyRi4XKCkkNTFWNzNPElBhaisoMHJjXC0kSTVKMXZEVVNnRl4vKzhMPT
dePzRpSkhbSVxNTk9KW1xdXl9VZmdoaWprbG1ub2JzdHV2d3h5ent8f/2gAMAwEAAhEDEQA/
ANbp9l9XVrckZH2ppBb1XI2CrFqFQPp10k6lzSdefNXfrFjvuw6r6mOsbVY11voAHIdUeRQ4
8E6cdkfqFXVTLOnGv9ONrnZGtVIAPubU0S8unxWF0644mdWMl+QbrGWV9c+0bvSaGj9Hcx+j
GtJMNDexU+2jF4ux0dxxw3FOF+zqHhz8eouL7DGtj7nCWtJ83SruTm0YzKnvlwvsbVVsG6XP
+j8lz/XsR+NiNvzs3dgUWMDOmVzWyyiduw6+pY+DK0sbJ6Z1fGtwGUFldTR6ePb+jcWD6Dwx
p3sE8HQo30R4suidaPVBZup9BzA2xgDt4Nby4NnQQ6W6hZ31m6a1gu6lTh4c1s9W3KynPIL2
6NHos0c7wJQas63pmVj1DKY+mh4qysTFpd9moqOhfbe6XFzfMrc6t0+zqFFLaXsZZTa2+s2t
L6iW8b2NI3cyPNDcJ2LU6Fl22M+y9Q+0jNuZ6jqspjWt2RBbUaxs268TKFRRkvy3dN6dfXi1
dLaKfWsYLsh28B+1m6AGAEa90LB6z1/Jz/scY1tmPa5me1rLGtpY0/TNjnEbnjVrUfq3TsZ3
VsfL9TIrvzg3Eb9leKiWtmxzrH6yAPml0U2cTqwqwsu3qT2D9nWuoyLqwdjo2kODBMSHCR4r
CxcurEzxfTVm24XTyGtZkBlLMdmW6N7Wn9I8eE8BW8B1tldnRH4tVGHccjFLqnPsc29o3brX
u0O8GZ8UHqGcynGsuswMnMsfjswMhzooqucDDfT9T3ucXcQEip2b+ndSqybrul5dVDMlwfbX
dUbAHxtL64c3kDUFWMHp7MTEdjuech1pe++ywCbH2fTLgNIPgovs6o3CoNGNWcpzWiyu2wht
emsuDSXQq3T8bqNXUrbc3Orc7IZvPT6gdgj272mwl3xjRFDRy+rvwar8DqHS668YU7rDj3MD
XVvJZDGvDCTpwNVu4NjbsOi1lb6mOY0trtEPaI0Dh4rGy68KrqtuS+jK6l1Fo/V4q31Y7SPa
GTtZzySZUMvD6hnYLM7Px7Kctjmi/EF4DHVt5LYMNLvMpspGIJA4q6M2DFDLkjCc/aEtOKr1
+pH5vRAgzBBjmNUlh9CvxMZ11JdXijJtBx8X1BY8aQZInkpJvvD2+PS/3b/kfwZ/uEvvPs3L
gq/c4elX34d/T81X1dpltT3FrHgvaAXMkbm7tRuHIWP1lnVc94xaaGV4ONY26+3KftZds9wY
0Nk7QdSSszomV0votrcZuPkXdT6i9rr3MrdMdj+kO7Yz948ro+o4GFmVt+2h1lFBNjqgSGPg
fntH0h5KTcNLYvNZufV1Wyu6wBtmI/8ATW4Yc42Yp0sOPa9k+xxG7Z2UelfZ8C3Hyj6eLgU3
XinLsLhkZVVmjWGot3u935x8E+JZbiV9Mvyrmspba/I6d02qsuzCyzcGY7RP0NplG6RntL7s
0dNyc7ql9r9l7miAyYaz1XnbVs+i4eKb1S6HWsPMybG01Muyca5snEY5tGPPc5Fo97p/dCvd
MvyL8Z1eYxlOVSTVdXU6Wt/dLDzBbxKqNz8myvKpzWen1DAaMr0Md5hzILmN3HVwkQ7RZuV1
HqLrK8ii4VvGAzOFWMwPZfa54YWWaFxEaBOvqhzsrpmLVZZ03KyMxnT6XF2RcWPDXl3uIrbW
IPnY8nyW5dkdL6x9W73dKa3LpxGkUNsDwA+kdjo7juCrnUcXpD2jqPVda62N/R2Pc6pp8BUD
tc6THCfE6tivtqx24t2LXdLcd1tXpMeQN21o7GPEIVSbcgW5dHTcVmLiOxS3bbRk41gGG5ry
HOdkeodwBHO771d6h0zPyepjqb+o1Y2FjsAxhsDjWXD32h1h2bjwD4KBxOvix+HU1jan5D7n
5tpbZU+kg7aPQOo7CBpomzOlfY8HBDzTl1YUtdTkk11OfYfY4AB2rSYaCElN/BNN2FZTgdSO
TbPuynObc9rnfyRAjwWQx3Rm532nq1+Wb8G51VeVlnZSLBE7fShonwcp9Kzd3VTk5VPpC6cG
izHr2425rtxb6hO5zpEA7Y8FQy/2P0nruRWaKc5z2MuNdz33Xl+rXhgIeJ0BghK9lU9Tl39S
Hpjp1FV7XjcbbbdjG+GjWuLpVHFwuojEzKs+6jqG52+vF1Dayfd6b7HEuLfCUW7MdkdKry67
bOkMJG71qQbAD7QwMOgJPCzMQdPZ1K257s7IfkuODZ1Cza2h1hBbs2s28HQEt5SlqK7hOOXD
KMtuEg/Ym6F9ls6jZY04lbxXtGPjAkaH6e5wEkcaJImBivrtwrrcht+PQXUYgpqLTJG0m0+Q
CSq0fZqhfFfTtd707PHD77x8cuH2+D9Lfi4OG+Hi212u9LQdM6b1vp7b8PEprrstte+zq17x
aXMcfZtZ9NzgP3jC38WmyjHZU+1+Q9g911kbnHxO0ALO6Z1F7cI05LvtHUaGue7Fa9j8j090
V79p27oiUD0sqrK/bvVbz0+lgDXYdLnPZHAdku1Bj+SIHirY0cRL1LpvSMXHvzbAce71G3fa
2S+71AfY1kydfo7RohU4nVMn17t37Excl4ssrZDshxjaXOc72VF3g3VaOXj43Vun7a7Zqt22
UZFRBhzDuY9vYwQqzei2ZFzb+sZLs81HdVQ1vp0AjhxraTvd8SlSmeN0Dp2Fk1ZeMHVXVhzb
bXOLnXB41FznyXaiQhGo9Oyn1dF6UDkXAOsyCRVQJMwXauP9VoWJ+1MHqFubbk413UcjGsew
U2TVi0Vt+iXyQAY1dILlbry25XRqMbHvtyhhmt+eKS6p9lDg7+ZfZtLmzGs6gIWOiaLYwOmZ
bq8jpmZc1tlF7czFvoghjnkv2it5Jhjp+l4rOp6v9m6lY/qnq9RzMa59FDKXNe9v8tmKwCNz
T9KSidPxLOmPr6xltczGc+125jTbkenZo37Xa1xBYwDtwmz30YGS+qip+HTbew2DAY7176Nk
h7LG+L3awZhJTvZdjqsrCy/c2t59C5rtIFolhcPEOEKfVqWW4F28PJpHrM9OA8Pq97SydJkK
hgNszui5GI+1z72OeK22ODr64O+lt0fniBytTDyG5eHTkR/PMBcPA8OHyMo/tQ8lj5GFj4/7
TGW85bD9rZg559Kv3iS6iuv2lzp0InVdLfZVRbh5jKWMdkPFVthaBY0XCR7v6wErIdm0Y+/p
JxfWtpyPRw8Ots3Mx43euyywFs9xr5K+as676vPblB32trTZWHx6n6N3qVb9um6AJhAJLo5e
LVmUOx7dwa4ghzTDmuaZa5p7EFZvT+g4lV/2t2XfmkWGxrXvApFoMF/p1hrd09/FalFzb6a7
2GW2ta8H+sJVTpn6O/Pxu1WR6jR/JuaHj8ZTkOf1XpJrtqyZyszHNjvtGOx50a4e3Y1saApI
f1lbiNNk5OR9rcGurxqy8siddGDuPNJU6h7/AA0O/wAw32/tp3uLN/o33eOe3B/Nyrh+a9+H
+rx14OdgZdFHUX1U4D67qsl78Wpr21tr3M/SU2Xatc5+rvTkx4rVu9DqdmNZfZZlU5zHPwun
AenVNbdzvtDm/S10108ke3pFFFrHX5TxgjI9dmIWtDBe86bn/SLdx4Ku5/TcTMobVbWf0Pup
9Jxqe0xEMeyNs8K2AXCtodF6nnX2NryaKqaHh7KhQCG021O2voeToT3aQrnVcf1qJtyn4mJX
Lsn0tHPYB9Hf9Jo8duqy7Om9Zu6aMDGxMTAqYRZjza99jLGnc15c1sF08rfq9X0mettNu0ep
t+juj3RPaUggvH9Vzq8SrG6l0LGtbT05rw6uzHeMeyu2GucSYduHM91PBuZXS1jq6MnFrP7O
suLyL7W5B3u9KoS3Y0v9oPZb/Ua+rZJsx6hi14b27XWX7rHPnkbG7QPvXJ9NqwMHKuxem7s7
qtlhqxMsMLKsZwG51QsyC4eJgCU06FI2bGTi09OwLsRtWQRiNbVm249vpYri4wz1WmT9GN5Y
Fo1WdQ6o/EycW9+NXjvtxLn4j92P7QHV3Btmj2abTKsZHTAMZvUuqVtyc6gNfktoc9lNgYfp
GuYcWDiVssFRrAYG+k4aBoAaWu8h4ogKJc/A6dm19Qf1DMtodY6r0R9mYaw8bt/qWyTLvBE6
d+gyczC4Fdnr1D/g7vd+DwQl0hzmUWYbzL8Kw0yeSz6VZ/zSlmfoOoYeXw2wuxbT5P8AdWf8
5qKGXUrrMcY+S1xFbLmsvHjXZ7Nfg4hXYEweOCgZ2P8AasO/G4NrHNB8HR7T96j0/IOVg0Xn
Rz2DePBw9rh8iEVIejSzEdin6WHbZR/ZaZZ/0SEh+i644dsrGB/tUug/9F4Sp/Q9Zyavzcqp
l7f6zP0T/wAIS6j+jy+n5HZtxpcfK5paP+kAgpJnX59JacOiu2Qd9lr/AEw34pKr9YqQ/CZa
9zPSosD7KrS5rLBwGnZrykouKXvcNmqurH5V+1ve1j+4+7wx4uLg4uGV3d1xcVXX9Wq8UHRc
rFysN3TMq9t1zjYBVvNhFU+1nrRD3MHcLQwLrRvwsk7sjGj3n/CVn6Fn8D5rmK8qvDudtxmY
wpzQ3Fpc9zcLHf6Za/fc0RuP7rdJW8y6zPwMbq+NWWZLGl7av32TD657h0S35KUFokNrOyLc
X0siZxmu25LY1DXaCwf1Tz5K0h1WUZeMLGxZRc3g9wdCCPwKrdOc6lz+nWkl+MAaXHl9B+gf
i36JRUy6pguz8M0MeGWNey2suBLd1bg9oeBy0xqsk4doN3WMl9eRfVkNsux6QRUxtQ2OgO1L
wDu3LoVRyYwssZkfq2TFWWOwd9Gu0/8AUuQIUG7LLGzo+t4+ILXD+IVLpRdVXbgPMvwn7Gk8
mp3uqd92nyS6bNDremv5xSDST3pfqz/N+ilmfq2dj5vFdn6rkfB5mpx+D9PmipVv6v1am3iv
NZ6D/wDjK5fWfmNwRepY7snBupZpYW7qj4PZ72H7wm6pQ+7CsFX89VF1P9es7x98Qj4+QzIo
qyK/o2tD2/MSkpjh5IysWnJbp6rA+PAnkfIqt039Dfm4fAqt9WsfyLhv/B0hLpv6C7LweBTZ
6tQ/4O73j7nSEr/0HV8a783Krfjv/rN/SV/9+CSldQ/RZmBldhacd5/k3CB/0mhP1tjj0y97
fp07bm+RrcH/AJAVLq1Lrum5DWa2Nb6lcc7qzvb+RGY6vMxA7mvJrn5Pb/tSU1+rNxrumWW3
OcypjReHs1c0t97SEkukkX9JoZcA+GGm0HUE1k1uB+5JM4fXx6fLXize9/R/ZuX85x7+mqrb
e3KoxGZGGzq1zLXM9Y5F2CDFD3NJachtT27tR7tpK6FjmOY19ZBY4AsLeIPEKOPkVZNQuqMt
dI10II0LXDsQqmP+o5X2M6Y15LsQ9mu5fT/FqcNGFQ/UM3bxiZrpb4V3nt8LPyqfUarA1mZQ
3dkYhLg0cvrP85X8xx5o+Rj15ND6LRLLBBjkeBHmCg4GRa9r8fIP61jENsP77T9CweTh+KKm
xVbXfUy6o7q7GhzHeIKVlddtbqrW7q7AWvae4PKp4/6lmuwzpj5O63F8Gv5tq/78PmrySHFd
ZZiua+0l13TPba7vbh2aB/mWd/Mea1crHZl41mO4+25pAcO0/RcPgdUDqVDnMblVM33Y4M1/
6Spwiyo/EceaH0a9rqDjB2/7PHpPP51D9anfd7T5hDwSn6bkvyMRj7NL2E13jwsrO135JQum
D0LMnp/Aof6lI/4K73N+524JN/VerOZxV1Bu9vgLqxDv85kfclm/q+diZnDHk4tx/k2a1k/B
4/FFSsv9B1LEyuG3bsW3+176z/nCE/WWu+wPuZ/OYrm5DP8ArZ3O/wCjKJ1PHfkYF1bP51o9
So+D6zvb+IRMe6vMxa7vzMisOI8nDUJKStcyxoe3VjwCPgQqPRSWYjsY/Sw7X0f2Wncz/okJ
+jOcMEY7/p4j3Y7v+tmG/wDRhNR+h6zk1fm5VVd7f6zP0b/4FLspXTP0dudjf6LIL2j+TcBY
PxlJJv6Lrjx2ysYO+LqXbT/0XBJBSsgHBvdmsH6taR9sYPzTwLh+R33qzlY1eXjmpxgOh1dj
eWuGrXtPko4uS3JrcHN2WsOy+l2pa7w8wex7oGOTg3jCef1e2ThvP5p5NJPly3yRUmwcl99b
mXgNyqDsvaOJ7PH8lw1CHn1WMczPx27r8cEPYObKjq9nxHLfNLOrfTY3qFDS6ykbb6xzZTyR
/Wby1W67GWMbbW4OY8BzHDgg8FJTWyamdQw2ux3jcdt2LaOzxq0/wKJhZQysdtsbH6ttr7te
3RzfvVer9RzPs/GLluLqPBlp1fX8HctSt/Us8ZHGPmEV3+DbeK3/ANr6J+SSm8sLK/yR1OrI
GmJcXA+DQ8y9nyd7x81uqv1DCqz8SzFt0Dx7Xd2uH0XfJIqDDqlFluIX06347hfR5uZrH9oS
E97K+p9NcKj7cmsOqd3DvpMPxDlW+r2Zddhuxsr25uA/7PkN/q/Qf8HNRen/AKtkZHT+GsPr
4/8AxVh1aP6r5Q/apP0/KOVh05BEPc33t8Ht9rx94QOl/oX5WD2x7S+of8Fd+kb9xkJYn6v1
HKxOGWxlU/2vbaB8Ha/NLJ/QdUxcnhmQ12LZ8f5yo/eCPmipVP6DrGRVw3Lrbez+sz9HZ+G0
pdQ/RZeBldm2mh5/k3CB/wBNoS6mfRtw83gU3Cuw/wDB3DYfuMFT6vS67puQxv8AOMb6jI53
VnePyJKYdQ/R5nT8jsLnUuP8m5pA/wCkAkodUf8AaeiuyqtS1teVX8WFtiSHX8VdE+Xj2725
mIAcmsQWcC2vnYfP90qRGN1LD5Pp2d+Hse0/g5pQsHcza3Hm3AsBNLjo6uPzffBcw/m/3Jj7
M6yzC/SHc1ubSNBJGj2uMN3tHInhFSXCybXF+NkwMqiN5Gge0/Rtb5Hv4FCp/UMv7MdMXKcX
Y57MsOrqvg7lql1BrTbSaXBue3c7HEH3NH02PjhrvE91LN+z2YJ+2TSx4b5vY8kbduyZcHcQ
kpLlY1eVQ6iyQHahw5a4atcPMFAocM7Fuw8wD1mfoslo8SPbY3yd9II+Ick0NGU3be2WvIiH
R+eI43eCrZXtz67Mb35TG/p6RpvoJjVx9oLTq2T4pKSdOvsfW/HyDOVin07T+8PzLP7Q/FWl
Ryvb1GmzG9+S1sX1DTdQ4xuJOgLXaiT4q8khzM2r7H1Grq1elVgGPnj+QT+it/sOMHyKL1P9
XdR1Ef8AaZ227zps9r/80w5W8j0fs9v2iPQ2O9Xdxtj3T8lUxNOmPrzdcdjHNFrvz6Nste4H
UHboZCSVdU/QOxs8f9prA20jvVb7HfcYKJ1Wh9+Ba2v+drAtpP8ALrO9v3xCDjgHormZ5ipt
TmPsd+dUB7bCOdW9jqrHTTf9ho+0CLQwB0940Dv7Q1SUwuDOp9Kd6Z0yqdzD4OI3NPyciYGQ
MrCoyDzYwF48HRDh96B0WRjPbX7sdt1n2V/71ZdPB10dIS6RAryG1644yLDQ/sWky8ePtfuS
Ux6VWHdPtwH8Y77cVw/kfm/9BwSUsTTqueK9anCovPZtoEFvzbBSQ6K6v//ZDQplbmRzdHJl
YW0NZW5kb2JqDTMwIDAgb2JqDTw8L0JpdHNQZXJDb21wb25lbnQgOC9Db2xvclNwYWNlIDYw
MiAwIFIvRmlsdGVyL0RDVERlY29kZS9IZWlnaHQgMTI2L0xlbmd0aCA0MTc1L1N1YnR5cGUv
SW1hZ2UvVHlwZS9YT2JqZWN0L1dpZHRoIDEyMD4+c3RyZWFtDQr/2P/uAA5BZG9iZQBkgAAA
AAH/2wCEAAwICAgJCAwJCQwRCwoLERUPDAwPFRgTExUTExgXEhQUFBQSFxcbHB4cGxckJCcn
JCQ1MzMzNTs7Ozs7Ozs7OzsBDQsLDQ4NEA4OEBQODw4UFBARERAUHRQUFRQUHSUaFxcXFxol
ICMeHh4jICgoJSUoKDIyMDIyOzs7Ozs7Ozs7O//AABEIAH4AeAMBIgACEQEDEQH/xAE/AAAB
BQEBAQEBAQAAAAAAAAADAAECBAUGBwgJCgsBAAEFAQEBAQEBAAAAAAAAAAEAAgMEBQYHCAkK
CxAAAQQBAwIEAgUHBggFAwwzAQACEQMEIRIxBUFRYRMicYEyBhSRobFCIyQVUsFiMzRygtFD
ByWSU/Dh8WNzNRaisoMmRJNUZEXCo3Q2F9JV4mXys4TD03Xj80YnlKSFtJXE1OT0pbXF1eX1
VmZ2hpamtsbW5vY3R1dnd4eXp7fH1+f3EQACAgECBAQDBAUGBwcGBTUBAAIRAyExEgRBUWFx
IhMFMoGRFKGxQiPBUtHwMyRi4XKCkkNTFWNzNPElBhaisoMHJjXC0kSTVKMXZEVVNnRl4vKz
hMPTdePzRpSkhbSVxNTk9KW1xdXl9VZmdoaWprbG1ub2JzdHV2d3h5ent8f/2gAMAwEAAhED
EQA/AOtDqs+t2Ne005NRDnMB9zHD6Nlbu48Cnqs9XfgZ7QbS0z+5bXxvb/EdkTKxW3hr2uNV
9etVzeWnwPi09wgSMwfZckfZ82n3sc3sRxbUe7fEfIqywssayzGtGDkOLp/otx/PaPzHfy2/
iFFn+T8gVHTCyXfoj2qtdrs/qv7eacEZjH4OaPTya4dLNJj6N1R+P3J6nfaWWdPzwDcG++NB
Yztaz+PgUlMcn9Ryvto0xryGZY/ddwy7+DlctqrtrdVa0OrsBa5p4IKq4r3S/p2Z+ksa32ud
xdSdN3xHDk2E52PaenXEnYN2K88vq/d/rM4PkkpjjtFlV3Sc073MZDXHmyk6Mf8A1m8HzROn
X2PrfjZBnJxT6dh/eH5ln9ofinz8eyxrMjH/AKVjEuq/lA/TrPk4fiq997CynrOMCWMbtyGd
zST7gR+9W7X70lOkqOV+p5rM0aUX7acryPFVn3+0q8CHAOaZaRII4IPdRuqrvqfTaN1djS14
8ikhps/VerPr4qzm+qzyurEPH9psFLD/AFfqGXicMtjKp+D/AG2D5OE/NVn/AGizBfS47uod
Ke2xh7vDNWO/64yQfNGzbq9mH1aozXW5u8/8DfDXfcYKCWf9H6z/ACM+r/wWn+9h/BL+Y60e
zc2if+uUGP8AqXJ+sBzMVuWzV+FY28ebW6WD/MJUerODKaM5moxbWWyP9G/9G/8A6LklL5X6
HqmFf+bcLMZ/zHqM/FpST9aY79nvtZq/Gc3IZ8anB35JSS6q6N1CycWvJYA4lj2HdVa3RzHe
I/uV3KxXVHc3Vh7+Croggi1EU57t2Q5uLlH0M+qX497OHR+ez/vzE53Zo9N8Y/UsU7muGoBP
5zf3q391byMarJr9OwHQ7mOGjmuHDmnsQqLxa+xmPkvFeayTh5gHts8WuHifzm9+QkpIZ6hR
p+r5+K6QDr6dkfix4+8JOnqOKHV/oM3GfIB5ruby0+LXD7woF1t7vXpaKupYo23UE6PYfzZ7
tdy13ZO+wODeq4bS4gbMqj85zG8tI/fr7IKbWHlNyqBaBseCW21nlj26OaVXdGDmbiP1PNdF
gPDLjpP9Wzg+ajdYzHsb1Sg78W8NGVHG38y4f1eHeXwV2+mrIpfTaN1VrYcPI9wipqYE4tz+
mvPtrHqYhPekn6HxrOnwhXllEZNtRqJ3dT6a4PqcdPVYdAfhY32nzWjjZFeTQzIq+hYJE8jx
B8wdEgprdQBxrK+psE+gNmS0fnUOOp/sH3fehYlNZGZ0h+tJBfQexovk6f1XStIgEEESDoQe
CCsNxPT8isOJjBdDXfvYdx2/+BPhAqdDplhycBteRrZXux8gH95nsd941Qun1/aOl2dPuMup
9TEs8Ybox3+aQVOv9W6vbX/g85guZ4epX7X/AHtgpN/V+subwzOqDx/xlPtP3tISUz6bZ9q6
ZULhLiw03D+Uya3j8ElDB/Q5+di8Bzm5NY8rRtf9zmpJdFPTsfXcyRq08hUMrENcvZqzw8EO
m59Lpbx3C0qrWXMlvzCr48n+8zSjbjqF9FWRUarm7mO+RBHBB7EK/l4eybKx7e48FTVgEEWG
EgguZay6u2tl1m3Ibph5pGj5/wADd5n8eRqkLnNsfm01ltrCG9Qw+XacWN8SBwfzgtG2qu6t
1VrQ+t4hzTwVmX134lrHGz3M9uNlv4IP+AyPI/muSUkY6nFeHNIf0zNOh5bW9/8A3yz8CiYZ
diXHp1hJaAX4bz3rHNZ82fkVZtlFbbS9kYNxLMzGdzj2O5P9R3+1TNVjx+zrbIyaf02BlH84
N4nzbw7xCSmxn02+zMxhOTjSQ0f4Ss/Tr+fI80HFuqqymuqM4XUv0lB7NuiXs8t/PxlWsLK+
007y307WEsur7ssb9If3eSpZWK2ux2KTsxs526iwf4HKHuEeTzqPP4oqdRUer4vr4/qsbvso
Djs/frcNttf9pvHmjYOS7JomwbL6ya8hn7tjefkeQrKSHCryTd0irLa71L+l2Bznd3VtEOP9
qp0q91Yxi151XuOJY28Ed6z7X/exyoVsHTOv/Z3D9R6s1wrHYWtklnzBMK90todh29Pu9xxX
Oxng96yPYfmwoJXyyKuo4WU0+y3djPPiLBvrP+c38UlVDbb+g2UTOVgEsB778c7mH5tASS/3
1O0pVWvqcHNMKKSoNh1aL2XN057tVXLw9s2VjTuPBVWPcxwc0wQtLHyW3CDo/uPFTY8lFbKN
uUmexj2OY9ocxwhzTqCD2Kv5eHE2VjTu1UVZBBFhhIouPlY92A8XMO+kDYHv1AYf8Df4s/dd
+b8FGs1vrZjh5rr3/qVzvp49w/wFnl4eI0W0QCCCJB0IPBCxM/AfhbrqGerhuG26jwb4fBv5
p5b8EipN9pdW89Q2bH1xT1SgdgPo2jx28z3b8Fo5FFWVjups1rtH0m9u7XNPiOQsejJc8svq
Pr3sYQJ/7U44+lW4f6Wv/XQq3066upzcVjt+Nc02YFn8j86o+bPyfBIKQVZFmNk+tkaWNLcf
qEaAz/MZI8jwf9i2VQ6pjbm/amM9R1bSy+of4Wh302fEfSal0nJ31HGc/wBR9AaWWf6Sl381
Z92h8wkpfrHTzn4LqqztyayLsWz926v3M+/gqvi5QfmY2bGxvUqvSuZ+7kVSdp843N+S1Vjd
QofTbdVV/wBqP1vF8smn3PYP67RKR7qDbr/V+sWM/Mzqha3/AIyr2P8AvaQkodQubZhY3Vad
W47mZAj/AEbxtsH+a5JL/fU6fn2KS53A6q/As+zZJL8KYFm0tsoJ7XVHVrD+8JaPguhBBAIM
g6gjhUCGwukHFpkGCEkklOjjZYsAY/R/5ULLw+bKh/WaqYMahXsXMDoZYdezlLjyEFbKNuek
r+XhzNlQ17t/uVFWoyBFhhIpwep9LtxHOzOntcapD78dn0mubxdT/Kb4dwg05NOTSXteGV2O
FhsZxTeT7Mhngx50eOxXRrD6r0e2mx3UOmMDnGTkYke2wO+mWjxcPpDv8UiFAurhZRyKiXt9
O+o7L6/3Xjn5HkeSy8tj+mZjL6mk1S51TR+673XUf9/Z5yFXwOotY5mVWXOa1uyxp+m6lvLX
f8JR+LVu5FFWZjGsu9rwHV2N7H6THt+CW6tkrHssY2ys7mPAc1w4IOoKB1DGfkYxFRi+oi3H
d4WM1H38FUOi5L6rremZA22VkurHbxe1vlrub5HyWujupyei21ZOJkYZH6MElrDyKrpO3+y7
c1JBu/yZ9YaLOMbqO6vyFh90fN2o+JSQ8PorxdN9XTuqVB8tvDfo2sMPb8HDUfBU6MfqPSHk
Mec3pmpLCIvp82xo9vlyo3/VqoWev0/Kuwrxw4HePmHakfNSqyPrFhENzcdnUah/2oxDstjx
dS+Af7JVFsOrXZXbW22pwfW8S1w1BCkshmXjNudZ0943uO6/p9n6J7j3fW18Q/8AArTovqyK
hbUZadDOhBHLXA8EIKSJJJJKbmLmRFdh07OU8rEDx6lf0uSB3VBWsXL2RXYfb2PgpMeQgolE
FqEEGCmWllYgtHqV/T/Ks4ggwdCFbjISDAQQ4nWOkW+o7qHTgRfo6+hv+E28PZ4WN/6XBTdA
6nXYBiyAx0mgfuuGrqtfvb93Zbaw+u9JtBPUenNIvZ7rqWcvjXez+W3nzSI6hXgm67h27GdS
xB+tYkOIH5zB/d+SVoYWZVnYlWVSfZaJjwPdvyKB0fqdXU8JuQwgvHttaOzv7iqOMP2L1g4h
06f1NxdjHtXkDV1f9oahLx7q8G51zpx6j02yis7chkW4z/3bWe5n38FJX0ka1tTS+y9Wq/mc
5to/dyKgf+lUWJfaOsVfzuHXeP3se2D/AJtoar49wluo8RqEln22HLyM/p1zfT6liW1j/h6S
4DzD2bo+KBjY2Cy92T0XPaLHCH4z7PUqfHG4OO9p8wtuSgX4OFk/0jHrtPi5gJ+RiUrUwoz2
vsGPkMOLlHip/D/Op/Dh+KtLMv8Aq7066s1t9Wlh1212uifEBxd+ClVX1Lp1Ybvf1PHbzvgZ
DR5EQ2z8qSnRSQcbLx8phfQ8PAMOHDmnwc06g/FGSU2sTL2fo7D7ex8FYycVtw3N0f4+KzVb
xMrbFdh07HwUmOZBRKNtNzXNcWuEEdky1cjGbcJ4eOCsyyt1bi1wghWoyEmGUacHOxT0bNd1
rDaTi2f8pY7R+af8Mxo7jkrRz8LH6r091Bf7LQLKLm8tcPdXY0+RVvyOoPIKzsWsdKs+ykn7
Bc8/ZSf8C52vok/uk/R+5FCTpGbbl4xbkgMzcZ3o5bB2sb+cP5Lx7gkoZtYw8sdVYDt2inNa
O9c+2yPGs/gkl4KZnonTgd1LHYzv3qHur/AHb+CX2HqFf9H6g8js3IY20f5w2u/FaBa0cOB+
9MqGrYaHq9aq+nj0ZI8arDW7/NsEf9JL9rtr/pWLk43i41l7f86rd+RX0hPb8ElNWjqnTsg7
acmtz/3C4Nd82ugq12kajxVXO/Zez9f+z7f+G2f9+WbWzoT3kYL8ip/jievH/Ra5qWinTycC
m94uaXUZLdG5Fej/AIO7OHkUH7bkYnt6kwenwMyoH0/+uN5Z+RJuJ1RgDqM7eOzMqoH8W7Hf
el9o6xVpbiVXt7upt26ebbgB+KKm81zXNDmkOa4S1wMgjyKdY2GRc6yzpIfjFp/SU2AOxXnv
tdW5wB82fctTHstsr3XVGizgsLmuHxaWnj4oKdTCyN49N3I4PkjX47LmwdHDgrPxd3rs26mV
qqbGZeNrZU49tT6nbXD4FBtqrurdVa0PreIc09wtjJFBZFxgdj3WW8NDiGu3DsdR+VWIkncU
xEVsWjj2Pps+wZZ9QOBGPa7/AAjI1Y7+W0feEkTPGK7GLcklrC5oY5s7w+fYWRJ3T4JJyH//
2Q0KZW5kc3RyZWFtDWVuZG9iag0zMSAwIG9iag08PC9CaXRzUGVyQ29tcG9uZW50IDgvQ29s
b3JTcGFjZSA2MDIgMCBSL0ZpbHRlci9EQ1REZWNvZGUvSGVpZ2h0IDEyNi9MZW5ndGggMTYy
MS9TdWJ0eXBlL0ltYWdlL1R5cGUvWE9iamVjdC9XaWR0aCAxMjA+PnN0cmVhbQ0K/9j/7gAO
QWRvYmUAZIAAAAAB/9sAhAAMCAgICQgMCQkMEQsKCxEVDwwMDxUYExMVExMYFxIUFBQUEhcX
GxweHBsXJCQnJyQkNTMzMzU7Ozs7Ozs7Ozs7AQ0LCw0ODRAODhAUDg8OFBQQEREQFB0UFBUU
FB0lGhcXFxcaJSAjHh4eIyAoKCUlKCgyMjAyMjs7Ozs7Ozs7Ozv/wAARCAB+AHgDASIAAhEB
AxEB/8QBPwAAAQUBAQEBAQEAAAAAAAAAAwABAgQFBgcICQoLAQABBQEBAQEBAQAAAAAAAAAB
AAIDBAUGBwgJCgsQAAEEAQMCBAIFBwYIBQMMMwEAAhEDBCESMQVBUWETInGBMgYUkaGxQiMk
FVLBYjM0coLRQwclklPw4fFjczUWorKDJkSTVGRFwqN0NhfSVeJl8rOEw9N14/NGJ5SkhbSV
xNTk9KW1xdXl9VZmdoaWprbG1ub2N0dXZ3eHl6e3x9fn9xEAAgIBAgQEAwQFBgcHBgU1AQAC
EQMhMRIEQVFhcSITBTKBkRShsUIjwVLR8DMkYuFygpJDUxVjczTxJQYWorKDByY1wtJEk1Sj
F2RFVTZ0ZeLys4TD03Xj80aUpIW0lcTU5PSltcXV5fVWZnaGlqa2xtbm9ic3R1dnd4eXp7fH
/9oADAMBAAIRAxEAPwD1QgHnVQdj0u5YPlomqyabOHQfAoqRHcKB7NZ2DSeJCE7px/Nf96vJ
JvCOybLmuwbxwAfghux7m8sK1kkPbCrcYtcOQm14WyWtPIBUDRSeWBD2/FVvPZHSemZJm7Fr
c794N2n72wqv/N+irI+1YeTkY18QSH+o1w7NeyyZC6g4dB/Nj5qJwKfEpcEk2HAb1C7EcB1K
sVtnTLrk0n+t3r+enmukptbbUyxpDmvAIIMgoQwKO8kdweCqzukvxnGzpNgxjy7HcN1Dv7H5
nxanRiQgl0kK/HZc2Do4cFVKerNbY3H6hWcPIdo3eZref+Ds4PwMFaCcDWoQ49tL6nbXD4FJ
atlbLG7XiQkpfd021WcGvg46PTmW16Tub4FV0lIQDusBp1acuq3SdrvAo6xFZozn1w1/ub+K
jlj7LxPu6SShXdXaJYZ8u6mol6kkkklKSSSSUpJJJJSO6im+t1VzG2Vu0cxwkH5FUPsWdga9
Os9agf8AaO9x0HhVaZLfg6QtNJJTTxOqY2S80ODqMpol2NaNrx5js4ebUkXLwcXNrDMmsPA1
a7hzT4tcNQfgkkpyklQZ1VtYH26s4wd9G8H1KHfC1vH9qFfa5rmhzSHNOocDIPzCssCkkkkl
Mmuc0y0wVdx86SGW89nf3qgnAPYIGIO6QSHbSVei5jMdpteG+biB+VDu6x0mj+ezKWfGxv8A
eoCKNMwbiSzD9YukfmXOu/4quyz/AKhpS/bjXfzOFmXDxbTtH/ghagp00lmftLqr/wCa6W+D
3strZ+EuKXq/WJ/0aMWkfy7HuP3NYB+KSnTSWZ9n+sDz7szHqHhXQXH732fwS/ZfUHn9L1S8
j92tlVY/BhP4pKdNJZn7Ax3fz2Tl3A8h974+5pCSSnlq8vod4dZ0x2RRYSQ5uNU8tJ8HVlpq
KHRV1mu0nDxLKZ1Fo20Mcf8AhMZ7nt+bSF0g9oDW6NHAGgSVimG3Prd9YXVt9VmHW+PcQ6x+
v9WB+VS+z9Zf9PNqr/4qjX73vcrySNKaP7OynfzvUch39QV1/wDUNUqug417wyyzIvnn1Lnn
8hCutaXENAknhamLjilmv0zyU2RACYgktSr6u9EraAMOt4H+kBs/6suVurBwqP5nHqr/AKjG
t/IEdJQMqwAHAhOkkkpSSSSSlJJJJKUkkkkpw0kklZYFKTWOe4NaJJT1VPtdtaPmtPHx2Ut0
1ceXJspCPmujG2ONitpG52rzyfBWEklCSSbLIBSkkkkEqSSSSUpJJJJSkkkklKSSSSU4aPj4
r7jPDO5RsbBLofboOzVeADRAEAcBTSyVoGOMO7GuplTdrBAU0klCyKSSSSUpJJJJSkkkklKS
SSSUpJJJJSkkkklKSSSSUpJJJJSkkkklKSSSSUpJJJJSkkkklKSSSSUpJJJJSkkkklKSSSSU
pJJJJSkkkklKSSSSUpJJJJSkxMJGeygZ7qOcyNIxJPlokLl0pJklXvJxXrxeSdH/2Q0KZW5k
c3RyZWFtDWVuZG9iag0zMiAwIG9iag08PC9CaXRzUGVyQ29tcG9uZW50IDgvQ29sb3JTcGFj
ZSA2MDIgMCBSL0ZpbHRlci9EQ1REZWNvZGUvSGVpZ2h0IDEyNi9MZW5ndGggMzA4Ni9TdWJ0
eXBlL0ltYWdlL1R5cGUvWE9iamVjdC9XaWR0aCAxMjA+PnN0cmVhbQ0K/9j/7gAOQWRvYmUA
ZIAAAAAB/9sAhAAMCAgICQgMCQkMEQsKCxEVDwwMDxUYExMVExMYFxIUFBQUEhcXGxweHBsX
JCQnJyQkNTMzMzU7Ozs7Ozs7Ozs7AQ0LCw0ODRAODhAUDg8OFBQQEREQFB0UFBUUFB0lGhcX
FxcaJSAjHh4eIyAoKCUlKCgyMjAyMjs7Ozs7Ozs7Ozv/wAARCAB+AHgDASIAAhEBAxEB/8QB
PwAAAQUBAQEBAQEAAAAAAAAAAwABAgQFBgcICQoLAQABBQEBAQEBAQAAAAAAAAABAAIDBAUG
BwgJCgsQAAEEAQMCBAIFBwYIBQMMMwEAAhEDBCESMQVBUWETInGBMgYUkaGxQiMkFVLBYjM0
coLRQwclklPw4fFjczUWorKDJkSTVGRFwqN0NhfSVeJl8rOEw9N14/NGJ5SkhbSVxNTk9KW1
xdXl9VZmdoaWprbG1ub2N0dXZ3eHl6e3x9fn9xEAAgIBAgQEAwQFBgcHBgU1AQACEQMhMRIE
QVFhcSITBTKBkRShsUIjwVLR8DMkYuFygpJDUxVjczTxJQYWorKDByY1wtJEk1SjF2RFVTZ0
ZeLys4TD03Xj80aUpIW0lcTU5PSltcXV5fVWZnaGlqa2xtbm9ic3R1dnd4eXp7fH/9oADAMB
AAIRAxEAPwD1VJJJJSkkkklKSSSSUpJJJJSkkxcFEuKjllhHrfkmmRICiXeCZJQzzyO2iaUk
kkoVKSSSSUkSUd6bcVbOeA8UUzTKElJMPMDoFUz3BNvUUk055nagml9xTSUklGZyO5KlJJJJ
qlJJJJKUkkkkpSSSSSlJJJJKUkkkkpSSSSSlJJJJKUkkkkpSSSSSlJKF11VFTrrntrrYJe9x
gADuSVnNysvqjQcEnGwnCftbh+ksaf8AQsdwD+875BEBSXO6iGXN6fiOa/qFwJZWTOxg+la8
eDZ+aSq9Ow8erreT6DYbjUsrc46udZaTY5znHUmAEk6ht4Wp2UkkkxSkkkklKSSSSUpJJJJS
kkkDMzsPBpN+Zc2isfnPMT5Ack/BJSdUsrqbK7Ti4zDlZn+iYYDfOx/DB+KDPUOpfR3YGGfz
uMiweX+jH4/BW66cPp2K702tporBe8/DUucTqT5lOoDfXwU42f0+3OyKMPOsGRdf+ktrbpTT
Q0+7a3u5x9u53muga0NAa0Q0CAB2AVDpNVj22dQvaW35pDw08sqH80z7tT5lWOo5H2XAyMjv
VW5zR4kDQfekTZAU1Oh/pKsrLP8A2qybHN/qsPpN/wColJWelY/2XpuNj966mgz4xr+KSV+p
TaSSSTVKSSQrsnGx2l99rKmjlz3Bo+8lKlJUlmu+sHTJ202Oyn9m47HWz8CwbfxVXL+sOZWR
Xj9OsfdZ/NVWvax7vPY3e5o83ABHhKncQMrNxMNm/KuZSDoNxgk+DRyT8FjZeT1SvHZZ1XJG
I+47acHAG+6xx4YLHySfEgAKu+jH6OGZr8YX9czP0WHjlxsc0nsbHSYHL3fcnCCm3lfWK0ud
Xh472MZWbbcq8bWsZw0iv6bi4/RGkqrgdLfkZlTc4nIymEZWdbZqWkmaMdnZoH0iB4J66WYo
s+0POQ3DcMjPt735jo9OpvkzSB8FtdLxLMfG3X65WQ43ZLv5buw8mj2hE0BopuLM6h+u5dXT
G61CL8z+oD7K/wC24fcFeysmrFx7Mi0xXU0ud8uw+KrdKx7a6HZGQIyst3q3D92R7a/7DdEw
aaqbyzOvfpManDH/AGryKqiP5Id6j/watNZuT+m67iVcjGqsyHeTnxUz8NyUd1Okkkkgp5K3
q+Thv9LO6/Vbkn6ONg4ossPiNoNhTvd1m6s3W5GR07H7X5lldTifKippP3uCvdPwbKmbOkYN
fSqHfSyLm7r3eezn/Pd8lbOH0vp/65nW+rcOMjJdudPhW3gfBoUtjspxMbpGXluD25GZmDX9
Zy7X0Ua/uUVbXv8AnCtn6v8A1b6UP2h1Y1WWM19W8DaP6lev8Snz/rHlOubh9Ood9psE1scJ
uI/e9I6Vt/lWEfAovT/q4z1W5/WHfa84e4bzvrrP8ndEkeMIEnqa8lM8bN6j1QAdOoPT+nHj
KubttePGmnsP5T/uUcnLxOkTjYFRy+pXnUE7nuceDbYdfkn6h1p1hbj4BP6ZxrZc0S6xw5bQ
D4fnPPtb5o2JhYvSMd+XkkG6Pe8S6J/MZOpJPfklL+VKa9GK3pYd1Xqj/tfVLhsaezZ19Gkc
Nb+8fvVbGF7d/W8gC3qGX+g6dWeAHcFo7Dv/AFQjNou6pnkZIhrADkM7VsPubjj+U/mw+GiI
7LDjb1fbvqpnH6bUPz3uOwvH9d3tHkEv5f2KXxcNr8urCafUo6efWybD/hMp/uE/Cd33LbVX
puGcTFbW877nE2Xv/esfq8/epZ2WzDxbMh43bB7WDlzjo1o8ydE06mlNTK/X+pV4Q1x8Tbfk
+BfzTX/34/JaaqdMxH4uNFx3ZNzjbkP8bHan5DgK2ge3ZSlmdNIyOqdRygQ5rHsxWHw9Ju54
/wA56P1PLfjUBtMHJvd6WO0/vH84+TR7iqn1Vxm4/RaoJcbn2XF55dve4h58yIRGkSe+inXS
SSTVOPk9WyX1epS0YWLx9ryQdzp/0VH0nHwn7lk0053U8g/YN9YHtt6rkw+4eLaW/RZ8G/Na
GN0i/OtGV1Bz9h4D/ba4eG1ulTP5LdT3K08jKxsCuuljJe4baMaoDc6PAdgO54UlgaDdSHDw
OmdCxHubDAfdfkWHdZY7xe86uKzuq9RtsaxltbyLzGL01pi28/vXkfQr8vv8FLNyLKbW25O3
J6jp6GM3Wqjd9HT855+/4BXOk9JOM5+bmO9XPvH6Sx2u0fuNQ21OpUrpvThgsfndQe1+Y5n6
W0aV1VjUVVD81jfxVfIyL8h9WSGfpLXbemYzvGNcm0fyRqPAeZRrrq87fk3u2dJxZcSeLnM/
O82NPH7xU8X2Nu6xn/o3OYS1rv8ABUDUN/rHl3nol4ndSK+j0KKejYryb8qXZF35wZP6a0/y
nEwP9inTVXk9RaytoGF0obK2jg3kR/4Gwx8ShNtvxsS3qNjP8o9Qc1mPUeW7tKa/7I9zvmtL
BxG4eLXjtO4tEveeXPdq9x+J1SJoKbCzHfr/AFUM5xunEOd4OyHD2j+w0z8SrPUsw4eK6xg3
3OIror/esfowffz5J+n4Yw8RlG7e/V1tnd9jjue4/Epo0FqbKSSz+q22Wen02hxbdmSHuHLK
R/OP/wC+jzKQFlTRybzdj53WP8HTVZTgD4+11n9t+g8gtfBoGNhUY4ECqtjI+AAVHrNVbcLF
6fU0NruvppDB2Y07z9wYtVEnRSkkkk1TRyc+x1pxMBouyR/OOP8AN1A97CO/g0aqhbazCNra
bDdmGBlZzxu2k/RYxo5cfzWD5qwwh+KynpIFeIQTbks1eI+k1rD7vUPi4IHShhOfRa8hgcXD
Cx9SGkfTL3cG495Mp4qlNnpXTPSP2rIafWMljHHcWbuXOd+dY784/IaJ73O6lc7DpJGJWYy7
RpuP+hYf+qPyR+ofa3MFOPNbXz62QNSxg52N+kXHtoqWYb/2TVT0JsV3ew5I19Gv8+zafe5/
gAJ3cpddd1JA1nUMoUsA/Z2C4AgfRsubwwfya/y/BPlf5Qz24I1xsUtty/Bz+aqv+/H5KeA7
Gq6LW7ozPXpbX+rNB27j/KL4g7vpTqgY4tr6TczAd6+cXubfaRtIvcf0j3B0H29h4RCX+8FJ
Mf8AX+pvyjrj4U04/gbTpa/+z9EfNaaq9MGK3Aobhu344bDHagnxJnWZ5Us92U3Es+xt3ZDh
tZqAGk6bzP7vKadSpqVfr/VHX843Tya6vB15EWO/sD2/GVpqp0tuK3ApbiO30tbAeQQSQfcX
A6yXTKtpFTGyxlVbrbHBrGAuc48ADUlUelVvtNnUr2ltuXHptPLKR/Nt+J+kfMqPWZc2qu/2
dPDg/Lt5BAI2VwJMOd9IxELQe4trc5jd5a0lrAQC4gaAEwNUenmpzMq6u/6wYWG0y/FrsyrA
O24eiyfjuK1VzH1WD/2t1J2aSOpubU7IYfzQ7c7a0/usnaPGJXTpS6DwUpJJJNU//9kNCmVu
ZHN0cmVhbQ1lbmRvYmoNMzMgMCBvYmoNPDwvQml0c1BlckNvbXBvbmVudCA4L0NvbG9yU3Bh
Y2UgNjAyIDAgUi9GaWx0ZXIvRENURGVjb2RlL0hlaWdodCAxMjYvTGVuZ3RoIDUyMjQvU3Vi
dHlwZS9JbWFnZS9UeXBlL1hPYmplY3QvV2lkdGggMTIwPj5zdHJlYW0NCv/Y/+4ADkFkb2Jl
AGSAAAAAAf/bAIQADAgICAkIDAkJDBELCgsRFQ8MDA8VGBMTFRMTGBcSFBQUFBIXFxscHhwb
FyQkJyckJDUzMzM1Ozs7Ozs7Ozs7OwENCwsNDg0QDg4QFA4PDhQUEBEREBQdFBQVFBQdJRoX
FxcXGiUgIx4eHiMgKCglJSgoMjIwMjI7Ozs7Ozs7Ozs7/8AAEQgAfgB4AwEiAAIRAQMRAf/E
AT8AAAEFAQEBAQEBAAAAAAAAAAMAAQIEBQYHCAkKCwEAAQUBAQEBAQEAAAAAAAAAAQACAwQF
BgcICQoLEAABBAEDAgQCBQcGCAUDDDMBAAIRAwQhEjEFQVFhEyJxgTIGFJGhsUIjJBVSwWIz
NHKC0UMHJZJT8OHxY3M1FqKygyZEk1RkRcKjdDYX0lXiZfKzhMPTdePzRieUpIW0lcTU5PSl
tcXV5fVWZnaGlqa2xtbm9jdHV2d3h5ent8fX5/cRAAICAQIEBAMEBQYHBwYFNQEAAhEDITES
BEFRYXEiEwUygZEUobFCI8FS0fAzJGLhcoKSQ1MVY3M08SUGFqKygwcmNcLSRJNUoxdkRVU2
dGXi8rOEw9N14/NGlKSFtJXE1OT0pbXF1eX1VmZ2hpamtsbW5vYnN0dXZ3eHl6e3x//aAAwD
AQACEQMRAD8A7fHxG5Rspqc5+MXfrmWfp5DxoWNI/MHBj4BaWVk04WOHFs8MpqZy5x0axoUr
LMbCxi90VUUt0AGgA0AACrYlFttv7RzRsfB9Cl3FLDyT/Ld+cfkqO/kuY1MGFVb1HqDgch4H
qEahjfzaq/n95VLouPd1HPf17MEaGrAqPFdf5zvi7xQ8l9nWsyuisluN9Nvb9EPa64+b/o1/
Ny1s3Ib0/DAoYDYdtOLSOC8+1jfgO/kj+ZUgyP8AKHUW4g1xcMttyT2dbzXX8vpH5JH9f6sB
zjdOMnwdkOH/AHxp+8pOnpHS4Z+my7DAnm3ItPP3/grXT8MYWIyid7xLrLDy57jue4/ElA6D
8ApsrMd+v9VDOcbpxDn+Dshw9o/sNM/Eqz1HMOHiutY3fc4hlFf71jtGN+9P0/DGHiMo3b36
uts7uscdz3fMoDQWpsqNj2VsdZYQ1jAXOceABqSpLN6jOblV9Lb/ADUC7NI/0YPtr/tuH3Sk
Bal+lMfe6zqlwLbMqBS08sob/Nj4u+kfiqX1kudl3Y31fpdDs878tw5Zis1s+G/6K2r76sah
99p211NLnHwAXLYhvdh9U+sFwjJzR9nxQfzWT6bAP7R/BOjqb+xTa+quuZ1S7huVZXdU3sK9
pqYB5bWLo1j9Mobi9WvxWaNrxMZoHk3ez+C2EJ7qUkkkmqc3HY/qNzM24FuLWZxKXaFx/wBM
8f8AUj5oHVcxlwtp1OHjkDKLebbD9HGZ5uP0vuVvPybS9uBhmMm4S5/Iqr4Nh8+zR4qrgY1N
+Q30h+odPJZROvqX/wCEtJ77eAfGU8dz9FNvpmG/HpdZfH2rIIfeRwDENrb/ACWDQIOJ/lDP
dnnXGxt1WIOzncW2/wDfR81Pqt1jhX0/GdtyMuQXjmuofzln3aDzT51n2DBrxsJoFz9uPiM8
HERPwaPcUPzKkdX6/wBUdfzjYE10+DrnCLH/ANke371poGFi14eLXjV6trEbjyTy5x8ydULq
mVZj4wZRrlZDhTjj+W7874NEuKG5oKQVfr/VHXnXGwCa6vB15EWP/sD2/etNAw8WvDxa8avV
tYjceSeS4+ZOqOkSpDl5VeJjWZNv0KxMDkns0eZOiB0vFtpoddkf0vKd6uQfAn6LB5MGiDZ/
lDqYqGuL08h9ng68iWN/sD3fGFczctmHi2ZLxIYNGjlzjo1o8ydEeld1OP8AWK+zJtr6XjnV
zmeof5b/AObb/ZALz8B4qxmUVsu6X0uoRWx/quH8jHbIn4uIQeiYllmbbk3kPfQXNc4cHIsg
3EeTBFY+BVrH/T9dy7uW4lTMdn9Z/wClf+G1HbTsFKrkfWTI8HYdX4WW/wB601m8fWI/y8Mf
9Gz/AGrSTZdPJSkkkkFONZVdQ0YVVm/qXUCX5OQPzGDR7x4Bo9rAtNrcbBxNoirHx2fINaOV
X6ZjWtFmZlCMvKhz2/uMH0Kh/VHPmhZv6/ms6c3XHp23Zp7HvXV/aI3Hy+KcdTXbdTPpVVlh
s6lkNLbsuPTYeWUj+bZ8T9I+ZUMP9e6hZnnWjG3UYngT/hrPvG0fBF6tkWspZi4xjKzHelUf
3Ry+z+w3VWcbHqxsevHpG2upoa0eQSJ0vupKszD/AF7qFnUDrRj7sfE8yDF1nzI2j4InVr7W
1MxMcxk5jvSrI5a3/CWf2W/irePRVjUV49Q211NDWjyCGw81JFU6lmOxMYurG/IsIqx6/wB6
x2jfkOT5K2szF/X+oPzjrj4pdTi+Dn8W2/8AfR80h37KbWBhtw8VlAO9wl1th5e92r3n4lZf
Vst1mQ51Y3swC0Vs7WZlntqb/Y3Sf9i0+pZhxMV1jBvueRXRX+9Y/Ro/ifJZ2Dhg51eNu9Sv
pw9W9/8ApMu4SXH+q0z806PUlToYtFXTenNrc6W0MLrbD3d9J7j8TJVD6pWW5HSnZ1385m5F
18EQQ1zyGN+TRCX1oyizHxsJhh/UMhlRH/Btm23/AKDIVn6vsDejYhAgPZ6gH/GE2f8Afkv0
b7lTG3T6xY/8rEt/6Nlf9601mZAj6wYTvHHyG/8ASqP8Fppp6eSlJJJIKa+fmNw8V15G92ja
6xy97tGMHxKh03EdiY0Wu35FpNuRZ42O5+Q4Hkq9X+UOpHIOuLgksp8H3cPf/Y+iPOVPq1tj
219PodtvzCWlw5ZUP51/3aDzKdXT7VMOnfruXb1R2tetGH/xbT73/wBtw+4BaXGpUaqq6amV
VNDa62hrGjgACAFR6s993p9MpJFuZIscOWUt/nHfP6I+KG5Ux6aDmZFvVXfQfNOGPClp1f8A
23a/CFpqNdbK2NrrAaxgDWtHAA0ATuc1jS9xDWtEuJ4AHdImypo9VvtDGYWMduVmEsY4fmMH
85Z/ZHHnCt49FWNRXj0t211NDWDyCo9La7Jss6raCDkDZjNPLaAfb83n3H5IvVcqymhtWP8A
0rKd6OOPBx5f8GD3I/1VNO/KY/Jv6lZ7sTpgcyhv7950e4fD6A85V3pWK/Fw2i7XItJuyHeN
jzud93Cp/ZazlYnSadcbBa3IyCfznA/og7zc6Xn4K91POq6d0/IzrfoY9bnkeJA0aPidET0A
6qeZ6zlfauvZNlbtzOj4V8AcetY0Aj4jc2Pmuqw6hTh0UjiutjR8mgLjun4tzOmZb79crJfj
V3Hxsvsbfb9ws2/JdvxolPYBTm5unWunO8W3t/6LT/BaSzOomOrdJPjZc3/wFx/gtNNOw8lK
SSSQUhx6KMPGZTX7KaWwJ8BySfyqn0oHKst6rYP6R7MYH82hv0f88+77kXqlGRlUsxatKrnh
uS+YIqGrgPN30Vca1rWhrRDWiABwAE7p4lSz3tYxz3na1oJcTwAOSqHSWOvdb1S0Q/LgUg8t
ob/Nj+19I/FN1MnLvq6Uz6Nv6XLI7UtP0f8Arjvb8JWiAAAAIA0ACGw81LrN6mTmX19KYfbY
PUyyO1IP0fjYdPhKu5WTVi49mRcYrqaXO+XYeZVbpWNbXU/JyRGXln1Lh+6PzK/7DdEhpqpu
gAAACANAAsrGurvvyOs3GMbHa6vFPbY3W20f1iIHkEbq1tjm19Px3bb80lm4csqH87Z8hoPM
oWfVXY/E6LQNtJAsvaO1FUQ3+26B96IH4/kpL0amwY7su8RkZrvXsB5aCIrZ/ZZCzPrOft+Z
hdFbrXba23K/qNO4NPx2ldC97K2OsedrGAucfADUrk67LLD1Hqzx+kZQXVtPIfeIqZ8W1hv+
cjHU2ps0A242A/h2d1B2SR/JaXuA+5oXSrGGO2rqHSMNv/aSix/3MbT/AN+WyhLopwOtZrav
rP0DGcYFzsk/2hVtb+UrfXF/Wkk/WXp+Ty3pz6n/ADcLN3/RIXaIyGkfJSkkkkxTxHRc4U9R
6cxrrqbMgEZmRbd62Jkuj/BP3OHqF+oENgLs77q8el99rttdTS97j2AElZfSemjp2Jk5NjK8
jIynnKsbjV7GuIHtFbHHmB37rPP1uoyjkObiDL6dR/SGNcDlVlmrzZiugkNOmhKkI4jp0U7P
SabPTszsgbcnNIsc08sYNK6/7LefNX1XwM7Hz8SvMxnE1WiRIgjxDgeCO6WfkuxcV9tbDbbo
2qsfnPdo0fCeUw2SpqX/AOUOpNxRrjYRFuR4Ot5rr/s/SPyWk5zWtLnGGgSSeAAq3TsP7Hit
qc7fa4l99n71jtXu+9V+qE5VtXSqyR9o9+SR+bQ0+4f2z7fvR3NdApXTP1h93V7vaLxtxw7T
bjt+ifLf9IpdHByDd1N4g5jv0IPahmlf+dq75pdXJfVT0yj2vzT6Z26baWibXf5vtHxWgxjW
Maxg2taA1rRwANAEidPP8lOb1yxr66sCYGU4m4/u0VjfafmPb81ntrNnT8NrxFnVcxt9jfCs
H1Wj4BrGhLMe7MORc065trem4hH+iDpvePjDvuC0HsbZ13GpaIrwsd9gA7Gwipo/zQU4aBS7
Ys+sdh/7j4jR/wBu2OP/AKLWms3p/v6t1O3919VIPk2sP/K9aSbLceSnkeoVHLzstzdX2W5F
bPjTjBo/6RXT4Nwvwse8GRZWx0/EArC6cPUv6dY7nIszbXeYcS0fhCs/U+82dBpqc7dZiPtx
rD51PcwD7oTpbeSnbSSSUanP651KnpnTrL3OYH7SK6nu2byOWMP70cLnOh4mN1azCFF1GRhd
McL6chlb673Ag7K7HEBhifdB1hb9eb0rM6m+kXTm4wNf2S2W959Rtbxr/Wb2RejVU1Ybq6nM
cRbYbW1OLq2WF0vYyeAD2Twaie6mzk2Y1OPZZkubXQGn1XPIa2DodxXH9Hy8zCtox8HLN1l+
Tst6Tc1xbTUSffRbq7Y1uoMlpWp9cL31Y1RfQbMWp7brbHjdQdh/m7w2XNaZndBAPKj9X+lZ
bLj1Kmz7Bh5Ba5nTantvo9Pb9JroGwuPu9miMdI2eqney77MfHfdVS7JewSKayA539XcQFQ6
Rn9Jzr8m7EsJy3loyaLfbdXtEBjq3QWgLI+s+XXdY99GU1lvTA59mK5zsa/TX1KLTodNIILS
sq7H6RbZ03qz828ZN5dZd1Jm1uW2GhtbDWxsGrkEhpCQhp5qexw6bbeoZOde0sj9Xxmu59Nu
rn/23fgFPq+TZRhOFP8ASLyKMcfy7NAf7I1+SrdAys27Asvz7RbW2x/oZBrNJfS3ix7T4qm7
6z9Isspuzq7MF4c/7BdltLKLCRtDmWfR9w/e1hCjfelNrGxqx1WjFq/mOlY4A/4272gnz2tJ
+aN039L1LqWV29RmOw+VTZP/AE3lZ1P1pxcLObi9Yor6dbltNzcttjH49u2GT6ntM8ASFp9I
GPThOdXkV5O59l1ttRBaS9xeeCUjfVTDofuZmXf6XLuIPi1p2N/6lXM64UYV9x4rre8/JpKq
fV1pb0bGJ5sDrCf67nP/AIovWKL8npmRj0N3WXN9OJjRxDXc/wAmUD831U52FSaL+h0u5Zi2
T/W2Mn8qF9Vv1fP6tg8NGS+9g/ruO8/5yv3tDeudPYOG49/3A1BUsOqyr6x3vraXN9V7Lo7C
2uu1jneUsI+aduD5KehSSSUanluqV9RzKvsPVumV25L5bhdRxi51bLCPa53FtUHuJC3um9Pr
6d06nBoM+izbvdqXP5c93iXO1Kzvqo3q32Nzs913pkgUV5MOsAHf1Ia9zT23tDvFP1T/AJzn
Lsu6ZsbTisHpY1gaRlPdq6X7ga9vAUhs6bD8FOWOrljcvpXU6m49bsgU5PUKQ+zFsfbG+s67
qnuBjwBXQdSFlXTjiYJ9HItYacRwBLWu2nbJaDt0HK53pVdNrm5WfdbjYX29+3Ae1r2fbCSD
N7NXMD/o7wNfktP6wsybLKj01+TR1cCMcMBdSWFwDjkc17RzqQ7wSNWP5BTj4PQxbm5X7Qxb
m9OrZaLWZX6RjdrQ1ltD37nb3e5ziNPmqVDK8lxwsK3H6q7PdWcfOex9ORQxjWta8HbDhW1s
jaQun6Y7qJqurexrb2ZcZF2L7mWQGl5LMgtLJ4O2fJE6G2j7XnPwXOGB6gaysa1erza6klog
ToQCRKdZ10Um6zmV4XT4tyG45situRbWbKw6P8KG6AHzK41uTVjNdTmZlZZgPDsWpxOZhOa9
hkhlbfVAa135xIbK6bqj+rXdUbVisyMWtjCDkn0bMRzeT6tbnB3lod3kubcMRmNdXguD3VMe
H5GMGenaHZDXXzUS1ra2P9ur5I8tUI7KSDpLWUftXFwaXtufU/HrwmuyccioO3F7DtLWv3cN
GhCsdE630rGsvu20DJ6g/wDWMahjqa6q6GH1Xv8AWa0kgTMDyU7qcpleOzpN91wa671bKDdU
XXGwm6RXVbSAHaDd8pTA03dGY3IFOHXVlPFh6ttu9W8uO4gtdW5pDv5ITjtqp6LofVMfqOM4
UY78UY5awU2AAhrmtfWQGkxLHDTssv6zvB6ljsyKnZWHXRZbZRXkNocHBwAtLS9m4AacrR+r
j3Pw7vUrx68gX2NvGKZYXg/SMkmSPFY/1grwH9Ye7Kusqqa2gXsdXW+pzi5/2cuc54cGB59w
iPFMFcRUx6H1XGF9B6necO/DrsrbXlvYS5l72uq22h537Ws5Rsz6z0gvGHSan5LnNty2OYXt
ZXY3GbbscDuJeYa09lRyA0dHsbW7BPTcegtY7KA9fIG0l7m7T+jkyGaJU2vGZaemsxiZpNzW
147ruB6YsfdksO/z28p1C1IuotyMO51HUcrLd1A5AdgZV17K8XY0ghzmtc1vH0gWpKt0b9pF
9jT9kaX0Fjn9QG61tW+zbZscWjx3gOOvKSKn/9kNCmVuZHN0cmVhbQ1lbmRvYmoNMzQgMCBv
YmoNPDwvQml0c1BlckNvbXBvbmVudCA4L0NvbG9yU3BhY2UgNjAyIDAgUi9GaWx0ZXIvRENU
RGVjb2RlL0hlaWdodCAxMjYvTGVuZ3RoIDQ1MjUvU3VidHlwZS9JbWFnZS9UeXBlL1hPYmpl
Y3QvV2lkdGggMTIwPj5zdHJlYW0NCv/Y/+4ADkFkb2JlAGSAAAAAAf/bAIQADAgICAkIDAkJ
DBELCgsRFQ8MDA8VGBMTFRMTGBcSFBQUFBIXFxscHhwbFyQkJyckJDUzMzM1Ozs7Ozs7Ozs7
OwENCwsNDg0QDg4QFA4PDhQUEBEREBQdFBQVFBQdJRoXFxcXGiUgIx4eHiMgKCglJSgoMjIw
MjI7Ozs7Ozs7Ozs7/8AAEQgAfgB4AwEiAAIRAQMRAf/EAT8AAAEFAQEBAQEBAAAAAAAAAAMA
AQIEBQYHCAkKCwEAAQUBAQEBAQEAAAAAAAAAAQACAwQFBgcICQoLEAABBAEDAgQCBQcGCAUD
DDMBAAIRAwQhEjEFQVFhEyJxgTIGFJGhsUIjJBVSwWIzNHKC0UMHJZJT8OHxY3M1FqKygyZE
k1RkRcKjdDYX0lXiZfKzhMPTdePzRieUpIW0lcTU5PSltcXV5fVWZnaGlqa2xtbm9jdHV2d3
h5ent8fX5/cRAAICAQIEBAMEBQYHBwYFNQEAAhEDITESBEFRYXEiEwUygZEUobFCI8FS0fAz
JGLhcoKSQ1MVY3M08SUGFqKygwcmNcLSRJNUoxdkRVU2dGXi8rOEw9N14/NGlKSFtJXE1OT0
pbXF1eX1VmZ2hpamtsbW5vYnN0dXZ3eHl6e3x//aAAwDAQACEQMRAD8A7qtg6B0a21+7KynE
22ua33XZFpjQDiXEAeAWA7EfmYdmbm5JxM85ddGZjtl2G/Kqc0VGxoG7a4bRytDrfWMYdXx6
PXtux6Q42UYDt1v2hrmljbWM95aRI+PKB0XBf1DqeTZ1Jrm30uquyK6X7cd9hG6tt1Wv6Wts
boMHRVBoLPmudKv7H9X8XIz+sZddWRnW7sjJA2s3kba2VjUw1o0lci5j2dSpf0592Y514tZk
U49gZ6p0D8rHeG1u5+mwg94W39Y2ZuY7Jtc6yllT24fTsRzWurybnkb321vBDmdgewBKh0vI
zenU51Fj7Xtqe3Copx3erW7IsGn2d18OZsnVrnEBEbXuSpfMut6j1d1mCzG6nlUUiipxe014
l7XH1rHVPO89oI8IV/oGTk00519+RdkYNZb9nvzYqc+wA+qW7gzawugNlAw8HoGYyjpGVh24
Wfi1/oXWj07yG/SsqyKjDtdTB+SJ9YhUKsDph/yh6djLMjCsez176mAgH9Jta+HwXDugaPpU
08v6u23ZWOx99LKMg25W20F11b3vbda6t7PYS0ANDidArN/R8PqE9QN1tbsywsZXWW5NVb7B
6T7W7AQC+tsbj9FYeM/L6c5wouu6S/1bjmY9zHXYdDXSMetjYIO7Qyw+KJ0rpuN1PJb6PVm9
O6kz3ubgMrqba0HVzdjtr2/ESO4Ro91Oj1rqt3QMwU0Mw7K8w14+xtrqspjGt2Me8+8Brf3o
Cn1R3qVYn27AfVeGljIz2U3chshwewWTzKz6c04nU7ui04fT+pHMY83WUWGt9hP0qrX2Cwby
3WNyP1H6vOtqLwKbxhsobf8AtAOJYypjy5vqNaQ4Q8E7e4SoCvzU9D9XMC3p/SKce9my6XPs
Bd6jpc4ul7/znRyVkfWDDt6gzMLsXp9mM2aXZOULGWVmAN07DuidIK6DpeP9m6di4/qG70qm
N9U/nQBrquYxn4tgzLc/rmRgZlN9wux3XMDWNDiWbarmnTZBEJsdyVOP1PCxsC7IxMKt1ODJ
qzm15TqDa6qj1bC2oNc1u5o0n6RW7S/pnTaM+vffb6FLb3Zr663W0+o1oqpDyJe88iRoqNHU
sc9Orf1nHvys+54ONlvwd4DjPofRADztKfqedhZJs6i2rqDsI2VnqNDKWNa+3Hc1rA42ua5m
sSByn76FTY6u13W6MZ9OO2nMx7HYjqM5wrNVtjWvZaw17pf7QRHOqSv9JYMtvUcMMyunZptb
fdba6t936US0sLd7QA1u0eCSbf6Kmhb07Jpxh004ePm+qbH4b2XNqyqbZ3uBf+ca3O+k0z4h
a3UM7J6N0ullFTMrq2RA2D2C2xrd11jiP5LTr8FLp31bxMHKZk0XPdjVl9mNjEgsY+4fpHh/
0nbvMqPUeo242Q3qVNteb0yv9Fm0s2ufRJg3Nc3sPz2ntqhdmt1N7H6ng5IxAHgW5lXr47Dy
WgAug+I3LA6rihtw6BRdRgYrmetSchrnG+5zy9xbbvaWuaddDuUumjpGFXkdW+0XHp2A+ynB
NhD627yBYaGsG5w3HaOfJZuLlOd0+yp/T2Z9eR6nrZrD9s9TJ/wLjT9KsHj3RCIFHRTrdDxr
7Ljb1XLstv6O9wNbnMdW1zmfznqta1zhsd+dqO6xeo9W6Z1TMecvqLm9NvIFbLa6v0Dh7dzX
OadzHc7mukd1u59GJidCxumPfj9K+3FjMgfQZrBva13G5w0ElZXVvq1Rk5T3txxS/PyasfDZ
TBq+z1t3W3WsEsduE8+SIq7Km036tvrNGJmZFvV+nUV3ZVbbngudYQG11Vhp3ENbJB81nYHQ
MfBzan5OPfmWVYJtzaAPUsa/Id6bWVHR42t3SN3Cv5GJm19SzKseg1Pc4AdTYWu+z4LGNBqo
YCXizQiNveVtfVpmS3pxN5tc11j/ALMcmfX9Cf0fqk6z8dUjIgb2pymZGD1SkdJ6P0yyqjGu
rNtpaMUY72kODmtcN7nj4a+KFkZ2d+0MzHF99ObdkOY95aTTjYFY3+swOHp7njvrqfJdE/p+
Lb1FnUqnlmTSDVcayIsbH0LR32nUdwuVfT1XIzLKa8u3odtj3emLsiy4Pk6GoOHpEH92UIkH
+1T0PQ8zMt6H9qu33vb6poe9u2y2tpd6TnNAEFwHguat6nZk4teR6+HlZNOOc7My8ilj2Uk/
zWHXwQ4unk7tF2DKrcbpQpy80m1le2zOcGsO4iPUj6IXO4eJ1K7qWTg43UcfJxscU3vdbjUv
32PLjJNW3UBo1SjWpU1updVbmZIdl9UqwrcJ9V2Lgtrse1twaH/rTmt1+lG1vCtY+VgWdDfi
b3dXyerWXvezDbs95P6Qt9UjY2vTVyvmvrXSsrNfiYtWbi5dpyQ51wpdW4ta14fua4FvtkEK
lZh5HRMWjqb8rGqzi+43ssDjTZ9od6np17AXy3aIICVjT8FNr6sD08nLrzHZLuqubW64ZYrD
jU0FtZr9H2FvMnx5STfV/Jbn9SuzsvJrfneiKq8WpljG107txI9YNc8l3JSQ/SU2OpHGwelV
9GY62baHUssZG6utjdrrnucWgNb3XNYWJ9symZOA3H+0tFeMR0/cKDXM2Py2vDPa+uQ0Qfiu
t650OjrGN6T7H49rQ4V31RuaHCHNIOjmnuCh4mCenPu6p1PKZZa2ltT7gwUsFVZLpcJOuv8A
clGQA8VLdS6NYcLDo6U2qkdPtZbTj2AipwYCA07dREyD4rI6Z0DqA6y3Jy8YUZFd9mTldQpe
GjIDhFdLGtO7YBzvHbzVuzqnXxjW5XTm09WotY63FDQab2Azs3Vv0e2R5FaeR1Q4/TKcq2h5
yMgVsZi6NebbBpX7tG6+KVyAre1I+qM6vvcaaMfqGC5oFmHb7LPMte7cw/Bw+azei4V9XSM3
IxMW7pua8XV14LnEVNc0u9N9bCXNbuEat0UMnpuayivH6b1R2DfkkbcHJf67W2Mi19ddoO9p
A5EnRbef1M4Dan24197Hz6j8dnqCuBy5o90fAJbCgp5R/wDzbPTamdOYafrCwNFLWtc3LGTp
u9XuQT9LdpCv9fzMR+Q5+Vh2W19NDGZebTe6qyp10ECtjCHP7LW6V17pfVsvJqxCHW4oZucR
Di14kaOAcIIgyueycroGV1C9/XGV/a3WuxmUua5jaa2bvTsyLAQCHaFrjxOiI1OoOn7VN/pA
w8LB6r1DEdmWvG52Th5utjba65GkT7mR34WHnfVTBb0X9tvyWZFWxt9mGz9HjPmDsq9Nwc13
ZpnldDg3vxfqr9twMctvtHqPDy+8kl211pLvfYA33DyWdTk4rH4VFeZhdWoN7fTw2UCt7HuO
tlbWEgbJ3HcEQTZI7qejzsWm3pDsU2jEpNbW+pYGvDWiPpC2Wn5rB6d9Vcb7ZVlY2ThZTKXt
c91VDGWafy8ewCfiFqfWWuu6rEplrsh2Q12Pj2MdbXY5oMixrfzQDO7sqXT8O39vUusowun3
0VvfZXiPJfdW72CW7GDaHa99U0bHVToZfQr8q25x6nl11XyHUNNZrDXCC0B1Z0VPPwG9NxOm
Y9GTe/Mot9DCte1tzzvaQ4PDtg2tYOeRCh1O3LPUbOlW9YZR9rrLqqX4wIDHksDfWD2+7TSV
PrOO/E+r+Nj5tv2vIrtqqbnPcaNji7aL3PrMt2j70hemqkHSs2yzr/p9Sdfdk1Ouxca01110
AtDbLIDHudLmgEbkkPp+b0erqWLgdMaMk15Fgtc/e+4vcz35TLZIe381xKSPXbop61ZH1ltx
x080ZYtZi3kCzLrAcKC0hzLLB+7uAnSPFa65rD6h1CnqVo6udmN1Vtpw8a6GtrNJ2itxOn6V
nuKZEa32UiPSMy3rGJlX5td3UnFj3XUfotmHVuJa1m528WvdBnRS+stuRbmNbksI6JimpuZu
Bbvdc72212CHN9HQyD3Vn6o4FFeIepVl8ZgAppsId6FLCYorcOWB0kFbltVV1TqbmCyuwFr2
OEgg8ggpxlUu9Ked6N0np7erZTKTcK8C4XMpc8WVG26vW8P1fuIJkOPmnymdSwuq39fdvsxQ
9uO/GrJeDihutwY2fc2wz4wtrFw+ndKxTXjV14mO07nRDWye5JWT1DBv6a92d0Bw+0ZAe5/T
i8CvIMTvr3aNeOZGh7pA2fw1U2ej35ediZeTpvfZYzCyXV+m59Ufo3OaRMBxI81gfZsiuna7
H6ozq+0B7iTkY11g/f3F1ewnxAgLrOmY9uL07Hx7nuturraLHuMkvj3En4q0hxUSpyOvHKb0
mvY/0nb6hfXXYKXPbw6qqwxDieFl9JqjqlLul42Zj1hzm5wyyH17YPDnPe7fujg/FX/rGHvy
OnNxSyzOZabKMe1jn1OAbtc6zb9ANnR3Yqn0bpFeP1ttxtp+3ht1+eync0O+0uBr2g/SY2Dq
iPlU2uvAZHUcTHptfi5FFdmQ/MY5rfSojY/2va4P3H7uUH6v4eBT1IsoyMjJbTjtswXXOa9n
oZB3Ocx7fcZc3875IP1nZjZfU68bPuowaaWCzGvvq9T1HuJ3sDy5rQBAlvdWvqkzFa3NbRXQ
4stDXZeK0tqtlu72hxdG2YIaYS/QU5PUcbGyb8rqVh6jfjZFrenNprfWA+HuksD/AMwP9oBW
9gPxX/Vxhx6r87HFbmNpvh9z9pLCx/qEAkEd1nXU4WD1V2f1Hpl1FTbTYzKrtN2MH8evZS0+
x0d9q1fqzdTf0TGvoY2uqze5rWEubBsdqCZ55SkdB9FOF9VnfWXFowqfsDzhRsv+0vra+oSZ
dVs1Lf5Lkl2KSHHrdBSkDMwcPOp9DMpZkVSHbLGhwkcHVHSTFMWMYxgYwBrGgBrQIAA4ACkk
kkphdTTfU6m9jbaniHseA5pHgQVlN+qnSasvHy8YW4r8az1GV1WOFRJBaQazLYIPZbCSIJGx
UpJJJBTy/wBccnGptwzVkijqT3ilrRc2kuosk2Bznhwj26HxVn6rYvSfTOXgZNuT6bPsza7n
te7HaDuNPt157kla+TgYOW5jsrHrvdUZrNjQ6CRGk/FLE6fg4W/7Hj14/qkGz0mhm4jidqfx
DhrVSZ9bLG7LGh7Ty1wBH4pMYytoYxoY0cNaIA+QUkkxSxAIg6g8hNXXXUwV1NDGN+i1oAA+
ACkkkpSSSSSlEEJIiaArEuX/AHT9qLYJKRb4JtpUUsUx0+xNrJJJJilJJJJKUkkkkpSSSSSl
JJJJKUkkkkpIkkktBapJJJJSyW0J0kDGJ3AKmOxNtKmkozggdtE2jSRE0BRnlz0P2qtgkpbQ
m2lMOGY6X5JsLJJ9pTJhiRuCFKSSSQUkSSSWgtUkkkkpSSSSSlJJJJKUkkkkpSSSSSlJJJJK
WgJJ0k30X0tT/9kNCmVuZHN0cmVhbQ1lbmRvYmoNMzUgMCBvYmoNPDwvQml0c1BlckNvbXBv
bmVudCA4L0NvbG9yU3BhY2UgNjAyIDAgUi9GaWx0ZXIvRENURGVjb2RlL0hlaWdodCAxMjYv
TGVuZ3RoIDMyOTYvU3VidHlwZS9JbWFnZS9UeXBlL1hPYmplY3QvV2lkdGggMTIwPj5zdHJl
YW0NCv/Y/+4ADkFkb2JlAGSAAAAAAf/bAIQADAgICAkIDAkJDBELCgsRFQ8MDA8VGBMTFRMT
GBcSFBQUFBIXFxscHhwbFyQkJyckJDUzMzM1Ozs7Ozs7Ozs7OwENCwsNDg0QDg4QFA4PDhQU
EBEREBQdFBQVFBQdJRoXFxcXGiUgIx4eHiMgKCglJSgoMjIwMjI7Ozs7Ozs7Ozs7/8AAEQgA
fgB4AwEiAAIRAQMRAf/EAT8AAAEFAQEBAQEBAAAAAAAAAAMAAQIEBQYHCAkKCwEAAQUBAQEB
AQEAAAAAAAAAAQACAwQFBgcICQoLEAABBAEDAgQCBQcGCAUDDDMBAAIRAwQhEjEFQVFhEyJx
gTIGFJGhsUIjJBVSwWIzNHKC0UMHJZJT8OHxY3M1FqKygyZEk1RkRcKjdDYX0lXiZfKzhMPT
dePzRieUpIW0lcTU5PSltcXV5fVWZnaGlqa2xtbm9jdHV2d3h5ent8fX5/cRAAICAQIEBAME
BQYHBwYFNQEAAhEDITESBEFRYXEiEwUygZEUobFCI8FS0fAzJGLhcoKSQ1MVY3M08SUGFqKy
gwcmNcLSRJNUoxdkRVU2dGXi8rOEw9N14/NGlKSFtJXE1OT0pbXF1eX1VmZ2hpamtsbW5vYn
N0dXZ3eHl6e3x//aAAwDAQACEQMRAD8A9VSSSSUpJJJJSkkkklKSSSSUpJJJJSkkkklKSSSS
UpJJJJTznSuofW6zOqZ1LArrxLZ3PYdWaSJ9xQurfWnqA6x+xei4zcjKaP0j7DDQY3eXHiVT
q+sn1j6V1nHwOusqfVlEBr6wBG47ZBHgeypfWTdifWtmR0Gx1vVbP5/Ha3c0adz5jkKrLIRD
SUtJAS4vn+jv4uTjLmf1mHBU8E54TiMjy5lH9KZvQDq7HR/rT1J3Wf2J1nGbRkkex9Z0Jjdr
qeR3UeqfWvqburv6R0LFbkX0/wA7Y/gEcxqBp5rL+q19d/1nuu64Xs6yZbTW9u1g0ggeccIn
1CJf17qz3/TJOvfWwoRyTkIx4j6pyF/pCI6HxX5uU5fFPPmOGJ9jl8U+DX2ZZchrijrrEOt9
XPrVfn51vSup0DGz6pgN4dt5GvBXSrhLhs/xls2fnAF3zq1XdqbDKREhI3wSMb8nN+J4cUJ4
Z4o+3HmMMMxgNoyluB4KSSSUrnqSSSSUpJJJJSklxv1t/wAYB+r3V6MCrF+01NayzPtkj0mW
O2t47/Fdgx7LGNsYdzHgOa4cEHUFJTJJJJJTxFfTeu/WLruL1DqeJ9hxMOC1juXQd0CddSo5
HTuvdE+suT1bCw/2hRlFxhvIDyHEeIIXcpKH2B+8eK+Li626Q+LZAa9rH7Pt+z7OvDwE3vd3
fW3icLpfW+s/WWnrXUMX7BTjbdrD9J22do8e/KHb07r31d6/k5/S8T7biZcksbrG47oMaggr
ukkvYFfMeK+Li62r/S2Tio4sZw+2MHs68HADY1u7vq8h9W+i9Wv63d9YOsV/Z7Hgiqg8iRt4
7ABdekknwgIChrrZJ6lq81zU+ZyCcgIiMRCEI/LGMdgFJJJJ7XUkkkkpSjZYyut1jztYwFzi
ewGpUlzv19u6iz6tZOP0ymy/LzIxmCsElosMOcY4G1JTzPQ8LF+s3TPrH1TMtrbZ1x76cQPc
AW1UaU8n94D7lv8A+Lfq7upfViiu4zldPJxLxMma9Gn/ADYUMD/Fn9UqcLHqycBtuQytotsL
7Jc+PcdHgcql9XOj5H1a+u2d0/DxrG9E6jS26l4BNddjPzS4z5pKcn6sdG6t9aT1Juf1XJp6
dh517KaqbCLHWbplzzPtaIgJLof8XWFmYeL1ZuVS+g2dRvsrFgLdzDEOE9kklPSnPoHElQPU
WdmH71npKf24sXGW+epDsz8VE9Sd2YPvVJQsyMekgXWsqJ4D3Bs/DcUuCPZXFLu6H7Sf+4Pv
S/aTv3B96oseyxofW4PaeHNIIPzCdLgj2VxS7t79peLPxTjqTe7PxVBJLgj2Vxy7ugOo192E
KQ6hR4FZqSXtxVxl1Bm45/Oj5KYyaD+ePmshJD2x4p4y7QsrPDgfmpLEkpxY8cOKHteKfc8H
aSWS3Lvb+efmkh7R7hXGEKSSSlY1LF+sH2T1aPXHTi4tds/aAJdz/g47eK2lg/Wm3OY1hx3u
pY2qyw3Mpbc4vaWxX7mu2jbJ80Dskbtn6rADotLRtgPsEViK/pn+a/keBVLqHXcvDyXtZnYN
oFra24eywX+5wbtBBgu1Wr0S3Ku6dW/Kkv3ODHuZ6bn1g/o3uZ+aXDssDPzTbbeMm/J+wsvD
D6WECC5rhDGXgk86bkDsE9S9amUKLhfU24MfWH67LWljx/WaeFNOWqSSSSUpJJJJSkkkklKS
SSSUpJJQvuZRS+54c5rBJDGlzj8Gt1KSmayuu4leQaS/Ebllm6N2ScbbPw+kj4fWMfLyjitp
yKbdnqD16nVBzZj27uUHrH7LF2M7qdVVtID9u+t1jw7T6G0EDzlA7JG631XDm9K2OGw133N9
MPNnpw/6HqH6ceKyM3Hy8W97r9v7KsyWOfi15QIJfYIcazXu+lBLQ5a3ROrdJutf03Dsr9Wi
Xiiqt1TWVk+2dw58VmZd/Q+nOOXlYfoZbLy/7a7CdtIDpO0k6uj875oHYJ6vTZNxoqfb6b7i
zX06huef6oVXC6tTmZD8YU30XVtD3MvrNftJgEE6FDyM2jN6OMzHFtlOQA6sMf8AZrSCez3l
u1VehYtzM7JybG3trfUyuo5V7b7AQSXBhY5wDePmjeqOjtpJJIoUkkkkpSSSSSlJJJJKc/I+
sHRsa40W5TRa1wY5gDnEOJiDA0VzJBONaB6k7D/M/wA5x+ZP53gsDr5yLXZOHVl5JNjRtw8f
F3Nd32Ouj87xnRa3UOnU9Q6f6OWzY4Vy2SYrfsidCJ2oWdU9nM6Vj3nrDMrZlittL2Pdn2se
4F0EekxjjE/nKX1uzK8XHxzbk347XuILaRLbIH0bDuY4D4FZnQ39NZn4rqKKcZ+JU9t11DrL
XXgNj9waabtdVudTGIc7p+XlOpbisZcD6+0Amxg2Q1/dDonq0Pqr1nFy734dGAzF2t3+tWRD
4MatJL/vKwruuYeJ1K/IppOXb6j4bmuruEgmRU/dLB5Qt7odOHVmdOroyMa27Exrq72UObuO
94c0wNSIVGyx+Dl04hzcGs9OsuNBsD3bvtE+28tEMLQ7xQ1oK6l0Or57Mz6v4mS8ehTmOZ6m
1gySwEH6LQHNOo5hQ+rGPg5Tn5n2Kup9Xpmu1tRpIscz9KzX6W13dWsiejdLwK2WUvfjcOtt
NDXnaZLdodumeE3ResZ2bm2stwLq6bPf9rc8upBAA2Vh7GO18keotXR20kkk5apJJOkpZJYV
3X8iq8elZg5mO+5tIbXaWXs3u2CWGd0HmFvHQwlaaWSSSSQ8x9ZKvtPVKsQZjsIuYLd7rX7X
7Z/RNorI+lHuJ+S2OjY+JX02t+K1rW5DRY41vdY0uIiWufqs/rmKzI6i0MzThOFdXrFtQtJP
q/q/J0O7iAtHoIqHTam0l7mNfY3fZAc5we7c6G6CT2QG5SdnGv611St1WJjYX2u/Gd7K2ZXq
PdAIBuNbNn+cVZ+sWY+np+I7IvqwLr3Q+t7PWLnbZdXW8NftP8qFgC/q9uRez6vUegBY8GzD
91Rfu1Lw6w1T4yt/q9uz6rz1mkW5hqILXGoOF0H3N98T/UJKGuqeyH6s5HRnZrm42DdTnFhL
8yxrnh7RyBc4N+6AjY9uX0/Df0p/TLMm5xsDXs2Gm4PcXB9jnOBHPukKH1Wqz3tGSbbKsL0w
1uFZ6rxvj6fq5DG/c3RVG/8AN77Lb+1t37Zl/qzv+0+rJ2ejHbjbt0SGyiz6tRn4+F0vpGPi
19QymVOe/cNWeltbureXsLYLoBlWPq1Z9ZvtVtPVmPbitZNXqNlwfI0Fm4yPj96e39q1u6ff
T6d3WGYkXYl0t3sLmeq4WDRrmuiVtYl+RdXuyMZ2LYNCxzmPB82uYTp8QEhuo7Jk6ZIzBgwY
0PmnLXBs6/k15DW124OZRZe2kNqtc25oe7aJYZ3Ed4Wp1PPHT8Z2Q6qy2tk+o6oNJYAPpkOc
2Qsg45HVcE5mZhvtbaXVCqljMlztrvaSx74bHKvdbvfVRcMjGdf011DvWdS5ota+RGj3N0ji
NZQ11To5fT3t6h1XFF11Zvo/WWNfhOxslzYLdXH27fdrC6DOyLKKN1PpG5xArZc/02uPcbvF
ZXSRmftNp6kcj1vRcMMZBZOyRvJFLQN3E7jKs9ekYzXvOGcdpPqV5w9jj22unQ/JIbKO6Xp3
Urcyy+i/FfiX4231Guc17TvEgscw6/ckqH1QGD9gvdhmqX3vdZXTvIZP0WbrQHOAHB48Ekta
Vpb/AP/ZDQplbmRzdHJlYW0NZW5kb2JqDTM2IDAgb2JqDTw8L0JpdHNQZXJDb21wb25lbnQg
OC9Db2xvclNwYWNlIDYwMiAwIFIvRmlsdGVyL0RDVERlY29kZS9IZWlnaHQgMTI2L0xlbmd0
aCA1ODE2L1N1YnR5cGUvSW1hZ2UvVHlwZS9YT2JqZWN0L1dpZHRoIDEyMD4+c3RyZWFtDQr/
2P/uAA5BZG9iZQBkgAAAAAH/2wCEAAwICAgJCAwJCQwRCwoLERUPDAwPFRgTExUTExgXEhQU
FBQSFxcbHB4cGxckJCcnJCQ1MzMzNTs7Ozs7Ozs7OzsBDQsLDQ4NEA4OEBQODw4UFBARERAU
HRQUFRQUHSUaFxcXFxolICMeHh4jICgoJSUoKDIyMDIyOzs7Ozs7Ozs7O//AABEIAH4AeAMB
IgACEQEDEQH/xAE/AAABBQEBAQEBAQAAAAAAAAADAAECBAUGBwgJCgsBAAEFAQEBAQEBAAAA
AAAAAAEAAgMEBQYHCAkKCxAAAQQBAwIEAgUHBggFAwwzAQACEQMEIRIxBUFRYRMicYEyBhSR
obFCIyQVUsFiMzRygtFDByWSU/Dh8WNzNRaisoMmRJNUZEXCo3Q2F9JV4mXys4TD03Xj80Yn
lKSFtJXE1OT0pbXF1eX1VmZ2hpamtsbW5vY3R1dnd4eXp7fH1+f3EQACAgECBAQDBAUGBwcG
BTUBAAIRAyExEgRBUWFxIhMFMoGRFKGxQiPBUtHwMyRi4XKCkkNTFWNzNPElBhaisoMHJjXC
0kSTVKMXZEVVNnRl4vKzhMPTdePzRpSkhbSVxNTk9KW1xdXl9VZmdoaWprbG1ub2JzdHV2d3
h5ent8f/2gAMAwEAAhEDEQA/AOh+sWW7CbRkMudRY4mprq6G2vM6xvfDa2+JOij0CnrBsflZ
vUGZOO9sVYtexwYSZ3OsrAE/BWeu42bk4OzDyxhFrt11rjDfTAO6dFzP1QxGjqwzMnIjJeLG
0tcxzW5Fcx6lL3EBw7xtlTndiGzsdZyMDDy8bMxn4ZycN1gtxrLWVOc2xu066wQddUAYnR/+
b2C/qOX7caxz6rcR+pteXfo6vaS4iYEBWh0F77H2GioWN6l9ra9waS6qPdrB8ToVPDswOm4t
xyXscKs2/wBEMaXOa+x27YxoE7oPZKlOZ9X8q12fhVOy8mzKa3J/aGLe/cag3+a9Rse08LSf
0v6t5VL8/wBQHCtdvt2XObjPdMEvYHbeeVbxuq4GXa6isPpyLGEgXVOqc8AakbwN0LKs6Mel
dNa3GzKaa7mNx8021myh7newXBoPtfrE8eKXTur8Ef1nyc91z8XGDx07Cprysk4/ptsBDjs2
Ot0gBvYK99Xm4jcnLAxsijOit2VZlPFj7GuBdWdzXEIuR9WsXIbWx99zWChmNkNY4NF9df0R
ZpPPgjUYNPSsbKvD7MixzTZY+5wL3CtkMZMAAACAjRu0XpTh4XVer/bmUk5bn32sLmXUkVj9
I9tjWvgbWenDgtj6x/a29KvsxrGsDGkWsczcHsd7SCQQWgdyFiYfSK+piiyuzGorf+l3YOVd
6jTB2+wuIME6rf6g+7F6fXq6+yssD3CxlLn7fpEus9vu7hAbFJ3cHpvSMF3VqaduKRRT9oZf
02yxnukMAsZucPh4rc61b03ZTj9SNAx73Hd65LSNokOrP7wPmFQ6P13pd3U3YeLS/Hfe2RU2
pnphzJLnG6kubr5lD+s/UK68qrH+2Pq2tm3Fa0bbA7j9Lss2OHwhLQBWtur0gObXbWMj7TQx
8Yz3OY92yO76+df3tVg/WbHqtzjde5l4D6m0BmQ2q2raHbw0Oc2Nz9uvKt/Vmv6tivJ6l0rc
21o2ZbrnHcyPdDh9GPMKeLhYb8ynqPT/AEHvy3znVVBt9UxrZu+kx3n38EtwFdXZw2ZFeHQz
Kf6mQ2touf4vA9xSTZmbj4NQuyNwqnaXMY58T3dsBgeaSd4IR9VqwrcJwzq33Y7XNe6pjXPL
i06AsZq4T2VL9p3ZOfi119LvdiA63W1emaXjRj27j9GNDC1rXWNqc6lgssAJYydocfDdrCw7
M7rVudjsF2BiOY/9LjHI9V1jToWloa33DsgVBv5fSG5V7rnZmXUHQPSpt2MEeADZ/FZ1/Sx0
vp2bc7IdW+m9+ZhXusmwONYG1zrBruM6eCNlP6xR1nJvx3GzFrqqcMSwhrLB7vV9N5+i9sDy
8Vn5NttvTrxlM9PAy8lrKbOogW+gx7T6j3BrtG7tGydEDXZIT9Iy6snIa7qOc7I6ljUvsrxX
msMAc33WV+j9ORp5eCp4jehZHS33XdIx6cxlIyHYj37WWVOG7fU92h0/FS6HmVvz66a8bDeA
LK/0FLmWGtjfbkB7tNlnEK5n2XZOPRW36v2WOx3t9Oq5tJYKwYc1hFnt04S6Ka2e/AbdblZd
AzMU10mpv2gVOx2OZ7anVuc0a86GVpdMryz0S40e71d7sGsWttLKzGxnqu3NPfmVSux2ZPVg
3p+bjV5Fd5yDh5lRLvUcz03bdW7hHHMdlaxGZdXQrf2O5tmY66w7torZ6nqEW+m10gAR7Uhu
VFj0rM6NlZjHUMZhZlQfXbj2VNrtc8e122waOgj81G+sWMMuunH24tjwTY1uRaaXgjQOqIn5
yFidMqxhk01dRxMy5zMw1NtturfSzKcfULgyot7nwK2frBdj1A3Z3SP2hh1NBdkD03ObuMFo
Y8h3Pgl0V1YdEy+r157+l9RxqmNbT69V9Tmklu7ZDxW1o+cJfWPCw8utj24zMy3HvqdltqAd
eKRO4e07vl4KX1f6fjUZuZmY2JZg12trqbj2tLSNsuc4S5wIJPZZ37J6g3FNGThOdj0epbk+
i8epm3vJ9MktIIY2dx3FLorqmx9nS+h5dodZ0tuZkOOGHsNr6mGAzdU6TrtkjtKz+l4vQ+q5
zK8nMsb1NhDw2lzKhZt13MdXW1xHi12q2D0nJvrwG9Rqbl14WI8uY8h4fkuAa0a8wO6rdF6N
T03qND3tdWcbC9XLe8lzBba780ukN2tBmEq27K7t/rOU+u9obZmY3pNn7RisbdX7vzbqvc7t
4JLAxX5mZ1W04DWG60uc7LqtdW/03Wse19jLWtc9rWtIG2RqklfVVPS9Lxsj9hsxbi6m41vZ
My5m6ds+YBWGcX1OkuFePgMw2AsszqWPsuIYYfbWzaHF3eZW90c4bsV9eLj249IOrbgQXFw1
I3ElU2fVlh2ssz8l9WO11eLXW5tZqY/6TC5ol0jTXsmwHojWtCvsZuaJ+8ZSQYmU5Soivm12
s19qDrTvSvbl0uxslt+E6oDJe5uyuJfc3aHSCD7lQxKaasWxvTXWPqH2QZ+PVWab3MYHB9jG
WgSHkjjlXvrEzCpfjYZdbi12Y76XX1sbaxlDC3SxjtYBg7hwh3izHfdRl325mVY3GfRmvLA2
yht9YIa2r6MOd8047sPRv4d/V8nqOPY7Esw8ZjnzuLQx2OR+jD6xLhaHfcrXQy5/S6C9xc5x
s1Op/nXwr7uSfiqHQh/knG8w4/e9xR6oc3Ivy+sU2EY+FZj1Pe1rL7XNvaayW7tzR+jOkhWe
mZWF07oWI8eu6h8wdrrrNznOc4vNY11/ORK8HpXU7L8jIwaX2VXPp9RzQS4Vx7il1bIsw7MJ
w9arAY4/aDjM3uloHpsc1oJ2HWYCXirwauJm9Fzupsw8ZtjH1vOex5a9rX2kFjw4PbyAZhZf
WMzqmZbYyr7T9isyvs9LWMpta6yk7toaSx8Sw91r9Fy+tvyq2Z7nPpvqsvYLagyysCzbU1xb
pqzWOVep6Pi0DG2b4w7LLq5My+3duLtNfpGEKsJ2RdJyb+p9K9W+wiy02MNlbDS5u0lhhri6
HAhZ+T0nJZm0N6hfk9U6baRW1hdt9Kwn2m1tQb6jD4nhHy239G6Zi49N5rpFhblZpr9Qsa7c
/dsH7zjE9lDB6nfZlfY6+o09RZbVY5uQxmx9Lmj2m3b7SCT5FHwKFn5fT8vMeen9cOHkA+mc
d5aaZZ7fbXaB4fmlRxTe7p+WerPZY/qWQ7Hgu9BpqaPS3Vh5MaDdHdCzMHApx8eu23FyW4WH
ZVTRY5hdZk2QN21x+5VuqZGPiY+J0YZdbThUMGZiWVte5wcAQ6t9o2SNdJ1Q80u9XiB3UqrH
2ueOn0iuoFkSbBBebOHaDgcJKj9WumYtROdg9Ssy8WxpaMbRtTHTqdkna4eCSPS6R1bfRjnk
3facmm9hdLGVPNhrJP0dx7eCLhe3qXUq/F9Vv+eyP++LI6EMCrNoNdrRa5ljS2pjms3PO8Vl
7o+gBoDqter29cyR/pcap/8AmOcz+KiwSuA8D+9xNz4lj4OYNChIX/N+3tpt9N1+pejQK899
fqWUkUtk6bL3NY+R30VPqHSem4GFbZh0NpfbbQHETx6zDtEnQeQVvrv/ACRku/caH/5rg5Lr
v/Jrz4WUn/wVilPVpt6zQPPkfyKn0Mf5Kw/NgP3kq3cf0dh/ku/IVU6MdvR8M+FDXfhKPVDD
omuC6z/SX3O/8Ec3+CzfrMbfXH2axrskYtoFJsNT62k+69rvojQbTPyWn0MR0nGP7zXP/wA9
znfxQOodMvycq52FmtxbMmkVZVbqxZNUuAe2SNp1I8EOierQ6RWxmDnZeO9vTcK6gNa31xe2
u0A7r9wJ28j4qnVRW9tdOBhHH6rsY+vKryhtIdr6r2vfvc1wkwWLTyuk4WBhZpe91VOSaA19
VZeazS0Na97Wj3aiXKv9hZl24mdlZlGZk5eTSKLqK9rdlAdYWMIJcCY90lCkpfrZkW+nRhNu
xRVc9jsmu6002FjXbiQ4cNMQidNxcjqPTcjA6pjNGNZAqyKrWvNtfLSX1R7mkc91VzszIq6h
k5nTcR2ZVY708o20GyvfV7D6b2nfA7jaQqYfjYz2Pycg/Y8zddXjdMsNXo2OIE+nLXuED7+y
V6q6Ox0/pn2HJbjXYNN9cE0dQrrYHjbw25saO8HN5VHqmP1bqOe3Jp6ZdjmipzKri+mXvLh/
Osc47q4HBVnGzrG0XUP+1ZmLe5lOEbm+je9z2uNjdzth2sAneVXx9mXmY9HTuqZLRVYL6a8u
suZa2v2vFVzg1zmwfNLRTaorrqxqemHDdh5uYPXy29PcGNqIO02l+miSzOp5bc7qlfqe95tt
whgY1jqcvZBM2O3BpY6Jg/JJK1U2MecTIpzMvHc71LQd772l7rLPaLPRZpIBW1b7Ou0H/S41
jP8AMe1/8ULp+D0tmZk+jiMquxbA1r/pGHNDg4Twi5vt6n02zxddX/nsn/vqZhxmAIJGp/lr
QbfPczjzziYAjhBFmxp0AjxSqvNn1hm/pOY3xpf+RB6s/f0YP/eNDvvewq3mN34eQ3xqeP8A
olZ2U7f9WqH+NeMT/nVypD+xpupkGKLj4Mf/ANSVTwXel0DHefzMNp+6tWs0xiZB8K3/APUl
UbSa/qw4jluFA+PpwEVNnpTPT6Xhs7torB/zQh43v6xnP/0ddFX3h1n8VboZsoqYPzWNH3AK
p0z3X9Qt/eyiwfCtrWpdlLdQ6hZi5eFjsfVS3Jc7fdeYaG1gEsbx73TpKyOjnGzetVZYxvsr
y266o0WB1FoDjR6rmQNrz4jla3Ua68nMwsK5jbabPVture0Oa5tbYEg/ynhWL24+JVZltrY1
9FLmtcABDGAuDB5ShWqmjX0+m82ZvT83JwW2WPNray30y5pLXv2WNcBMchc56fT27sV5rr6f
fa3LrvzqiL7tpG4VW6ghxHJiAeF1WJ6eD0Wn1mve1lTTa1jS9x36u9rdT9LVYTaOgX5OLiYX
U7m3WttopY8h+ypwmyjZaAWbhweUCNkhuW4uXjdIqpzMb7VhtLrLRj2OdfjguLq/Rdy8VtMa
aqtRjs2W1dNzbs2zDpH7Nfc5gY12QCdlbg0Ev2Dl3CfOP1hxc4XUYdjsfp1Ta8QYz9zbG9xb
W+CfaNunBV/pmPh255vxMc41NY9e2twLT9qvaJ3NPBYzt5pKc6yyqytnTHdJtabH0mpuU1z7
LW7j6xdc0nYWciXJLq5KSNItoU+zreUz/T0VW/5hdWl1X2vwLf8AR5bP+m11f/fksj2dZw39
rarqj8Rte3+KbremB6n+iups/wA2xpS7qb1jd1b2/vNI+8QsVzt31VpP8iofdYG/wW6Pp/Nc
+NPqvs/0b9n3XpH9ig63UjHT8o+FL/8AqSqfUPb9Xdv71VLP84sZ/FWusGOlZp8KLP8AqSq/
Ux/k3Gq/0luMz/pNd/BI9fJTpgQQPDT7ln9E1wPVPN111n32OA/AK7fYK67bDwxrnH5AlVuj
sLOk4bT9L0WF3xIk/lR6oYM/SdcsPbHxmt/tWOLj+ACXWpdgHHHOVZXQPg943fgl039Jk9Qy
P38gVA+VTGt/KSlmfpep4FHZhsyHf2G7G/i9DolfqznehVjVEsflXMpaW6ENne+P7DSidRON
VRZm3VMssx2l9bnNBcHD6MHnlCf+m61WzluHS6w/17jtb/0WlLqH6fKxMHlrn/aLh/Ip1b97
4RUlZa/C6aLsx5e+irfc48l0SR9+ibplFlOI03fz9xN15/l2e4j5cIef+s5eNgctJ+0ZH9Ss
+1v9p8K+kpYkNBc4w1oknyCSo9WLrKa8Fhh+c/0iR2rHutP+aISSUrqnsswL/wDRZTGn4Wh1
X5XKXW2F/SMxo59IkfEa/wAFDrZ3dJtuZr6ey9n9hzXhWsxotw72jUWVPA+bTCXdSSt4exlg
4eA77xKw36dBzWf6PKtb91wWr0x/qdOxH+NLJ+IaAsrI06b1Zn7uWT/nOrd/FAqDodcP+Rs7
zoePvao9R1PTa/HJqMeTGuKl1z/kfL86yPvgKObr1DpbP5djz/ZqMfikpJ1h5Z0nLI0Jqc0H
zcNo/KrNLRXVW3gMY0f5oVLrfuwRV/p7qa/ve0/wR+q3Gnp+Xa3Qtqft/rEQ38SipD0MT02u
085Dn3/9uPc4fglR+l6zlWdqKqqG/FxNrv4K1h0inFopGgrrY37gFm4+Sael5/UfzrrbrGfI
+jX/ANSEOymx0r9M7LzP+5N7gw/8HV+ib+IJSwYvzczNP0Q4Y1J/kVfTPzeT9yTj+yujANHv
x6Q1o8bCIH/TKFfS/E6VR02o/p8jbjhw5l3uuf8AISkpL0v9Ob+ou/7VOiqe1NctZ9+rleTV
1sqrbVWIYwBrR4ACAhZ2UMTEtyIlzG+xvi8+1jfm4ooa1Dhf1HJy3H9FiN+zVk8SPfc78g+S
SDbjOqwsXo7TNuV/SXjnYPfe7+0Tt+aSCUmHuy+gCt/846h9L/67AWflCs9NsF/TsWw6h9TJ
+7aUHo+jcoM1pGVb6TvEEy/7n7gl0H/kukD6ALxUfGsPdsPzCIUroRP7IxmnmsOYfi1zgqGb
pR1tvhdVYPmyr+5Xui/0SwD6Iyb9h8W+oYVHqPHWY42Y8/1u4+6EOiurf67/AMk5HmGj73NC
V+vWsNv7lFz/AMWM/im67/yVb8ap+HqMTu/5eZPbEds8/wBI3d/BL+xSup+7I6dV+9kh/wD2
0xz03WvfiV4//cm+mo/AvDj/ANSny/8Albp4do0C4tPi/aNP82Uuoa53TQ7SsXPM+L/TcGN/
il3U2c7I+z4mRkd663vHxAMfis11GzE6V0z95zH2j+TS31XT/agKz1zXprwdK3PrFzv3a97d
7k5166TZ7duPGMP3pdNrhHhoEipbO/WM/Ew+WtJyrh/Jr0rB+Lz+CVP611S6/mvDH2erw9R0
Otd8hDVCl1gzeo2Bm7MDWiikkCamg+mdx9vufM6/FG6S2tvT621u9Qgu9V8EE2yfVkGD9KUl
NtUcr9Z6jjYnNdH61f4SPbU0/wBqT8lfWMfXNPUS0FubdYBcOTTQRDHfyorBPtnVEqbXT/1m
+/qJ1bYfRxv+KrOrv7bpKStYvofZqfs0GjY30iONke1JJT//2Q0KZW5kc3RyZWFtDWVuZG9i
ag0zNyAwIG9iag08PC9CaXRzUGVyQ29tcG9uZW50IDEvRGVjb2RlUGFybXM8PC9Db2x1bW5z
IDk1My9LIC0xPj4vRmlsdGVyL0NDSVRURmF4RGVjb2RlL0hlaWdodCAxMDA3L0ltYWdlTWFz
ayB0cnVlL0xlbmd0aCAxMjkvU3VidHlwZS9JbWFnZS9UeXBlL1hPYmplY3QvV2lkdGggOTUz
Pj5zdHJlYW0NCv//////////////////////////////////////////////////////////
////////////////////////////////////////////////////////////////////////
/////////////////////////////////////gAgAg0KZW5kc3RyZWFtDWVuZG9iag0zOCAw
IG9iag08PC9CaXRzUGVyQ29tcG9uZW50IDgvQ29sb3JTcGFjZSA2MDIgMCBSL0ZpbHRlci9E
Q1REZWNvZGUvSGVpZ2h0IDEyNi9MZW5ndGggNDY1Ny9TdWJ0eXBlL0ltYWdlL1R5cGUvWE9i
amVjdC9XaWR0aCAxMjA+PnN0cmVhbQ0K/9j/7gAOQWRvYmUAZIAAAAAB/9sAhAAMCAgICQgM
CQkMEQsKCxEVDwwMDxUYExMVExMYFxIUFBQUEhcXGxweHBsXJCQnJyQkNTMzMzU7Ozs7Ozs7
Ozs7AQ0LCw0ODRAODhAUDg8OFBQQEREQFB0UFBUUFB0lGhcXFxcaJSAjHh4eIyAoKCUlKCgy
MjAyMjs7Ozs7Ozs7Ozv/wAARCAB+AHgDASIAAhEBAxEB/8QBPwAAAQUBAQEBAQEAAAAAAAAA
AwABAgQFBgcICQoLAQABBQEBAQEBAQAAAAAAAAABAAIDBAUGBwgJCgsQAAEEAQMCBAIFBwYI
BQMMMwEAAhEDBCESMQVBUWETInGBMgYUkaGxQiMkFVLBYjM0coLRQwclklPw4fFjczUWorKD
JkSTVGRFwqN0NhfSVeJl8rOEw9N14/NGJ5SkhbSVxNTk9KW1xdXl9VZmdoaWprbG1ub2N0dX
Z3eHl6e3x9fn9xEAAgIBAgQEAwQFBgcHBgU1AQACEQMhMRIEQVFhcSITBTKBkRShsUIjwVLR
8DMkYuFygpJDUxVjczTxJQYWorKDByY1wtJEk1SjF2RFVTZ0ZeLys4TD03Xj80aUpIW0lcTU
5PSltcXV5fVWZnaGlqa2xtbm9ic3R1dnd4eXp7fH/9oADAMBAAIRAxEAPwDq8f8ARdZy6+19
VV7fi2anfwS6X7H51H+iynkfCwNs/K4pslwb1Pp+Q36F4sonx3t9Vn/UlPj+zrOYztbVTaPi
NzHfwVhhV0z23dQq/cyif89jH/xVDq/tt6mP38Wg/wCbY4fxV/E9vVeos/eFFv8AnNc3/vio
dd9t+V/LwCfmy1v96R2V1b3Xf+THDxsoH33VqTPd17KPavHqaPiX2E/wUet64DB43UD/AMEY
VLE93Vupu/ddTX/4Hv8A+/JdVdFj7+uj/gMQ/wDgtn/mCTv0nXGDtjYrnfO54H/fEsX39X6g
/wD0baKv+ibP+/JYP6TqPUbuwfXQ3/rbJd+Lkv4qVnfpeodPx+3qPvd8KmwP+k8IWHktqxM7
qr9RZZZY3zZV+jrHzI0+KHm5Bry87Jbzh4raq/8AjbiXD+CndjBlfTujt+jLXXD/AIOgBzvv
fASUjGO4Y2F0p+tmQTkZv9UH1LJ/rPIatlUOnH7Tfk9ROoud6VH/ABVRiR/WdJV5EKLV6nkP
x8J7qtbrIqoHjZYdrfu5VbHx2HMqxa9cfpTACf3r3j/vrdfiUs7JYM02v91PTK/Wc396+z21
N+MflVrp2M/GxGtt1vsJtvd42PO533cIdVM83KbiYz7yNxaIYwcue7RjR8Skq7/1vqbWc0YH
vf4G949g/sN1+aSKmibHjoNFzzNvTrmCw/8AE2em/wC9qvXfo+uYzu19FtX+Y5tg/Kg+huu6
r0/tkMF9Y87GbHfc9oUDf6uP0bN/4RjXn+vW5h/6QCCmyz29dtH+lxWO/wAx5b/35UfrHo+f
38S5n3OY5Xr/AG9bxHf6Si5n+aWvVH606V0v/wCDyGn5sBH5EjsVDdu9Z1xqB45FA/6QKfp3
uyepWfvZRb/mMa1Lq2teGP3sqgflKfoxBqyLDxZl3v8Aluj+CXVXRbpUOtz7jw/Kc2fKsNal
0T34j7zzk322/e8tH4NCDgXeh0K3LPJ+0Xn/ADnx+AR8aMDotZd/2mxg53xazcUlOfV+tXsb
yMzOsud/xWJ7R/0wETIusstzL6j+luc3p2GfPm14+BJ+5BwX/ZKbcl+p6fiV1N87rf0r/vc5
oKs9MxiMllbtW9Or2OP72Td77XfIGPmkp06aa6KWUVCK6mhjR5AQnssZVW62wwytpc4+QElS
Wd1q1npV4rzDLyX3nwoqG+z79G/NFDVwq35N1LLRq537Qyx/KfpjVn4NE/JauZlNxMazIcN2
we1vdzjo1o+JQel1PbjnIuG2/Ld61g/dDvoM/stgKNn631NtXNGDFlngbnD9G3+y33IdEssd
rem9ONmS6XtBuyXjUusdq6PnoEkLNtqtyi20xh9PAvyndjZzWz5fS+5JJTPK/Q9Vwsj824Px
n/Meoz8WlULB6XRsqvv07L3jya2xtzf+i5XeqPF/SftdOpq9PKrj+QQ+PuQbmNsv6pQ3VmZi
tyK/P2uYT+DUlNjqHt6h02z/AIWyv/tys/8AkVR+t2mBU/8A4RzP86t39yPkW+p0/peV3F2O
8nzcPTP4uQPrnp0Vz/8AR2sP/VN/ikdiobhvdT+l04eOZTPya8ofSn+n0P13eF9h/wA95Uur
mDgeWQHf5tbyq0mv6pCNDZigD42jT/qkupV0VaxzPqzjY/59zKKvnY5u7+Kt9cIGAaQYF9ld
A+DnCf8AohRzWj1+l4o4FvqEeAprJH4qp9ZHue/ExK/p2ufA83AUj/z5KR2UhNzWYeO+we29
9nUr2+LGH9Cz5nYFsdOx34+Gxlut75tvPjY87nf3LKpY3M6sa2a49Lmjy9LF9rB/btk/2VvJ
BRUsJ/8AlLqzq+ap2O8PRodL/wDty3T5LU6llHEwrb2/TA21/wBd3tb+JVX6v4oqw/XP0rwN
k8+m3Rn+dq75pHspvZmU3FxrMl43emJDRy5x0a0fE6KqwnpfTTZaPUyXne8Dl99p0aPnp8E9
v651JlHNGFFtvgbXD9G3+yPd9yrZmU+3M3UjecZ/o4rTw/KcPc8/yam8pKXxcU2WtxHn1K8Z
3rZz+1uU73BnwZz9yStzjdJ6c59r/wBFSC6yw/Se9x1Pm5zuEklIulMb9ju6fZqMayzHI/4M
6s/6DlUwHubb0t1mrgLun3ebq/o/9QVdb+h604D6GdQHDzfSYP8A0HKhm/q1+X2FF+Pns/qu
Iqu/J+KSlaj6sgHnDtAPxov/ANil9dm7vqzmkcj03D/txilbXOD1zFH5tljmjysY22fvlS+s
P6z9WMp3O+htn/UvS6HyV1+q/wBYn+nVjP8A3XWO+6l6fNr29FxMX/SOxqo+Ba7/AL6gfWo/
q2O39/1W/wCdVt/irvUBOR0ynxvD4/4qtzkupV2ZP/S9eaO2PjOd87nwPwYsfqmV/wBkFlnI
6bjB4Hb1HyK/+k/8Fr4P6TqXULuwfXQ0+TGS7/pOXLAv6l1G+phO7qWa8E/u0Y3s+7dJCB/a
kPR/V3F9LB9d308iC0nn026M+/V3zWoma1rGhjBDWgBo8ANAk5zWNL3mGtBc4nsBqSnLXE60
XZ3U8TpDD7R+myCOzeP+pn71r5ORVh4r7iPZU32sHc8NYPidFk/Vpjso5XW7RD8959AHtQww
z74V279c6lXjDWnDi67wNp/mmfL6X3IDv3T4I5u6f07WD1DLeSSeDdZqSf5NY/AJuj4rSG5Q
k1taa8TdyWEy+4/yrXa/BVrCerdSNbT+r1gsLh/opiwjztcNo/kgq/mOdfYOm452S0HJe3T0
6uA0fyn8DySUwaxvUspt7huw8R80DtZc3Q2ebWcN89UlfYxlbG11tDWMAa1o4AHASRU4vqvb
03FybDN3S7xVkH+SD6Lz82uDkfrNG7Iq00yqrsN3mXN9Sr/pNUrKGnPy8J2lfUqPUb/xjB6b
/wAC0oVt1l/1fryo/T4uy1w778d0PH/RKCmOBZ9offOv2zAqs/tNa+p/4qVh9X6pO7zhbf8A
Nbt/gg9LLa+o49Y1aDk44/qBzciv72uRcUT9WbajzXXfWf7LnpBSD6yu3t6W3vbbH3hn8FpZ
EP65hs7VVXW/iyv/AL8srqx9TI+rjP8ASWj/AM9bv4K9k3CvqOdkHjFwQfm4vcf+pCXf6KWw
8kY/RsvqLvznZGTr3guDfv2hZf1JwiRZnWAxUwYlE66t997vnYY+SN1/fh/VCvEaN117aMZj
fF9hb/HlbXTcFnT8CjCZxQwNJ8XcuPzKXUeAV082ysr6xvssxKumUHbf1OwY4I5bX9K5/wAm
BaqzcVhy+sZOe4fosVv2TF8CfpXvHzhvyRKg27H4/TsIuDdtGMwBjB4NENaPisvLut6d0sMc
SeoZ7iX7fpbn/Tj+qIa1XciMrqFeN/gMQDIyCeN/+Cafhq5Z+A9vUs+/rmQduFi7q8Mu4IZ9
K3+5AqbePUOk4DWBgszLyA2sfnWEQ1v9VgVzDxfs1Ra53qXWHffb3e88n4dh5IWFW++09Qva
WueNuPWea6j4/wAp/J+5XEVLpK3g4+4+q8e0cfFJN4hxUnhNW85bmtyemYPWmCDQ5tlre4a7
9Fe0/wBX+CsYlbG5fUMB383Y71mD+ReIfH9oH71GulleXk9OsH6vnNddUOwLvbc0fMhyrYlr
22dPvs/nG+p07JP8pmrD97fxRQ0MCx1WXjh/0qrqg/4tFmI//qWLVxG/qPUqf3LskfJ0vH5V
kdZH2Tqtx4a7be35FlkD+1UVtY/9I6vX2c8WD4Ppb/EIBJc5/wClzfqyPCo2/wCbSP70XNJe
Oqgc3XY+KzzBDNw/EoWIN/U/q9/Iwbz/ANGtiLR+mvobz6/Ub7/7NDTt/FJTa6hV9o6z03Hi
asU2Zb/Isb6VX4uWmqOB+nzM3M5aXjHqP8in6X3vJV5OCGv1DJdi4llrBNphlLfGx52sH3lR
Y2npfTRvMsxq5ee7ncn5ucUOz9a6qyvmrAb6r/A3WCGD+y2So51lduW2mwxi4TftWWe0j+aZ
+G5JTn5jco41PSK3beo9Xc63MsHNdX+Ed8hDGq9Vj03uZhUNDem4ENIHFljOGebWcu81UxRl
WPfeQa+pdVAdrzjYjdGD+t/34+S2qKasellNQ211iGj+/wAygFM0bHoN1gH5o5KE1pc4NGpK
1qKW0Vx35cUJy4R4pjGyu97KKvADRoSVHJuNr9PojhJU/d9XgyW5PVKrDjjJpE34bvWrHiG/
TZ/abKz8yHnKOOZblVV9RxT/AMJTG/7wAtwHgjUcgrCtAwbgw/QwLhdX54mQfTtb8GOKuliD
X+tmyyjC6jX9CwbCf5Lxvb/FXulWepkWu/0+Djv/ALQD2OVTPxjb9Wc7Cgus6c94aO5bWfUZ
/nMKj9Vb/WGA4md+HZU4/wAqu4f3lDqnon6SGnK6baf8B0+38bWj/vqDhX+hXVknX7LhW3x4
vyLSWffEJum3enj3Xf8Acfp7vlNt3/kUsSr1MmvC/NnHreP+DxahY6f+uOAS7Kdzp+McXBoo
dq9jBvPi93uef84ot91ePTZfYYrqaXu+AEonKodQ/WcjH6eNWvPr5H/FVnRp/rPgJyFsM/Yu
mvzMvSyzdk5HjudqGD4CGhUHuLGelkje9zm5OexvL7X/ANHxR9wnyCs9Yy2eq2pw3VY22+9v
77yYoq+bvcfIJuj4r7Izsg7iS59U/nPf9O4/H6LfBqHgpvYWM+lr7byH5V533vHE9mN/kt4C
sJI+JR6tmv0W6lEmgrctnBx9o9V3J+inzL4HptOv5yNfaKa5HPDQs1xLiSeSqebJendkqhS3
Gp0A1JSVDPH2609LYSKiA7Ne0wRWeKgfF/5ElBSmOAXY1rum2EkVjfiuPLqZ+j8WHT4Qh9bo
a6gZJEikOZcByaLBts/zfpfJRyftDqqW3QzqNVh+yPH0bS0S7QSWtc3R08LRLmupLrm7GFhN
jHQYEe4EjRaTG4/SbfUyPTtM/bMc1295txyan/ewgrI+p4di5FWC8bThZmXi7f5Ja17PvVjp
nqMymNom2tmU04r+C9hZFoh0ERWWkz4JscVt+t+X9mO9jsug2RoG2+i8Wt15MQdEOye62Jr0
/qjfH08X/PueI/8ABFe+rg+0ZGbnH6PqvqrPnumz8gHyWbjFzcPqZaN/+U2ace0AbefF62vq
s2pnQcVtb/UdDje6CD6xM2Ag9wdEhuFF1VnYd1YqyusXaV2ya/8AiKtGR/WMn5o3VfWOBa2q
QXjbY8csrP8AOPjkw2dBqs/rpvOBi14ADcVxr/TH6DQYbVLRqQJ3cdk4oDTwqLer57xb/RqH
mzMI4fe4fzI8q2Q0/NdPoNBoBwFS6M3Ab02lvT3epjNkB5BDnPB95eHQdxdzKuoBRZMaXuDR
qStWqttFUeGriqnTxVvkn9J+aEbNNm2APZ3KizSIGgK+AG/VrX2m15PbsFTzco41ILG+pfYf
Toq/eeePkOT5I6zmveM2y+9hdl7HDCxZA/RtMOO/6G5x1OugVM3eqVwH4NTMSgi7qGSS99ju
Nx+nc/8Akt4A+SSJgMYyy4WPFmcdpyTBESPY1k/mDtCSSn//2Q0KZW5kc3RyZWFtDWVuZG9i
ag0zOSAwIG9iag08PC9CaXRzUGVyQ29tcG9uZW50IDgvQ29sb3JTcGFjZSA2MDIgMCBSL0Zp
bHRlci9EQ1REZWNvZGUvSGVpZ2h0IDEyNi9MZW5ndGggMzI3NC9TdWJ0eXBlL0ltYWdlL1R5
cGUvWE9iamVjdC9XaWR0aCAxMjA+PnN0cmVhbQ0K/9j/7gAOQWRvYmUAZIAAAAAB/9sAhAAM
CAgICQgMCQkMEQsKCxEVDwwMDxUYExMVExMYFxIUFBQUEhcXGxweHBsXJCQnJyQkNTMzMzU7
Ozs7Ozs7Ozs7AQ0LCw0ODRAODhAUDg8OFBQQEREQFB0UFBUUFB0lGhcXFxcaJSAjHh4eIyAo
KCUlKCgyMjAyMjs7Ozs7Ozs7Ozv/wAARCAB+AHgDASIAAhEBAxEB/8QBPwAAAQUBAQEBAQEA
AAAAAAAAAwABAgQFBgcICQoLAQABBQEBAQEBAQAAAAAAAAABAAIDBAUGBwgJCgsQAAEEAQMC
BAIFBwYIBQMMMwEAAhEDBCESMQVBUWETInGBMgYUkaGxQiMkFVLBYjM0coLRQwclklPw4fFj
czUWorKDJkSTVGRFwqN0NhfSVeJl8rOEw9N14/NGJ5SkhbSVxNTk9KW1xdXl9VZmdoaWprbG
1ub2N0dXZ3eHl6e3x9fn9xEAAgIBAgQEAwQFBgcHBgU1AQACEQMhMRIEQVFhcSITBTKBkRSh
sUIjwVLR8DMkYuFygpJDUxVjczTxJQYWorKDByY1wtJEk1SjF2RFVTZ0ZeLys4TD03Xj80aU
pIW0lcTU5PSltcXV5fVWZnaGlqa2xtbm9ic3R1dnd4eXp7fH/9oADAMBAAIRAxEAPwDr8qi1
lv23FG65o221drax+b/WH5pVfpl9Vb/stbpxrQbcInsJ/SUnwLD28Fs5GK+kzyzsVh9Vw7Kw
7LxdCHC17R+bY3i5o+Gjx3CsX1DD4Fo/WHEdV1GrLr0ZnsOJafC4fpMd/wDnNhB6la13WOk9
Ta2PtlVYe7sDXY0gfL1Ctl3o9c6Qdh2m0AtIOtdzDuGv8lwXM51z7OmUW/zZ6bnkWs/dbYN+
34BwhApCXMqIquwx9LO6vfW0eMN2n7mkrsGVsrY2tghlYDWgdg0QFzuJScnrtWgLMPIzch/k
97hXX/FdBkX141FmRZ9Cppe75dkYoLUdGV1YN/wPT273Ht61g9v+azX5qj0gHqnULutWD9Xa
TTgA92slps+esJsivJ+wU9MYSzP6u51mTYOa63e6539lsMHmtqiirHprx6GhlVTQyto7NaIC
SmanVW6x4Y3uoLTw8f0mb3fSd+ASlKgmIspCWY9OnDePMrOe8vcXHkouVd6j4H0W8KnlZLMW
h1zwXRAawcucdGsb5kqhklxFkQZ9tj3NwMd2268E2WD/AAVI0c/4nhqFjU15ZrNbdvTcWBjM
7WObp6h/kt/N8Tqg0Y9uS+2ix0l7g7qVzeC783FrP7rR9L/ar+bmUYGOLHNJOjKKGD3Pd+ax
g/1hNQw6n1Krp9LXOabb7Tsx8dur7HnsP4lJcy7KzMrPe3HAyuq2jbY9h/RY9R/wbH/mt/ed
y48JI8OiX0ggEQRIPZUsjBiX0/NqFHVen/RnqOKOxgZDR5HRtn4H4q3h5+LmsLsd+4t0ewy1
7T4OY7UKzGRGyiAXlfszuj9RdfUI6dmEDJZ2pu4bYP5LuHeCzPrJ08129Q2tmjqeKbCB2ycU
+qP89i73KwqcljmvaDuBDgeCD2K5bqGFkUVO6ZbLnM/S9Oudru2c0uP7wbI8wpRISCwghH9V
62PxsrqAO52fkOsk9mgCAPKZKsdUtrfdTi2u20MByss9hVUfa0/1n/kQ/qqGN+r2GWy1jmOd
7tCBudz8AFXwR+1My29wnHL22WT+c1n9Hq+H57viE7oFvUulgVWPL87IG2/JiGH/AAdQ+gz4
9z5q2nAJOmpVzGwSSH26Ds3+9IkAaqAJWwsXcfVePaPojxR8y7Y3YPpO5+CO5za2Fx0AWZY8
2PLj3VXNkP2/kyAUKYLFffb1LOAxjDK59F/ZjT7X5H9Z30a/vROs5lj7WdJxPdk5Am2NNtfm
e278iuUVYvS8JzrHhlbBvvvdoCQOf4AKDZTJ7sTpuFJ/R49I08Sf4ucVzFY6j9Zct1+M40Ye
tb8w6hrPzqsYdyfzn/wV9uBkfWHIbmdRa6jpVZnEwT7X2j/S3jsHdm+C2b8nGwqmM2xPtox6
h7nR+axg/wByW3mphg4GD0rFNWM0VVN91j3HVx7ve48pKDMO7LcLeogbQZrw2mWNPY2H8934
BJD66qejc9jBL3Bo8SYWZ1E9EscLrsqvGyGaMyK7GssHznUeR0U2fV3orTP2Vrz/AMIXP/6t
xVmrpnTaP5nFpr821tH5ArS5xqfrPTj2NqyLm59TjDcrEa55H/G1sDo+LfuV+zL6N1ak47cm
tzgQ5sOAsY8atcAYIIWkGtHAA+CBk4GFlCMmiu6OC9oJHwJ4SU8i+u+r6t43TsZ27qWXa/Da
IgbvUebrPINbJXQ9P6FXhY1eMx/sYNXRq53dx+KrnpmJ0XNZn01/qYa5jm6kUGw7n2sns8gb
/wDetwEEAgyDqCE7jl3RwhHVj1VfRGvieUVJRseGMLj2CaT1Kdmpm2yRWO3KyupZ7MDFN202
2uIrx6B9Ky130WD+PkrN1zGNfda4NY0Fz3HgALLdbRXY3q3UP0bwCzBxnEB7Wv77T+e/8Aqx
PEbWr9PxG9KxrMzqDxZnZJ3ZNg1Jcfo1VDmBwAiMwLMvIbl9R1DDONhcsrP77/37PwHZDZmY
DLPtnUcugXNB9Ov1GllLfBvi7xcqx67hdQ0ZlehhdzWHG60eW0HY38Slqp0rs6yy12NgtF17
dLLXfzVX9Yj6Tv5IVe/J6Z0Rv2jOvL8u7Tc73XWfya2DhvkNFUPWqI+x4DLcLGr0+0nGtP8A
2yz0zP8AWcnwrfq/hWOyGi+7Kd/OZd9F9lp/tOr0HkEqUqeudY/wX7OwncNsJ9Rw/lNbDvlI
SUL/AK4YhOzGLWlxgOvJDp8qWAv/AM6EkaPZL3CSSSsJUkkkkpZzQ4FrhLSIIPBBWbS/9lXN
xLj+o2H9Vtcf5s8+i4nt+6fktNZP1oY1/RbWPAc11lALSJBBurSUls6/04ONdDnZlg02YzTb
r4bm+0fMqtl5nWr6w2nEZiMcdH5L9zo/4uqfxcthlbK2hlbQxo4a0QPwUbqW2t2nSOChIEgg
Keat6PZltDeo5lt7QQ70qoprkajRnuPzKKzovSWa/ZK7HfvWj1XT8bNy07MS1moG4eSCQRyq
5sb6LULMTEr/AJuitn9VjR+QIvwEJJIKX3O8Slud4lMkkphZRRb/ADlTHzzuaD+UJKaSSnYS
SSVpcpJJJJSll/WX/kez/jKP/P1a1Fl/WX/kez/jKP8Az9Wkp1EkkklKQrMeqz6Q18QipJEA
7qajsBv5rvvUDgP7OBV5JM9uPZFOecK4dgfghuotby0rUSQOIdyqnIghJarq63fSaCkm+0e6
qZJJJKZKkkxICiXeCZLJGO5+iqZLL+srh+yLP+Mo/wDP1a0ZWV9Zt56Na2uPUdZSKw7jd61c
TCiOckgAUmnWLiluKzP2wcd2zqdDsQzAu+nQf+uN+j/aAWgx7LGB9bg9jtQ5pkEfEKKU59SU
s9xS3pkkhkmP0iqmYcCnQ04cQpYcx0l9oRTNJMCCnU4IIsaoUkkkipSiXQkXeCioMmatI/ak
BSSSSrJUsvr72CnEre4N9bLoZr/W3fwWm5waC5xhoEkngALJrxW9YFuXktP2exjqsJh0IYeb
vJziNPAJ0e6nWIBBBEg8grPf0apjzb0+x+DadT6Wtbj/ACqne37oQPq71d+ZjMx8wgZ9bSXg
f4RrXGv1W/NsHwK2EDcSpzPt/UMPTqGP6tQ5ycUFw+L6j72/KVdxszFy6/UxrW2s7lpmD4Ed
j8UZUsrpOHkWettNGR2yKT6dnzI+l85S0PgpupLM39Zwvptb1GgfnMiu8Dzb9B/yhWMTqmFl
uNdb9tzfpUWAssHxY6ClX1U204d4pkkYzlE6FTMEFJQSUv3g1tqilJJJKBKkklVzzlmoV4gh
9hh12h9Nvdwby53gPFIKc3rWY/IupwKROK7IrpzrPEPk+i3z0G7yW2AGgACANAAsTMGGOmYQ
wjuqGVTsJncXb/du3Qd3MytxOOwpTyV1NVGULXvNJxM6ygWt5rZl7X1O+G8iZXQ4ecX3Owsq
K82tu4sHD2THqV/yfyLF62zEczr9eQ/08V+NV61oDiWXQRXo0FxP0Dog3uy7um9Hf1BrsX6x
MMU1shz3wA20gs3NDXNhx3QPFONEC1PWJIGI/JdVGVWGWtO0lpBa6Pzm6yJ8CjqNSlXy8DDz
WhuTU2zb9F3Dmnxa4Q4fJWEkRfRTmfZeq4euJeMykf4DJMPA/k3NH/VBEp6zjGwUZTXYWQdB
XeNocf5D/oO+RV9AzPsf2d/230/s8e/1Y2fPdojfcKTpLFxaA5pt6HlPrqHFNzHuxz/ULw1w
H9V0JIUO6n//2Q0KZW5kc3RyZWFtDWVuZG9iag00MCAwIG9iag08PC9CaXRzUGVyQ29tcG9u
ZW50IDgvQ29sb3JTcGFjZSA2MDIgMCBSL0ZpbHRlci9EQ1REZWNvZGUvSGVpZ2h0IDEyNi9M
ZW5ndGggMzc4MS9TdWJ0eXBlL0ltYWdlL1R5cGUvWE9iamVjdC9XaWR0aCAxMjA+PnN0cmVh
bQ0K/9j/7gAOQWRvYmUAZIAAAAAB/9sAhAAMCAgICQgMCQkMEQsKCxEVDwwMDxUYExMVExMY
FxIUFBQUEhcXGxweHBsXJCQnJyQkNTMzMzU7Ozs7Ozs7Ozs7AQ0LCw0ODRAODhAUDg8OFBQQ
EREQFB0UFBUUFB0lGhcXFxcaJSAjHh4eIyAoKCUlKCgyMjAyMjs7Ozs7Ozs7Ozv/wAARCAB+
AHgDASIAAhEBAxEB/8QBPwAAAQUBAQEBAQEAAAAAAAAAAwABAgQFBgcICQoLAQABBQEBAQEB
AQAAAAAAAAABAAIDBAUGBwgJCgsQAAEEAQMCBAIFBwYIBQMMMwEAAhEDBCESMQVBUWETInGB
MgYUkaGxQiMkFVLBYjM0coLRQwclklPw4fFjczUWorKDJkSTVGRFwqN0NhfSVeJl8rOEw9N1
4/NGJ5SkhbSVxNTk9KW1xdXl9VZmdoaWprbG1ub2N0dXZ3eHl6e3x9fn9xEAAgIBAgQEAwQF
BgcHBgU1AQACEQMhMRIEQVFhcSITBTKBkRShsUIjwVLR8DMkYuFygpJDUxVjczTxJQYWorKD
ByY1wtJEk1SjF2RFVTZ0ZeLys4TD03Xj80aUpIW0lcTU5PSltcXV5fVWZnaGlqa2xtbm9ic3
R1dnd4eXp7fH/9oADAMBAAIRAxEAPwD1FJJM5zWNL3kNa0S5x0AA7lZ65Hk5NOLQ6+47WM57
knsAO5PZVsHGtfYc/MbGTYNtdfIqr52f1j+cUPGa7qN7c60EYtRnDqOm4/6Zw8/zfvWkjtop
zPrDp04P/cvxz/4MwfxWmsP663Ox/qzl3t+lUanj4turK22uDmhw4cAR80T8o8ypzcj9F17F
efo5NFtJ8ywtsb+G5c79Wmt6X1XP+r+QJwsqyw0NP0Q4/SYPJzCui61+jdg5Q/wGUwE+DbAa
nf8AVLH+suGW9QdkVHZZ6bcqt45DqCGWH5Nc0/JOjtXcKb2HVk0vsZUZzsGK3scYGRj/AOCc
f5UaT4rXxcqrKpFtRMcOadHNcOWuHYhZT8v1MfG67WIfQDXmsHPpzFg/sO9w8lcyMexln7Qw
IdYQPVqmG3M7f2h+aUDqpvpIOLk1ZVIuqMtOhB0c1w5a4diEZMUpJJJJSkkkklKWY/8Ayrea
R/yfQ6LXf6axp/mx/IafpeJ0U8y63KuPTsVxboDl3t/wbD+Y0/vu/Aaq7TTVRU2mpoZWwBrW
jgAI7eamSdJJBTj/AFsqF3Qb6TxY+lv32sVzo9pt6XiPdq41NDv6wG134hA+sf8AyWf+Ox//
AD/Wn6B7cF9HJx77qj8rHH+Kd+h9VMuvVmzo+VGrmM9VoHjWRYP+pQOruY7GwuokA11WMNs8
elePSs/B61bGCyt1Z1DwWn5iFldNp+2/VtuI8+70n4zj33Vl1U/e2UonT6qc/olxw+o5HS8g
ex1hoIOoLg3dS/X/AEtWh82rV6U52NZb0qwknG92O4/nUOPs/wAw+1c9l2/aKumdXafSGY1u
DlPOnp5DHfq9jv6tzS0+RW1de/IwqOsUsIysIu9ekclo9uRV8okfBOkPx/NTbyca6m45uEJt
P8/RwLWj8jx2PyVnGyacqkXUmWnQg6EEctcOxClVZXbW22twcx4DmuHBB1Cy+rjK6f8A5UwG
h+0g5uOdBZXwXjwezx7hN306qddJVsLOozay+okObpZW7RzSdfcPyHurKapSSSSSkGHiV4lI
qZLiSXWWO1c95+k9x8SjpJJKUkkkkpy/rJ/yU7/jsf8A8/1p+lfo83qeP2bkCwf9dra8/im+
sn/JTv8Ajsf/AM/1qVP6P6w5Te1+NVYPixz2O/AhPHyqdJZnRv0dvUMU6elkue0eDbQ2wfiS
tNZtP6L6wZDOBk49dvxdW51Z/AhNGxU4lWHXk3/WD6s2GPUd9sxfFvrjdIP8m1so31a6m+z0
rL/a7MmjKbxszaBtf8PVYJ+SB1+39l/XLpXU/o15VT8W8xyA4GSfLdKll4n2Xr2RiA+nT1YN
ux39mZVZlrh/aH4qTceYv+KnZ6d+pZVvS3aVibsP/i3H3s/sOP3ELSIBBBEg6EFZNtluf06n
qFDdudhuL/T772e26k/1tR9y0sbIqysevIqM12tDmnyKZLupx68H0cs4THmjIqaX9PyBruqn
3UPH5wYe3hwrmH1dlmU7p+W37NnsE+mT7bG/6Slx+kPxCN1LEfk0B1BDcqh3q47z2ePzT5OG
hVPJxcfruBVkNaGZNZJrLtHMsbo+txGo1EH70bBGqnXSWLhdTyMes/aw62is7LbCJtocPzbm
j6TfB47cpIcJtTtJJJJqlJJJJKcv6yf8lO/47H/8/wBallfo+vYNn+mpvp+Y2W/99UfrJ/yU
7/jsf/z/AFqXWPZkdOvHLMprJ8rWuYU8bD6qdJZmf+i6v02/9/1cdx/rt9QfjWtNZnX/AGYd
WT/3FyKbj8A8NP4OTY7qcn/GBQXdMxcgARj5LN5OkNeCwn7yE+ZPU/q5jZwMZOERvcORtOx5
/AP+S0/rRinK6BnVtAL21Gxk6jdX+kb/ANSsn6o5NVjbMR3voy6/UYDwYa0O++t7Cnj5R4FT
e6ZmRlVX/Rq6mC21o4Zl1Da8f22t/BWsT9R6jZgnSjK3ZGL4B3+Fr+/3D4rHw8d7X5HSXu2v
c79BYfzcigB1b/7de0/IrWeX9V6UzIpHp5tDt7Gn8y+qWuYfI6t+CR/NTqrMt/yd1AZA0xM5
wZd4Mu4Y/wCD/onzhXMLLrzMWvJr0Fg1aeWuGjmnzB0UsnHqyaLMe4bq7Wlrh5FMGhoqa2fj
WseM/Dbuya2w+rgXVjXYfP8AdKSXS8i0tswsozlYhDXOP57D/N2/2hz5pI67fj4KbySSSapS
SSSSnK+szg3pD3HgXY5P/b9an9Ygf2XZaPpUPqtB/qWNJ/CVV+ur/T+rWXZ+4aXfddWtHqlP
2jpeVSObKXtHxLSnjaPmptAgiRwVV6rQcjpmVS0S59Twz+tHt/FT6dcMjp+NeOLamP8AvaCj
xOnim7FTWwrGZnTaLD7mX0tLvMObquI6JY/BaxziS/p9tldh8RjvNdg+Ho2iP6q6/wCr5Len
Cg84tltEeAY9wb/0YXN5NbMXrvU2PE176szb41ub6N7R/YeSnx3kFOv1zGe3Mpysf6eQAK3d
vtFM2U/57dzPmjYeVWzNqya9MTq7Q4D9zIaNR/aaPvCjRTbm9Dswt363hONTH/8ACUEOqf8A
2gGlV8QNzabsNp9IZbRnYLv9HaD+kYP6luvwKXSuynQr/UOqup4xuoE2V+DbwPe3+2Pd8ZWm
sz/ljpIP8zktPzryKj/Bw+5WunZn2zEZcW7LBLLq/wB2xvte35FNP++pB1Sqyt1fUsdpddig
+owc2Un6bPiPpN80loJIXpSlJJJIKUkkkkp576//APiSzx3cKwPibWLdriyhvg9g/ELn/r+7
/seNf+myMev77G/3Lb6a/wBTp2K/96ms/e0J/wCgPMqa31edPSKGHmnfVH/FvcwfgFpLM6L7
HZ9B/wAFl2EDwa8NePyrTTZblTmdM/RdS6nj9vVZeP8ArrAD+LFmdepZX1/Duf8AzWVWce3z
a4+k7/z437lpu/RfWJh7ZWK5vzpeD+SxVvrXjG3Gx3t+kLDWPGbWlrf+ntTh8w8QpF0O6ynL
rZbzk1mmz/wxhn0nf5zIPyUcqt+Hl5AqEvxX/tDGaPzqn+3KqH5fmgOuLvUy6hLi2nqtIHi0
elkt+bVrdWcxteN1av3MxnBzyO+PaNtn3Ah3yRO/mpaqxmN1NltZnE6q0Oa7sLmtkf8AbjPy
KT/1Dqos4xuokNf4NyGj2n+20R8Qq1WJvoyujbtr8Yi/As8GOO+oj+o4FvwVxhZ1npJbYPTs
eC2wDmu5h1jza8SED/Yp0ElT6XlvysX9MNuTS41ZDfCxmhI8nchJNrWlNxJJJBSkkkklPNfX
zXpmEz97PxvuD1r9DM9Hw/5NLG/5o2/wWT9c/cOm1+OXW7/Ncz+9af1fdu6RR5F7f82x7f4J
5+QKY4f6PrnUa/8ASsovH+a6r/vi01h2Win650scYGX097WjxdVaHfketxCXTyU5nVf0eZ03
J4DMj0nHyuY5gH+dCn12tz+k5JZ9OpvqsPgayLP++qP1gaf2Vba0S/HLL2/Gtwf+QK+4MvqL
T7q7WwfMOCXYqeax3V1sot0NeJluocDx9mzAHs+Q3tWp0hjXYV/S7/d9ke/GcD3rIms/Njgs
jp9Dr6n4Lz7szEdST/w+G91X5CFewMonMw806N6nR6N3aL6ZI+8bgnlSKuyzGopynmbukWHE
yz+9jmAHH4N2vV8EYPVpH9G6lx4NyGj/ANGMH3hRya2U9WabBOP1Os49wPHqMBLP85u4IWPj
vyum39KtfGVguDKre/t9+Pb90fihupPlfqHUq80aY+XtoyfAP/wVn/fT8kkXHfV1bphbe2PU
a6rIr7tsb7Xj5HhJN8Ouym8kkkmqUkkkkp5v62a34A/ceH/+C0t/itLoGnTzX/o7r2/+CvP8
VmfWifttE8em3b8ftWP/AAWn0P8Amsv937Zft+G9PPyBTkfWS1+N9a/q5lD6Bffj2E9ha1rR
+K6lcf8A4xPo9JLJ9ZuW01Nby5wILW/N0Bde0ktBIgkajwKUvlipHlUjIxbsc8XVuYf7QIVb
olxv6TiWO0camhw8C0bT+RXlmdA0w7Wt1qGRf6LvFpscfwJITf0fqpzrP1XqFj+Psueywx2q
zGBjv+nqp3UvZX1HEqH6bDub1DEHk79IR/nB4+aXWhUcrqALordgj1iJ9tgefROnj5K1Np6v
hPLYyXYrhm1ae1hgh0/R0skaFSdlJ85n7S6T6uMf0jmtyMZ3g9sWM/uVY5TPWwus16UZbW4+
SPDef0ZP9V/t+aP0DTCcxnuxW2v+yWfvVE7m6HX2kluqq1DF+w9Trud/ksve6u4TA3H9I1rf
peyziB8E0deymz/Qer+GP1H7hkMH/f2D7wkh5Afb0RjOou9DK9ja7B7j64dFT2hkn3GDCSX5
7Kf/2Q0KZW5kc3RyZWFtDWVuZG9iag00MSAwIG9iag08PC9CaXRzUGVyQ29tcG9uZW50IDgv
Q29sb3JTcGFjZSA2MDIgMCBSL0ZpbHRlci9EQ1REZWNvZGUvSGVpZ2h0IDEyNi9MZW5ndGgg
MzYwMC9TdWJ0eXBlL0ltYWdlL1R5cGUvWE9iamVjdC9XaWR0aCAxMjA+PnN0cmVhbQ0K/9j/
7gAOQWRvYmUAZIAAAAAB/9sAhAAMCAgICQgMCQkMEQsKCxEVDwwMDxUYExMVExMYFxIUFBQU
EhcXGxweHBsXJCQnJyQkNTMzMzU7Ozs7Ozs7Ozs7AQ0LCw0ODRAODhAUDg8OFBQQEREQFB0U
FBUUFB0lGhcXFxcaJSAjHh4eIyAoKCUlKCgyMjAyMjs7Ozs7Ozs7Ozv/wAARCAB+AHgDASIA
AhEBAxEB/8QBPwAAAQUBAQEBAQEAAAAAAAAAAwABAgQFBgcICQoLAQABBQEBAQEBAQAAAAAA
AAABAAIDBAUGBwgJCgsQAAEEAQMCBAIFBwYIBQMMMwEAAhEDBCESMQVBUWETInGBMgYUkaGx
QiMkFVLBYjM0coLRQwclklPw4fFjczUWorKDJkSTVGRFwqN0NhfSVeJl8rOEw9N14/NGJ5Sk
hbSVxNTk9KW1xdXl9VZmdoaWprbG1ub2N0dXZ3eHl6e3x9fn9xEAAgIBAgQEAwQFBgcHBgU1
AQACEQMhMRIEQVFhcSITBTKBkRShsUIjwVLR8DMkYuFygpJDUxVjczTxJQYWorKDByY1wtJE
k1SjF2RFVTZ0ZeLys4TD03Xj80aUpIW0lcTU5PSltcXV5fVWZnaGlqa2xtbm9ic3R1dnd4eX
p7fH/9oADAMBAAIRAxEAPwD1FJJJZ65SSSSSnmvrH7s5x/0dNA/z8ur/AMitLosNf1FnhmWH
/ODXLM657szOP7jMAD+1kk/wWn0vTqPVa/3b2O/zqmFSH5VOX9fMZuR02lruA9wPwLHT+C2e
iZByukYl7vpuqaH/ANYDa78Qqv1nq9XCoZ2dkMafg8OYfyof1Qu39LNR/wAE8lo/k2AWj/qi
h+gPBTuLM6d+i6r1LH4Dn15DfP1GbXfixaazLP0X1hpd2ysZ9fzqcH/kemjqPBSupgV9R6bk
ES1z7MZ/hFrJE/Nizw19fQjEm7o2QSO5LaX/APfqnLR+sAI6W+9ursV9eQ2P+Ce135FChtbe
r5uM6DVnUsyGjsdPRs+8bU4HRS7Xto602xpmjqdIII49WrUH+0x34J879U6ni5w0ru/VMj+1
7qnH4O0+aotFp6FA92V0a4x4n0DH/SqK1suivqXTX1sd7cisOqeOxPuY4fAwUjv+CmvjfqXV
rsU6U5s5FHlYIFzfno770kGx93UOj051Tf17EItDO/q1S22v+1qEkvz2U7KSSSYpSSSSSnme
re6zqjv3bcCv7rGO/wC/LUwfb1nqbf3vQf8A9Db/AN9WX1DWrq7+xzsRo/snHC06NPrDmt/e
xqHf9K1v8FIfl+ilfWCB04WHiu6l3/gjR/FZ/wBWiacy/HIjfX+NFtlH/U7VpfWFs9Gyf5LW
v/zHNd/BZeKfR601/Y5d9R8m5FbL2f8ASYgPlU9Kszq/6PI6dk8CvJFbj/Jua6uP84haazvr
AxzukXvZ9OkNuZ5Gtwf/AATY7qbmVSMjGtoPFrHMP9oQsTHuPodEzzoW/ql39tuzX+2wLeY9
r2Ne3VrgHA+R1WA6lzumdWxGfzmJkPupnxluUz8TCdHspvVgUdcvpcP0efULQDwX1/o3j5tL
U/RCaqbunvMuwbTU2e9Z99R/zTCF1K5rsbA6vX9Gl7LHH/grhsf/ANUD8kS/9V63RfxXnMOP
Ye3qMmyo/MbgluP5dFKxv1TrGRjcVZjftNPhvEMuH5HJKXW2OZj159YmzAeLoHJr+ja35sJS
S6X9FOikkkmKUkkkkp5nK93TOpWfvdSYP8y6lv8ABag9v1jf/wAJhj/oWH/ySy7teg5T/wDS
dRD/AL8pi07ZH1jxz2diXD5iyo/xUh2+1SbrbC/o+c0cnHsj47TCwsp3pvvyBq5jcHOaPEN/
RO/ALpMtnqYt1f79bm/eCFz1DPtVeIz/ALn9JdXPmzaW/wDVoQ2U9Oh5FLb8e2h30bWOYfg4
QgdJyPtPTMW/vZUwn4xqrabsVNDoVzrukYjnaOFYY4eBZ7D+RDrAr6/kVnVuXjMsg8TU41n8
HBLon6MZuL/3HyrQPhZFw/6tLqX6LqXTcnsbH47v+uskT82J3U+KkXTMduR0fI6Xbr6DrcV0
/ugnYf8ANIUCbs/6ussH9MxgHDx9bHOv+cW/irGN+g67l08Ny6mZDf6zP0T/AMNqWB+r9Uzs
M6MtLcuoeVnts/6bZ+aX++pu491WXi13s1rvYHAeThMJKl0f9XfldNP/AGlsLqh/wVvvZ9xk
JIVrXTdTppJJJqlJJKNjttb3futJ+4JKeaJn6p1v7vyWOPzywtXM9vXOnu/eZez8Gu/gs2xu
36oY3m7Gd/nZDHfxWj1LTq3SndvUuaf7VTv7lIf++U6ThLSPEELncA7KOg2dmOsx3Hy2PaB9
7AujXNMlnRaH/wDcTqJc74faHD8jkIqdLoPsxr8U84uTbX8i71G/g9aazMT9D1zOp7X11ZDR
99TvxatNNlupzMb9F17Mq7ZFNV7R/V3VOP5E/wBYAR0x94+livryBHP6J4cfwlNmfout4F3A
uZbQ4+cCxg/6JV7KpGRjW0Hi1jmf5whHqCpo9TIqzOnZw+iLTQ8/yb26E/2gEup/q+fg5w0b
vONcf5F30Z+D2hVofm/VRpb/AD1dIc2efUoMg/5zFczGDqfRXGrm+oW0nwdAsYfkQEe32KYZ
v6r1XDzOGZE4l3xd76j/AJwI+aSe0ftfoYfX7bLqm2Vn921sOb9zwkl08dlOkkkkmKUgZztu
FkO8Knn7mlHVLrT/AE+kZr/Ciz/qSiNwpzMtpZ9U8Np5DcKfj6lKvdY9uR02zwyw3/OY8IHW
Wen9X6mfuuxG/dbUEbro9uE/9zNpJ+8t/in9vMqdNc49m7onWqx/gci5w/sbbl0ayMOoWWdZ
xTw+0yP+Nqamx6/RTK6wDq3TcoaNyqrKT5ktbcz/AKly1Vz7ri76v9Mz3aOxnY9jz4CRVZ+D
iugSl/YpzOu+yrFyf+42VU8nwa4+k4/5r1pqj1uk39Jy6xyanEfFo3D8isYl32jFpvH+Fra/
/OAKHQKaXRgGHOwzxRkvgH920C0D/pp+gksw34jvpYV1lGvO0O3MP+aQmq/Q/WC9nbKx2Wj4
1OLHfg4JY/6DruVVw3LqZkN/rV/on/htTj18rUro/wCgtzOnnQY9xsqH/B3fpGx8Hbgklk/q
3W8XI4ZlsdjWH+U39LVP/SCSXW/BTppJJJilLN+sX/ImY39+ss/zjt/itJZn1iP+S3N/ftoZ
/nWsajHcKY/WIR0iPC3G/wDP1al9YdOniz/R30O/8FYP4pvrJ/yU7/jsf/z/AFqX1jE9HvP7
prd/m2Md/BOHTzU6SzMEbetdTafzxQ8D+wW/wWkDInxWbV7frFkt/fxan/MPsagOqmri0G/6
u5mFEvrdk1NHm17nV/wWr0/IGTg4+QDPq1tcT5kaqp0n2ZnU8c9sj1flaxp/gn+r/swDjHnE
utojwDXnZ/0SEZdVOi5ocC1wkEQR5FZ31ecf2VVU4y/Hc+hx86nuZ/BaSzelfo8zqWNxtvFr
R/JuY13/AFQcmjYqW6l+i6l03J7Gx+O7/rrCW/ixLqv6HM6fmdmWmiz+rc3aJ+DgE/1gBHS3
3j6WK9mQP+tvDnf9GUTrNJyek5Da9Xhnq1f12RYz8Wpw6fYpj1yl9nTrLKhN2MW5FUc7qjvg
fESElaxrmZWLVe3Vl9bXj4OEpIXpw+KkySSSapSzeu+7Hx6/9JlUD7nh3/fVpLM6zrZ01o75
rCfg1lhRjupb6yf8lO/47H/8/wBaJ9YB/kTOP7tL3f5o3fwQ/rJ/yU7/AI7H/wDP9as9XZ6n
S8xn71Fg/wCiU4bDzU2KTNLD4tB/BUHe36xV/wDC4jh/mWNP/flawH78HHf+9Uw/e0KplDb1
7Af+9TkV/wDnt/8A31Abn6qVj/o/rBls/wBPj02/5pfWlgfourdRx+BYa8ho8d7djj97Esj9
H9YMR3a/HurJ82OY9v5Slf8Aoev4tnbJospcfOstsb+Uo/tCnTWY39F9YnjgZWKHE+LqXkfk
etNZnU/0fUemZH/CvoPwtYSPxYmx/YpvZVIyMa2g8Wscz/OEKt0S77R0jFe7U+mGPnuWex34
hXlmdF/RuzsT/uPkvLR4Nti1o/6SI2PgpXQSWYlmG76WFdZTr+6HbmH/ADXBJKj9B17Jq4bm
Usvb/WrPpP8AwLUket/VTpAggEEEESCOE6z/AKvjb0TCaHGwCloa9zdpcANDtDnRp5rQTDup
SzOp+7qXS6/+Fsf/AJtbv71prI6lm9Qq6hXXR01mTta449r72Vuc4t94raQToOUY7qZ/WT/k
p3/HY/8A5/rV/Kbuxrm/vMcPvBWN1LIzsj6v+pn4v2LIN2Pup9RtoH6evUOZotyyPTfPEGfu
R2A81NPobi/ouC48nHrn/NCF1L29T6U7xttYT5Oqef8Avqn9X5/YuH/xQj4dvwUOsfz/AE0j
6f2psDy2P3fgl+kfqpXVfZmdMv7NyCxx8rK3tH4wl1v9GMLK/wC4+VXJ/k2TS7/q0uvf0Wgj
+cGVjmtvi71BAUvrAGHo2WHnb7Paf5QI2DTxdCI6KdFZv1g9vTTkDQ4tlV8+Vb2l3/RlaFZe
a2GwbXloLm8wY1GirdWFR6Zli4htZpfuJ7e0po3U2+dVmVfofrBeztlY7LQP5VTix34OarfT
zacDGNw22+kz1Af3tolVM7TrPTjXrZFwe0c+mWj3fAOhEdVK6r+gy+n5vZl3o2f1bht1+DgE
kbrFpq6fY9tLMh4LBXVY4MYXlzQwuc7iHa+KSX6Kn//ZDQplbmRzdHJlYW0NZW5kb2JqDTQy
IDAgb2JqDTw8L0JpdHNQZXJDb21wb25lbnQgOC9Db2xvclNwYWNlIDYwMiAwIFIvRmlsdGVy
L0RDVERlY29kZS9IZWlnaHQgMTI2L0xlbmd0aCA1NDA4L1N1YnR5cGUvSW1hZ2UvVHlwZS9Y
T2JqZWN0L1dpZHRoIDEyMD4+c3RyZWFtDQr/2P/uAA5BZG9iZQBkgAAAAAH/2wCEAAwICAgJ
CAwJCQwRCwoLERUPDAwPFRgTExUTExgXEhQUFBQSFxcbHB4cGxckJCcnJCQ1MzMzNTs7Ozs7
Ozs7OzsBDQsLDQ4NEA4OEBQODw4UFBARERAUHRQUFRQUHSUaFxcXFxolICMeHh4jICgoJSUo
KDIyMDIyOzs7Ozs7Ozs7O//AABEIAH4AeAMBIgACEQEDEQH/xAE/AAABBQEBAQEBAQAAAAAA
AAADAAECBAUGBwgJCgsBAAEFAQEBAQEBAAAAAAAAAAEAAgMEBQYHCAkKCxAAAQQBAwIEAgUH
BggFAwwzAQACEQMEIRIxBUFRYRMicYEyBhSRobFCIyQVUsFiMzRygtFDByWSU/Dh8WNzNRai
soMmRJNUZEXCo3Q2F9JV4mXys4TD03Xj80YnlKSFtJXE1OT0pbXF1eX1VmZ2hpamtsbW5vY3
R1dnd4eXp7fH1+f3EQACAgECBAQDBAUGBwcGBTUBAAIRAyExEgRBUWFxIhMFMoGRFKGxQiPB
UtHwMyRi4XKCkkNTFWNzNPElBhaisoMHJjXC0kSTVKMXZEVVNnRl4vKzhMPTdePzRpSkhbSV
xNTk9KW1xdXl9VZmdoaWprbG1ub2JzdHV2d3h5ent8f/2gAMAwEAAhEDEQA/AO7+r2LfhUX4
2S5pv9Y22Cqt1dLTaA7bVu+kO581rLhsrpd2J1I1bM3NzxlU39NyrH2WM9KWeq17pFbdvumR
3XcqjMdb3XKXIdddZT1bLFl2dTblVNb09mG5ux7g3b72kH3bv3tIXXrjur9Nyb7ur3104GQx
5DRk5Tntsxy1jRE+mdG/SG08o491N7JwcjC+rNdWTdZfd6mKbPULTsd6tW5jdjW+0FdGsLNb
1Cz6vMZlVAZDbMcEVvNu5rbq/fu2t5AnhbGU4tx7XCz0i1jj6pG4NgfS294SP7Spp/V9r2dJ
pY9pY5rrWw4QYFjwPwUevaU4j+1eZjuPw3x/FZPSer3XdaxsdnVx1Gq2uw2VHH9AgtALXtO0
SOy1/rAx7ulvLGl72Pqe1rRJ0sb4JVUh4qS9YdhDCNebu9K57KmtrkvL3OGwNjzQcHq+B1oZ
ONSHgNBaS9u0PY4ur31+LZBCL1vFZldNtY5he5kWV7bPRcHsMhzbddpHiub+rGbk25IpwsPG
wq2tbWH2PttffRSdu+mza1rhJ58UgLj5Kei6Ba6zpGNv+nW30n+TqyayP+ir5AIg6g6ELmW/
Wktyq6MTFrbUbHHIaHe8B1/oCGsGj3OlxB7Lp0JAg33U5v1eJHTG0Ey7Gssod8a3uap9VfYx
tDqsF+fY2zfW1jmsDHNBhznPcPFUbetdE6HZm/a81kvt9Y0MBc9m4NDgWsk86q11I42f0c3+
ndfQQLRVW8473AdnOc6uB4yUa1voVNZua3quDlYnVKDg5VbnRjssDrP0YFrLKnQNx76JLM+p
7OlW9Sy8nFpx8cuYz0qGON1oiQ+31Xt4dIHtJCSdQ4uH6qQ47umZzt/VcnI/aeR9pJNdr2fZ
jjO/m2VMcIIbBHtMrqOjX5WR0rEuy2luRZU02AiDMckdieVzn1hpHSur0Z+JlWMyuoWGuyiq
mq64jYdpraWh0SADJhdB0QdY+xbusOYclziWtYAC2s/Ra/aS0u8Y0Ql8oKnQWVk2/WQXvbRi
Yl2NuO0vtexxb23D03CVqrgcrGIz3C6nqRvrzrbs59Drw37Kd3pFmx213LdGaoQF2p0KeqdZ
/ZTLHWupyr87IYaq2fabdrXO210h+1sNjl3AV/oVnULjm25HUbbgwlhxrcdlVlL9gPDZnxEa
FZVeXf03pWOOrYWbY6iwX4mQxxc8b3O9t7yfZDdHbuy3Ogk342Vlj0WvzLDYXUWm8gloA3vM
CW+A0CdLY6KcvB+25PXMG43Z2ZVT6hd9ox/s9VYcwtDw7a0uPaFudbyX42F6rcyvAhwBvtZ6
gg9tsjUrmui4/XKsvE3U24+N6rXPvvymvD3bXMuDWB7i71YDgOxXRfWIZH7MdZQQPRsZba02
CrfWxwc5nqO0bPihL5hspz+mZWZ1LC6rRZe3qNTW7cXIdR6VTy5hlm387a7lB+r1j/tGOb6+
qG0s2OdlhteO123UMrG0RppAVn6sYmbS+6zKym3nIrrstY242/pXl73OA4a2CGiNDCpHqOTZ
jYuPjV49RtzbacE3B1ppZjCz1LbNzpL/AGnvoCj3AUj6plvxuq9QNFtmFlVbH0Y+LjCw5Mtk
OufsO73S2JELpOk9S/aGN6jqn0WMhtldgDXB0An2ySB8ViVvwOsVYGd1UDZmN9Gutt1oa+8O
I9lTCA5pALtx7K39Xcvo7DZ0/CaxlzS9zn10mmu3Y4sLqyfp7fokyhIabahTnddx2Y9+YzGy
cyu7Im4Y+JQ3YXuHNlpZqHEay5dBbj/tLorsbKO05OPsuNZ3QXN9206zBQ8/pPTs/NZ9twvt
I9Mj1Xma2wfo7C7kz4Juk+l0+rH6O/2XMre+msuL/wBEx+0e8gcBw0QJsDuFNDEqyq7cPqWf
kNtoqaaqA2sYora8Q6y4Wun82NoSWb1bpmA7rVb8Hpr+pPwbDd1MvLrAW2tIFVYudtc8Tu2j
gJJ/j4Kej6hjZxyGZHTasUZBaa7MnIDi5rOQ1oZqdfND6N0nOwLci3KznZX2l280BgZVW8/S
NYlztfirHWeoO6b0y/NYwWvqaNjCYBc4hrdx7CTqsrIs6/0oU5+Zn15ddltdV2G2kMbFrgz9
C+dxLZnXlMFkdFPRLh6LOh49V7esZmVjdTqtu9SoX3sc6XuNfpMa6HAtiNq7Z7gxjnHhoJPy
WLg/WTGzsC3N+yWDJxW+o/EIabfTP0bKySA5pAkfclC9dFLdPuOB0Lp1vVs12I5gBtdkPbuf
uDoZY6zvB+KbG6t0evqVeN066rJPU7HF7anMiv06yd0MGu7b3V7Mvtyun05OBi154uDbGV3O
DG7HDcHS5rtfksnpTsvqmbVkW9Npwq+nX21myu4F3qNBrcNraxLdfFEagkqauVZn4/VsTo/7
UxawRbc2tmKz9DsG6v6TyATqr9tl3UvqfVkXPYb31V2mx7Say9rgQXMYDLTHCxcptl1mZ0zp
eHgdSPrusur9O22LZOuRc9zWhw8JXVUsvZ0NreqOZh2MpP2h2KS1lYaNfTdEgAIy6eanN+r/
AEjM6d1FxzbanPdS4VV41T21hhtNkOsdM7S6GjwQXYFuX1zPs6Vj4mK+girIyb2vte91rA9+
2oOaxoIIk91i4eT0fqOdVf8AtTJx8Cp4Ndb8i59+Q6faXsEiuvyiT5LX6z0uzqn1gsoorope
zHrtdkPNwfY1znMgtqsradsfnI9deymz1Oi/p2Fh512ZjjJ6c9zWOfWa6XC5vp+mK6tzgeNs
Kh0XIwsXJ6Wxxy7m1sdi1XOx3VY/rXuNj3l1kO90Q0LRq+rLsXo2RhnJrY9z25FVza/TZXZU
Q9rj7nEiW6yVlZP1jpyr6G9UzsNuPh2NyH14Hq5L3ur+jucGQxgdqUBqCN1PSdd9IYjbL+o2
dMoY79JbWWtLp0Ddz2uj5LB6Uej29exb+l5mXnW1erVkW3etaza5sgb3AMZ7gCum6hkso6fb
l7G3NqZ6oa9zWNIGsl7tBp3XF4X1ryKuoZd7Djtxsmyq+9lYuyDWza2tzt7GMYN23mYQjdFT
r/XCjpox7n5PUL8fJtpd9lxmWva1z2jQiurVxJSVv6zlmzD+0OdV09923NvYS1zay0loL26t
Y58BxCSX6CnYyKab6LKb2C2qxpbZW4SHNI1ELjac409OrtqzMLEx6C5+FgWh2VkB4LtrXOc/
eH9oaNF2y5RlHVa+odStdiV59IvcwsbWyjJbU9oc11Nw27+YMkHzQh1U9Cy6yzpovvpLbH07
7Mf84Etks/guKysnEysDAFNeLkuoxbrb6qbban1UMg+i57Du49pD+Sun6QzqlfQnNMjKi04j
LnixzWyfRZZYJDiBE6rn6jsY5+COpO6vaB6rXVNdRZb+c21wb6WyfA8J0dCfNTu9attr+r9d
+GXYrWNrfFdtdOyuON9rXNgeELD+qOS5/UjVVdkOD3PvuruyGHcX/SeK/QrLhPgV0XXsHLzM
Kg4zGW34t9WQMd5hlnp81z25080PqTXXdV6Q601Y4re6wFzx6zrCwt9Gto5GsuPkgCKrvanm
+u4nVm9XsZleymz1L8bJ6fXW25lNZbu9Rz31un3diV03Q7aMj6v1uZmXZ1RY9py7W7bnRIJL
dvI+Cxc/puT1Xr2Ra30L68OwU1HqDnOqFjmh7qqaKtoPaXPkroukZzsnEf6lLaL8R7qL6azL
Q+uPoce0gghGXyhTymbZiVYN92Iet221VvfW9zbWVhzWyC+BX7dFqfWB1LsDFyvteVRmZNQq
xqcEtFtz3gOa0FzSYHJ1gKpZ1/qWX0+hpyMat+ZTkZeSXs3V049Y2tpeN2u4na5x81d6lmPH
QumZbT+zqrDS3IvY0F2PS9nu2F4O2SA2ewR7eakfQOn5WOy7p3V6rjm5WOWvyzbZfRY2IcBv
MMcN2oj4KlVd0nGrx6MnKrGTVg2dPzMXGY65xJgNP6EHUR3Wj0i/6ts6jW3F6pd1DMeC1m++
y4aiToP0YVyh3T/q/XkfbcqqlmTk2X0g+10WHcWxy6DKF6ndSajGGV9Xm4bi4+pi+jutYa3H
2bJcw6hc1k9T6JXivdl5T7COnfYMwY1NljNzfzw/aG6GYXX4Wfh59Pr4dzbqwdpc3sR2IOoK
43qvVMt/1isqzn4mPjYb46fTlutZWXAT67g1m2x2unugIQuz9qnqLbXO6D61drqf1cP9W2ov
cGhoLi6nuY/NSRum3WZOC19mRTkWOBDrsb6E/wAmS7hJN614qbio5+N1a+xow8xmHTH6Q+kL
LCf5Jc4NH3K8sv6xDGGB6mQby1r2tbVjWGp1j3kMZWXNLdCT4oR3U0MPpmHTjdT6Lh9QtdnX
Nc6xtzoNbrW/TrraG7WGfzVmj6qdWsvZY3HxsCvbWwV0W2RU+syclm0NDnuHtg/Mq5g1no+d
juu6ZiYpzHihrq7TblS7UbnOb7hp7oK6lPMjH6qa2di25WOaasmzEeSD61O3fp294cNVj4PR
s3pvV/tL/wDKrcn2uzbiBk0CPoj801/1QD8VtZmXVh0OvuDyxsAitjrHa/yWAlZeN9ZRldTp
xacPKONa0h2Q+ixgZYOA/e0Da4d0I8VGtlKy+g4n7UZ1J+Y/Hq9VmQ/GlgqfdW0sa+XCRpzB
Wh03BxcLG9PGJe2xzrX2udvc97zLnud3lc/11lNPVr8i/HxupAUNt9HIt2Ox6me1ztpa9u1x
1nlXfqkcd2JkPx7aCx9277NiuL66JaPYC4AyfpHQBEg8O6nHyr39B6xk4uzBzDl1i81uq9PI
u3PcPTAqDw4iJ1auns6k2rox6hm4z6AKg+3FdDngnT09NJWcMzonTM3J+xYN+TlOsJy7sal1
pDzqWutd4T9EHRateRi9T6e6yloyKbWuaarBtkiWure1w010MpS6afVTmHqvU8Btd2V02nFw
7LGVltdzTa31CGg7AwNdqdQCo9Vpuo63XkYdlLszMq9NtV9TrS1tMvL63MI2D3QZ0JhZWVQ7
pmJflfsN+Jl1Vudj5VTxmNreBpDSdzfk1aX1je443Tc2qu/7Ta9tTX41jarWi5m5zf0jXNdO
3g90a1FdVLfVXqFeRkZBuF/23MaMh77qm0scxh9GK2Me+Np0M6qx1npnVeqdQxmU2NwsTFl5
ymw+5xe0sdWxjhtaI/OKo9KzumVdR6fi9Pcy5hrsoNdm77bU/W21127s4j3SOVu9Sv6lS1n2
GqmzcYe/IsNbWz9HhpmUDYlp17qZdM6Vg9Kxvs2FX6dZJe88ue8/Se93clJUekN6nR1HJq6l
n03OvHrVYNYdNQ+iS1zzuLNOISQo8W/janZQsnGoyqH4+QwW02CHsdqCEVJMU0MLoXScC31s
XGay6I9Uy98eG55JV9JJIkndTndfszq+mWPwd4sDmmw1AG0Vbh6hrDtN23hY+Ll9Yy88Z+Fb
lfs5+TTW2m5jQ11OyLrAHN3gB0aytX6y1G3o149RlbWlj3i1xZW9rXAmt7hqA/hcr06ilv1h
qr342HZ67Xsorssc6gNbJxa3bRU71PpOH4KSHy/ap0frMbqs/I+xWXMbdig9WdXWywMxxuaL
G73NO6N2glaH1bsw7Lsqyiu6iyxtBdVftk1tr2VWAtJne0azqm+sFPRDkVWdQryXWlmyMZtz
hZXM+nb6IIc2ezkvqs7DH2yrG6dZ08NtkPsZYxtrI9jm+rroNNvZIn0dVNXqD8XDzr2/bc/p
dFr91r2VB2OXuAlzbXVv2z37LR+rV2NZg2140GqjItqFm/1DYQdxtc/uX7pKz/rB9YMnAyLs
ay+vBqc6llVz6y8+m+fWtaPov2/R29uVb+qYAwbxW1jsc3vdTksq9AXggE2emIHOkjmEj8qm
OWOv1Y+RazNxc3GDXi1ljfQLRBkC1jnAEeYRen49+R9W8Jr2VXZVdVT6xY/fX6jI2u9SuZjx
Cq0fVvMxLczKwL2Y2TkZFlu1wNlNtdkOi6uR7gZgtWt0fp7unYDMV7xY8Fz3ua3Y3c9xeQxv
ZonQIEitCpxupH6xtDLP2dWbxdSTk4VgLnMa8b22Nsax23bPcrQ+smMbMWnJbbTUcG5uQBlH
bQ4iQBYRxzIPitZDvZTZU5uQ1r6ol7XgFsDXUHRDi1GmynmcZj6cnC6pm9Rb1AOvLGV4+11d
VmVLf52S41t4AKSr9TyPqc7Ix7MTGGXc29heentdvbtMteRSNrwCNQUlJ40fsU9kkkkoVKSS
SSU1uoYLM/EdjPca5LXNsbEtcxwe1wnTQhZGH9Ws6u79d6gMjFGR9rGOyltc2zukv3OMbtYC
6BJESIFBSkkkkFOb1DD6vbd62DmV1tAAGNfSLKyR33AteJQehs6sM3qNvUqRR6j6vR2WepW7
aza51fdonsQthJHi0pSkkkkFKTEAggiQeQU6SSmLGMY0NY0NaOA0QPwSUkklMtoS2KSStkYj
+79qNWG0pbSppJpx4v3gPqqyjgpIiZNOKHSYVfgwSU9E3tTTiHScftTbFJS9qaG+Kb7f9aP2
qtZJPDfFKB4ocB7j/GClkkoHilohwnw+1SkkkkqU/wD/2Q0KZW5kc3RyZWFtDWVuZG9iag00
MyAwIG9iag08PC9CaXRzUGVyQ29tcG9uZW50IDgvQ29sb3JTcGFjZSA2MDIgMCBSL0ZpbHRl
ci9EQ1REZWNvZGUvSGVpZ2h0IDEyNi9MZW5ndGggMjUwMC9TdWJ0eXBlL0ltYWdlL1R5cGUv
WE9iamVjdC9XaWR0aCAxMjA+PnN0cmVhbQ0K/9j/7gAOQWRvYmUAZIAAAAAB/9sAhAAMCAgI
CQgMCQkMEQsKCxEVDwwMDxUYExMVExMYFxIUFBQUEhcXGxweHBsXJCQnJyQkNTMzMzU7Ozs7
Ozs7Ozs7AQ0LCw0ODRAODhAUDg8OFBQQEREQFB0UFBUUFB0lGhcXFxcaJSAjHh4eIyAoKCUl
KCgyMjAyMjs7Ozs7Ozs7Ozv/wAARCAB+AHgDASIAAhEBAxEB/8QBPwAAAQUBAQEBAQEAAAAA
AAAAAwABAgQFBgcICQoLAQABBQEBAQEBAQAAAAAAAAABAAIDBAUGBwgJCgsQAAEEAQMCBAIF
BwYIBQMMMwEAAhEDBCESMQVBUWETInGBMgYUkaGxQiMkFVLBYjM0coLRQwclklPw4fFjczUW
orKDJkSTVGRFwqN0NhfSVeJl8rOEw9N14/NGJ5SkhbSVxNTk9KW1xdXl9VZmdoaWprbG1ub2
N0dXZ3eHl6e3x9fn9xEAAgIBAgQEAwQFBgcHBgU1AQACEQMhMRIEQVFhcSITBTKBkRShsUIj
wVLR8DMkYuFygpJDUxVjczTxJQYWorKDByY1wtJEk1SjF2RFVTZ0ZeLys4TD03Xj80aUpIW0
lcTU5PSltcXV5fVWZnaGlqa2xtbm9ic3R1dnd4eXp7fH/9oADAMBAAIRAxEAPwD1VJJJJSkk
kklKSSSSUpJJJJSkkkklKSSSSUpJJJJSkkkklKSSVTq+Rbi9KzMmkxbTRZZWSJhzWFw0SU20
li/U3qWX1X6s4HUM1wfk31l1jgA2SHObwPgtpJSkkkklKSSSSUpJJJJSkkkklKSSSSUpJJJJ
TwHpZv1p+tGb0V+dkYvSOhV11WNofssvtIjc9417Fa/7Bv6J0LrFIz783DsxrDj1ZJ3vqit+
4CzkgrKvHVPql9beo9WGBf1DpHWA19jsVu+yq1niz71rVdX6p13o/VnO6Xdg4xxnswxfpda5
zHz+jHA4hJTzf1R+qGZ1n6qYeRmdWyqG+mRgUYrzUyoBzoc8D6bi5b31C6l1Lq/1VsZlZBOb
j2XYgyiJd7NGPM8kSrv1DxsjF+qHTcfJrdTcyoh9bxtcDvcdQVz/ANV+kdZH1J61g112Yufk
X5P2ffLCdwEEHz8UlNLrvTvq/wBOw8m1v1pyXdepY6xljsqd1jfds9JukE6QtTP+uWfi/wCL
rD60HNHUcxldItcPa2xxLXWEeQaSsfAea/qu7oWF9WLx1n0HU5NttLWsD499pvdq6eQFo/8A
NjqPU/8AFlgdOZWauo4oZfVTaNpL63OOx27iQUlOTn3/AFfw+mPz+nfWy+7r1DPVD3ZDnV2v
b7jX6RG2HcALshbf9Y/qnhZj85/SG5NbLsq6ohrtse9oe76IJ7rKp+ttIqbRk/VfMHUg0B9L
MZhYX99tnESifX3A6n1DofTLqMF9tGPfXf1DpdZ9zqgJNcN0dtSU8/1LM6R9Xs7p2V9Wuu25
lrsplOZh2ZBva+t5hziCvVV5d9Y329bxcCvof1evxMPGy6bLbn0tpdzG1lbfcQO5XqA4SUuk
kkkpSSSSSlJJJJKUks1vULhzBRW9SH5zPuKecclvGG6kqzc6h3JI+KM26p30XgppiRuE2O7N
JJJBKkkkklKSSSSUpJJJJSkkkklKSSSSU4aSSSssCk6ZJJTNt1rPouIR2Z9zfpQ4eaqpIEA7
hIJHV0WdQrP0wW/irDLqn/RcD5LGTgkcJpxjpouEy7aSyq8y5neR4HVWquoVu0eNp8eQmHHI
eK4TB8G2kma5rhLSCPJOmLlJJJJKUkkkkpw0kklZYFJJJJKUo2OLK3uaNzmtJa3xIGg+akqH
V3h9Qw210ZNl+pxLrPSdYwc+mf3gUlNPB6j1P18EZV1dw6i0udjCs1W0QC6eTLWkbTuW2sT6
tsuL8u0i+rGa/wBGijJe217HV6WgPEu27uASttAbJKkkkkUM2WvrMsJBVynqHa0f2gqChddV
RU+654rqrG573aAAIGIO6QSNnda9rxuaZHkpLnem9YxMvc/BvFhrIFjdQ4Txua6DqtnHzWWe
1/td+BUUoEajUMgkDvo2Ukkkxc4aSSSssCkk6oVdawX5f2K3fi5ZJaym9pYXx3rP0XfIpKby
4/q/VGP6ndTmBttTfUbRhZNJa121rPTfTbG8ue8kaFdN1LN+xY3qCs322ObTTSDG+x52tbJ4
HiqFF+Zj34WHn4zMSreW476HC6pztpIqf6jdzD3BCB7JDqYmLRiYzKMesU1tEisawTqZPcyi
rNz+uU9Oza8fKpsFVzS6vIrHqD2/S3sb72geMQruNlY2XS2/FtZfS76L2GQipKkkkkhXmeBy
ua6v1/FysM0irdVa5ri15LC6qZrtbY0OZXLh7fU5XR2WV1Vuste2utolz3kBoHmSuaq6afQI
6Rm1sZ1ImrKorByMcAA7vTdzUdnG7RA2kOh0u6vO6pkZr7C3JZW2kYj6zXYysndNh4fJ4I0W
uhAUYeKJO2nGrA3u1IYwdyhYHUsXqFbn0FzXMcWPrtaWWAgA6tdrwQUQp1cbNcyG2at8e4SV
RJDhF3SuI1SkkkkUNPquUzHxSCGPfcfTZU+0U75+k1rzw6OFldJw8i3qTH2jNZhYTN9FGbtd
svdLDss1c9oZxqrnXRkCh9+7GdjVtPqYuc1ortPPtt3S09uE31VFI6LSaXbmuc9xA37Wlzp2
M9XUtbwDwUOqejV+svUcYOGE51Npr23XUOe+q0Q7dW+uxrS0GR3Uul5+P9Yc0ZbbLmMwHBww
n1hrW2kFosNmu/QmIVDNq+sg6tYxt9b8jcX9Os27XemdfTPpy/a3g727T4rohZ1B/Sw/IqZX
nGv9NU1xLQfztrmS7jiEOqejgZPV7r+pvzMW5lLMUW0ttqi5xa21lbhdW4gQ55lsGV0PT8Fm
BjDHYd5LnPss2hu57zuc7a3QLmm09Gx+qVO9erNtO0015LfTyA4uGwPsaBx29VvPddeUR4oK
ySShkPtrosfTWbrWtJrqBDdzo0EuIARQ5XVyzK6lgdOc0O22jIspt0ruraHNIaeHOrMO2qFd
WO76xtf06l1IpZYzqNjWGuqwkD0m8APcDrI7LH6oOsWvxreruooyntLMCgCwPZduB9Sp2P6z
XP4Hw7LrsYZow6xlFhywwCwsnZ6kcie0oblc4vXas/L6h+zsWzdVfj+rfjWP9IODXQPQsaNw
fPPI8U31XwXua3qdt1lu71W1NtYGWS9w9R1rmkh59oAI0hYjxUOp1O6u60hjgzLZk7zW9xaX
W20khpbtMNaGdudF2+N9n+zVfZdv2fYPR2fR2RpthAb2VHZIkkknLX//2Q0KZW5kc3RyZWFt
DWVuZG9iag00NCAwIG9iag08PC9CaXRzUGVyQ29tcG9uZW50IDgvQ29sb3JTcGFjZSA2MDIg
MCBSL0ZpbHRlci9EQ1REZWNvZGUvSGVpZ2h0IDEyNi9MZW5ndGggNjE5Mi9TdWJ0eXBlL0lt
YWdlL1R5cGUvWE9iamVjdC9XaWR0aCAxMjA+PnN0cmVhbQ0K/9j/7gAOQWRvYmUAZIAAAAAB
/9sAhAAMCAgICQgMCQkMEQsKCxEVDwwMDxUYExMVExMYFxIUFBQUEhcXGxweHBsXJCQnJyQk
NTMzMzU7Ozs7Ozs7Ozs7AQ0LCw0ODRAODhAUDg8OFBQQEREQFB0UFBUUFB0lGhcXFxcaJSAj
Hh4eIyAoKCUlKCgyMjAyMjs7Ozs7Ozs7Ozv/wAARCAB+AHgDASIAAhEBAxEB/8QBPwAAAQUB
AQEBAQEAAAAAAAAAAwABAgQFBgcICQoLAQABBQEBAQEBAQAAAAAAAAABAAIDBAUGBwgJCgsQ
AAEEAQMCBAIFBwYIBQMMMwEAAhEDBCESMQVBUWETInGBMgYUkaGxQiMkFVLBYjM0coLRQwcl
klPw4fFjczUWorKDJkSTVGRFwqN0NhfSVeJl8rOEw9N14/NGJ5SkhbSVxNTk9KW1xdXl9VZm
doaWprbG1ub2N0dXZ3eHl6e3x9fn9xEAAgIBAgQEAwQFBgcHBgU1AQACEQMhMRIEQVFhcSIT
BTKBkRShsUIjwVLR8DMkYuFygpJDUxVjczTxJQYWorKDByY1wtJEk1SjF2RFVTZ0ZeLys4TD
03Xj80aUpIW0lcTU5PSltcXV5fVWZnaGlqa2xtbm9ic3R1dnd4eXp7fH/9oADAMBAAIRAxEA
PwDuUz3trY6x5hjAXOPOg1PCHi5mJmVetiXMvq431kET4HwVHrvUKsWhte+v1XkP9F93oPcx
pk7H+M+Ks2wuFmGm7LbkMDOoN6g51Yu6Zd6GSWhpcWW1E7Xw0ROhW/n5v2PpTDitdVfY1teH
SazY/fGjfSkTAGuqpdG6r0TqPVbnY7Kqs8Vguq9NouAn3u9Vktc06cKz1jpWXmZOLnY1zfWw
HepTjWgip5Ih29zfdxx4Jo2NJcTEwuo5+bY67KGH1ZrxkTbjGu5rAAz9ERY5rq40I1W91z7J
Z0zKda9znYLTcfQeWWMe1stPs4QC/Mbd+2esV14VHT6bNlTLPVcS+N7nPhoj2+0LItz83Nzv
2z0vByGAUhjQGssrydZcy/03mIGjTyEtvqrd0ehXZ37Q9C7Jp6jGJXZfmNaG2Nc76FTnsO14
5K31TxG4GDhNtbRX02qyH2VENYGvf2eRpM6K52nseCnBBUsj6zWspxMe3JBdgNyKzltb9ItB
lkN/OAdq4eC0czLpwsS3Lun06W7nAak+AHmTouYzMTqAya+p9RddRR6odONkeocV9nsaX02M
LY90GOECoO5+ycC3JZ1PCece6yHutxjDLm8xY36Lp8eUL6xZTqqKHUtGU9uQzfhN9z7QPcQ2
DLXMjd8la6T0xvS8Y4rLn3tL3Pb6kabtS1oaAAFy2XgY2P1DPzmY7c7Dxrm1273lmV69kbm4
9rILo3DRyR0Cg9NgUYF97+r0MpecpoNV7GbbdsQ4WO8ZV9Z9VXT+hYJ9Ntja7LN3py62x1tn
5rRqSSrePlY+S0upsa/bo9oILmO/deBwfJEKSpJEhoLnEBo1JOgASSQ5v1exbaOmi2+ftOW9
2RkSwV+5/wDIbxoAud+sfVrvthtY/GuxajuxrWPY62ojRztPcJ7gtIXXZv2v7JccIsGUGONL
rPob403eS4/ouXnXWNvq6dRlUXPAz8esNBrc4/zwqsEtnmWktcmnoFw7u70TqtV/Q/2xmU1Y
oY1xstqDS1zGf4RpYOD4KN2d9YW4TsnCqo6nVaz1MW2k+m+Dq3dW/R2ngVY6q2mx2N0mqh1g
te211VW1jRVU4Odun80mNBysrBsbkWeji21jp+BlOy/Wc51d1NYLnPqNJAlpMgOmIR8FOj1D
Ixc7OwOlXPNTrduXdjuaZc2v3NqceAd2sHmFQp6PZX1ai9rXY2blZFmTlPocRU3Hr9rKXNb7
CXadp5Q67/tuLn9Rez7Hn49tWfU9254NIafRJaBuDXM3BwC2Ol1ZGLjZOZcG2WZln2kY+O4u
Zq0ANrL4kuiUN1bNfr+ZhFwwcq23GaRv+0VBtrGn926r3Hb8Wx5oP1Yp6gyprnMFOG8l7HML
iyxoJaAKbfdVP0vaYQj0rKOSMf7PQL3X/a2dR3huQ2svDnB9cbiY9nO1dJa54re6tvqPAJYy
du4jhs9pRG9o6Od1HO6Hf6nSs7IY11oDLGFxbBPuaN/DXdxqhN6A9rWYwynOwi8XZLXjddfY
Hbhvt/d0GgHZU23PfTl5VAodiXWEdQ6Z1D2OqvdDXe8B30tO3wR7n5XSOj42L67WXNcBe9n6
V1VBJLnVsd7nNZoJPZLzUj63gZWVbdlWNs9Zrm4/SGUvLSx7/pZDy3j59h5puidObd1DJyct
rMu7EsDK89m5guta2HudSDs3s+jvCuYGfksy6sTIyKs6rKY5+JmUwCQwS5trGkjg6OCn1Kqy
rp7sDptbq7HNLq21AtG0OBsa2zhr3AmEq6q8HK651Rr8rIxMqix9GG4ODKd1VujQ43+uS1rW
wS0NGpWv0fpOP09j7KTJyA0gbQwNrA9jNo7idSdSVT6ViMsybGjGvZ0xrWPZj5wLi3IBPuq9
QuMRz2nhXuq9SZiVGtha/LsbNeP6ja7HNmHOrL9C4dh4pDuVeDm/WTquMce3BdvrrFrKrcva
H1MsEWem9m4Pe3b9OOAklVg9O63dXdj237RU6vLdLWuLjta+u+tw3NscBq4dkk3i9VWNvwT0
Z/WyjMdh/aqri3Fx2u+0Y7LHUvs3Q3a2xgOvYAhN0PpmOMlmW+rNx8rEr9EVZTwW7HD6LXM9
rwPwVnqH1bw8yx19VluJkOe21z6nSxz2GWusqdLHQtCo204odm2tssraXXXNbsaY1LtsmNE6
tbRejzfWMlmTl3steG5mPYKOn4THOpyHb9s2C5upa8HiIUm+gzB+3Ye/FbZsw3Vw2yyqihzh
d6QO71fdqTqtvprX24zMrJaDdeXWNLgNzGP+ixp5HtWbldJy6Mpz+mY1F1b6BjY7nvLHYrhu
Dns0Mg7pMayhXVNudRb+2s3Ctde0VZtVlLm4dhbcypmuzJEQQfgIJ0Wn1fdmuf0bGFFNGO2r
1rsgOLWufpRXUGOad2nMqXR2t6Zi5l+e9tePRZsZlXtayx1bAGl9rwBuBfO0nssTKyaj1JvU
sP1etS7cwVVWNsbEhjp2+jb6c+3dB80unmp1vq/X1SvMuxsy5tjsOK7G2De8NeN1bqr9HFju
7X6haeZlZ1Dm24uO3MxhIuZW4C5pHdgPtdHhMqGFRT07Fsysi177byLcm+4APLiA1rS1ugjg
NCq9RpyOk3P6n0yl1zbzty8Jn59jtK72jsQ7R3iEdgjq1W2dM6lfb1t5sop6fYWZNDmkes6r
3UOsY4A7ml2gSsw+pX35OU3HbjDqED7Ve4MysdgAa9jAzdO5oloB+Kt9RGZX0pn2trM+kMLe
rNYIsIP0n1Fvevw8FWx+l493UDVjZ78jHb9ny7m2TY/c0fodtxMNBGsQgltfV/GqxsAZuTTV
j3WbpvLW1PdVP6M3cAOcNSszHz89gsytr25u17s2/Ne+vDqAJLa6WAw8wNC34qz1jJoz+o0U
4wo6qam2bsB1zWgXGNtjw76bWidBqE/SPUzsl1eZbX1DDx2NduNIZTTkAx6dG4AkNb4peAU3
q8+rD6FRmOocwGussxgS52+yA2sF3i491zXWsvPoyg7qDcbLyGPL68BhFttbHD3VE7QHNeB9
H6QOoV/qtnVMotft3jLs9HF6LYNptqYZdc94h1ThEh3bRF6fT05+KM8O+x9Kw7vVtxnMPq/a
ajtPq3S42Q7iOU2cqF9lAJbek0YmFb1LoOM6nPzqmN2F5a8VkhzvTrsMeo0cBJCLeh352cz6
w7W5ZsLsd+Q4sjGIHpnHdIiPzo1lJVOI8XF1u9tF9dG5jY/V2dTrnqFebiUNc2+tw2XD1ACx
z9ntdxoYCs9Vm5tPT2nXMftfHapnvsPzGnzVf6u4tQxRnMvsyXZNbK2uta1jm11S1tZDNCWm
de6sYn6z1DJzOWU/qtH9n3WuHxdp8le6ebGm6hknFxHPqE2mK6GeNj/awKWHjNxMWvHB3emI
c48ucdXO+ZVf+ldV8aenifI32D/vjPyq5bbVTW6257a62CXPeYaPiSipB1HCOdjGgXPxzMh7
A13HZzXgtc3xBWX0jpXU8DN2OeK8QAuPoO/QWeRosk1O/qGFSZ1W+mh+RZ1N1PUWA2WYeU0f
Z7QNWjHIaDtcPolpPmugvzjVgNyvTIttaz0qD9I2WAbWfedUNDqrUI7P1zqLaecfBIst8HXH
6Df7I9x+StZFttVD7aajfY0S2ppDXO8gXaKGDi/ZcdtRO+wkvtf+9Y4y933odF1mVmWWMcRi
Y81Njiyz893wZwPNFSDA6v0i65uHj/osi42OsxXMLLGuA3Weow8T491Vya+kdG6dkdMx8huH
dltsfW6wkw6wFoc50e1o4E8LTzKsOuep3UCy/Dre9lgH6QNDfc0HnVYN/UMynLx8yz7M27qV
Qa7ELi+iykH9GX3R+jfL4Gm0oFQY2X4eb0ynpmPg2U9Tr9P0GCsgVPYR+mbkAbSzvM6rR+sJ
rc7Bxs5+zpl9hbmPktaXBs1Me4fRa5yhgethVW9OqfVi5uQ912FguLrWVM/dJbGhIPw7ItHW
KsrLb0fOxHU5llb3XUWAOr2sjVrjo9rp0/FJLUppvb1B3R6Mn7VQ+h0ZYIdkYlZOlbrdQ4P/
ADfzle6h0XCvrwemmyzHw6p9GmmWk2MEsebBxs+lryVdpo6d0vGsfXXVh47ffaWgNbp3K5e/
rhsuycluTczKN7WdNNTicVzTtAquY4AMJ1Lt8eRVPLMylQ2iuiHfx2dQpc+nq4pzMSlpsqz3
NaHwO1tZBG6PzmpJrup9PwaX0UvffeXvaaqg7IsY+N7y5kztbM/BJRa70lNl2V9O6c447A0V
NFePU0QNx9lbQPiVFvp9J6WN3v8As7NfF9h/i55Ucj9Z6pRj814g+02/1zLKh+VyWR+tdRpx
easUDIv8C86Us/K5aTGm6fjOxsRrLDN7ybL3eNj/AHO/uWX9Ycr1G/ZseizJvw315FjW1+pS
OS1lwB3ajX2grbscWVveGl7mtLg0ckgTA+K4qzqefbmVdSxsqoudQbcz7IPfTWwgbb63kts2
7tPou5hA9lB0+lV5eV1GnqAe2ynJ325La5fjsDAK6qWCwS2wHUkALVr/AF3qLrjrj4JNdXg6
4j9I7+wPaPOUAV29PxHiu0X5/UrdzbA0MabHtA3hgmGsaJKv1V4+Bhhm7bTjslzz4DVzj5nl
IKKLqF1gDMTHMZOVLWO/cYPp2f2Rx5qxRRXRSyioba6wGtHkFW6fXY8vz72lt2SBsYea6R9B
nxP0j5ouZk/Z62hrfUuud6dVUxuJ517ADUlFTg9a6rj5Ga3FoutyKq6rS+nBsDLfXb9Eu1bu
aBPE68qhguwz0nIutx6dmM3HuybMUyzIJ1bTa5w9m18OeBor2f8AV3LGPTUHNy6cTeMENApf
S5/Ftl06ivyGqF16rKqZbc+t9mMa6fsuTS8V47HOIFz8ischx1Oh0TDe5TozzsfMuvZkXGi9
mTdWzqHT8e4jeWNPoiuw7ZO3UsPK2uiYV+PhtZlN97HvNDXn1H1VOPsrL+8BZvQOmYmVOY1o
pqqyC4Y+OZxH21DY3IqlodEecLpFFnycIoby/JIDg/WCvq7y+vYLeluDX76W7sim1hDmuNZP
6RgIkgaodGTiH1updatoP27H9NuO2tzPVqqJlxZb7nPJOg7BbDci27PNNJijGH6w/ndY4e2t
v9UalP1LDwM3EfT1FjbMfQkv02ns5ruWmeCFVvoueRoryjmufSL3dRqMYzy1tWXRWdG1ZFTo
bdTHLgZCS6zCw34wa3LvGVZWSzGvta0Wis/mOd+cfPukjxapa3T7G14d/VMj2/aS7IfPapoi
tv8AmBF6XTYzHN94jIy3etaPDd9Bn9lsBDzgMjIx+mt/mzF2QB2qrPsb/ad+RaHJWixNPqd1
jaW41BjIy3elWf3QdXv/ALLUndJ6c6quk0NNdZa4CI3Fn0S/bG75qGH+t5l2fzUycfF82tP6
R/8Aadp8lLqVj3NZhUHbflkt3DllY/nH/doPMpKY4f63l2dQOtTJoxPDaD+ks/tOEDyCWR+v
Zgwxrj45bZleDn811f8AfnfJFyrm4OIxmOwF/tpxafF3DR8ByVPDxRi44q3b3kl1th5e92rn
H5pKSuc1rXPeQ1rQXOceAByVTwWuybT1G0EbxsxWHltX739Z/PwTZP69k/YW/wBHph+Yf3jy
yn58u8kTMvtL24eKYybRJf2qr4Nh8+zR4pKR3n7fe7Eb/RaT+tOH57uRSPL977leDA4bNoLT
ptjSPCFDHoqx6W0VCGMEDxJ7knuT3VljfTZuP0nfR+CbOYhEyKgLYhja2hjAA1ukAQPkq2fk
vorbXQA7KvPp47Txu7vPkwalWHvYxjrHkNYwFznHgAakqngMfkWO6lcC11o24zDyynkf2n8l
Z5kZEyLI2MTFZi0NoYS6NXPPLnHVzj5kqq3/ACjk7+cLFd7PC25v539VnbzUs2yy+0dPx3Fr
3jdkWjmuo+H8p/A+9Nn5+N0jFpArEOcKqKtza26AuMvfo0BonVBTU69g9N61ZT0y2xn2mtxs
Y5tgFtTgPa4V/nz3HgksjCwLOpZuRf0++u3HNpey9wdXdjutIssIaWj1C4Dax0xtSTq6Wl3+
ltda23qFgh+Y7cwHltLdKm/d7vmpdTusZQKKDGTlu9Gk+E/Tf/ZbJVsAAAAQBoAqOJ+t5t2c
daqpx8Xw0P6V4+LtPktFibdVVONQ2pkMppaAJ4DWjkqr04G91nUrBByPbQD+bQ36P+d9Ipuo
E5NtfTWHS4epkkdqWnj+2dPvT57je9nTKTt9Vu69zdNlA0IHgX/RCSlsT9cyT1B38yya8Mfy
eH2/2uB5I2dlOx6gKhvyLj6eOzxee58mjUo36OqvtXVW34BrWj+AVLGe1/qdXyj6de0jHDvz
Kedx/lWc/ckpn7OmYbWNm697oaPzrrn6k/3+ARcPFNDHOtd6mTcd19ni7s1v8lvAQsSqy637
fkNLXuG3HqP+DrPj/Kd3+5XmMc9wa3UlJTOisOJc76DdT/cne8vcSfkiXFrAKWcN5PiVRzsp
2NSPSG/ItPp49fi8+Pk3kqjnyccqGwXgUgyf17K+wjXHph+Yezjyyn5/Sd5Kxm5X2aoFrfUu
sOyir9554HwHJ8k2PTV0/EPqP0YDZfc785x1e8oWFXZfaeoZDS1zxtxqjzXUe5/lP5P3KJKh
6HScG3Jy7ASJtyrzpuf5fkaFhtu6hn5L25A2ZNjvVp6TmtY6iyiBtfRa0GLG8k/gujzH4zMW
w5Ya6giHscNwcDpt295QundNqwazVU97qJ3Y9Nvu9EEasY4+6PLsiCp5jrr8XDFmPjZGTTeX
enl5r3b6nPe0O9G+PdAYPpNHsSW5m9Ixep3+vTeatpfTlCtrSLA7aLGy7h0NA3D4JI2K8Up+
p32V44qoMZGU4U0nwLvpP/stkooGPgYYH0MfGZz/ACWj8pVdvu6uXZHsc2sswmHXc0QbbJGk
nQRzCXU/c+ht/swWvD73nUOdIFVZA1jdqSdFosTHGf8AZcS7qWYCLr/0j2dw3iqlvnH4lGwM
eyqt12R/Ssk+pd/J/drHkwaIeV7uoUfavZjVuHozqLMh07ZiYDe08lWsl17KHnHZ6l/FbSQB
J0l09hykpq5P69k/YW/0eqH5h8Tyyn58u8km/wCUbw/nBx3ewdrbW/nf1GdvEoAYPsXoUPca
Nzz1DKAPqbm/zoDPp7nfDQLSp9H0a/Qj0do9Pb9HbGkJKScq2xv2enef5yzjyCFiir1AbDEc
DxKnkmw2kvEeA8lDnlIRqIOu5XRA3QucAC5xgAS4ngAd1RwQ7LuPUrAQ1w2YbD+bV3f8bPyJ
dVl1ba7ZZg/TzLefYCIrhsuhx+kfBFzvtBoFeL7fU0dc2D6dcSXNaNSY0bCpLkLv8o5Jr5ws
V36Q9rbW/m/1Wd/NXyeSTAGpJQcL7N9kq+yR9n2j048Pn38VX6nue3ZdNeA0b8q0alwnSsBs
uA/ePgkpVAOfe3MeP1Wk/qjD+e7g3H/vv3qWTbZk2uwsZxZt/pV4/MB/Mb/Ld+CLknINTK8M
AGyALdNtbI+kG/nGPogJsAYoxWjEO6sEguM7i+fcX7oO6eZSUmqqrpqbVU0MrYIa0dgknsc5
rHOa02OAkMBAJPhLoCSSn//ZDQplbmRzdHJlYW0NZW5kb2JqDTQ1IDAgb2JqDTw8L0JpdHNQ
ZXJDb21wb25lbnQgOC9Db2xvclNwYWNlIDYwMiAwIFIvRmlsdGVyL0RDVERlY29kZS9IZWln
aHQgMTI2L0xlbmd0aCA1MTYyL1N1YnR5cGUvSW1hZ2UvVHlwZS9YT2JqZWN0L1dpZHRoIDEy
MD4+c3RyZWFtDQr/2P/uAA5BZG9iZQBkgAAAAAH/2wCEAAwICAgJCAwJCQwRCwoLERUPDAwP
FRgTExUTExgXEhQUFBQSFxcbHB4cGxckJCcnJCQ1MzMzNTs7Ozs7Ozs7OzsBDQsLDQ4NEA4O
EBQODw4UFBARERAUHRQUFRQUHSUaFxcXFxolICMeHh4jICgoJSUoKDIyMDIyOzs7Ozs7Ozs7
O//AABEIAH4AeAMBIgACEQEDEQH/xAE/AAABBQEBAQEBAQAAAAAAAAADAAECBAUGBwgJCgsB
AAEFAQEBAQEBAAAAAAAAAAEAAgMEBQYHCAkKCxAAAQQBAwIEAgUHBggFAwwzAQACEQMEIRIx
BUFRYRMicYEyBhSRobFCIyQVUsFiMzRygtFDByWSU/Dh8WNzNRaisoMmRJNUZEXCo3Q2F9JV
4mXys4TD03Xj80YnlKSFtJXE1OT0pbXF1eX1VmZ2hpamtsbW5vY3R1dnd4eXp7fH1+f3EQAC
AgECBAQDBAUGBwcGBTUBAAIRAyExEgRBUWFxIhMFMoGRFKGxQiPBUtHwMyRi4XKCkkNTFWNz
NPElBhaisoMHJjXC0kSTVKMXZEVVNnRl4vKzhMPTdePzRpSkhbSVxNTk9KW1xdXl9VZmdoaW
prbG1ub2JzdHV2d3h5ent8f/2gAMAwEAAhEDEQA/AOww6G4OEBc8bmh1uRYeC93ue5VabzTj
3dVuYTflloop/O28UVDzMyUXN/W8mvpzda9Lsv8A4sH2V/23D7glR+vZhyzrjYpNeMOzrOLL
fl9FvzVhhTYOK7Hpiw78i1xsvf8AvWO5+Q4CqXZNdtxyrJdh4T9tLBqbsj6Pt8dvA80fqN7o
biUv9O24Fz7f9FS36dh/IPNDwKG2mvJ2enjUt24NJ7N49V38p3byS8FJ8PGsZvyMmDl3wbI4
Y0fRrb5N/Eq2xjnuDWiSVFX8aoUVG6z6RGgQlIRFqAsqt249Ipb9J30iqN99WPS++47a6xuc
UWx5seXHkrOd+v5uznEwnAv8LLxw34V/lVCcjKRJZGWI001XdRzj6dtw32T/AIOpv0K/l380
+FVZdYeoZDS2ywbaKjzXVzr/ACncu+5QP+UcqOcLFf7vC25vbzaz8SrtttdVb7bXBlbAXPce
AAmqR5eU3Fq37d9jzspqHL3nho/igVhnT8d+RlO9TJucDaWiS950bXWPAcBRqI93Vs79EA0i
it3NdZ8v33/7ETGptutGblN2vgjHoP8Agmnuf5bu/hwkpfExrA85eVByrBAaNW1s59Nv8T3V
okAEkwBqSeAElRP+U3lo/wCT6zDj/pnD80fyAefFJSmA9Ssba8Rg1ndSw/4Vw4sd/JH5o78p
Kxk5NeMwEgue87aqm/Se791o/wBYSSU5YZkNqGNO3qHUibch4/wVfBj+q32t81oPfj4GJMbK
KGhrWDnTRrR4koXT6bffmZAjJyoJb+4wfQr+XfzVDJus6l1AY2M6Ksck+oOA4e11v9n6LPPX
stJjZYuPZm3WG/6BcHZhHDnN+hjNP7lf53iVsKFNNVFTaam7a2CGhHpqdbYGj5lHZW6bCx/U
dvcPY38SpZd292xv0W/lR73topFbNCRAWdbbXTW+6122usFz3HsAqefJxGgyAUKa+fkW1tZj
439KySW1fyQPp2HyaPxQbGejXV0nBJY9zZst5Ndf51h/lvPHmoV2uorf1PIYXZWVFeNj/nBp
/m6h5n6Tv9it4WK7Hrc613qZNx35Fni7wH8lvAUKk1NNdNTKaW7a6xtY0eAVFz2Z1pte4Dp2
IS7cfo22M/OP8hn4lTzLH5FpwKHFgjdl3DTZWfzQf3n/AIDVQprZnbAxoZ0yiBTWNBaW8Oj9
xvbxQUzpY/Otbl3gtx2Hdi0u5J/0zx4/ujsrqdUsi2zKtdhYzixrdMq9v5oP+DYf3z+CSmNr
nZ9jsaoluJWduTaNN571MP8A1R+SPffViVMa1kuPsooZy4jhrR2A/BNbbRg0V1VMkn2Y+Ozl
x8B/EpYuK5jzkZBFmXYIc4fRY3/R1+X5UlLYuK9rzk5JD8p4gkfRY3/R1+Xie6SHZfbl2Ox8
N2ytp235Q7Huyrxd4nskkprdbz7aW14OJ7s7NJbU0ctb+dYfCFY6bgV4GM2lnuedbH/vO/uH
ZVukYN4st6pniM/L/M5FNQ+hS3/v3mtNafixrgEmByVp0VNxqS530uXH+CFg4/8AhXD+r/eo
5l+92xv0W8/FQZslCgviK1Q22Gx5ce6zMhzMzJdU8gYWERZlOP0XWD3NrPkz6Tvkj5+TZTW2
ugB2VkH06GngHu8+TBqVUqxq7i3ArJdhYjpyrDzddO4tJ766u+5VPFKfDa/Ku/aNwIBBbiVu
5bWeXkfvP/AIublPpDKqAH5V520MPHm938lvdEycmrGpdfafa3gDUuJ0a1o8SeFmVV5GVfa1
x23WQMy1p/mmctxqj+9+8UFM6MZt7TiVOLsRjicvI/OyLfzmg/u/vfctQAAAAQBoAOAAo111
1VtrraGVsG1rRwAEDKybA8YuLByrBMnVtbP9I/8AgO6SmOTfbZacLEMXRN13Iqaf+/nsPmne
+jp9DKaWFznHbTSDLnuOpJJ+9zimJp6dQ2mprrr7SdjJ99rz9Jzj+U9lLHx/R35WU8OyHD9J
Zw1jRrsZPDR+KSl8XFdW52RkOFmVYIe8fRY3nYzwaPxQXWWdRJroca8IGLL26Os8WVH93xd9
yb39T5mvp/hqHX/3V/l+CLkZfpvGJiMFmTAivhlbezrCOB4DkpKZXX4+DVXUxkuPtox6x7nR
2aPDxJSUaqKcJlmVk2h1pH6bJfpp+60fmt8AEklJkfExzc+T9BvJQ663WPDG8lajWsx6fIc+
ZWhOfCFkY35MMm4VV7G6OOg8gs572VsdZY4NYwFznHgAakolljrHlx7rI6nksssOO4F+Pjlr
shrebLHfzWO34nV3kqMpcRZEYsyL7fWr9mZmtjHB/wC0+KDrY4fvO5+MeC1KKacWhtNfsqqH
JPzLnH8ShYONZU192QQ7LyCHXOHAj6Nbf5LVQ6llWZuV+y8SHAa5DvzdPzXfyR38ePFDdCxu
u6lmNNB2tZrS4jStp09dw/fdxWOw1WtRRVj1NppG1jeO5JPJJ7k91HFxa8Wr02SSTue8/Sc4
8uco5eUMdrQ1vqX2nbTSOXH+DR3KClsvKdUW00NFmVbPpMPAA5e/waEL2dPqDGzkZmQZ8H2v
8T+61v4BMP1Fu5/6z1DKPA0LiOw/drYpsZXhVvzMywOvfAssj/Nrrb4eA7pKXqqZitsy8yxp
ucJuuOjWtH5jPBo/FDbVZ1BwsyGlmIDNWOdHWeD7R4eDfvTspsyHDLzx6ddfvpxnEQyP8Jb2
LvwCbfd1LSoupwTzaJFl3kzu1nnyeySmVmVdk2Ox8AgbTtuyolrP5LP3n/gEi/F6bW2mprrL
rSS2pvuttd3c4n8SdAonI1+w9LY0mr2vsj9DT5afSd/JHzR8XDrxtz5Nt9n87e/V7v7h4AJK
RVYdltjcnPIstaZqobrVV8P3nfyj8kkbKzKcUN3y6yzSqlgl7z/Jb/FJLVTq4eP6TNzvpu/A
IGXf6jtrfotR8u/Y3Y36R58gqDnNaC5xDWtBLnHgAclS5p2a+1O2jWz8s4tE1gOvtOyhp4Lv
3nfyWjUqp0nED9mU4l1bNxxy7l7nfzmS7zf+b4NVaoO6zmvtcCMRg2mdP0f0hX8bPpO/kwFq
Z+a3Cxw8MNtryK8ehuhfYfosHgPE9go/BDW6v1G6k14GCN/UcsH0m9q2D6Vr/ADsj9M6dV07
HFTDvsdrbaeXu8VDpnTnYvqZOU4W9Qyodk3DgR9GtngxnZWsjIqxqjbaYaNABqXE8NaO5KHg
FLZWSzGr3uBc5x211t+k954a1VAX4rvWuAv6llDaypp0a0fmNPZjfznd1HdbVY3IvZ6nULwW
42MDpWzuJ7fy3fJElmCPUtJyc/J0Ab9J5H5jB+axqSlwKsBjsnJcbsq6GlzRLnHtVU3w/wB5
TbRX/lDqbg1zP5qoatqns396w+P3KJjEeMnLP2jPu9tNVesD9yoHgfvOKZ+2h7MvqB9XLdpj
YtfuDT4Vt7u8XlFTJ1bsppyeo/oMOv3NxnmJj8+8/kaluyOoiGbsbBP5/wBG20fyf3GefJUq
8O3Ie2/qEEtO6rFaZrYfF377vwHZW7ba6a3W3PDK26ue4wAgpVNNVNbaqWBlbdGsaNFVtzbL
LHY2A0W3N0sud/NVf1iPpO/khQ/Weo/v4uEf7N1o/wDRbT9/wV2qqqmttVLBXWzRrGiAElIc
XCrxy60uN2RZ/OZD/pHyH7rfIJKOTnCuz7NjsORlkT6TTAaP3rXfmj8Uktd1Nx7y9xceSsXr
OTbk5DOjYmttsOyD2azmHflP3d1d6r1GvpuE7JcN7yQyiocvsdoxg+aB0bpz8HHfkZjg7Oyf
0uXaeB32A+DUR3U2mMxem4cE7aaRLnnUuJ5Pm5xUMSi2y37dlN23OEU1H/BVnt/Wd+d9yhSD
n3Ny7ARi1GcWs/nu/wBM4f8AU/err3srY6yxwaxglzjwAO6CmN11VFTrrnbK2CXOKz3WWm6v
IurL8p8/YsMmPTb3ss8D4ntwFGy999tdzqy9x92DiO0n/uxd4Adv70Ub8ex1NEZPUrwHXWu+
iwdi7waPzW90VLz9jdtH611PJEnsIHj+5W3/AF1UQXY1xZX+t9UuANjzoxje279xg7DkqDCW
+rVh2S+ZzepWRDSOQ3sSOw4aljVOvr9LC3Y+G4zZlu/nryeSwnUT+8fkkpdhNVz68b9c6k7T
IyH6V1jwMcAdmDXxVvFwmUOda9xuybNLL3/SI/daPzW+QRaKKceoU0MDK28NH5T4nzVV+Zdk
vNPToIaYsy3Ca2HuGfvu/BBSXKza8ctrDTdkWfzeOz6TvM/ut8yh1YVltjcnPcLbW610t/mq
vgD9J38o/JGxcOnFDiyX22a23PMvef5R/hwmys2nG2tINl1n81QzV7vgOw8zol5KTPe1jXPe
4NY0S5zjAA8SSqJyMjOaTjOOLhjV2W4Q9w/4IO4H8o/JV7nl9zRmj7VlfSq6bTqxng61x0Px
dp4BWRgW5RFnU3CwDVuKz+ZbH7375+OnkkpFj2bq/Q6NWG0z782wEtJ7ubPutd58JIzupeo4
09Or+1Pb7S8HbQz+tZ3+DUkf5eKmrgsPVs8dXtH6pjyzplZ/O7Pyf7XDfJWbD+0bnUN/oNLo
vcP8K8f4MfyW/nfcnyHuteOnYZ9MNaPXsboKq+zG/wAtw48BqrdVVdNbaqmhlbBDWjgAIKZE
hokw1rRqeAAFk35Lsy1mxnqVEzi4509Uj/DW+FTe3imy8p2daMbHb6tJPtZwLS06uce1TTz+
8dAkbG0ttFV0agZvUCNd3AqoHd3YAaD4ogKSgvqfbVj2CzMd7s3Nf9CoeHy/Nb96rmykUba3
PqwrHa2iTkZbzz6feD+990BRAdaW4ldEtZ7mYJOgnX1cx/iednK08bCFLzfc/wBfKcIdc4RA
/drb+a1JSCnAdc1hy2Nqx649DAZ9BscG2Ppu8uFdvyKcao23vDKxpJ8ewA7nyQcnNbVYMelh
vy3CW0tMQP3rHfmtUaMF3qjKzHi/KH0dIrrntW3/AL8dUFI/Syeoa5AdjYZ4x5iywf8ACkfR
b/JHzV5jGMYGVtDGNENa0QAB4BQyMmjGr9S921sw0cucfBrRqSsd+Tl9Veaqa/0IMOr3Qwf8
fa3n/i2fMpbqbeV1UFrvsr2NqYdtmbZrU0/u1j/CP8ghYuJk27nVb8Wu3+dyrdcu74dq2+H5
FL08LAsrdkuOXnRFNTGyWjwppbpW3z/FG+z9Qzf6U84lB/7T0umxw/4S0cfBv3oqYtvwsGcP
AqN+Ry+qrUz+9da7Qf2ipfYMjL16lZuZyMSkkVf23fSf+RMMvBxP1LAq9a1vNGOBAPjY/wCi
35mUDKJgHq+UKWP+jg4xO53k5zf0j/kAElNl/UMap32XDrOTczQUUAbWf13fQYkh0jOfWKsL
HZ03FHDrGg2R4tqboP7RSSU3MXFrxqhUyXEkue930nvPLneZWdn5j8u77Bh+8GRa4GAY+k3c
OGD84/II/Vn5/o+lhsMPB9W+R7G99rR7ifgFlg1tw7W4g9TGr2i9/DrZ4c+Pc2keA58kgpMb
KqqjVS5xrs9tl7IFl5bp6dHZtbe7uAE+Jj5GY5j64ppr9tdrB7Kx+7jNP0neNh+SHj14pe6z
qdoEbZpg7Sw/QL3NG30vANO3xJK6CQGy0SAPaGxqO0dklI8fHoxavTpaGMEucSdSe7nOPJ8y
qpyr80lmAfToGj80iQfKlp+kf5XCFkB1jfW6qfQw90Nxmy4eTsh7JEeX0Vpt27RtjbA2xxHa
IQUixsWjFYWUtjcZe8mXvd+89x1JVLqPW6cW37JjNOVnu+jQzXb5vjhQ6h+2Mqx+PRPT8Ng/
S5ell7x3FFde7b8Tr5Kr0c4r22Y/QAyprTGRmX+69zu/6N3vn+vHwRrupc4RBGb17Ih79GY7
DJM/mDbr/ZZ8yVerZn5LG10s/ZuIBDQAPXI/ktHtr/EqGOcGi2z0Gvy+pNHu9U7b3f1fW2Q3
+rohdQOeMc35rbHVd8TDJGn/AA1v04/qhJSdl3T8F7sbBqdk5bv5xlXveT43Wu0HzKr5F7rb
PSzbi55/7zcGXO/67aIP5AmpqY/CF1l7a8D/ALjdOa4t/wCuWMBsPnwtLp/7P+zj9n+n6Pf0
45/ld5+KSmrTi576xUwM6XijimiHWkfyn/Rb8pPmreLgYmIS6muLHfTtcS6x39Z7pKOoX2Pr
rLq6nXu7MYWg/e9zQhqpmks91fVchpffaMKnk1Y4NlxHm+P+paklSn//2Q0KZW5kc3RyZWFt
DWVuZG9iag00NiAwIG9iag08PC9CaXRzUGVyQ29tcG9uZW50IDgvQ29sb3JTcGFjZSA2MDIg
MCBSL0ZpbHRlci9EQ1REZWNvZGUvSGVpZ2h0IDEyNi9MZW5ndGggMzg4OS9TdWJ0eXBlL0lt
YWdlL1R5cGUvWE9iamVjdC9XaWR0aCAxMjA+PnN0cmVhbQ0K/9j/7gAOQWRvYmUAZIAAAAAB
/9sAhAAMCAgICQgMCQkMEQsKCxEVDwwMDxUYExMVExMYFxIUFBQUEhcXGxweHBsXJCQnJyQk
NTMzMzU7Ozs7Ozs7Ozs7AQ0LCw0ODRAODhAUDg8OFBQQEREQFB0UFBUUFB0lGhcXFxcaJSAj
Hh4eIyAoKCUlKCgyMjAyMjs7Ozs7Ozs7Ozv/wAARCAB+AHgDASIAAhEBAxEB/8QBPwAAAQUB
AQEBAQEAAAAAAAAAAwABAgQFBgcICQoLAQABBQEBAQEBAQAAAAAAAAABAAIDBAUGBwgJCgsQ
AAEEAQMCBAIFBwYIBQMMMwEAAhEDBCESMQVBUWETInGBMgYUkaGxQiMkFVLBYjM0coLRQwcl
klPw4fFjczUWorKDJkSTVGRFwqN0NhfSVeJl8rOEw9N14/NGJ5SkhbSVxNTk9KW1xdXl9VZm
doaWprbG1ub2N0dXZ3eHl6e3x9fn9xEAAgIBAgQEAwQFBgcHBgU1AQACEQMhMRIEQVFhcSIT
BTKBkRShsUIjwVLR8DMkYuFygpJDUxVjczTxJQYWorKDByY1wtJEk1SjF2RFVTZ0ZeLys4TD
03Xj80aUpIW0lcTU5PSltcXV5fVWZnaGlqa2xtbm9ic3R1dnd4eXp7fH/9oADAMBAAIRAxEA
PwDTfkuxLH332er1K87bLK9dnb0cceI4Lu3xV7p/RbLtt3UG7GAfo8QcAHX3/Hv491Z6T0On
Ai+532jMIg2kQ1o/dqb+aFZyM4i042Iz18r85swysHva7t8OVWJ7LUuRk4+JUH2na36LGNEu
cezWNHJVb7NfnEPzx6ePyzDBmfA3OHP9UaIuNgiqz7Re/wC0ZZEG1wgNH7tbfzQg9S6zi4BF
RPq5TvoUN517uiY/Kh5Kbl11OPUbbnNqqYNXHQDwCyc7MtydtRfZiUWfRpqE5l7f5Lf8E0+J
1+CgMfPyD9t6jaMOtmrXvgOYP+CY6Ws/rOl3wQq+q0Vudj9CxnX3P/nMhwLnOP7xJ9zv7RAR
AU2qsL0MQMuLOk9OZ/2nqcA8/wDG3eJ77dfNDd1WnHrbjdNpbRWf5tz2mXeddDf0j/iYCero
ubk2C/qV5DxqGtIc8eQdGxn9gT5rUxcLFxARj1hhd9J/L3f1nnUpaeanLp6dn5FoyLZqsH0c
jI22Xgf8FU39HV+JWhjdNxcew3gG3Jd9LItO+w/2jx8lYssrqYbLXNrYOXOIAHzKp/tQ3yOn
UPyh/pj+joH/AFx3P9kIalTfVTI6nh47/SLzbf2oqHqWf5rePms67Iqsf6ednG5/fC6eHEfB
zmS8/MgKxjjNYz0+nYFeDUfz7z7j5+nXJJ+LkaUlnq+V9Bren1Hu6Lbv80exv4oLmdFwLhbl
XC7M4D7Xerd8GsbMfABF/Zlt39OzLbweaq/0Nf8Ams9x+bkVtfTOmMkCnEbGrjDSfiT7il/L
RSP7fnX/ANDwn7Txbkn0m/HZq8/cEk37Yot0w6bsw/vVsIZ/25Ztb9ySX0Ur1snqGmKXY+Ie
ckiLLB/wQPA/lH5KyxmJgYxA20UM1c5xgT3c5x5JVbK6vTXvZj7bn16WWOcGU1/8ZZx/ZGqz
x9vzLW20U/bLBqzLygasSv8A4mj6bz5n70qU2MvNz8utxxHt6bgNH6TqWRAcW/8AA1uiP6zv
uWbgX0sLmfVrCfnXuJ9XquUSKye59R+r/wCzotRn1foutbkdWtf1O9plot9tLD/Iob7fvlab
nV017nltVTByYa0D8iVhTjV/V2zJsGR1vKdm2jUUs9lLfgBqtimmmisVUMbXWOGsED8FRs6y
14jpuPb1B0xurhlQ8zbZAj4Sq78D6x9Q0y81nTqTzRhDdZHg69/8Alr10U6GZ1PBwtMi4Nf2
rHuef7I1WW7r2TluLOn1EDjcG+tZ9zSK2/2np2dL+rHSzN7mWXHk3vNtjj/U1n7ldb1K2xob
gYNtjB9F1gGPX8t/u/6KWimnX0vqF7xbe1geOLct32iwf1ambamq47pFDxvz77csDkWv2VD/
AK2za1P6HWb/AOdyKsRp/Nx2eo//AD7dP+ih29N6VT+l6hYbnDXdl27h8mEhv4JX/IKZN6n0
jGHoYpa9w/wOIzeZ8/TED5qX2rqt39HwhQ3s/KeAf+269x/FRb1fp7GbcKt97BwMesiv5POx
n4qrd163dtb9mxieBbb6tnyqoDvypV4Kbn2DOu/pec+DzXjNFLf873P/ABTt6d0nC/TOqra7
n1rjud8d1hP4LPF+Zk/4XNyAfzcakYrP8+33qTOm3g+oOnY9Z/0ubc693x4IlL6qbp63gOO2
hz8t3G3HY6wT/WA2j70lWstsrbGV1mnGaPzMdtbIHhLy9JKgps4nRsPH2ueDkWV/QdZG1v8A
UrEMb8gp3dWwq7DUxxybx/gaB6jvnt0b8ysZ9uRks9TKeH1HX9Zubj0/9s0Fzz/aKJVe0s9K
nJtez/QdLxzWz/t1w/78lXdTfuyOpObvtdT0uj9+5wstj+rIYPxVRjulPeHsZkdZvHFjml7B
8C/bUPkh11ZLSbMboDjaDpd1C9gJ89TYR8lO3I+sjv5zL6bgVnsC614+bi1v4JKb4d1u/RlV
GEztvJueP7LNrfxQMrHw6W7usdSc5vdllraK/hsr2z81k34zMpvp5/1ntt/eZhhtc+RbXuUa
eh/VatxeKszLsPLjXaZ+b2gfijX8gEtxv1j+rWFLOnUuvfO132WknX+VY4D70G762dQsMU4l
WKDoHZVzN3ya06qwyrpVY/RdItdHBvLAP/BbT+RGbnmjSnCxMUce7Ipb+FQKWnb7VOX9q6vl
/wA5mPIP5mNVaR97G1g/56LT0m7dvGLlPd+84U0H4h7zY8ferruuX8Ozem0eAFj7D93tUf2o
530ur1f+g+M4/lL0tVKb0jKeZdh0E/vZV9t7v80DaVcp6b1JjdteRRjN/dxsZrfxcXfkVL7V
Q/6XUeoXf8XQ6v8AFtLUtmC/6WP1TK/rmwz972oaob7+mn/tV1HJf4/pG0j/AMDDVXfi/Vmk
7siyp7u7rri8/i+EJuNgj6HQ7nf8aGn/AM+WOVio31/0fojKvPfSyPuCSlqs/wCrlH9GFU+O
PSXn/wADYUkcZHWj9HCpZ/Wu/wDINSS/lupV3Qui3EGzCp3DUOawMcD/AFmQVXy/q+bmbKOp
ZuKB9Frbd7P814K1kkLKnjMr6sdcoEsA6oRy43mhx/sFjm/is+nJpqyTj5GCaMhvNdmT6Dz4
kb6gCP7S9DVfO6dg9Rq9LNpbc0fRJ+k0+LXDVp+CcJd0vL/a2117rOi9QfWPz2ZAsaR5ek4q
Des9HLtp6Lkl/g+9u7/NfaD+Ct3fVvqHTn+r0qw5NQ19FzjVe0fyLq4Dv7QQ2dXy3OdVZbW5
7Y34fU6gCP8Ar9Q0/ttR06fmpk3qHSuT9X7fmxtn/U70VnWukM46VXT/AFxVX/1TQoPzOl0A
O6n0i3p7TxlYpL6D5izHIgfEK1S3pua5p6d1y5hiRV6rLPvrvaSgpJT1/FOlWI3Xj07aD+Rw
VpvVr3fQwLT/AFX1H8j1Tv6R18SWZOFmTw3LxQ3T+tUdfuVN+L1Sk/pvq/h3t7vxH7CfgyAf
xSoIdv8AaOf/AOVuTH9Zn/kk37Rze/Tcj/Or/wDJLA+29MqMZPS8vBd3IteB/wBVt/FWqc3p
VgmrM6jSO3udYPub6iFeCXU/aeQOem5U+QYf+/p/2nkf+V2X/ms/8mqTcrHnazrrmO7MubUD
91jGuVpjeqOE0dSxrh23VA/+e7GpIZ/tPI/8rsv/ADWf+TSSjr7O2Jb8fUr/AIPSSU3klffh
Vn6JLSq9mJazgbh4hEwkOiaQJJyCOUyahSq5/S8HqDR9qrl7foXNJbY3+q9uqtJJKeZt6V1j
pLnW4Ln5ePy4U7WXgfyqnforfuBVRtfRerF3rYjLLmyLH4rfRyG+PqYtn47ZXYqj1LovT+pQ
++vbe36GRX7bG/2hyiJd0vP0dIymS7onUrHhv0qWWFljY7Oov3N/6lFZ1f6yYjxVe6jJdxsy
GHFtJ8jPpn+ySUTKwep4cHJYOp4zPo36tvYP+MZ7x+IRsfPdcwVV3MymP0GJngBzvKu9ssf8
0fxUzZ9aAwivqGFdjOPwcD8N22UU5H1ayyDa2llju9rDS8nyeQ2fkUHZgMPo7rukWu09C4B2
O4+QfurPyITW9LtpBLsXcw/4Xp7tsjzxrZYf7KGnkpu/sXEcyca+6th7Ms9Rn+bZvCrWfV+w
GW/Zb/H1aBW8/wBvHLPyKnTiUus24dtT7h/gjvwcgfJnsP8AmKycnqGJpdfkY0f9y6RkVf8A
b1EO+9HXupYdPyqOMS5g/ewsx3/U3QUlbx+pZ9jd7KKc6v8A0mHcCf8AMsj8qSGqHq0kklZX
I7Ka7PpDXx7qtZguGtZny7q6kmyhE7hTkua5phwgqK1n1seIcJVW3BPNZnyKiliI21RTTSUn
Mcww4QVFMQpUc3o2JlbntHo2u+k5oBa7/jKz7XflV5JJTgPbn9OYartrsU6EWg3YxHmTNlXz
3BSpdj1FvoWv6TZZqxjyLcSyf3HTs+4grdVC7pNY3uw3DHL9bKS3fQ/+vUdPm2EbUiybHlmz
rGC2+oajIoHqtHnt/nG/KU+NRur9To/UCax/gbD69Y8tSLG/eqzTdgPDQ49NcT7WvJtwnn+S
7R1f4Il5w3WB/U8d2BkH6ObS4hh+FzP+/hJS2RTXu39R6btd3zMIk/M7Ntg+4pK039rY4D63
s6jQdRJFd0eTh7Hfgkkp6dJQDipBwKljlhLrXmvpdJJJSIUkkkkpi9jHiHCVVtwe9Z+RVxJN
lEHdTkuY5phwgqK1n1seIcJVW3BPNZnyKiljI21RTTSUnMc0w4QVFMQpzWuaWuAc12jmkSCP
MKgenW4wJ6bYK2H6WJbLqHeQ7s+Wnkr6SSnFrbTVcK6nP6PluOlLodjWH+SPoH5QUlsW01X1
mq5jbK3fSY4SD96SNqdZJVcS/NsJZl4voub+e17X1u/q6h/3tVpQMigSFIP8VFJSQOQfLdeS
tGYIKdDTjd2U0cs/0oH6BFM0kwJ7hOpQb7/UUhSSSSKmL62PEOEqpbgka1mfIq6kmSETvSnJ
cxzTDhBUVqXejt/SxHmqNrKOa3z5EH+5RSiBsQUIUkkk1D//2Q0KZW5kc3RyZWFtDWVuZG9i
ag00NyAwIG9iag08PC9CaXRzUGVyQ29tcG9uZW50IDgvQ29sb3JTcGFjZSA2MDIgMCBSL0Zp
bHRlci9EQ1REZWNvZGUvSGVpZ2h0IDEyNi9MZW5ndGggMzgwOS9TdWJ0eXBlL0ltYWdlL1R5
cGUvWE9iamVjdC9XaWR0aCAxMjA+PnN0cmVhbQ0K/9j/7gAOQWRvYmUAZIAAAAAB/9sAhAAM
CAgICQgMCQkMEQsKCxEVDwwMDxUYExMVExMYFxIUFBQUEhcXGxweHBsXJCQnJyQkNTMzMzU7
Ozs7Ozs7Ozs7AQ0LCw0ODRAODhAUDg8OFBQQEREQFB0UFBUUFB0lGhcXFxcaJSAjHh4eIyAo
KCUlKCgyMjAyMjs7Ozs7Ozs7Ozv/wAARCAB+AHgDASIAAhEBAxEB/8QBPwAAAQUBAQEBAQEA
AAAAAAAAAwABAgQFBgcICQoLAQABBQEBAQEBAQAAAAAAAAABAAIDBAUGBwgJCgsQAAEEAQMC
BAIFBwYIBQMMMwEAAhEDBCESMQVBUWETInGBMgYUkaGxQiMkFVLBYjM0coLRQwclklPw4fFj
czUWorKDJkSTVGRFwqN0NhfSVeJl8rOEw9N14/NGJ5SkhbSVxNTk9KW1xdXl9VZmdoaWprbG
1ub2N0dXZ3eHl6e3x9fn9xEAAgIBAgQEAwQFBgcHBgU1AQACEQMhMRIEQVFhcSITBTKBkRSh
sUIjwVLR8DMkYuFygpJDUxVjczTxJQYWorKDByY1wtJEk1SjF2RFVTZ0ZeLys4TD03Xj80aU
pIW0lcTU5PSltcXV5fVWZnaGlqa2xtbm9ic3R1dnd4eXp7fH/9oADAMBAAIRAxEAPwD0jM6d
h5ob9orDns/m7RLXtP8AJe2CFV9HrGH/ADFg6hSP8FcQy4D+TaPa7+0PmtNJULK5zcb6wdOu
yPslzjiZg/7TZI9N582T7Xj+qVpKp1HpeB1Oj0M6ltzOWkjVp8Wu5BWP+z+qdH1xMiy3EHEj
1to/l1HUjzYZ8kaB20U9GksjH65YKhblUbqD/wBq8Um6r+00D1G/MLRxsvGy6/UxrWXM8WEH
70DEhSZIEhJJAEjZS4cpBwKgkpY55jfXzVSRJDkhOHFSxzxO+iKZpJg4J1KJA7G0ILcWqzUe
0+ISR0kOGN3SkaSSSorlJJJJKaOR0tptOVh2HEyj9J7BLH/8bXw748+aoW14jrwOp0/s/NcY
Zm0OLGWHysEa/wAl63VCyqu2t1drQ+twhzHCQR5gpwkpyrnfWLA91La+rY4GrCRTkf2T/Nv/
AATYf1r6VkPNN5fg5LdH0ZTTWQfj9H8Ub7Hm4Hu6c71scc4VruB/wNh+j8HafBIjpXWWmq+u
Mir6VbxsvrPiO8eY0R0O4+oU6LHse0OY4OaeHAyPwUlzr+hZeA42YTnvr8aHCq4fFn81Z8wC
h09X6/USKm09XbX/ADlMHFzGD+VU6WO+UIcN7FT0ySxMT629Oud6eTXdhXN+nXcw6H+zP38L
Vx8vFymb8a5lzfFjg78iBiR0UmSkhJJAEjZS4cUkySf7s6q1UpJRY9ljG2VuD2OEtc0yCPIq
SYpSSSSSlJJJJKUq2Z0/GzA02tIsZrXcw7bGH+S4aqykkpzPtOf0/TNacrFHGVW33tH/AAtY
/wCqb9yPbi9O6pSy0htzear6zDm+bHt1CuKhd0vba7J6fZ9kyHavAE1WH/hK/wCI1Tr+hU1M
vp2W1oF1beq47fo74rymD+RYIDvwKoM6fjZNjjhvbfcz6eNlbqMpkeF1e1/+cCFtU9U22txu
oV/ZMh2jCTNVh/4Oz+B1Rszp+JmtAyKw5zfoWCWvafFr2wQjxEbqee9XqmLZsq6hZiWk+3F6
owW1OPgzJr2mPmrDvrB1zB/5U6S51X/cnCf6rI/eLSA4fBXbKOpYzDWQ3quIdDVbtFwH9Y+x
/wA4Kr4lWK97m9Iyn4N7dX4NoJaPjRZqB5sKOh6AqT4v1p6Lktn1/R8Rc0sj4u+j+KSq5VNO
7d1bA9Nw/wC1+HJHxdsh4+YISQ4YqT4m2ykdQ6G8Gqwk24T/AGsLh9NoH+CsB57LQw8+jLDg
2WXV6W0PEPYfMfx4WX1LFv6XmO6x08fo7Y/aGNw18aC7ycO5VjJxMPreOzJx7XY+XV/M5Nft
tqd3Y4dx4tOhSNH+KnVSWHidYz8V5xur1bn1iXZFIOrf9Ia+dvm3juAtmm6q+tttL22VuEte
0yD8wmkEKZpJJIKUkkkkpSSSSSkd1FORU6q9jbK3aOY4SCqH2bP6frhE5WKOcWx36Ro/4Kx3
P9V33rTSRBU08Dq2D1De2h8XVGLcewFlrD/LY7UImXgYma0DIrDi3Vjx7XtPi17YIVbqnQ8L
qe2x+6jLq/mcyk7LmHycOR5HRZ7Opda6O8UdWYMzHJ215tQDXHwD28bkavWJ+im96fV8H+ad
+0ccf4Owht4H8l/0X/2o+KSuYmdi5jC/HsD40c3hzT4OadQfiklZ7aqSV2VX0tsYRZVa0Fp5
Ba4Lmra7+gdQYKnRh5J24znmGB3/AHGtd2H+jd2+jwtXE/yfnHAOmNkbrcM9mu5sp/7835q5
m4ePnYtmJkt31Wja4fxHmEgaPgVICMbquOHNLqrqne13FtNg5H+uhCzxj313uroe3A6ofc0g
TjZMdzX2PjHuHmqmKc3AzPslz/1uoBtF7tG31/mMt8+zXdjotwHE6rjFj2lrmOh7D7bKrB+Q
jsUdvJTWwOvV25H2DqFZweot5peZY/8AlU2cPH4rWWLl4tWUG9O6uAbJ/VM0ADcfDyf4jg9k
LHyOqdLtGLeDks/wbSfc4D/Qvd9Ij9x2vgSkYg7Kd9JU8DqvT+otJxLg97NLKj7bGHwfW6HN
+YVxMIrdSkkkklKSSSSUpRexljDXY0PY4Q5rhII8wVJJJThZfQ3UPF+CHODeGNdsuYP+BsPI
/kPkfBJbqSdxGlNbqGGMzGNYdstaQ+mwcssbq1ybp2YcvHD3t2X1k131/u2N+kPh3HkrSwur
WO6N1GvrDZ+xZG2jqLRw3tVf/Z+i7ySGun2Kb/VenNzqPaB69cmou4M/SY7+S7/asvFutdYw
td6eY2a6rLP8Js+ljZEfnt7O7jVdCCHAOaZB1BHgsrq2E1pdmNYX1OAGZU36Ra36NzI/Pr/I
lE9CptV2Y3U8Z9V1eo9t9D/pMd/rqCFWsApaMDqf6bEsIFGU7kH81thHDh+a7v8AFBrNllte
[truncated: 1,116,159 more chars]
